# Supplementary material for: Phylogenomic Analysis of Salmonella enterica subsp. enterica Serovar Bovismorbificans from Clinical and Food Samples Using Whole Genome Wide Core Genes and kmer Binning Methods to Identify Two Distinct Polyphyletic Genome Pathotypes
Source: Microorganisms. 2022 Jun 11;10(6):1199. doi: 10.3390/microorganisms10061199 (PMC9228720; doi:10.3390/microorganisms10061199)
Supplement: Supplementary file 1 [file microorganisms-10-01199-s001.zip]

Archive with 8 entries (8 files):
- Supplemental_Files_Figures.pdf
- Supplemental_File_S1.xlsx
- Supplemental_File_S2.csv
- Supplemental_File_S2.xlsx
- Supplemental_File_S3.xlsx
- Supplemental_File_S4.xlsx
- Supplemental_File_S5.xlsx
- Supplemental_File_S6.xlsx
