# Supplementary material for: Phylogenomic Analysis of Salmonella enterica subsp. enterica Serovar Bovismorbificans from Clinical and Food Samples Using Whole Genome Wide Core Genes and kmer Binning Methods to Identify Two Distinct Polyphyletic Genome Pathotypes
Source: Microorganisms. 2022 Jun 11;10(6):1199. doi: 10.3390/microorganisms10061199 (PMC9228720; doi:10.3390/microorganisms10061199)
Supplement: Supplementary file 1 [file microorganisms-10-01199-s001.zip › Supplemental_File_S1.xlsx]

## Sheet: Title Page
Supplemental_File_S6
Final list of GenBank Accessions for 645 complete genomes from 150 Salmonella serovars. After initial BLAST analysis, 150 representative closed genomes were used to define 2650 core genes based on LT2 gene sequences.

## Sheet: Representative Genomes
NCBI Accession	Given Serovar
LT2Genome	Typhimurium
NZ_CP047323	Typhimurium
NZ_CP047115	SCSM4.1
NZ_CP045958	Birkenhead
NZ_CP045956	Enteritidis
NZ_CP045955	Enteritidis
NZ_CP045954	Saintpaul
NZ_CP045952	Typhimurium
NZ_CP045949	Typhimurium
NZ_CP045947	Typhimurium
NZ_CP045945	Virchow
NZ_CP045831	Hvittingfoss
NZ_CP045762	Heidelberg
NZ_CP045759	Bareilly
NZ_CP045757	Bareilly
NZ_CP045754	Bareilly
NZ_CP045753	Bareilly
NZ_CP045447	Schwarzengrund
NZ_CP045444	Schwarzengrund
NZ_CP045063	Muenchen
NZ_CP045059	Muenchen
NZ_CP045056	Muenchen
NZ_CP045038	Muenster
NZ_CP044967	14[5]12:i:-
NZ_CP044961	14[5]12:i:-
NZ_CP044957	14[5]12:i:-
NZ_CP044203	Senftenberg-0405
NZ_CP044200	Corvallis-0406
NZ_CP044188	AR-0401
NZ_CP044186	AR-0402
NZ_CP044184	AR-0403
NZ_CP044181	Heidelberg-0404
NZ_CP044177	AR-0407
NZ_CP043667	Kentucky
NZ_CP043664	Kentucky
NZ_CP043662	Blockley
NZ_CP043433	Enteritidis
NZ_CP043402	Typhimurium	14028S.
NZ_CP043401	Typhimurium	14028S.
NZ_CP043400	Typhimurium	14028S.
NZ_CP043399	Typhimurium	14028S.
NZ_CP043222	Bredeney
NZ_CP043214	Heidelberg-312
NZ_CP043027	AD19
NZ_CP041976	Typhimurium
NZ_CP041973	Enteritidis
NZ_CP041699	Indiana
NZ_CP041208	Newport-8729
NZ_CP041184	Anatum
NZ_CP041183	Anatum
NZ_CP041181	Indiana	SJTUF13520v2
NZ_CP041179	Indiana	SJTUF87912v2
NZ_CP041176	Enteritidis
NZ_CP041173	Enteritidis
NZ_CP041171	Thompson
NZ_CP041026	14[5]12:i:-
NZ_CP040900	Typhimurium-6199
NZ_CP040700	Saintpaul	5
NZ_CP040686	4[5]12:i:-
NZ_CP040668	14[5]12:i:-
NZ_CP040651	14[5]12:i:-
NZ_CP040648	Rough:-:-
NZ_CP040646	Enteritidis-H9654
NZ_CP040644	Enteritidis-0432
NZ_CP040575	Typhi
NZ_CP040568	Typhimurium-8290
NZ_CP040566	Typhimurium-7299
NZ_CP040564	Typhimurium-7699
NZ_CP040562	Typhimurium-7399
NZ_CP040458	Typhimurium
NZ_CP040379	Montevideo
NZ_CP040321	Typhimurium
NZ_CP040318	Rough:-:-
NZ_CP039860	16C0703578
NZ_CP039856	G0203B005471
NZ_CP039854	17447945
NZ_CP039719	10C0786041
NZ_CP039716	10098816
NZ_CP039713	1344399
NZ_CP039610	E2640147322
NZ_CP039607	ID135534
NZ_CP039603	12C0807994
NZ_CP039599	12C0807861
NZ_CP039595	0803:MR1
NZ_CP039593	17437230
NZ_CP039591	Typhimurium
NZ_CP039588	10C0710427
NZ_CP039585	10C0786144
NZ_CP039582	ID109699
NZ_CP039579	ID106630
NZ_CP039576	Typhimurium
NZ_CP039572	ID105460
NZ_CP039569	ID100303
NZ_CP039567	ID99315
NZ_CP039565	85775617
NZ_CP039564	08-193-2358
NZ_CP039561	1607:MR00001R
NZ_CP039558	84833166
NZ_CP039509	Worthington.58
NZ_CP039503	Worthington.67
NZ_CP039500	Bareilly
NZ_CP039499	Bareilly
NZ_CP039498	Bareilly
NZ_CP039496	Bareilly
NZ_CP039493	Bareilly
NZ_CP039491	Bareilly
NZ_CP039489	Bareilly
NZ_CP039487	Bareilly
NZ_CP039486	Bareilly
NZ_CP039484	Bareilly
NZ_CP039482	Bareilly
NZ_CP039480	Bareilly
NZ_CP039478	Bareilly
NZ_CP039477	Bareilly
NZ_CP039476	Bareilly
NZ_CP039473	Bareilly
NZ_CP039471	Bareilly
NZ_CP039469	Bareilly
NZ_CP039467	Bareilly
NZ_CP039465	Bareilly
NZ_CP039463	Bareilly
NZ_CP039277	12-0523
NZ_CP039270	Senftenberg
NZ_CP039169	Goldcoast-5364
NZ_CP038849	14[5]12:i:-
NZ_CP038847	Typhimurium-365-0802
NZ_CP038608	Senftenberg-FD-2016-MI-02533-3
NZ_CP038604	Senftenberg-FD-2016-MI-02533-2
NZ_CP038601	Senftenberg-06
NZ_CP038595	Hadar-88
NZ_CP038593	Senftenberg
NZ_CP038591	Senftenberg
NZ_CP038233	Javiana-220
NZ_CP037960	Goldcoast.0877
NZ_CP037892	CFSAN087304
NZ_CP037882	4[5]12:i:-
NZ_CP037881	4[5]12:i:-
NZ_CP037879	4[5]12:i:-
NZ_CP037877	4[5]12:i:-
NZ_CP037874	4[5]12:i:-
NZ_CP036174	4[5]12:i:-
NZ_CP036168	Typhimurium
NZ_CP036167	Stanley
NZ_CP036166	Brancaster
NZ_CP036165	Albany
NZ_CP035301	ST1539
NZ_CP034968	Typhimurium
NZ_CP034723	Stanleyville
NZ_CP034721	Bareilly
NZ_CP034719	Typhimurium
NZ_CP034716	Stanleyville
NZ_CP034715	Mikawasima
NZ_CP034713	Mikawasima
NZ_CP034707	Waycross
NZ_CP034703	Stanleyville
NZ_CP034700	Stanleyville
NZ_CP034479	Typhimurium
NZ_CP034250	Derby
NZ_CP034230	Typhimurium
NZ_CP034177	Bareilly
NZ_CP033387	CFSA1007
NZ_CP033384	CFSA300
NZ_CP033360	EQAS2016S1
NZ_CP033356	CFSA664
NZ_CP033352	CFSA629
NZ_CP033350	CFSA231
NZ_CP033348	CFSA1096
NZ_CP033345	Tennessee
NZ_CP033344	Oranienburg
NZ_CP033343	Mbandaka
NZ_CP033340	Enteritidis
NZ_CP033338	Anatum
NZ_CP033257	CFSA12
NZ_CP033255	CFSA244
NZ_CP033226	CFSA122
NZ_CP033090	Enteritidis
NZ_CP032851	Enteritidis
NZ_CP032817	11TTU1590
NZ_CP032816	Montevideo-046
NZ_CP032815	11TTU1615b
NZ_CP032814	10TTU468x
NZ_CP032622	Bareilly
NZ_CP032494	Typhimurium
NZ_CP032490	Typhimurium
NZ_CP032449	Dublin-69838
NZ_CP032446	Dublin-69840
NZ_CP032444	Fresno-69835
NZ_CP032396	Dublin
NZ_CP032393	Dublin
NZ_CP032390	Dublin
NZ_CP032387	Dublin
NZ_CP032384	Dublin
NZ_CP032379	Dublin-69807
NZ_CP032304	Braenderup
NZ_CP032194	Senftenberg
NZ_CP031359	Heidelberg
NZ_CP030936	Typhi
NZ_CP030838	Napoli/17
NZ_CP030288	Gaminara
NZ_CP030175	Milwaukee
NZ_CP030029	Typhimurium
NZ_CP030024	Ohio
NZ_CP030005	Berta
NZ_CP030002	Brandenburg
NZ_CP029999	Brandenburg
NZ_CP029964	Typhi
NZ_CP029962	Typhi
NZ_CP029960	Typhi
NZ_CP029959	Typhi
NZ_CP029958	Typhi
NZ_CP029956	Typhi
NZ_CP029954	Typhi
NZ_CP029952	Typhi
NZ_CP029950	Typhi
NZ_CP029949	Typhi
NZ_CP029946	Typhi
NZ_CP029945	Typhi
NZ_CP029944	Typhi
NZ_CP029942	Typhi
NZ_CP029940	Typhi
NZ_CP029938	Typhi
NZ_CP029936	Typhi
NZ_CP029933	Typhi
NZ_CP029932	Typhi
NZ_CP029930	Typhi
NZ_CP029928	Typhi
NZ_CP029927	Typhi
NZ_CP029925	Typhi
NZ_CP029923	Typhi
NZ_CP029922	Typhi
NZ_CP029920	Typhi
NZ_CP029919	Typhi
NZ_CP029918	Typhi
NZ_CP029917	Typhi
NZ_CP029915	Typhi
NZ_CP029914	Typhi
NZ_CP029913	Typhi
NZ_CP029911	Typhi
NZ_CP029909	Typhi
NZ_CP029908	Typhi
NZ_CP029907	Typhi
NZ_CP029906	Typhi
NZ_CP029904	Typhi
NZ_CP029902	Typhi
NZ_CP029900	Typhi
NZ_CP029899	Typhi
NZ_CP029897	Typhi
NZ_CP029896	Typhi
NZ_CP029894	Typhi
NZ_CP029892	Typhi
NZ_CP029890	Typhi
NZ_CP029888	Typhi
NZ_CP029886	Typhi
NZ_CP029885	Typhi
NZ_CP029883	Typhi
NZ_CP029882	Typhi
NZ_CP029881	Typhi
NZ_CP029880	Typhi
NZ_CP029878	Typhi
NZ_CP029875	Typhi
NZ_CP029873	Typhi
NZ_CP029872	Typhi
NZ_CP029870	Typhi
NZ_CP029868	Typhi
NZ_CP029866	Typhi
NZ_CP029864	Typhi
NZ_CP029863	Typhi
NZ_CP029862	Typhi
NZ_CP029861	Typhi
NZ_CP029858	Typhi
NZ_CP029856	Typhi
NZ_CP029855	Typhi
NZ_CP029853	Typhi
NZ_CP029852	Typhi
NZ_CP029850	Typhi
NZ_CP029848	Typhi
NZ_CP029846	Typhi
NZ_CP029840	Typhimurium
NZ_CP029839	Typhimurium
NZ_CP029800	Anatum.0676
NZ_CP029646	Typhi
NZ_CP029336	Montevideo
NZ_CP029036	Senftenberg
NZ_CP029035	Montevideo
NZ_CP029029	Typhimurium
NZ_CP028900	California-SL01
NZ_CP028729	Thompson-SM-846
NZ_CP028318	Typhimurium	var.
NZ_CP028314	Typhimurium	var.
NZ_CP028311	Heidelberg
NZ_CP028199	Typhimurium
NZ_CP028196	Concord
NZ_CP028157	Enteritidis
NZ_CP028151	Enteritidis
NZ_CP028131	Indiana
NZ_CP027677	Corvallis-01738
NZ_CP027414	Typhimurium
NZ_CP027410	Typhimurium
NZ_CP026976	Heidelberg
NZ_CP026700	Typhimurium
NZ_CP026660	15-SA01028
NZ_CP026609	Derby
NZ_CP026379	Senftenberg-509
NZ_CP026327	Kentucky
NZ_CP025559	Enteritidis
NZ_CP025555	Typhimurium
NZ_CP025554	Enteritidis
NZ_CP025454	Agona-ARS-USMARC-76334
NZ_CP025453	Agona-ARS-USMARC-76341
NZ_CP025452	Agona-ARS-USMARC-76340
NZ_CP025451	Agona-ARS-USMARC-76339
NZ_CP025450	Agona-ARS-USMARC-76338
NZ_CP025449	Agona-ARS-USMARC-76337
NZ_CP025448	Agona-ARS-USMARC-76336
NZ_CP025447	Agona-ARS-USMARC-76335
NZ_CP025446	Agona-ARS-USMARC-76333
NZ_CP025445	Agona-ARS-USMARC-76332
NZ_CP025280	Brandenburg-ARS-USMARC-60983
NZ_CP025278	Montevideo-ARS-USMARC-1913
NZ_CP025276	USDA-ARS-USMARC-60984
NZ_CP025273	Newport-ARS-USMARC-1923
NZ_CP025248	Newport
NZ_CP025246	Newport
NZ_CP025243	Newport
NZ_CP025241	Newport-ARS-USMARC-1929
NZ_CP025237	Newport-ARS-USMARC-1928
NZ_CP025234	Newport-ARS-USMARC-1926
NZ_CP025232	Newport-ARS-USMARC-1925
NZ_CP025230	Newport-ARS-USMARC-1924
NZ_CP025218	Tennessee
NZ_CP025217	Tennessee
NZ_CP025094	Virchow
NZ_CP024619	Typhimurium
NZ_CP024168	Tennessee
NZ_CP024165	Gaminara
NZ_CP024164	Tennessee
NZ_CP023975	Typhi
NZ_CP023512	Saintpaul
NZ_CP023508	Paratyphi
NZ_CP023475	Enteritidis
NZ_CP023470	BAA-1672
NZ_CP023468	BAA-1586
NZ_CP023166	Saintpaul
NZ_CP022963	Pullorum-2D-Sal
NZ_CP022663	RM11065
NZ_CP022658	RM11060
NZ_CP022503	Hvittingfoss
NZ_CP022500	Kentucky
NZ_CP022497	Manhattan
NZ_CP022494	Derby
NZ_CP022491	Saintpaul
NZ_CP022490	Braenderup
NZ_CP022489	Mbandaka
NZ_CP022450	Indiana
NZ_CP022168	Typhimurium
NZ_CP022138	Waycross
NZ_CP022117	Macclesfield-1643
NZ_CP022116	Ouakam
NZ_CP022070	Typhimurium
NZ_CP022034	Onderstepoort
NZ_CP022019	Quebec-1267
NZ_CP022003	Enteritidis
NZ_CP021909	ST1120
NZ_CP021462	Typhimurium
NZ_CP020922	16A242
NZ_CP020912	Montevideo
NZ_CP020825	Enteritidis
NZ_CP020823	Enteritidis
NZ_CP020752	Montevideo
NZ_CP020565	Typhimurium
NZ_CP020492	08-00436
NZ_CP019681	Enteritidis
NZ_CP019649	Typhimurium-Stm6
NZ_CP019442	Typhimurium
NZ_CP019418	Yovokome-1850
NZ_CP019417	Wandsworth
NZ_CP019416	Nitra-1687
NZ_CP019415	Moscow-1843
NZ_CP019414	Manchester
NZ_CP019413	Krefeld
NZ_CP019412	Koessen-1501
NZ_CP019411	Johannesburg
NZ_CP019410	Hillingdon-D3
NZ_CP019409	Djakarta-1087
NZ_CP019408	Crossness-74
NZ_CP019407	Borreze
NZ_CP019406	Blegdam-1824
NZ_CP019405	Bergen
NZ_CP019404	Bardo
NZ_CP019403	Apapa
NZ_CP019383	Typhimurium
NZ_CP019206	Saintpaul
NZ_CP019204	Saintpaul
NZ_CP019202	Infantis
NZ_CP019201	Muenster
NZ_CP019198	Muenster
NZ_CP019197	Oranienburg
NZ_CP019196	Thompson
NZ_CP019192	Rubislaw
NZ_CP019189	Poona
NZ_CP019186	Pomona
NZ_CP019185	Paratyphi	A
NZ_CP019184	Minnesota
NZ_CP019183	Mbandaka
NZ_CP019181	Inverness
NZ_CP019179	Dublin
NZ_CP019178	Chester
NZ_CP019177	Albany
NZ_CP019176	Heidelberg
NZ_CP019174	Give
NZ_CP019172	Saintpaul
NZ_CP019116	Antsalova-0511
NZ_CP019035	Gallinarum
NZ_CP018661	Enteritidis-0621
NZ_CP018659	Enteritidis-0639
NZ_CP018657	Enteritidis-0392
NZ_CP018655	Enteritidis-1706
NZ_CP018651	Enteritidis-1705
NZ_CP018648	Enteritidis-1607
NZ_CP018647	Enteritidis-1435
NZ_CP018645	Enteritidis-2359
NZ_CP018644	Enteritidis-2980
NZ_CP018642	Enteritidis-1357
NZ_CP018637	Enteritidis-3861
NZ_CP018635	Enteritidis-3991
NZ_CP018633	Enteritidis-2444
NZ_CP018219	LSP/97
NZ_CP017978	Montevideo
NZ_CP017977	Montevideo
NZ_CP017976	Montevideo
NZ_CP017975	Montevideo
NZ_CP017974	Montevideo
NZ_CP017973	Montevideo-ARS-USMARC-1912
NZ_CP017972	Montevideo-ARS-USMARC-1904
NZ_CP017971	Montevideo-ARS-USMARC-1901
NZ_CP017970	Montevideo-ARS-USMARC-1900
NZ_CP017728	Typhimurium
NZ_CP017727	Saintpaul
NZ_CP017723	Stanleyville
NZ_CP017720	Minnesota
NZ_CP017719	Hayindogo
NZ_CP017621	Typhimurium
NZ_CP017617	Typhimurium
NZ_CP016837	Senftenberg
NZ_CP016754	Enteritidis
NZ_CP016586	Heidelberg-004
NZ_CP016579	Heidelberg-006
NZ_CP016576	Heidelberg-04-00437
NZ_CP016573	Heidelberg-04-00435
NZ_CP016569	Heidelberg-04-00320
NZ_CP016563	Heidelberg
NZ_CP016561	Heidelberg
NZ_CP016530	Heidelberg
NZ_CP016525	Heidelberg-036813-1A
NZ_CP016521	Heidelberg
NZ_CP016517	Heidelberg-R2-11-0435
NZ_CP016514	Heidelberg-004736-1-7
NZ_CP016507	Heidelberg-003
NZ_CP016504	Heidelberg-007
NZ_CP016412	Infantis
NZ_CP016410	Infantis
NZ_CP016408	Infantis
NZ_CP016406	Infantis
NZ_CP016385	Typhimurium-931
NZ_CP016357	Newport
NZ_CP016014	Newport
NZ_CP016012	Newport
NZ_CP016010	Newport
NZ_CP015924	Newport
NZ_CP015923	Newport
NZ_CP015526	Enteritidis
NZ_CP015524	Enteritidis
NZ_CP015157	Typhimurium
NZ_CP015024	Agona-2
NZ_CP014996	Weltevreden
NZ_CP014994	Tennessee
NZ_CP014983	Typhimurium
NZ_CP014982	Typhimurium-ARS-USMARC-1810
NZ_CP014981	Typhimurium	USDA-ARS-USMARC-1880
NZ_CP014979	Typhimurium
NZ_CP014977	Typhimurium-ARS-USMARC-1896
NZ_CP014975	Typhimurium	CDC	2009K-1640
NZ_CP014971	Typhimurium-ARS-USMARC-1898
NZ_CP014969	Typhimurium	USDA-ARS-USMARC-1808
NZ_CP014967	Typhimurium	CDC	2011K-1702
NZ_CP014965	Typhimurium	CDC	2010K-1587
NZ_CP014666	Anatum-ARS-USMARC-1781
NZ_CP014665	Anatum-ARS-USMARC-1766
NZ_CP014664	Anatum-ARS-USMARC-1728
NZ_CP014663	Anatum-ARS-USMARC-1677
NZ_CP014661	Anatum-ARS-USMARC-1783
NZ_CP014659	Anatum-ARS-USMARC-1765
NZ_CP014657	Anatum-ARS-USMARC-1736
NZ_CP014621	Anatum-ARS-USMARC-1727
NZ_CP014620	Anatum	USDA-ARS-USMARC-1676
NZ_CP014536	Typhimurium	SO3	isolate
NZ_CP014358	Typhimurium
NZ_CP014356	Typhimurium	SO2	isolate
NZ_CP013702	Typhimurium
NZ_CP013685	Newport-33
NZ_CP013226	Anatum-38
NZ_CP013222	Anatum-01
NZ_CP013097	Enteritidis
NZ_CP012930	Heidelberg-01290
NZ_CP012924	Heidelberg-74
NZ_CP012921	Heidelberg
NZ_CP012833	Cerro
NZ_CP012681	Typhimurium
NZ_CP012599	Newport-213
NZ_CP012598	Newport-109
NZ_CP012597	Newport-791
NZ_CP012514	Thompson
NZ_CP012513	Thompson
NZ_CP012349	Sloterdijk
NZ_CP012347	Pullorum
NZ_CP012346	Panama
NZ_CP012344	Choleraesuis
NZ_CP012151	Typhi/SF/13/03/195
NZ_CP012144	Typhimurium
NZ_CP012091	Typhi/13
NZ_CP011942	Enteritidis
NZ_CP011791	Enteritidis
NZ_CP011790	Enteritidis
NZ_CP011428	Typhimurium	YU39	isolate
NZ_CP011396	Thompson	ATCC	8391
NZ_CP011394	Enteritidis
NZ_CP011365	Typhimurium
NZ_CP011259	Agona
NZ_CP010284	Newport
NZ_CP010283	Newport
NZ_CP010282	Newport
NZ_CP010281	Newport
NZ_CP010280	Newport
NZ_CP010279	Newport
NZ_CP009768	Enteritidis
NZ_CP009561	Newport
NZ_CP009559	Paratyphi	A
NZ_CP009102	Typhimurium
NZ_CP009093	Enteritidis-SE11-10058
NZ_CP009092	Enteritidis-SE10-10052
NZ_CP009091	Enteritidis-SE9-10012
NZ_CP009090	Enteritidis-SE8-1021710
NZ_CP009089	Enteritidis-SE7-100819
NZ_CP009088	Enteritidis-SE6-00219-16
NZ_CP009087	Enteritidis-SE5-1104-2
NZ_CP009086	Enteritidis-SE4-0317-8
NZ_CP009085	Enteritidis	OLF-SE3-98983-4
NZ_CP009084	Enteritidis-SE2-98984-6
NZ_CP009083	Enteritidis-SE1-1019-1
NZ_CP009049	Paratyphi
NZ_CP008928	Enteritidis
NZ_CP008925	Cerro
NZ_CP007804	Typhimurium
NZ_CP007639	Choleraesuis
NZ_CP007598	Enteritidis-1427
NZ_CP007584	Anatum-ARS-USMARC-1735
NZ_CP007581	Typhimurium
NZ_CP007559	Newport
NZ_CP007540	Montevideo	CDC	86-0391
NZ_CP007534	Abony
NZ_CP007533	Bredeney
NZ_CP007532	Abaetetuba
NZ_CP007531	Anatum
NZ_CP007530	Montevideo-20
NZ_CP007528	Enteritidis
NZ_CP007523	Typhimurium
NZ_CP007507	Enteritidis
NZ_CP007505	Tennessee-19
NZ_CP007483	Anatum-ARS-USMARC-1175
NZ_CP007434	Enteritidis
NZ_CP007425	Enteritidis
NZ_CP007360	Enteritidis
NZ_CP007333	Enteritidis
NZ_CP007329	Enteritidis
NZ_CP007312	Enteritidis
NZ_CP007292	Enteritidis
NZ_CP007291	Enteritidis
NZ_CP007288	Enteritidis
NZ_CP007286	Enteritidis
NZ_CP007285	Enteritidis
NZ_CP007283	Enteritidis
NZ_CP007282	Enteritidis
NZ_CP007280	Enteritidis
NZ_CP007273	Enteritidis
NZ_CP007272	Enteritidis
NZ_CP007271	Enteritidis
NZ_CP007269	Enteritidis
NZ_CP007267	Enteritidis
NZ_CP007263	Enteritidis
NZ_CP007262	Enteritidis
NZ_CP007261	Enteritidis
NZ_CP007260	Enteritidis
NZ_CP007259	Enteritidis
NZ_CP007258	Enteritidis
NZ_CP007254	Enteritidis
NZ_CP007253	Enteritidis
NZ_CP007252	Enteritidis
NZ_CP007250	Enteritidis
NZ_CP007249	Enteritidis
NZ_CP007248	Enteritidis
NZ_CP007247	Enteritidis
NZ_CP007246	Enteritidis
NZ_CP007245	Enteritidis
NZ_CP007235	Typhimurium-ARS-USMARC-1899
NZ_CP007222	Montevideo-ARS-USMARC-1903
NZ_CP007216	Newport-ARS-USMARC-1927
NZ_CP007211	Anatum
NZ_CP007175	Enteritidis
NZ_CP005995	Heidelberg
NZ_AP019692	Senftenberg
NZ_AP014565	Typhimurium-3553
NC_022544	Typhimurium
NC_022525	Thompson
NC_022221	Gallinarum/pullorum-67
NC_021984	Pullorum
NC_021902	Newport-S3124.1
NC_021818	Cubana
NC_021176	Typhi
NC_020307	Javiana
NC_017623	Heidelberg
NC_017046	Typhimurium
NC_011205	Dublin
NC_011149	Agona
NC_011094	Schwarzengrund
NC_011083	Heidelberg
NC_011080	Newport
NC_010102	Paratyphi
NC_006905	Choleraesuis-B67
NC_006511	Paratyphi	A
NC_003198	Typhi
NC_003197	Typhimurium
CP022015	India
HF969015	Bovismorbificans
NC_004631	Typhi
NC_011274	Gallinarum
NC_011294	Enteritidis
NC_016831	Gallinarum/pullorum
NC_021820	4,[5],12:i:-
NC_021844	Bareilly
NZ_LN649235	Infantis
NZ_LN868943	Senftenberg
NZ_LN890518	Weltevreden
NZ_LS483455	Carmel
NZ_LS483457	Sundsvall
NZ_LT571437	Java
