# Supplementary material for: Phylogenomic Analysis of Salmonella enterica subsp. enterica Serovar Bovismorbificans from Clinical and Food Samples Using Whole Genome Wide Core Genes and kmer Binning Methods to Identify Two Distinct Polyphyletic Genome Pathotypes
Source: Microorganisms. 2022 Jun 11;10(6):1199. doi: 10.3390/microorganisms10061199 (PMC9228720; doi:10.3390/microorganisms10061199)
Supplement: Supplementary file 1 [file microorganisms-10-01199-s001.zip › Supplemental_File_S3.xlsx]

## Sheet: Title page
Supplemental_File_S3
Emerging properties of S.Bovismorbificans strains: Single Nucleotide Polymorphism (SNPs) in genomes of STs: 377,1499,2460 and 150 when compared with ST142 are given with core gene, chromosomal position, gene Position and annotated product encoded by the core gene locus. Refer to Figure 3

## Sheet: ST377_snps_annotated
locus	chrpos	genepos	N16_2207	N14_1267	N15_1496	N18_1144	sal610	N16_2718	N15_2358	N15_1010	Protein_Product
STM2015	2096219	75	G	G	G	G	A	G	G	G	putative periplasmic protein
STM1986	2069146	210	G	G	G	C	C	C	C	C	putative hydrolase of the HAD superfamily
STM4344	4587060	964	T	T	T	T	T	T	C	T	putative pyruvate oxidase
STM2930	3070363	390	C	C	C	A	A	A	A	A	4-phosphocytidyl-2C-methyl-D-erythritol synthase
STM3610	3783778	649	T	T	G	G	G	G	G	G	putative inner membrane protein
STM4547	4806627	501	C	C	A	C	C	C	C	C	putative LuxR/UhpA family transcriptional regulator
STM4168	4385731	511	C	T	C	C	C	C	C	C	endonuclease V
STM3073	3234620	288	C	C	C	T	T	T	T	T	putative ABC-type cobalt transport system
STM4556	4810944	213	G	A	G	G	G	G	G	G	16S ribosomal rRNA
STM1714	1809554	233	C	C	C	C	C	C	T	C	DNA topoisomerase type I, omega protein
STM4413	4652135	1049	C	C	A	A	A	A	A	A	putative imidazolonepropionase and related amidohydrolases
STM3705	3899999	888	T	T	C	T	T	T	T	T	putative membrane protein
STM2065	2137487	1186	T	C	C	C	C	C	C	C	hydrogen sulfide production membrane anchoring protein
STM0149	171673	138	G	G	G	G	G	G	T	G	putative permease of the Na+:galactoside symporter family
STM0233	274314	138	C	C	A	C	C	C	C	C	putative endochitinase
STM3919	4128977	786	C	C	C	C	T	C	C	C	modulator of enterobacterial common antigen (ECA) polysaccharide chain length
STM0136	161371	2683	C	C	A	C	C	C	C	C	preprotein translocase; secretion protein of IISP family
STM2216	2317464	1264	T	T	T	A	A	A	A	A	putative ABC transporter periplasmic binding protein
STM4377	4620007	489	G	G	A	G	G	G	G	G	putative acyl-CoA dehydrogenase
STM1890	1984693	385	C	C	T	C	C	C	C	C	putative peptidase
STM3105	3263745	604	T	T	T	A	T	T	T	T	putative periplasmic protein
STM3105	3263503	846	G	G	G	A	A	A	A	A	putative periplasmic protein
STM1469	1545123	1240	G	G	G	G	G	G	A	G	fumarase C
STM2563	2705149	261	C	C	A	C	C	C	C	C	putative transcriptional regulator of two-component regulator protein (EBP familiiy)
STM4593	4848669	862	G	G	G	G	G	G	G	A	putative fimbrial usher protein
STM3599	3770005	1102	C	C	C	C	C	C	A	C	putative inner membrane protein
STM1168	1253576	480	G	G	G	A	G	G	G	G	putative cytoplasmic protein
STM1360	1441288	57	C	C	C	A	C	C	C	C	putative MFS family transport protein
STM1360	1440257	1088	A	A	T	A	A	A	A	A	putative MFS family transport protein
STM4241	4461392	425	G	G	G	G	G	G	T	G	transcriptional repressor of znuABC operon
STM2127	2216008	502	T	T	G	G	G	G	G	G	putative outer membrane receptor
STM3879	4087553	211	A	A	G	G	G	G	G	G	putative regulator protein
STM1756	1852110	565	C	C	C	C	T	C	C	C	formyltetrahydrofolate hydrolase
STM3172	3333512	963	A	A	A	A	G	G	G	G	suppressor of ftsI
STM0484	542775	1866	C	C	T	C	C	C	C	C	DNA polymerase III, tau and gamma subunits
STM3139	3300943	1412	C	C	C	T	T	T	T	T	glutathionylspermidine synthetase
STM2907	3048989	222	T	T	T	C	C	C	C	C	serine/threonine specific protein phosphatase 2
STM3010	3166381	1498	A	A	A	G	G	G	G	G	2-acylglycerophospho-ethanolamine acyl transferase
STM1557	1635562	836	T	C	C	C	C	C	C	C	putative aminotransferase
STM2207	2307850	129	G	G	G	G	G	G	A	G	proton efflux pump
STM1274	1353125	6	G	G	A	A	A	A	A	A	putative inner membrane protein
STM4337	4580371	302	C	A	C	C	C	C	C	C	putative luxR family bacterial regulatory protein
STM1318	1396579	527	G	G	G	A	A	A	A	A	catalase
STM1318	1396338	768	G	G	G	T	G	G	G	G	catalase
STM3467	3617356	1023	C	C	C	C	C	T	C	T	putative inner membrane protein
STM3467	3618146	1813	C	C	T	C	C	C	C	C	putative inner membrane protein
STM3128	3286866	651	G	G	G	G	A	A	A	A	putative oxidoreductase
STM0981	1067314	1616	C	C	C	T	T	T	T	T	30S ribosomal subunit protein S1
STM3247	3414086	1132	G	G	G	G	G	T	G	T	glycerate kinase
STM4108	4321664	1053	G	A	G	G	G	G	G	G	glycerol dehydrogenase, NAD
STM2347	2458598	421	G	G	G	G	A	A	A	A	putative phosphoesterase
STM3461	3612104	30	C	C	C	T	T	T	T	T	putative cytoplasmic protein
STM0886	957581	1356	T	T	C	C	C	C	C	C	putative sulfatase
STM3878	4085833	486	G	G	A	G	G	G	G	G	putative inner membrane protein
STM3878	4085511	808	A	A	G	G	G	G	G	G	putative inner membrane protein
STM3211	3376294	71	G	G	G	A	A	A	A	A	sigma D factor of RNA polymerase
STM3369	3535590	358	T	C	C	C	C	C	C	C	putative protease
STM0450	506913	1382	G	G	G	G	G	A	G	A	DNA-binding protein
STM0142	164190	938	G	G	A	G	G	G	G	G	putative component in type IV pilin biogenesis
STM1606	1696466	176	T	T	T	C	C	C	C	C	putative benzoate membrane transport protein
STM3129	3289430	464	C	C	C	C	C	C	A	C	putative NAD-dependent aldehyde dehydrogenase
STM1218	1303914	67	C	C	C	C	T	C	C	C	ATP-binding protein ABC transporter
STM4481	4724603	147	G	G	G	A	A	A	A	A	L-idonate regulator
STM1392	1475017	1811	A	A	G	G	G	G	G	G	secretion system regulator: Sensor component
STM1392	1474277	2551	G	A	G	G	G	G	G	G	secretion system regulator: Sensor component
STM0837	903341	560	C	C	C	T	T	T	T	T	putative periplasmic protein
STM3273	3439371	169	T	T	T	T	T	T	C	T	putative lipid carrier protein
STM2263	2360569	193	G	A	G	G	G	G	G	G	putative ABC-type multidrug/protein/lipid transport system
STM3935	4141131	805	G	G	A	G	G	G	G	G	protein for a late step of protoheme IX synthesis
STM1383	1465372	975	G	A	G	G	G	G	G	G	tetrathionate reductase complex, subunit A
STM3183	3345669	802	C	C	T	C	C	C	C	C	cyclic 3',5'-adenosine monophosphate phosphodiesterase
STM0088	101277	148	C	C	C	C	C	T	C	C	diadenosine tetraphosphatase
STM0885	956039	144	C	C	C	A	C	C	C	C	putative inner membrane protein; homology to SgaT from Vibrio
STM2570	2714979	230	T	T	G	T	T	T	T	T	putative phosphotransferase system IIB components
STM0735	800711	218	C	C	C	T	T	T	T	T	succinate dehydrogenase, Fe-S protein
STM0735	800880	387	G	G	T	G	G	G	G	G	succinate dehydrogenase, Fe-S protein
STM1806	1907296	488	G	G	G	G	G	G	G	T	NhaB family of transport protein
STM2583	2726765	9	C	C	C	C	C	C	T	C	GTP-binding elongation factor
STM2583	2726761	13	A	A	C	C	C	C	A	C	GTP-binding elongation factor
STM2583	2726759	15	A	A	T	T	T	T	A	T	GTP-binding elongation factor
STM2583	2726756	18	T	T	C	C	C	C	T	C	GTP-binding elongation factor
STM2583	2726753	21	C	C	T	T	T	T	C	T	GTP-binding elongation factor
STM2583	2726750	24	C	C	G	G	G	G	C	G	GTP-binding elongation factor
STM1151	1238209	275	A	A	A	A	A	C	A	A	membrane glycosyltransferase
STM3415	3582334	975	A	T	A	A	A	A	A	A	RNA polymerase, alpha subunit
STM0627	690070	325	T	T	T	T	T	A	T	A	DcuC family, dicarboxylate transporter
STM4220	4438106	378	C	C	C	C	C	C	T	C	lysine sensitive aspartokinase III
STM2449	2559467	228	C	C	T	T	T	T	T	T	putative acetyltransferase
STM2256	2354253	42	G	G	G	G	A	G	G	G	periplasmic small subunit nitrate reductase of cytochrome C550
STM0112	130654	423	G	G	G	T	T	T	T	T	3-isopropylmalate dehydrogenase
STM2783	2930344	874	C	C	C	C	T	C	C	C	putative nickel transporter
STM1182	1264702	274	G	A	G	G	G	G	G	G	flagellar biosynthesis protein
STM1845	1939285	1847	C	C	C	C	C	A	C	A	carboxy-terminal protease for penicillin-binding protein 3
STM0126	148671	1286	G	A	G	G	G	G	G	G	UDP-N-acetylmuramoylalanine-D-glutamate ligase
STM3602	3774440	102	G	G	G	G	G	T	G	T	putative gntR family regulatory protein
STM4373	4616663	41	G	G	A	A	A	A	A	A	putative cytoplasmic protein
STM1415	1496019	346	C	C	G	C	C	C	C	C	secretion system apparatus protein
STM0423	476167	351	G	G	G	G	G	A	G	G	geranyltranstransferase (farnesyldiphosphate synthase)
STM3407	3577645	194	G	G	A	G	G	G	G	G	10-formyltetrahydrofolate:L-methionyl-tRNA(fMet) N-formyltransferase
STM0703	765879	1138	T	T	T	T	T	T	A	T	sensory kinase in two-component regulatory system wtih KdpE
STM2360	2470352	913	A	G	A	A	A	A	A	A	putative diaminopimelate decarboxylase
STM1700	1792507	391	C	C	C	A	A	A	A	A	enoyl-[acyl-carrier-protein reductase (NADH)
STM4298	4543271	990	T	T	A	A	A	A	A	A	alpha-galactosidase
STM0006	4586	1381	G	G	A	G	G	G	G	G	putative alanine/glycine transport protein
STM3624	3807291	874	G	G	G	A	A	A	A	A	cystathionine gamma-synthase
STM1378	1459653	265	C	C	A	C	C	C	C	C	pyruvate kinase I
STM2531	2665393	55	C	C	C	T	T	T	T	T	transglycosylase of penicillin-binding protein 1c
STM3794	3995345	504	G	G	G	G	A	A	A	A	putative deoR family regulatory protein
STM1156	1244314	585	A	G	A	A	A	A	A	A	putative enzyme related to sulfur transferases
STM2458	2567135	116	G	G	G	T	T	T	T	T	ethanolamine ammonia-lyase, heavy chain
STM1430	1507603	309	G	G	G	G	G	G	A	G	transcriptional repressor for pur regulon, glyA, glnB, prsA, speA (GalR/LacI family)
STM2644	2784069	190	A	A	A	A	G	A	A	A	putative LysR family transcriptional regulator
STM3773	3969995	2567	A	G	G	G	G	G	G	G	putative NtrC family transcriptional regulator
STM0851	922784	270	C	C	C	G	C	C	C	C	putative ABC transporter inner membrane component
STM3809	4009922	7	T	T	T	T	C	T	T	T	small heat shock protein
STM2827	2971001	375	C	C	C	A	C	C	C	C	alanyl-tRNA synthetase
STM1563	1643950	281	G	G	G	G	G	G	G	A	putative resistance protein
STM1563	1643805	426	A	A	A	G	G	G	G	G	putative resistance protein
STM4333	4578035	523	G	G	G	A	A	A	A	A	putative aminomutase
STM3542	3711388	120	G	G	G	G	G	T	G	T	gluconate kinase 2 in GNT I system
STM0980	1064846	44	G	G	A	G	G	G	G	G	cytidine monophosphate (CMP) kinase
STM3576	3743173	730	A	A	A	C	A	A	A	A	P-type ATPase family
STM1913	2006576	1634	C	C	T	C	C	C	C	C	flagellar biosynthesis protein
STM3374	3542838	686	T	T	T	T	T	C	T	T	rod shape-determining protein
STM2481	2596183	2552	G	G	G	A	A	A	A	A	RND family aminoglycoside/multidrug efflux pump
STM3233	3399104	612	C	C	C	C	T	C	C	C	putative glutathione S-transferase
STM1139	1227480	535	C	C	A	C	C	C	C	C	putative transcriptional regulator in curly assembly/transport, 2nd curli operon
STM1100	1187079	416	C	C	C	C	C	C	T	C	4-hydroxyphenylacetate catabolism protein
STM2519	2650462	996	G	G	G	G	G	A	G	A	putative GTP-binding protein
STM3585	3751534	313	T	T	T	C	T	T	T	T	putative ABC superfamily transport protein
STM0117	137855	306	G	G	A	G	G	G	G	G	acetolactate synthase III, small subunit
STM1265	1347548	37	G	G	A	G	G	G	G	G	putative response regulators
STM4323	4566772	627	G	G	G	G	T	T	T	T	thiol:disulfide interchange protein
STM0107	123368	734	T	T	G	T	T	T	T	T	putative binding-protein-dependent transport system inner membrane component
STM3178	3342689	1240	A	T	A	A	A	A	A	A	putative sensory histidine kinase in regulatory system
STM2995	3147161	2492	C	C	C	T	T	T	T	T	protease III
STM4511	4764318	767	T	C	T	T	T	T	T	T	putative LysR family transcriptional regulator
STM2118	2201500	10	T	T	C	T	T	T	T	T	putative polysaccharide export protein
STM2105	2187896	603	T	T	C	C	C	C	C	C	mannose-1-phosphate
STM1450	1525164	364	G	A	A	A	A	A	A	A	pyridoxal kinase 2
STM3958	4164100	1530	A	A	A	A	A	C	A	C	ATP-dependent DNA helicase
STM2553	2692268	1210	G	G	G	A	A	A	A	A	stationary phase inducible protein
STM0340	383917	488	G	G	G	G	A	G	G	G	putative fimbriae; major subunit
STM2982	3133540	739	C	C	C	C	T	C	C	C	regulator of gcv operon
STM3587	3755485	224	T	T	G	G	G	G	G	G	putative membrane protein
STM0046	56395	2558	C	-	C	T	T	T	T	T	isoleucine tRNA synthetase
STM3368	3533290	1068	G	G	G	A	A	A	A	A	suppresses inhibitory activity of CsrA
STM3382	3553506	1247	G	G	G	A	G	G	G	G	SSS family sodium/pantothenate symporter
STM4374	4617366	45	C	C	C	T	T	T	T	T	putative inner membrane protein
STM4382	4622851	971	A	A	A	A	G	A	A	A	putative Zn-dependent hydrolases of the beta-lactamase fold
STM3179	3343390	485	A	A	G	G	G	G	G	G	NADPH specific quinone oxidoreductase
STM1615	1705316	806	T	G	G	G	G	G	G	G	putative nucleoside triphosphatase
STM0502	562846	373	G	G	G	G	G	G	T	G	putative ABC-type sugar/spermidine/putrescine transport system, ATPase component
STM1598	1688279	110	G	A	G	G	G	G	G	G	putative gntR family regulatory protein
STM1598	1687908	481	C	C	C	A	A	A	A	A	putative gntR family regulatory protein
STM1598	1687778	611	T	C	C	C	C	C	C	C	putative gntR family regulatory protein
STM4396	4632809	284	G	G	G	G	G	A	G	A	putative cell envelope opacity-associated protein A
STM1494	1571165	88	G	G	A	G	G	G	G	G	ABC-type transport system protein
STM1824	1921655	505	T	C	T	T	T	T	T	T	p-aminobenzoate synthetase, component I
STM3731	3924908	175	G	G	G	G	T	G	G	G	deoxyuridinetriphosphatase
STM0600	662184	921	C	C	C	C	T	C	C	C	carbon starvation protein
STM2106	2189149	789	C	C	C	C	C	C	T	C	putative glycosyl transferase
STM3405	3575502	186	A	A	A	T	T	T	T	T	putative protein involved in DNA uptake
STM1437	1513935	139	C	C	C	C	T	C	C	C	putative TetR/AcrR family transcriptional repressor
STM2123	2209376	855	G	G	G	G	G	G	T	G	putative PAS/PAC domain protein
STM2101	2182365	292	C	C	C	C	C	A	C	A	putative galactokinase
STM1498	1573035	1377	G	G	G	A	A	A	A	A	putative dimethyl sulfoxide reductase
STM1566	1646394	591	C	C	T	C	C	C	C	C	NAD-linked malate dehydrogenase
STM0043	52034	247	T	T	T	A	A	A	A	A	30S ribosomal subunit protein S20
STM2981	3133475	390	A	A	G	G	G	G	G	G	putative small membrane protein
STM2803	2949274	462	G	A	G	G	G	G	G	G	putative gntR family regulatory protein
STM3799	3999982	831	C	C	C	T	C	C	C	C	putative periplasmic protein
STM4090	4297565	603	A	G	G	G	G	G	G	G	1,4-dihydroxy-2-naphthoate octaprenyltransferase
STM1488	1565817	737	C	C	C	T	T	T	T	T	transcriptional repressor of ptsG and ptsHI
STM0533	595486	570	T	T	C	C	C	C	C	C	phosphoribosylaminoimidazole carboxylase = AIR carboxylase, CO(2)-fixing subunit
STM0637	698162	243	C	C	C	T	T	T	T	T	D-alanyl-D-alanine carboxypeptidase, penicillin-binding protein 5
STM4154	4370586	575	A	C	C	C	C	C	C	C	RNA polymerase, beta prime subunit
STM0831	897325	166	C	C	C	A	C	C	C	C	stress response DNA-binding protein; starvation induced resistance to H2O2
STM1308	1388823	292	T	T	C	C	C	C	C	C	periplasmic protein related to spheroblast formation
STM2784	2932011	353	C	C	C	C	T	T	T	T	tricarboxylic transport regulatory protein
STM1394	1481148	762	G	G	G	A	G	G	G	G	secretion system apparatus protein
STM3220	3387480	882	C	C	C	C	C	A	C	A	putative methyltransferase
STM3287	3455050	1271	A	A	A	A	A	A	G	A	L factor
STM0011	10719	123	A	A	A	G	A	A	A	A	putative periplasmic protein
STM4348	4591964	631	G	G	G	G	G	G	A	G	phosphatidylserine decarboxylase
STM1768	1866690	27	T	T	C	T	T	T	T	T	putative invasin
STM1252	1336979	674	C	C	C	C	C	C	T	C	putative cytoplasmic protein
STM0130	153455	861	T	T	T	T	C	C	C	C	D-alanine-D-alanine ligase B
STM3985	4193200	176	G	-	G	G	A	G	G	G	putative cytoplasmic protein
STM3985	4193417	393	G	-	G	A	A	A	A	A	putative cytoplasmic protein
STM3700	3894881	149	C	C	A	C	C	C	C	C	glycerol-3-phosphate dehydrogenase (NAD+)
STM3700	3894666	364	G	G	G	G	A	G	G	G	glycerol-3-phosphate dehydrogenase (NAD+)
STM3700	3894576	454	T	C	C	C	C	C	C	C	glycerol-3-phosphate dehydrogenase (NAD+)
STM1185	1266194	2151	A	G	G	G	G	G	G	G	RNase E
STM0591	651570	10	A	G	G	G	G	G	G	G	ferric enterobactin transporter
STM2876	3020256	411	C	C	C	C	C	C	A	C	invasion genes transcription activator
STM4410	4647966	183	G	G	T	G	G	G	G	G	putative periplasmic protein
STM4410	4648154	371	G	G	G	A	A	A	A	A	putative periplasmic protein
STM0729	794000	775	G	G	G	G	G	G	C	G	putative transport protein
STM0705	768939	1352	A	A	A	A	A	A	A	T	P-type ATPase, high-affinity potassium transport system, B chain
STM3367	3533713	409	G	G	G	A	A	A	A	A	putative LysR family transcriptional regulator
STM0665	728305	608	T	T	T	T	T	T	T	C	glutamate/aspartate transporter
STM0791	857771	1121	C	C	T	C	C	C	C	C	histidine ammonia lyase
STM2445	2556390	209	A	A	A	A	C	A	A	A	putative oxidoreductase
STM3842	4047290	866	G	G	G	A	A	A	A	A	putative preprotein translocase subunit YidC
STM4517	4770863	1198	G	G	A	G	G	G	G	G	putative MFS family transport protein
STM0038	44491	187	C	-	C	C	C	T	C	T	putative arylsulfatase
STM0731	797439	240	C	C	C	C	C	A	C	A	putative inner membrane protein
STM2320	2429699	99	A	G	G	G	G	G	G	G	NADH dehydrogenase I chain J
STM3186	3349998	1425	A	A	G	G	G	G	G	G	outer membrane channel
STM2198	2295764	587	G	G	G	A	G	G	G	G	putative regulatory protein
STM2198	2296490	1313	A	A	G	G	G	G	G	G	putative regulatory protein
STM1988	2071431	187	T	C	T	T	T	T	T	T	putative cytoplasmic protein
STM4086	4293966	390	A	G	G	G	G	G	G	G	glycerol kinase
STM1122	1207002	520	C	C	T	C	C	C	C	C	putative transcriptional repressor (TetR/AcrR family)
STM1122	1207107	625	T	T	T	T	T	T	T	G	putative transcriptional repressor (TetR/AcrR family)
STM2167	2265131	1409	A	A	A	G	A	A	A	A	NADH independent D-lactate dehydrogenase
STM0263	302800	73	T	C	C	C	C	C	C	C	RNase HI
STM0585	641547	15	G	G	A	G	G	G	G	G	outer membrane porin, receptor for ferric enterobactin (enterochelin) and colicins B and D
STM3658	3843759	390	C	C	C	C	C	A	C	A	putative inner membrane protein
STM1285	1360917	903	G	G	A	G	G	G	G	G	putative Ser protein kinase
STM1641	1728467	2862	G	G	G	A	A	A	A	A	ATP-dependent helicase
STM1327	1406325	39	C	C	C	C	C	T	C	C	putative salt-induced outer membrane protein
STM2391	2502912	658	G	G	G	G	G	G	A	G	transport of long-chain fatty acids
STM4380	4622750	548	A	A	A	C	C	C	C	C	putative hydrolase of the alpha/beta superfamily
STM1368	1449655	879	C	C	C	A	C	C	C	C	putative Na+-dicarboxylate symporter
STM2267	2364392	1051	C	C	C	C	C	C	T	C	outer membrane protein 1b (ib;c)
STM3928	4137964	847	G	A	G	G	G	G	G	G	TDP-Fuc4NAc:lipidII transferase
STM0863	936265	786	C	C	C	C	C	T	C	T	D-alanyl-D-alanine carboxypeptidase; penicillin-binding protein 6a
STM1953	2041691	357	T	-	C	C	C	C	C	C	putative 1-cyclopropane-carboxylate deaminase
STM1947	2037616	629	C	C	C	C	T	C	C	C	putative LuxR/UhpA family response regulator
STM1237	1323030	509	T	T	T	C	C	C	C	C	putative ribosomal large subunit pseudouridine synthase
STM0974	1057410	32	G	G	T	G	G	G	G	G	formate transporter
STM0316	359684	1291	G	G	G	A	A	A	A	A	aminoacyl-histidine dipeptidase (peptidase D)
STM3620	3803019	457	A	G	G	G	G	G	G	G	putative ATPase involved in chromosome partitioning
STM3620	3802793	683	G	G	G	T	T	T	T	T	putative ATPase involved in chromosome partitioning
STM1061	1151269	1398	T	T	C	C	C	C	C	C	putative N6-adenine-specific DNA methylase
STM1125	1212614	711	C	C	T	C	C	C	C	C	SSS family major sodium/proline symporter
STM1887	1981624	144	G	G	A	G	G	G	G	G	putative transcriptional regulator
STM1094	1180418	209	C	A	C	C	C	C	C	C	Pathogenicity island encoded protein: SPI5
STM1295	1372226	676	C	C	C	C	T	C	C	C	protease IV
STM2486	2600963	147	C	C	C	T	T	T	T	T	putative inner membrane protein
STM1597	1686604	225	G	A	G	G	G	G	G	G	putative aldehyde dehydrogenase
STM1597	1685522	1307	A	A	A	A	G	A	A	A	putative aldehyde dehydrogenase
STM2867	3011821	294	C	C	T	C	C	C	C	C	araC family bacterial regulatory helix-turn-helix protein
STM0359	408588	45	G	G	G	T	G	G	G	G	putative cytoplasmic protein
STM0686	747739	328	C	C	C	C	C	C	A	C	glutamine tRNA synthetase
STM0686	747779	368	A	A	T	T	T	T	T	T	glutamine tRNA synthetase
STM0086	98903	139	T	T	T	T	C	T	T	T	CPA2 family K+ efflux antiporter, glutathione-regulated
STM0086	100299	1535	C	C	C	T	T	T	T	T	CPA2 family K+ efflux antiporter, glutathione-regulated
STM0691	752703	1153	C	C	C	-	T	C	C	C	putative periplasmic protein
STM3748	3943372	607	C	C	C	C	C	C	A	C	putative inner membrane protein
STM3704	3898086	523	A	G	G	G	G	G	G	G	phosphoglyceromutase
STM0983	1068747	620	A	A	A	A	A	A	A	T	putative recombination protein
STM1199	1282671	70	T	T	T	T	T	G	T	G	putative periplasmic solute-binding protein
STM2994	3145495	620	T	T	T	T	T	C	T	C	exonuclease V, beta chain
STM3481	3635470	786	T	T	T	T	T	C	T	C	tryptophan tRNA synthetase
STM2572	2717766	190	T	T	T	T	T	G	T	G	putative ABC superfamily transport protein
STM2572	2718395	819	A	A	G	G	G	G	G	G	putative ABC superfamily transport protein
STM4119	4334355	912	C	C	C	C	C	T	C	T	phosphoenolpyruvate carboxylase
STM2996	3150692	2027	C	C	C	C	C	T	C	T	exonuclease V, subunit
STM1155	1242033	573	C	C	C	T	T	T	T	T	lauroyl/myristoyl acyltransferase involved in lipid A biosynthesis
STM2818	2965806	1134	C	C	C	A	A	A	A	A	gamma-glutamate-cysteine ligase
STM2801	2948459	355	C	C	C	C	C	C	A	C	putative cytoplasmic protein
STM3089	3251334	11	C	C	T	C	C	C	C	C	putative inner membrane protein
STM2896	3038238	170	T	T	T	G	T	T	T	T	invasion protein
STM1981	2066494	163	G	G	G	A	A	A	A	A	putative flagellar biosynthetic protein
STM0131	153455	81	T	T	T	T	C	C	C	C	cell division protein
STM4267	4505155	17	G	G	G	G	A	G	G	G	putative glutathione S-transferase
STM0549	610024	236	C	C	C	C	C	C	T	C	fimbrial protein Z
STM3606	3778915	566	C	C	C	C	T	C	C	C	putative transcriptional regulator
STM0617	679387	606	C	C	T	C	C	C	C	C	RNase I
STM2285	2392756	917	A	C	C	C	C	C	C	C	sn-glycerol-3-phosphate dehydrogenase (anaerobic), membrane anchor subunit
STM3201	3362572	1476	T	C	C	C	C	C	C	C	adenylyl transferase for glutamine synthetase
STM3201	3362085	1963	C	C	C	C	C	C	T	C	adenylyl transferase for glutamine synthetase
STM3867	4076049	399	C	C	C	C	C	C	T	C	membrane-bound ATP synthase, F1 sector, alpha-subunit
STM1767	1866337	286	A	T	T	T	T	T	T	T	response regulator in two-component regulatory system with NarX (or NarQ)
STM0652	715343	803	A	A	A	G	A	A	A	A	putative sigma-54 dependent transcriptional regulator
STM4472	4714173	237	T	T	C	T	T	T	T	T	putative inner membrane protein
STM1949	2039480	128	A	A	G	G	G	G	G	G	putative cytoplasmic protein
STM3628	3812226	121	C	C	T	C	C	C	C	C	dipeptide transport protein 2
STM0683	742782	139	C	C	C	C	A	C	C	C	N-acetylglucosamine-6-phosphate deacetylase
STM0978	1063435	799	T	C	C	C	C	C	C	C	3-enolpyruvylshikimate-5-phosphate synthetase
STM1725	1822824	1182	G	A	G	G	G	G	G	G	N-(5-phosphoribosyl)anthranilate isomerase
STM3707	3900335	1032	G	G	G	G	G	G	T	G	putative glycosyltransferase
STM0631	693951	310	C	T	C	C	C	C	C	C	putative hydrolase
STM0952	1029523	181	A	G	A	A	A	A	-	A	putative transcriptional regulator, lysR family
STM1731	1827289	371	G	G	A	G	G	G	G	G	putative catalase
STM0190	221460	550	C	C	T	C	C	C	C	C	transpeptidase of penicillin-binding protein 1b
STM4295	4537263	392	T	T	T	T	T	T	C	T	transcriptional activator of adiA
STM1846	1942951	249	C	G	C	C	C	C	C	C	activator of proP
STM0494	553826	203	G	G	G	G	G	T	G	T	UDP-sugar hydrolase 5'-nucleotidase
STM0494	554359	736	T	A	T	T	T	T	T	T	UDP-sugar hydrolase 5'-nucleotidase
STM1480	1558124	909	C	C	C	T	C	C	C	C	pyridine nucleotide transhydrogenase, beta subunit
STM0120	140496	109	T	C	C	C	C	C	C	C	putative S-adenosyl methionine adenyltransferase
STM4130	4348204	96	C	C	C	C	C	T	C	T	outer membrane receptor for transport of vitamin B12, E colicins, and bacteriophage BF23
STM3009	3166286	398	A	A	A	A	A	A	A	G	putative efflux protein
STM1077	1168419	647	A	A	A	A	T	A	A	A	putative periplasmic protein
STM1225	1310302	872	G	G	A	A	A	A	A	A	spermidine/putrescine transporter
STM1234	1320680	900	A	A	G	G	G	G	G	G	tRNA (5-methylaminomethyl-2-thiouridylate)-methyltransferase
STM4037	4242499	2273	G	G	G	G	G	G	T	G	formate dehydrogenase [transl_except=(pos:586..588,aa:Sec)
STM0092	103459	1012	C	C	C	C	C	C	T	C	peptidyl-prolyl cis-trans isomerase
STM3114	3271663	1118	A	A	C	A	A	A	A	A	ornithine decarboxylase isozyme
STM4087	4294956	929	A	A	G	G	G	G	G	G	glycerol diffusion MIP channel
STM2581	2724294	535	G	G	G	G	G	G	A	G	RNase III, ds RNA
STM2275	2379623	282	G	-	A	G	G	G	G	G	putative gntR family regulatory protein
STM1849	1946267	413	T	C	C	C	C	C	C	C	putative inner membrane protein
STM2272	2372931	780	C	C	C	T	T	T	T	T	DNA gyrase, subunit A
STM0828	894438	308	T	T	T	C	C	C	C	C	glutamine high-affinity transporter
STM0309	350587	2012	C	C	C	-	C	T	C	C	putative acyl-CoA dehydrogenase
STM3378	3549490	397	A	A	G	G	G	G	G	G	putative inner membrane protein
STM1328	1406562	548	C	C	C	T	T	T	T	T	putative outer membrane protein
STM1328	1406389	721	G	G	G	G	A	G	G	G	putative outer membrane protein
STM2077	2155959	607	A	A	A	G	G	G	G	G	imidazole glycerol phosphate synthase
STM1207	1291553	426	C	C	C	C	C	C	T	C	putative outer membrane lipoprotein
STM1626	1715101	773	C	C	C	C	A	C	C	C	methyl-accepting chemotaxis protein III
STM3376	3547743	737	G	G	G	G	A	G	G	G	putative oxidoreductase
STM1142	1229477	241	C	C	C	T	T	T	T	T	putative transcriptional regulator
STM1801	1900653	867	T	T	T	T	T	T	T	A	putative CPA1 family Na:H transport protein
STM1560	1640238	473	G	G	A	G	G	G	G	G	putative alpha amylase
STM1695	1787417	266	G	G	T	G	G	G	G	G	ABC superfamily peptide transport protein
STM0509	570287	570	A	A	G	G	G	G	G	G	putative outer membrane protein
STM3630	3814293	142	G	G	G	G	G	A	G	A	dipeptide transport protein
STM3630	3813040	1395	G	G	G	G	G	A	G	A	dipeptide transport protein
STM1717	1814587	236	C	C	A	C	C	C	C	C	putative oxoacyl-(acyl carrier protein) reductase
STM3377	3548400	309	A	A	G	A	A	A	A	A	putative nitrate reductase
STM4293	4533940	461	G	G	A	G	G	G	G	G	putative integral membrane protein
STM0353	399607	1054	C	C	C	-	C	C	T	C	putative cation transport ATPase
STM0353	399608	1055	G	G	G	-	G	G	A	G	putative cation transport ATPase
STM2142	2237112	856	G	A	G	G	G	G	G	G	putative MFS family transport protein
STM3786	3985335	213	G	A	G	G	G	G	G	G	putative inner membrane protein
STM2070	2147904	525	G	G	G	C	G	G	G	G	putative dehydratase
STM2954	3100224	394	C	C	C	C	C	T	C	C	putative pyrophosphatase
STM0750	818592	774	G	G	T	G	G	G	G	G	putative periplasmic protein
STM4006	4213453	836	C	C	C	T	T	T	T	T	sensory kinase (phosphatase) in two-component regulatory system with GlnG (nitrogen regulator II, NRII)
STM1470	1545011	382	G	G	G	A	A	A	A	A	replication termination protein
STM4053	4264645	62	G	G	G	G	G	G	G	A	putative C4-dicarboxylate transport system
STM1574	1655996	808	C	C	A	C	C	C	C	C	methyl viologen resistance protein
STM3152	3313185	1147	A	A	A	G	A	A	A	A	putative methyl-accepting chemotaxis protein
STM3736	3927615	832	C	C	C	C	C	T	C	C	putative LysR family transcriptional regulator
STM1490	1566383	709	G	G	A	G	G	G	G	G	putative chloride channel protein
STM3493	3649009	2373	C	C	C	T	T	T	T	T	transpeptidase of penicillin-binding protein 1a
STM3922	4132207	532	T	T	C	C	C	C	C	C	dTDP-glucose 4,6-dehydratase
STM0041	47513	860	G	-	G	G	A	A	A	A	putative glycosyl hydrolase
STM1559	1636924	1262	A	A	A	A	C	A	A	A	putative glycosyl hydrolase
STM1556	1633972	706	C	C	C	C	T	C	C	C	putative Na+/H+ antiporter
STM1385	1469818	607	A	C	A	A	A	A	A	A	tetrathionate reductase complex, subunit B
STM0352	395947	1112	T	C	T	T	T	T	T	T	putative cation efflux pump
STM3723	3917635	237	C	T	C	C	C	C	C	C	lipopolysaccharide core biosynthesis protein
STM4469	4711745	21	T	-	T	T	C	T	T	T	ornithine carbamoyltransferase 1
STM3495	3650365	182	C	C	C	T	C	C	C	C	putative inner membrane protein
STM2415	2529494	669	C	C	C	C	C	C	A	C	glutamate tRNA synthetase, catalytic subunit
STM3617	3797041	390	T	T	T	T	C	T	T	T	endo-1,4-D-glucanase
STM1284	1359452	959	G	G	G	T	T	T	T	T	putative cytoplasmic protein
STM3077	3238705	53	A	A	A	G	G	G	G	G	putative Zn-dependent proteases with possible chaperone function
STM3872	4079815	375	G	G	G	T	G	G	G	G	membrane-bound ATP synthase subunit, F1-F0-type proton-ATPase
STM3465	3614754	188	G	G	G	A	G	G	G	G	putative inner membrane protein
STM0969	1051622	658	A	G	G	G	G	G	G	G	putative APC family, amino-acid transporter
STM0648	708226	903	G	G	G	G	T	G	G	G	leucine tRNA synthetase
STM3708	3902335	560	G	G	G	A	G	G	G	G	threonine 3-dehydrogenase
STM1885	1977097	522	T	G	G	G	G	G	G	G	6-phosphogluconate dehydratase
STM3967	4173223	584	A	T	A	A	A	A	A	A	putative dienelactone hydrolase family
STM0002_thrA	1228	904	T	T	T	C	C	C	C	C	aspartokinase I
STM2206	2305841	383	C	C	T	C	C	C	C	C	phosphoenolpyruvate-dependent sugar phosphotransferase system, EIIA 2
STM2206	2305779	445	A	C	C	C	C	C	C	C	phosphoenolpyruvate-dependent sugar phosphotransferase system, EIIA 2
STM2206	2305494	730	A	A	A	G	G	G	G	G	phosphoenolpyruvate-dependent sugar phosphotransferase system, EIIA 2
STM0374	428566	390	G	G	G	-	G	G	G	T	putative inner membrane protein
STM0374	428567	391	A	A	A	-	A	A	A	C	putative inner membrane protein
STM4246	4467942	1354	A	A	A	G	G	G	G	G	putative replicative DNA helicase
STM0546	607645	1607	C	C	T	C	C	C	C	C	outer membrane usher protein
STM3899	4105495	1382	C	C	T	C	C	C	C	C	putative magnesium chelatase, subunit ChlI
STM0651	713685	164	T	G	T	T	T	T	T	T	putative permease
STM1109	1196390	75	C	G	G	G	G	G	G	G	putative periplasmic protein
STM3496	3652758	379	T	C	C	C	C	C	C	C	putative hydrolase
STM3955	4159414	663	G	G	G	G	G	G	A	G	chloramphenicol resistance
STM4566	4819498	142	C	C	C	A	C	C	C	C	putative cytoplasmic protein
STM1370	1453202	531	C	C	T	C	C	C	C	C	putative ABC transporter
STM3841	4046241	69	T	T	C	C	C	C	C	C	putative inner membrane protein
STM1877	1970455	79	G	G	G	G	G	G	A	G	putative amidohydrolase
STM1850	1949897	1340	G	G	G	G	G	A	G	G	putative rRNA methyltransferase
STM1148	1233644	165	T	C	C	C	C	C	C	C	putative phospholipase
STM0222	260373	260	C	C	C	T	T	T	T	T	CDP-diglyceride synthase
STM3135	3296455	374	G	G	G	G	G	T	G	T	putative mannonate hydrolase
STM3135	3296853	772	A	C	C	C	C	C	C	C	putative mannonate hydrolase
STM2427	2537636	1365	A	A	A	A	A	A	A	G	DNA ligase

## Sheet: ST1499_snps_annotated
locus	chrpos	genepos	N16_2207	N14_1267	N15_1496	N14_1527	N15_2048	sal644	N16_0208	N14_1962	N14_0646	Protein_Product
STM3369	3535590	358	T	C	C	C	C	C	C	C	C	putative protease
STM3369	3535297	651	A	A	A	A	C	A	A	A	A	putative protease
STM0436	487657	700	C	C	C	T	C	C	C	C	C	IS903 transposase
STM3704	3898086	523	A	G	G	G	G	G	G	G	G	phosphoglyceromutase
STM1265	1347548	37	G	G	A	G	G	G	G	G	G	putative response regulators
STM2228	2329110	210	A	A	A	G	G	G	G	G	G	putative hydrolase of alkaline phosphatase superfamily
STM1164	1249438	218	C	C	C	C	C	T	T	T	T	putative outer membrane lipoprotein
STM3620	3803019	457	A	G	G	G	G	G	G	G	G	putative ATPase involved in chromosome partitioning
STM2319	2429389	110	C	C	C	C	C	T	T	T	T	NADH dehydrogenase I chain K
STM1395	1482264	398	G	G	G	T	T	T	T	T	T	secretion system apparatus protein
STM1395	1482442	576	C	C	C	T	C	C	C	C	C	secretion system apparatus protein
STM1598	1688279	110	G	A	G	G	G	-	G	G	G	putative gntR family regulatory protein
STM1598	1687778	611	T	C	C	C	C	-	C	C	C	putative gntR family regulatory protein
STM2337	2448723	797	C	C	C	C	C	T	T	T	T	acetate kinase A
STM2337	2449026	1100	A	A	A	G	G	G	G	G	G	acetate kinase A
STM4003	4210557	78	G	G	G	G	A	A	A	A	A	putative cytoplasmic protein
STM0258	298266	26	C	C	C	T	T	T	T	T	T	putative cytoplasmic protein
STM0258	298270	30	A	A	A	G	G	G	G	G	G	putative cytoplasmic protein
STM0258	298285	45	A	A	A	C	C	C	C	C	C	putative cytoplasmic protein
STM0258	298303	63	T	T	T	C	C	C	C	C	C	putative cytoplasmic protein
STM0258	298331	91	T	T	T	C	C	C	C	C	C	putative cytoplasmic protein
STM0258	298453	213	C	C	C	G	A	A	A	A	A	putative cytoplasmic protein
STM0258	298537	297	C	C	C	T	T	T	T	T	T	putative cytoplasmic protein
STM0258	298558	318	G	G	G	T	T	T	T	T	T	putative cytoplasmic protein
STM0258	298730	490	C	C	C	T	T	T	T	T	T	putative cytoplasmic protein
STM0258	298747	507	C	C	C	T	C	C	C	C	C	putative cytoplasmic protein
STM0258	298807	567	T	T	T	C	C	C	C	C	C	putative cytoplasmic protein
STM0258	298879	639	A	A	A	G	G	G	G	G	G	putative cytoplasmic protein
STM0428	480970	55	A	A	A	A	A	A	G	A	A	2-aminoethylphosphonate transporter ATPase component
STM0496	555467	621	G	G	G	G	G	G	A	G	G	putative cytoplasmic protein
STM3930	4139492	68	T	T	T	T	C	T	T	T	T	putative APC family amino-acid transport protein
STM0260	299241	684	G	G	G	A	A	A	A	A	A	transcriptional regulator for nitrite reductase (cytochrome c552)
STM0260	299235	690	G	G	G	A	A	A	A	A	A	transcriptional regulator for nitrite reductase (cytochrome c552)
STM0260	298794	1131	G	G	G	A	A	A	A	A	A	transcriptional regulator for nitrite reductase (cytochrome c552)
STM0260	298766	1159	G	G	G	C	G	G	G	G	G	transcriptional regulator for nitrite reductase (cytochrome c552)
STM0260	298746	1179	A	A	A	G	G	G	G	G	G	transcriptional regulator for nitrite reductase (cytochrome c552)
STM0260	298638	1287	T	T	T	C	C	C	C	C	C	transcriptional regulator for nitrite reductase (cytochrome c552)
STM1411	1491975	402	A	A	A	G	G	G	G	G	G	secretion system apparatus protein
STM0624	685635	935	T	T	T	T	T	T	A	A	A	citrate lyase synthetase (citrate (pro-3S)-lyase ligase
STM3219	3387737	1488	G	G	G	G	A	G	G	G	G	2,4-dieonyl-coa reductase
STM3219	3388005	1756	G	G	G	G	T	G	G	G	G	2,4-dieonyl-coa reductase
STM1736	1830963	171	A	A	A	G	A	A	A	A	A	putative Acyl-CoA hydrolase
STM4381	4622317	645	C	C	C	C	C	T	T	T	T	putative transcriptional repressor
STM0509	570287	570	A	A	G	G	G	G	G	G	G	putative outer membrane protein
STM3524	3686892	420	C	C	C	T	T	T	T	T	T	protein of glp regulon
STM1122	1207002	520	C	C	T	C	C	C	C	C	C	putative transcriptional repressor (TetR/AcrR family)
STM0811	875637	517	C	C	C	T	C	C	C	C	C	putative negative regulator
STM4295	4537388	267	A	A	A	A	C	A	A	A	A	transcriptional activator of adiA
STM2521	2654027	211	G	G	G	G	G	A	A	A	A	putative inner membrane protein
STM0312	356627	185	T	T	T	T	C	C	C	C	C	putative periplasmic protein
STM0312	356564	248	C	C	C	T	C	C	C	C	C	putative periplasmic protein
STM0312	356552	260	G	G	G	A	G	G	G	G	G	putative periplasmic protein
STM0312	356498	314	C	C	C	T	C	C	C	C	C	putative periplasmic protein
STM0312	356495	317	T	T	T	C	T	T	T	T	T	putative periplasmic protein
STM0312	356283	529	G	G	G	A	G	G	G	G	G	putative periplasmic protein
STM0312	356231	581	A	A	A	T	A	A	A	A	A	putative periplasmic protein
STM1415	1495927	254	G	G	G	T	G	G	G	G	G	secretion system apparatus protein
STM1415	1496019	346	C	C	G	C	C	C	C	C	C	secretion system apparatus protein
STM2320	2429699	99	A	G	G	G	G	G	G	G	G	NADH dehydrogenase I chain J
STM0364	412717	54	C	C	C	T	C	C	C	C	C	ferrioxamine receptor
STM0364	412749	86	T	T	T	T	C	C	C	C	C	ferrioxamine receptor
STM0364	412939	276	C	C	C	T	C	C	C	C	C	ferrioxamine receptor
STM0364	412948	285	C	C	C	T	C	C	C	C	C	ferrioxamine receptor
STM0364	412960	297	C	C	C	T	C	C	C	C	C	ferrioxamine receptor
STM0364	413041	378	T	T	T	C	C	C	C	C	C	ferrioxamine receptor
STM0364	413153	490	T	T	T	G	G	G	G	G	G	ferrioxamine receptor
STM0364	413216	553	A	A	A	C	C	C	C	C	C	ferrioxamine receptor
STM0364	413293	630	T	T	T	C	C	C	C	C	C	ferrioxamine receptor
STM0364	413428	765	C	C	C	T	T	T	T	T	T	ferrioxamine receptor
STM0364	413480	817	A	A	A	G	G	G	G	G	G	ferrioxamine receptor
STM0364	414226	1563	T	T	T	C	C	C	C	C	C	ferrioxamine receptor
STM0364	414265	1602	A	A	A	C	C	C	C	C	C	ferrioxamine receptor
STM0364	414334	1671	G	G	G	T	T	T	T	T	T	ferrioxamine receptor
STM0364	414436	1773	T	T	T	G	G	G	G	G	G	ferrioxamine receptor
STM0364	414673	2010	T	T	T	C	C	C	C	C	C	ferrioxamine receptor
STM0802	871506	875	T	T	T	A	A	A	A	A	A	molybdopterin biosynthesis, protein A
STM2449	2559467	228	C	C	T	T	T	T	T	T	T	putative acetyltransferase
STM0537	600402	1277	A	A	A	G	A	A	A	A	A	cysteine tRNA synthetase
STM4058	4268139	251	G	G	G	G	T	G	G	G	G	sensory kinase in two-component regulatory system with CpxR
STM2128	2218938	305	C	C	C	A	A	A	A	A	A	putative resistance protein
STM2128	2219641	1008	A	A	A	A	A	T	T	T	T	putative resistance protein
STM1156	1243888	159	G	G	G	G	A	G	G	G	G	putative enzyme related to sulfur transferases
STM1156	1244314	585	A	G	A	A	A	A	A	A	A	putative enzyme related to sulfur transferases
STM0691	752820	1036	C	C	C	C	C	T	C	C	C	putative periplasmic protein
STM0387	440253	60	A	A	A	A	A	A	G	A	A	putative cytoplasmic protein
STM2350	2461226	53	T	T	T	T	T	T	C	C	C	putative sugar nucleotide epimerase
STM2350	2461822	649	A	A	A	A	C	A	A	A	A	putative sugar nucleotide epimerase
STM4439	4683526	245	C	C	C	T	T	T	T	T	T	cytochrome b(562)
STM4587	4844051	364	G	G	G	A	A	A	A	A	A	putative periplasmic protein
STM2112	2194994	82	C	C	C	C	C	C	A	C	C	putative colanic acid polymerase
STM1261	1345331	32	A	A	A	A	A	G	G	G	G	putative cytoplasmic protein
STM2186	2281511	133	C	C	C	C	C	A	A	A	A	putative NADPH-dependent glutamate synthase beta chain or related oxidoreductase
STM2186	2282508	1130	A	A	A	C	A	A	A	A	A	putative NADPH-dependent glutamate synthase beta chain or related oxidoreductase
STM1875	1969434	106	C	C	C	T	C	C	C	C	C	similar Cu resistance protein CopC
STM0666	729864	312	C	C	C	A	C	C	C	C	C	apolipoprotein N-acyltransferase
STM0608	670429	80	A	A	A	A	G	A	A	A	A	alkyl hydroperoxide reductase, C22 subunit
STM0359	408632	89	G	G	G	A	G	G	G	G	G	putative cytoplasmic protein
STM0156	182691	352	A	A	A	G	A	A	A	A	A	putative periplasmic protein
STM2218	2319433	318	A	A	A	A	A	A	A	G	A	putative ABC-type dipeptide/oligopeptide/nickel transport systems, permease component
STM4511	4764318	767	T	C	T	T	T	T	T	T	T	putative LysR family transcriptional regulator
STM0215	252849	205	T	T	T	C	C	C	C	C	C	methionine aminopeptidase
STM0215	252828	226	C	C	C	C	T	T	T	T	T	methionine aminopeptidase
STM0215	252795	259	A	A	A	G	G	G	G	G	G	methionine aminopeptidase
STM0215	252779	275	C	C	C	C	T	T	T	T	T	methionine aminopeptidase
STM0215	252711	343	A	A	A	G	G	G	G	G	G	methionine aminopeptidase
STM3328	3489235	1265	A	A	A	A	A	T	T	T	T	sensory histidine kinase in two-component regulatory system with ArcA
STM0478	536184	1656	T	T	T	T	T	T	T	T	C	putative small-conductance mechanosensitive channel
STM1780	1877721	35	T	T	T	T	C	T	T	T	T	phosphoribosylpyrophosphate synthetase
STM3748	3943251	486	T	T	T	T	T	G	T	T	T	putative inner membrane protein
STM3748	3944270	1505	G	G	G	G	G	T	T	T	T	putative inner membrane protein
STM0226	265534	144	G	G	G	G	A	A	A	A	A	UDP-3-O-(3-hydroxymyristoyl)-glucosamine n-acyltransferase
STM0226	265612	222	T	T	T	T	C	C	C	C	C	UDP-3-O-(3-hydroxymyristoyl)-glucosamine n-acyltransferase
STM0226	265618	228	C	C	C	T	C	C	C	C	C	UDP-3-O-(3-hydroxymyristoyl)-glucosamine n-acyltransferase
STM0226	265714	324	C	C	C	C	T	T	T	T	T	UDP-3-O-(3-hydroxymyristoyl)-glucosamine n-acyltransferase
STM4472	4714338	72	T	T	T	C	C	C	C	C	C	putative inner membrane protein
STM4472	4714173	237	T	T	C	T	T	T	T	T	T	putative inner membrane protein
STM1725	1822824	1182	G	A	G	G	G	G	G	G	G	N-(5-phosphoribosyl)anthranilate isomerase
STM1121	1206257	72	T	T	T	T	T	G	T	T	T	putative cytoplasmic protein
STM1121	1206266	81	T	T	T	T	T	G	T	T	T	putative cytoplasmic protein
STM1121	1206291	106	A	A	A	A	A	T	A	A	A	putative cytoplasmic protein
STM1121	1206308	123	T	T	T	T	T	G	T	T	T	putative cytoplasmic protein
STM1121	1206335	150	C	C	C	C	C	A	C	C	C	putative cytoplasmic protein
STM1850	1949072	515	C	C	C	A	A	A	A	A	A	putative rRNA methyltransferase
STM1151	1239438	1504	T	T	T	C	C	C	C	C	C	membrane glycosyltransferase
STM1714	1809050	737	A	A	A	A	A	A	G	A	A	DNA topoisomerase type I, omega protein
STM2668	2809132	250	T	T	T	T	T	C	C	C	C	putative cytoplasmic protein
STM2668	2808994	388	G	G	G	G	G	T	G	G	G	putative cytoplasmic protein
STM4100	4310727	1017	C	C	C	T	C	C	C	C	C	cystathionine gamma-synthase
STM3618	3797881	663	G	G	G	G	G	G	G	G	A	putative cellulose synthase
STM1731	1827289	371	G	G	A	G	G	G	G	G	G	putative catalase
STM1500	1579361	180	G	G	G	G	G	A	G	G	G	putative outer membrane protein
STM1486	1562439	256	C	C	C	C	C	C	C	C	T	putative MFS familty transport protein
STM3375	3544276	599	C	C	C	C	T	C	C	C	C	putative diguanylate cyclase
STM3375	3544225	650	A	A	A	G	A	A	A	A	A	putative diguanylate cyclase
STM0006	4586	1381	G	G	A	G	G	G	G	G	G	putative alanine/glycine transport protein
STM1383	1465372	975	G	A	G	G	G	G	G	G	G	tetrathionate reductase complex, subunit A
STM1383	1463851	2496	A	A	A	C	C	C	C	C	C	tetrathionate reductase complex, subunit A
STM0994	1080247	47	G	G	G	G	G	A	A	A	A	kinesin-line cell division protein involved in sister chromosome partitioning
STM0243	284137	161	A	A	A	G	G	G	G	G	G	putative regulator
STM0243	283885	413	C	C	C	T	C	C	C	C	C	putative regulator
STM0243	283825	473	A	A	A	G	G	G	G	G	G	putative regulator
STM0243	283619	679	G	G	G	A	A	A	A	A	A	putative regulator
STM0243	283617	681	A	A	A	A	T	T	T	T	T	putative regulator
STM0243	283615	683	T	T	T	C	G	G	G	G	G	putative regulator
STM0957	1032821	531	C	C	C	C	T	T	T	T	T	cytochrome-related transporter
STM2206	2305841	383	C	C	T	C	C	C	C	C	C	phosphoenolpyruvate-dependent sugar phosphotransferase system, EIIA 2
STM2206	2305779	445	A	C	C	C	C	C	C	C	C	phosphoenolpyruvate-dependent sugar phosphotransferase system, EIIA 2
STM0204	240261	142	C	C	C	T	C	C	C	C	C	putative HesB-like domain protein
STM0204	240329	210	T	T	T	T	G	G	G	G	G	putative HesB-like domain protein
STM0204	240416	297	A	A	A	C	A	A	A	A	A	putative HesB-like domain protein
STM0204	240431	312	T	T	T	C	T	T	T	T	T	putative HesB-like domain protein
STM0204	240503	384	C	C	C	T	C	C	C	C	C	putative HesB-like domain protein
STM2958	3107965	1450	T	T	T	C	C	C	C	C	C	sensory histidine kinase
STM0313	357881	94	C	C	C	C	T	T	T	T	T	DNA polymerase IV
STM0313	357962	175	T	T	T	C	T	T	T	T	T	DNA polymerase IV
STM0313	357977	190	C	C	C	T	C	C	C	C	C	DNA polymerase IV
STM0313	358001	214	C	C	C	T	C	C	C	C	C	DNA polymerase IV
STM0313	358011	224	C	C	C	T	C	C	C	C	C	DNA polymerase IV
STM0313	358014	227	T	T	T	C	T	T	T	T	T	DNA polymerase IV
STM0313	358151	364	A	A	A	T	A	A	A	A	A	DNA polymerase IV
STM0313	358157	370	A	A	A	G	A	A	A	A	A	DNA polymerase IV
STM0313	358217	430	C	C	C	T	C	C	C	C	C	DNA polymerase IV
STM0313	358280	493	A	A	A	G	A	A	A	A	A	DNA polymerase IV
STM0313	358312	525	A	A	A	A	G	G	G	G	G	DNA polymerase IV
STM0313	358370	583	C	C	C	C	T	T	T	T	T	DNA polymerase IV
STM0313	358414	627	A	A	A	A	G	G	G	G	G	DNA polymerase IV
STM0313	358532	745	T	T	T	C	C	C	C	C	C	DNA polymerase IV
STM0313	358565	778	A	A	A	A	G	G	G	G	G	DNA polymerase IV
STM0313	358592	805	G	G	G	G	A	A	A	A	A	DNA polymerase IV
STM0313	358607	820	A	A	A	G	A	A	A	A	A	DNA polymerase IV
STM0313	358761	974	G	G	G	A	G	G	G	G	G	DNA polymerase IV
STM0313	358826	1039	G	G	G	A	G	G	G	G	G	DNA polymerase IV
STM1929	2024100	594	G	G	G	G	G	A	A	A	A	trehalose-6-phosphate phophatase, biosynthetic
STM1929	2023875	819	A	A	A	A	G	A	A	A	A	trehalose-6-phosphate phophatase, biosynthetic
STM2301	2409387	438	C	C	C	C	T	C	C	C	C	putative melittin resistance protein
STM0937	1012671	296	T	T	T	G	G	G	G	G	G	hybrid cluster protein
STM1279	1356508	343	T	T	T	C	C	C	C	C	C	putative regulator (AraC/XylS family)
STM3152	3313035	1297	A	A	A	G	G	G	G	G	G	putative methyl-accepting chemotaxis protein
STM3159	3319652	365	C	C	C	G	C	C	C	C	C	uptake of enterochelin
STM2209	2309589	47	C	C	C	T	C	C	C	C	C	putative inner membrane protein
STM2281	2386689	160	G	G	G	A	G	G	G	G	G	putative LysR family transcriptional regulator
STM1716	1812234	846	C	C	C	C	C	C	A	C	C	putative peptidase
STM2669	2809802	546	T	T	T	C	C	C	C	C	C	chorismate mutase T
STM2669	2809397	951	G	G	G	G	A	G	G	G	G	chorismate mutase T
STM0144	167505	210	C	C	C	T	C	C	C	C	C	prelipin peptidase dependent protein
STM2477	2586860	229	A	A	A	G	A	A	A	A	A	putative pyrophosphohydrolase
STM1506	1584388	935	C	C	C	T	C	C	C	C	C	putative dehydrogenase
STM0978	1062863	227	T	T	T	C	C	C	C	C	C	3-enolpyruvylshikimate-5-phosphate synthetase
STM0978	1063435	799	T	C	C	C	C	C	C	C	C	3-enolpyruvylshikimate-5-phosphate synthetase
STM2536	2675373	746	C	C	C	T	C	C	C	C	C	putative aminopeptidase
STM4544	4803004	547	G	G	G	G	G	A	G	G	G	primosomal protein I
STM1802	1901519	81	G	G	G	G	A	A	A	A	A	alanine racemase 2
STM0475	528794	457	C	C	C	T	C	C	C	C	C	RND family, acridine efflux pump
STM0408	464411	234	G	G	G	G	A	G	G	G	G	preprotein translocase, IISP family, membrane subunit
STM0989	1076438	831	C	C	C	C	C	A	C	C	C	mukF protein (killing factor KicB)
STM1162	1248094	92	G	G	G	G	G	C	G	G	G	DNA damage-inducible protein I
STM3371	3541191	123	C	C	C	G	G	G	G	G	G	putative inhibitor of septum formation
STM0961	1042116	556	C	C	C	T	C	C	C	C	C	periplasmic protein
STM0203	238706	45	T	T	T	T	C	C	C	C	C	putative ClC family chlorine transport protein
STM0203	238772	111	C	C	C	C	A	A	A	A	A	putative ClC family chlorine transport protein
STM0203	238973	312	C	C	C	T	C	C	C	C	C	putative ClC family chlorine transport protein
STM0203	239016	355	C	C	C	C	T	T	T	T	T	putative ClC family chlorine transport protein
STM0203	239048	387	A	A	A	G	G	G	G	G	G	putative ClC family chlorine transport protein
STM0203	239054	393	A	A	A	G	G	G	G	G	G	putative ClC family chlorine transport protein
STM0203	239063	402	T	T	T	C	C	C	C	C	C	putative ClC family chlorine transport protein
STM0203	239258	597	C	C	C	C	T	T	T	T	T	putative ClC family chlorine transport protein
STM0203	239414	753	A	A	A	A	G	G	G	G	G	putative ClC family chlorine transport protein
STM0203	239475	814	T	T	T	T	C	C	C	C	C	putative ClC family chlorine transport protein
STM0203	239676	1015	G	G	G	A	A	A	A	A	A	putative ClC family chlorine transport protein
STM0203	239684	1023	T	T	T	G	G	G	G	G	G	putative ClC family chlorine transport protein
STM0203	239690	1029	G	G	G	A	A	A	A	A	A	putative ClC family chlorine transport protein
STM0203	240052	1391	A	A	A	G	A	A	A	A	A	putative ClC family chlorine transport protein
STM1109	1196390	75	C	G	G	G	G	G	G	G	G	putative periplasmic protein
STM1094	1180418	209	C	A	C	C	C	C	C	C	C	Pathogenicity island encoded protein: SPI5
STM0322	367598	181	T	T	T	T	C	C	C	C	C	gamma-glutamylphosphate reductase
STM0322	367629	212	A	A	A	G	G	G	G	G	G	gamma-glutamylphosphate reductase
STM0322	367743	326	A	A	A	C	C	C	C	C	C	gamma-glutamylphosphate reductase
STM0322	367748	331	A	A	A	G	A	A	A	A	A	gamma-glutamylphosphate reductase
STM0322	367868	451	G	G	G	A	A	A	A	A	A	gamma-glutamylphosphate reductase
STM0322	367875	458	T	T	T	C	C	C	C	C	C	gamma-glutamylphosphate reductase
STM0322	367916	499	G	G	G	A	G	G	G	G	G	gamma-glutamylphosphate reductase
STM0322	367940	523	G	G	G	A	G	G	G	G	G	gamma-glutamylphosphate reductase
STM0322	367970	553	C	C	C	T	C	C	C	C	C	gamma-glutamylphosphate reductase
STM0322	368117	700	T	T	T	C	T	T	T	T	T	gamma-glutamylphosphate reductase
STM0322	368156	739	T	T	T	C	T	T	T	T	T	gamma-glutamylphosphate reductase
STM0322	368159	742	T	T	T	C	T	T	T	T	T	gamma-glutamylphosphate reductase
STM0322	368249	832	G	G	G	G	A	A	A	A	A	gamma-glutamylphosphate reductase
STM0322	368276	859	G	G	G	A	G	G	G	G	G	gamma-glutamylphosphate reductase
STM0322	368349	932	A	A	A	G	G	G	G	G	G	gamma-glutamylphosphate reductase
STM0322	368391	974	G	G	G	A	G	G	G	G	G	gamma-glutamylphosphate reductase
STM0322	368418	1001	G	G	G	G	A	A	A	A	A	gamma-glutamylphosphate reductase
STM0322	368420	1003	T	T	T	C	C	C	C	C	C	gamma-glutamylphosphate reductase
STM0322	368438	1021	T	T	T	T	C	C	C	C	C	gamma-glutamylphosphate reductase
STM0322	368456	1039	G	G	G	C	G	G	G	G	G	gamma-glutamylphosphate reductase
STM0322	368466	1049	A	A	A	T	T	T	T	T	T	gamma-glutamylphosphate reductase
STM0322	368549	1132	T	T	T	C	C	C	C	C	C	gamma-glutamylphosphate reductase
STM0322	368651	1234	C	C	C	A	C	C	C	C	C	gamma-glutamylphosphate reductase
STM0775	839046	482	C	C	C	C	C	C	T	C	C	galactose-1-phosphate uridylyltransferase
STM1705	1799925	83	G	G	G	A	G	G	G	G	G	osmotically inducible lipoprotein
STM0210	246261	201	C	C	C	T	T	T	T	T	T	putative inner membrane protein
STM0210	246265	205	G	G	G	A	A	A	A	A	A	putative inner membrane protein
STM0210	246321	261	C	C	C	T	T	T	T	T	T	putative inner membrane protein
STM0210	246351	291	T	T	T	C	C	C	C	C	C	putative inner membrane protein
STM0210	246354	294	T	T	T	C	C	C	C	C	C	putative inner membrane protein
STM0210	246423	363	A	A	A	G	G	G	G	G	G	putative inner membrane protein
STM0210	246468	408	T	T	T	C	C	C	C	C	C	putative inner membrane protein
STM0210	246705	645	A	A	A	G	G	G	G	G	G	putative inner membrane protein
STM0210	246726	666	C	C	C	G	G	G	G	G	G	putative inner membrane protein
STM0210	246858	798	C	C	C	C	T	T	T	T	T	putative inner membrane protein
STM0210	246879	819	C	C	C	C	T	T	T	T	T	putative inner membrane protein
STM0210	246903	843	A	A	A	A	G	G	G	G	G	putative inner membrane protein
STM0210	246910	850	G	G	G	G	C	C	C	C	C	putative inner membrane protein
STM0210	246912	852	G	G	G	G	A	A	A	A	A	putative inner membrane protein
STM0210	246951	891	C	C	C	T	T	T	T	T	T	putative inner membrane protein
STM0210	247213	1153	T	T	T	T	C	C	C	C	C	putative inner membrane protein
STM0229	267894	127	C	C	C	T	T	T	T	T	T	tetraacyldisaccharide-1-P
STM0229	267951	184	A	A	A	G	G	G	G	G	G	tetraacyldisaccharide-1-P
STM0229	268077	310	C	C	C	T	T	T	T	T	T	tetraacyldisaccharide-1-P
STM0229	268213	446	C	C	C	T	T	T	T	T	T	tetraacyldisaccharide-1-P
STM0229	268416	649	C	C	C	T	T	T	T	T	T	tetraacyldisaccharide-1-P
STM0229	268476	709	T	T	T	G	G	G	G	G	G	tetraacyldisaccharide-1-P
STM0229	268596	829	G	G	G	T	T	T	T	T	T	tetraacyldisaccharide-1-P
STM0229	268597	830	T	T	T	C	C	C	C	C	C	tetraacyldisaccharide-1-P
STM0229	268620	853	G	G	G	A	A	A	A	A	A	tetraacyldisaccharide-1-P
STM0229	268653	886	C	C	C	A	A	A	A	A	A	tetraacyldisaccharide-1-P
STM0229	268659	892	G	G	G	A	A	A	A	A	A	tetraacyldisaccharide-1-P
STM1350	1428979	1203	G	G	G	A	G	G	G	G	G	plant pathogenicity factor-like protein
STM1350	1428557	1625	G	G	G	G	A	G	G	G	G	plant pathogenicity factor-like protein
STM1175	1258785	143	C	C	C	C	C	C	A	C	C	flagellar biosynthesis protein
STM3958	4162879	309	C	C	C	C	C	T	T	T	T	ATP-dependent DNA helicase
STM3958	4164023	1453	C	C	C	T	C	C	C	C	C	ATP-dependent DNA helicase
STM1215	1297170	603	G	G	G	G	G	-	A	A	A	putative periplasmic protein
STM2866	3010486	489	A	A	A	A	G	A	A	A	A	transcriptional regulator
STM0461	519754	1235	C	C	C	C	C	T	T	T	T	putative ABC superfamily (atp&membrane) transporter
STM1743	1836444	175	A	A	A	C	C	C	C	C	C	oligopeptide transport protein
STM1075	1166756	351	A	A	A	A	A	-	C	C	C	DNA helicase IV
STM2913	3054708	849	T	T	T	T	G	G	G	G	G	putative permease
STM2913	3054122	1435	G	G	G	G	G	G	A	A	A	putative permease
STM0225	265201	297	A	A	A	G	G	G	G	G	G	histone-like protein, located in outer membrane
STM1450	1525164	364	G	A	A	A	A	A	A	A	A	pyridoxal kinase 2
STM4139	4358179	529	G	G	G	G	G	G	A	A	A	pantothenate kinase
STM3016	3175083	726	C	C	C	C	C	A	C	C	C	L-arabinose: proton symport protein
STM1060	1148171	494	C	C	C	C	A	C	C	C	C	putative iron-sulfur protein
STM3547	3716681	306	C	C	C	C	C	T	T	T	T	putative transcriptional regulator of sugar metabolism
STM0208	242908	69	T	T	T	T	C	C	C	C	C	deoxyguanosine triphosphate triphosphohydrolase
STM0208	242920	81	A	A	A	G	A	A	A	A	A	deoxyguanosine triphosphate triphosphohydrolase
STM0208	243043	204	C	C	C	T	C	C	C	C	C	deoxyguanosine triphosphate triphosphohydrolase
STM0208	243055	216	A	A	A	G	A	A	A	A	A	deoxyguanosine triphosphate triphosphohydrolase
STM0208	243067	228	A	A	A	G	A	A	A	A	A	deoxyguanosine triphosphate triphosphohydrolase
STM0208	243073	234	A	A	A	G	A	A	A	A	A	deoxyguanosine triphosphate triphosphohydrolase
STM0208	243124	285	G	G	G	G	A	A	A	A	A	deoxyguanosine triphosphate triphosphohydrolase
STM0208	243175	336	G	G	G	A	G	G	G	G	G	deoxyguanosine triphosphate triphosphohydrolase
STM0208	243202	363	T	T	T	C	C	C	C	C	C	deoxyguanosine triphosphate triphosphohydrolase
STM0208	243232	393	G	G	G	A	G	G	G	G	G	deoxyguanosine triphosphate triphosphohydrolase
STM0208	243286	447	T	T	T	C	T	T	T	T	T	deoxyguanosine triphosphate triphosphohydrolase
STM0208	243370	531	G	G	G	A	G	G	G	G	G	deoxyguanosine triphosphate triphosphohydrolase
STM0208	243856	1017	C	C	C	G	G	G	G	G	G	deoxyguanosine triphosphate triphosphohydrolase
STM0208	243947	1108	T	T	T	T	C	C	C	C	C	deoxyguanosine triphosphate triphosphohydrolase
STM0208	243949	1110	A	A	A	A	G	G	G	G	G	deoxyguanosine triphosphate triphosphohydrolase
STM0208	244009	1170	G	G	G	A	A	A	A	A	A	deoxyguanosine triphosphate triphosphohydrolase
STM0208	244103	1264	T	T	T	C	T	T	T	T	T	deoxyguanosine triphosphate triphosphohydrolase
STM0208	244127	1288	C	C	C	T	C	C	C	C	C	deoxyguanosine triphosphate triphosphohydrolase
STM0208	244159	1320	C	C	C	C	T	T	T	T	T	deoxyguanosine triphosphate triphosphohydrolase
STM0208	244216	1377	A	A	A	A	G	A	A	A	A	deoxyguanosine triphosphate triphosphohydrolase
STM3178	3342689	1240	A	T	A	A	A	A	A	A	A	putative sensory histidine kinase in regulatory system
STM4298	4543046	765	T	T	T	G	G	G	G	G	G	alpha-galactosidase
STM4298	4543271	990	T	T	A	A	A	A	A	A	A	alpha-galactosidase
STM3901	4109496	525	T	T	T	T	T	A	T	T	T	acetolactate synthase II, large subunit
STM3901	4110191	1220	G	G	G	A	G	G	G	G	G	acetolactate synthase II, large subunit
STM0351	393535	360	T	T	T	C	T	T	T	T	T	putative cation efflux system protein
STM0351	393514	381	G	G	G	G	A	A	A	A	A	putative cation efflux system protein
STM0351	393478	417	C	C	C	T	T	T	T	T	T	putative cation efflux system protein
STM0351	393430	465	G	G	G	A	A	A	A	A	A	putative cation efflux system protein
STM0351	393412	483	T	T	T	C	C	C	C	C	C	putative cation efflux system protein
STM0351	393388	507	G	G	G	G	A	A	A	A	A	putative cation efflux system protein
STM0351	393324	571	A	A	A	A	G	G	G	G	G	putative cation efflux system protein
STM0351	393232	663	C	C	C	C	T	T	T	T	T	putative cation efflux system protein
STM0351	393184	711	G	G	G	A	G	G	G	G	G	putative cation efflux system protein
STM0351	393067	828	A	A	A	A	T	T	T	T	T	putative cation efflux system protein
STM0351	393049	846	C	C	C	C	T	T	T	T	T	putative cation efflux system protein
STM0351	392989	906	T	T	T	T	C	C	C	C	C	putative cation efflux system protein
STM0351	392939	956	G	G	G	A	A	A	A	A	A	putative cation efflux system protein
STM0351	392872	1023	A	A	A	A	G	G	G	G	G	putative cation efflux system protein
STM0351	392674	1221	T	T	T	T	C	C	C	C	C	putative cation efflux system protein
STM0351	392665	1230	C	C	C	C	T	T	T	T	T	putative cation efflux system protein
STM0351	392629	1266	G	G	G	T	G	G	G	G	G	putative cation efflux system protein
STM0351	392584	1311	G	G	G	C	G	G	G	G	G	putative cation efflux system protein
STM0351	392539	1356	G	G	G	A	A	A	A	A	A	putative cation efflux system protein
STM0351	392533	1362	G	G	G	A	G	G	G	G	G	putative cation efflux system protein
STM0351	392407	1488	T	T	T	C	T	T	T	T	T	putative cation efflux system protein
STM0351	392185	1710	G	G	G	A	G	G	G	G	G	putative cation efflux system protein
STM0351	392089	1806	A	A	A	G	G	G	G	G	G	putative cation efflux system protein
STM0351	392068	1827	A	A	A	G	G	G	G	G	G	putative cation efflux system protein
STM0351	392050	1845	C	C	C	T	T	T	T	T	T	putative cation efflux system protein
STM0351	392026	1869	C	C	C	C	T	T	T	T	T	putative cation efflux system protein
STM0351	391939	1956	G	G	G	A	G	G	G	G	G	putative cation efflux system protein
STM0351	391904	1991	A	A	A	A	T	T	T	T	T	putative cation efflux system protein
STM0351	391879	2016	G	G	G	G	A	A	A	A	A	putative cation efflux system protein
STM0351	391861	2034	A	A	A	G	G	G	G	G	G	putative cation efflux system protein
STM0351	391858	2037	G	G	G	G	A	A	A	A	A	putative cation efflux system protein
STM0351	391699	2196	G	G	G	G	A	A	A	A	A	putative cation efflux system protein
STM0351	391663	2232	G	G	G	G	A	A	A	A	A	putative cation efflux system protein
STM0351	391519	2376	A	A	A	G	A	A	A	A	A	putative cation efflux system protein
STM0351	391309	2586	A	A	A	G	G	G	G	G	G	putative cation efflux system protein
STM0351	391246	2649	T	T	T	C	C	C	C	C	C	putative cation efflux system protein
STM0351	391215	2680	T	T	T	C	T	T	T	T	T	putative cation efflux system protein
STM0351	391194	2701	G	G	G	G	G	G	G	A	G	putative cation efflux system protein
STM0351	391165	2730	C	C	C	C	T	T	T	T	T	putative cation efflux system protein
STM0351	391053	2842	C	C	C	C	C	C	C	T	C	putative cation efflux system protein
STM0351	391009	2886	T	T	T	C	C	C	C	C	C	putative cation efflux system protein
STM0351	390973	2922	G	G	G	G	A	A	A	A	A	putative cation efflux system protein
STM0351	390961	2934	A	A	A	A	C	C	C	C	C	putative cation efflux system protein
STM0351	390949	2946	A	A	A	A	G	G	G	G	G	putative cation efflux system protein
STM0351	390901	2994	A	A	A	G	G	G	G	G	G	putative cation efflux system protein
STM0351	390835	3060	C	C	C	A	A	A	A	A	A	putative cation efflux system protein
STM0351	390814	3081	C	C	C	T	C	C	C	C	C	putative cation efflux system protein
STM0351	390741	3154	T	T	T	G	T	T	T	T	T	putative cation efflux system protein
STM0351	390739	3156	G	G	G	G	A	A	A	A	A	putative cation efflux system protein
STM4552	4810588	217	C	C	C	G	G	G	G	G	G	putative inner membrane protein
STM1338	1416929	274	T	T	T	T	T	T	T	G	T	phenylalanine tRNA synthetase, beta-subunit
STM2102	2183049	910	G	G	G	G	A	G	G	G	G	putative export protein
STM0829	895041	424	G	G	G	G	G	G	A	A	A	glutamine high-affinity transporter
STM0685	745942	775	A	A	A	A	A	G	A	A	A	Sugar Specific PTS family, n-acetylglucosamine-specific enzyme IIABC
STM0685	746787	1620	G	G	G	G	A	G	G	G	G	Sugar Specific PTS family, n-acetylglucosamine-specific enzyme IIABC
STM1061	1150627	756	G	G	G	G	G	A	A	A	A	putative N6-adenine-specific DNA methylase
STM1061	1151269	1398	T	T	C	C	C	C	C	C	C	putative N6-adenine-specific DNA methylase
STM1061	1151801	1930	C	C	C	C	C	C	T	C	C	putative N6-adenine-specific DNA methylase
STM2936	3075882	337	C	C	C	C	A	C	C	C	C	aminopeptidase in alkaline phosphatase isozyme conversion
STM1489	1566468	41	C	C	C	C	C	C	C	A	C	putative dethiobiotin synthase
STM2360	2470352	913	A	G	A	A	A	A	A	A	A	putative diaminopimelate decarboxylase
STM2540	2679819	242	A	A	A	A	A	A	G	A	A	co-chaperone protein Hsc20
STM2540	2679721	340	G	G	G	G	G	G	A	A	A	co-chaperone protein Hsc20
STM0637	697328	1077	C	C	C	C	C	T	T	T	T	D-alanyl-D-alanine carboxypeptidase, penicillin-binding protein 5
STM0239	280866	187	T	T	T	A	A	A	A	A	A	putative cytoplasmic protein
STM0239	280869	190	C	C	C	T	C	C	C	C	C	putative cytoplasmic protein
STM0239	280908	229	C	C	C	T	T	T	T	T	T	putative cytoplasmic protein
STM0239	280989	310	G	G	G	A	G	G	G	G	G	putative cytoplasmic protein
STM0239	280995	316	C	C	C	T	C	C	C	C	C	putative cytoplasmic protein
STM1722	1818381	41	G	G	G	G	A	G	G	G	G	trp operon leader peptide
STM0262	302251	112	A	A	A	C	C	C	C	C	C	putative SAM-dependent methyltransferase
STM0262	302261	122	C	C	C	T	T	T	T	T	T	putative SAM-dependent methyltransferase
STM0262	302368	229	C	C	C	G	G	G	G	G	G	putative SAM-dependent methyltransferase
STM0262	302369	230	T	T	T	G	T	T	T	T	T	putative SAM-dependent methyltransferase
STM0262	302371	232	A	A	A	G	G	G	G	G	G	putative SAM-dependent methyltransferase
STM0262	302401	262	C	C	C	T	T	T	T	T	T	putative SAM-dependent methyltransferase
STM0262	302482	343	G	G	G	A	A	A	A	A	A	putative SAM-dependent methyltransferase
STM0262	302497	358	C	C	C	T	T	T	T	T	T	putative SAM-dependent methyltransferase
STM0262	302707	568	G	G	G	A	A	A	A	A	A	putative SAM-dependent methyltransferase
STM0262	302716	577	T	T	T	A	A	A	A	A	A	putative SAM-dependent methyltransferase
STM0262	302738	599	C	C	C	T	C	C	C	C	C	putative SAM-dependent methyltransferase
STM1498	1573991	421	G	G	G	G	G	G	A	G	G	putative dimethyl sulfoxide reductase
STM1498	1572723	1689	C	C	C	C	C	T	C	C	C	putative dimethyl sulfoxide reductase
STM2898	3040192	1413	T	T	T	T	T	G	G	G	G	outer membrane invasion protein
STM0338	380975	62	T	T	T	C	T	T	T	T	T	putative fimbriae; usher
STM0338	380915	122	T	T	T	C	C	C	C	C	C	putative fimbriae; usher
STM0338	380878	159	G	G	G	A	G	G	G	G	G	putative fimbriae; usher
STM0338	380799	238	G	G	G	G	A	A	A	A	A	putative fimbriae; usher
STM0338	380773	264	G	G	G	G	T	T	T	T	T	putative fimbriae; usher
STM0338	380764	273	C	C	C	C	T	T	T	T	T	putative fimbriae; usher
STM0338	380751	286	G	G	G	G	C	C	C	C	C	putative fimbriae; usher
STM0338	380739	298	G	G	G	G	T	T	T	T	T	putative fimbriae; usher
STM0338	380722	315	T	T	T	C	C	C	C	C	C	putative fimbriae; usher
STM0338	380711	326	A	A	A	G	A	A	A	A	A	putative fimbriae; usher
STM0338	380684	353	G	G	G	T	G	G	G	G	G	putative fimbriae; usher
STM0338	380674	363	A	A	A	A	G	G	G	G	G	putative fimbriae; usher
STM0338	380516	521	A	A	A	G	G	G	G	G	G	putative fimbriae; usher
STM0338	380470	567	C	C	C	C	T	T	T	T	T	putative fimbriae; usher
STM0338	380413	624	G	G	G	A	G	G	G	G	G	putative fimbriae; usher
STM0338	380368	669	T	T	T	C	T	T	T	T	T	putative fimbriae; usher
STM0338	380335	702	G	G	G	G	A	A	A	A	A	putative fimbriae; usher
STM0338	380269	768	T	T	T	C	C	C	C	C	C	putative fimbriae; usher
STM0338	380260	777	G	G	G	G	A	A	A	A	A	putative fimbriae; usher
STM0338	380258	779	C	C	C	T	T	T	T	T	T	putative fimbriae; usher
STM0338	380254	783	A	A	A	G	G	G	G	G	G	putative fimbriae; usher
STM0338	380227	810	T	T	T	G	G	G	G	G	G	putative fimbriae; usher
STM0338	380122	915	G	G	G	G	A	A	A	A	A	putative fimbriae; usher
STM0338	380035	1002	C	C	C	C	T	T	T	T	T	putative fimbriae; usher
STM0338	380024	1013	C	C	C	T	C	C	C	C	C	putative fimbriae; usher
STM0338	379993	1044	A	A	A	T	A	A	A	A	A	putative fimbriae; usher
STM0338	379990	1047	T	T	T	C	T	T	T	T	T	putative fimbriae; usher
STM0338	379867	1170	C	C	C	T	C	C	C	C	C	putative fimbriae; usher
STM0338	379855	1182	G	G	G	T	G	G	G	G	G	putative fimbriae; usher
STM0338	379831	1206	A	A	A	G	G	G	G	G	G	putative fimbriae; usher
STM0338	379825	1212	C	C	C	T	C	C	C	C	C	putative fimbriae; usher
STM0338	379817	1220	T	T	T	C	C	C	C	C	C	putative fimbriae; usher
STM0338	379801	1236	G	G	G	G	A	A	A	A	A	putative fimbriae; usher
STM0338	379792	1245	T	T	T	T	C	C	C	C	C	putative fimbriae; usher
STM0338	379782	1255	T	T	T	T	A	A	A	A	A	putative fimbriae; usher
STM0338	379773	1264	G	G	G	A	G	G	G	G	G	putative fimbriae; usher
STM0338	379687	1350	A	A	A	G	A	A	A	A	A	putative fimbriae; usher
STM0338	379576	1461	A	A	A	G	G	G	G	G	G	putative fimbriae; usher
STM0338	379558	1479	G	G	G	A	G	G	G	G	G	putative fimbriae; usher
STM0338	379535	1502	A	A	A	G	G	G	G	G	G	putative fimbriae; usher
STM0338	379456	1581	A	A	A	G	G	G	G	G	G	putative fimbriae; usher
STM0338	379414	1623	C	C	C	T	C	C	C	C	C	putative fimbriae; usher
STM0338	379232	1805	G	G	G	A	G	G	G	G	G	putative fimbriae; usher
STM0338	379093	1944	G	G	G	G	A	A	A	A	A	putative fimbriae; usher
STM0338	378999	2038	C	C	C	T	C	C	C	C	C	putative fimbriae; usher
STM0338	378994	2043	C	C	C	A	C	C	C	C	C	putative fimbriae; usher
STM0338	378907	2130	G	G	G	G	A	A	A	A	A	putative fimbriae; usher
STM0338	378897	2140	A	A	A	G	G	G	G	G	G	putative fimbriae; usher
STM0338	378849	2188	A	A	A	G	G	G	G	G	G	putative fimbriae; usher
STM0338	378766	2271	C	C	C	T	C	C	C	C	C	putative fimbriae; usher
STM0338	378733	2304	C	C	C	T	C	C	C	C	C	putative fimbriae; usher
STM0338	378721	2316	G	G	G	G	A	A	A	A	A	putative fimbriae; usher
STM0338	378563	2474	A	A	A	C	C	C	C	C	C	putative fimbriae; usher
STM0338	378560	2477	A	A	A	G	G	G	G	G	G	putative fimbriae; usher
STM0338	378559	2478	A	A	A	G	G	G	G	G	G	putative fimbriae; usher
STM0338	378543	2494	C	C	C	A	C	C	C	C	C	putative fimbriae; usher
STM2575	2720978	252	C	C	C	C	C	C	A	C	C	putative LysR family transcriptional regulator
STM2575	2721030	304	C	C	C	C	T	C	C	C	C	putative LysR family transcriptional regulator
STM2575	2721101	375	A	A	A	A	A	A	T	A	A	putative LysR family transcriptional regulator
STM1788	1888324	589	C	C	C	C	C	C	T	T	T	putative Ni/Fe-hydrogenase 1 b-type cytochrome subunit
STM2445	2555964	635	C	C	C	C	T	T	T	T	T	putative oxidoreductase
STM0848	919005	914	A	A	A	T	A	A	A	A	A	putative ATPase components of ABC-type transport system, containing duplicated ATPase domain
STM0848	919729	1638	T	T	T	C	C	C	C	C	C	putative ATPase components of ABC-type transport system, containing duplicated ATPase domain
STM3577	3746188	1342	T	T	T	T	T	C	T	T	T	methyl-accepting transmembrane citrate/phenol chemoreceptor
STM3495	3650683	500	G	G	G	G	G	G	G	G	A	putative inner membrane protein
STM2981	3133475	390	A	A	G	G	G	G	G	G	G	putative small membrane protein
STM1949	2039438	86	G	G	G	G	G	A	G	G	G	putative cytoplasmic protein
STM1949	2039480	128	A	A	G	G	G	G	G	G	G	putative cytoplasmic protein
STM1287	1366231	1016	T	T	T	C	C	C	C	C	C	arylsulfatase regulator
STM3570	3737997	91	C	C	C	C	T	C	C	C	C	putative ATPase involved in cell division
STM3570	3737789	299	C	C	C	C	T	C	C	C	C	putative ATPase involved in cell division
STM2118	2201500	10	T	T	C	T	T	T	T	T	T	putative polysaccharide export protein
STM0615	678499	485	G	G	G	G	G	G	T	G	G	putative dehydrogenase
STM1385	1469818	607	A	C	A	A	A	A	A	A	A	tetrathionate reductase complex, subunit B
STM1671	1764751	369	T	T	T	T	A	A	A	A	A	putative bacterial regulatory helix-turn-helix protein, araC family
STM1922	2018371	825	G	G	G	G	G	A	G	G	G	enables flagellar motor rotation
STM2994	3143269	2846	C	C	C	T	C	C	C	C	C	exonuclease V, beta chain
STM2994	3142713	3402	T	T	T	C	T	T	T	T	T	exonuclease V, beta chain
STM3603	3776890	1323	G	G	G	G	G	A	A	A	A	cytoplasmic trehalase
STM1804	1905818	1527	G	G	G	G	G	A	A	A	A	putative cytoplasmic protein
STM4087	4294956	929	A	A	G	G	G	G	G	G	G	glycerol diffusion MIP channel
STM3773	3971446	1116	A	A	A	A	A	G	G	G	G	putative NtrC family transcriptional regulator
STM3773	3969995	2567	A	G	G	G	G	G	G	G	G	putative NtrC family transcriptional regulator
STM2321	2429867	496	C	C	C	A	A	A	A	A	A	NADH dehydrogenase I chain I
STM4282	4522586	536	A	A	A	C	C	C	C	C	C	component of formate-dependent nitrite reductase complex
STM3985	4193131	107	C	-	C	C	C	C	T	C	C	putative cytoplasmic protein
STM0776	840505	80	G	G	G	A	G	G	G	G	G	UDP-galactose 4-epimerase
STM0646	706592	901	A	A	A	G	G	G	G	G	G	DNA polymerase III, delta subunit
STM1767	1866337	286	A	T	T	T	T	T	T	T	T	response regulator in two-component regulatory system with NarX (or NarQ)
STM2671	2813390	417	C	C	C	C	C	C	C	T	T	putative periplasmic protein
STM0689	750661	714	A	A	A	G	A	A	A	A	A	citrate-proton symporter
STM3266	3435835	95	C	C	C	C	C	A	C	C	C	putative phosphoheptose isomerase
STM1057	1146242	2124	T	T	T	G	G	G	G	G	G	aminopeptidase N
STM0235	278316	108	C	C	C	C	T	T	T	T	T	putative lactoylglutathione lyase
STM0235	278327	119	C	C	C	C	T	T	T	T	T	putative lactoylglutathione lyase
STM0235	278441	233	C	C	C	T	C	C	C	C	C	putative lactoylglutathione lyase
STM2691	2841422	902	C	C	C	C	C	C	C	T	T	putative ABC transporter transmembrane region
STM0128	150523	577	C	C	C	C	C	C	T	C	C	UDP-N-acetylglucosamine:N-acetylmuramyl-(pentapeptide) pyrophosphoryl-undecaprenol N-acetylglucosamine transferase
STM0128	150790	844	C	C	C	C	T	T	T	T	T	UDP-N-acetylglucosamine:N-acetylmuramyl-(pentapeptide) pyrophosphoryl-undecaprenol N-acetylglucosamine transferase
STM0128	150874	928	A	A	A	G	G	G	G	G	G	UDP-N-acetylglucosamine:N-acetylmuramyl-(pentapeptide) pyrophosphoryl-undecaprenol N-acetylglucosamine transferase
STM1536	1610350	332	G	G	G	G	T	G	G	G	G	putative hydrogenase maturation protease
STM4022	4232833	44	G	G	G	G	G	A	A	A	A	putative aldolase
STM2852	2997870	508	C	C	C	C	T	C	C	C	C	hydrogenase-3, iron-sulfur subunit
STM2361	2474154	1290	A	A	A	A	A	G	A	A	A	putative regulatory protein
STM2995	3148062	1591	T	T	T	T	T	T	A	T	T	protease III
STM4401	4637790	406	C	C	C	T	C	C	C	C	C	putative reductase
STM2858	3003443	928	C	C	C	A	C	C	C	C	C	putative hydrogenase expression/formation protein
STM0417	471353	331	G	G	G	A	A	A	A	A	A	riboflavin synthase, beta chain
STM3002	3158400	425	T	T	T	C	C	C	C	C	C	phosphatidylglycerol-prolipoprotein diacylglyceryl transferase
STM3002	3157943	882	C	C	C	T	C	C	C	C	C	phosphatidylglycerol-prolipoprotein diacylglyceryl transferase
STM2032	2109240	442	C	C	C	T	C	C	C	C	C	synthesis of vitamin B12 adenosyl cobalamide precursor
STM2980	3132396	376	C	C	C	C	T	C	C	C	C	putative SAM-dependent methyltransferase
STM1887	1981624	144	G	G	A	G	G	G	G	G	G	putative transcriptional regulator
STM0339	383513	69	G	G	G	G	C	C	C	C	C	putative fimbriae; chaparone
STM0339	383372	210	T	T	T	C	C	C	C	C	C	putative fimbriae; chaparone
STM0339	383332	250	A	A	A	C	A	A	A	A	A	putative fimbriae; chaparone
STM0339	383324	258	T	T	T	C	C	C	C	C	C	putative fimbriae; chaparone
STM0339	383316	266	C	C	C	T	C	C	C	C	C	putative fimbriae; chaparone
STM0339	383309	273	A	A	A	G	G	G	G	G	G	putative fimbriae; chaparone
STM0339	383291	291	C	C	C	T	C	C	C	C	C	putative fimbriae; chaparone
STM0339	383276	306	G	G	G	T	G	G	G	G	G	putative fimbriae; chaparone
STM0339	383252	330	A	A	A	G	G	G	G	G	G	putative fimbriae; chaparone
STM0339	383091	491	A	A	A	A	G	G	G	G	G	putative fimbriae; chaparone
STM0339	383077	505	C	C	C	T	T	T	T	T	T	putative fimbriae; chaparone
STM0339	383051	531	T	T	T	T	C	C	C	C	C	putative fimbriae; chaparone
STM0339	382991	591	C	C	C	C	T	T	T	T	T	putative fimbriae; chaparone
STM0339	382990	592	C	C	C	C	T	T	T	T	T	putative fimbriae; chaparone
STM0339	382964	618	G	G	G	G	A	A	A	A	A	putative fimbriae; chaparone
STM0339	382949	633	T	T	T	T	A	A	A	A	A	putative fimbriae; chaparone
STM0339	382901	681	A	A	A	G	A	A	A	A	A	putative fimbriae; chaparone
STM0009	9140	237	T	T	T	C	C	C	C	C	C	putative regulatory protein
STM3388	3558814	882	G	G	G	G	G	T	T	T	T	putative membrane domain protein involved in signal transduction
STM3388	3559276	1344	C	C	C	C	T	C	C	C	C	putative membrane domain protein involved in signal transduction
STM0096	108164	1839	G	G	G	G	A	G	G	G	G	RNA polymerase associated protein
STM3496	3652758	379	T	C	C	C	C	C	C	C	C	putative hydrolase
STM2402	2515425	580	A	A	A	G	G	G	G	G	G	putative aminotransferase
STM2402	2514791	1214	C	C	C	C	C	T	T	T	T	putative aminotransferase
STM2654	2794001	378	C	C	C	C	A	C	C	C	C	MFS family alpha-ketoglutarate permease
STM1516	1593467	941	C	C	C	C	T	C	C	C	C	putative MFS family transport protein
STM0321	366519	211	G	G	G	G	A	A	A	A	A	gamma-glutamate kinase
STM0321	366522	214	C	C	C	C	T	T	T	T	T	gamma-glutamate kinase
STM0321	366561	253	C	C	C	C	T	T	T	T	T	gamma-glutamate kinase
STM0321	366585	277	G	G	G	G	T	G	G	G	G	gamma-glutamate kinase
STM0321	366678	370	A	A	A	G	G	G	G	G	G	gamma-glutamate kinase
STM0321	366786	478	T	T	T	G	G	G	G	G	G	gamma-glutamate kinase
STM0321	366939	631	G	G	G	A	G	G	G	G	G	gamma-glutamate kinase
STM0321	366945	637	A	A	A	G	A	A	A	A	A	gamma-glutamate kinase
STM0321	366984	676	G	G	G	G	A	A	A	A	A	gamma-glutamate kinase
STM0321	367071	763	C	C	C	C	T	T	T	T	T	gamma-glutamate kinase
STM0321	367143	835	T	T	T	C	T	T	T	T	T	gamma-glutamate kinase
STM0321	367164	856	C	C	C	T	C	C	C	C	C	gamma-glutamate kinase
STM0321	367284	976	T	T	T	C	T	T	T	T	T	gamma-glutamate kinase
STM0321	367335	1027	T	T	T	C	T	T	T	T	T	gamma-glutamate kinase
STM4275	4511781	1950	A	A	A	G	G	G	G	G	G	acetyl-CoA synthetase
STM2369	2480429	845	C	C	C	A	A	A	A	A	A	putative aspartate-semialdehyde dehydrogenase
STM0456	512284	149	G	G	G	G	T	G	G	G	G	putative ABC transporter periplasmic binding protein
STM0310	355368	99	C	C	C	T	T	T	T	T	T	phosphoheptose isomerase
STM0310	355431	162	C	C	C	T	C	C	C	C	C	phosphoheptose isomerase
STM0310	355458	189	G	G	G	G	G	A	A	A	A	phosphoheptose isomerase
STM0310	355512	243	C	C	C	T	C	C	C	C	C	phosphoheptose isomerase
STM3300	3469432	792	C	C	C	A	A	A	A	A	A	D-alanyl-D-alanine carboxypeptidase
STM0837	903342	559	C	C	C	T	C	C	C	C	C	putative periplasmic protein
STM0837	903192	709	A	A	A	G	G	G	G	G	G	putative periplasmic protein
STM1183	1266672	1226	T	T	T	C	C	C	C	C	C	hook-filament junction protein 1
STM2447	2558452	170	G	G	G	G	G	A	G	G	G	putative outer membrane lipoprotein
STM4409	4647247	1191	C	C	C	C	A	A	A	A	A	putative outer membrane protein
STM3217	3382485	278	A	A	A	C	A	A	A	A	A	aerotaxis sensor receptor
STM4277	4516269	342	C	C	C	C	C	C	C	C	T	nitrite reductase periplasmic cytochrome c(552)
STM3133	3293140	13	T	T	T	G	G	G	G	G	G	putative amidohydrolase
STM3133	3292920	233	G	G	G	A	G	G	G	G	G	putative amidohydrolase
STM1581	1667532	106	C	C	C	T	C	C	C	C	C	putative phenazine biosynthesis protein
STM3928	4137964	847	G	A	G	G	G	G	G	G	G	TDP-Fuc4NAc:lipidII transferase
STM2129	2222056	348	G	G	G	A	G	G	G	G	G	putative MFS family transport protein
STM2129	2222864	1156	A	A	A	A	G	A	A	A	A	putative MFS family transport protein
STM2895	3037802	175	G	G	G	G	G	A	A	A	A	surface presentation of antigens
STM3515	3676998	252	A	A	A	C	A	A	A	A	A	transcriptional activator of the mal genes
STM2324	2433407	1244	C	C	C	C	T	C	C	C	C	NADH dehydrogenase I chain F
STM2861	3006815	447	C	C	C	T	C	C	C	C	C	fur regulated Salmonella iron transporter
STM0220	258017	182	C	C	C	T	C	C	C	C	C	1-deoxy-D-xylulose 5-phosphate reductoisomerase
STM0220	258073	238	C	C	C	C	C	C	C	C	T	1-deoxy-D-xylulose 5-phosphate reductoisomerase
STM0220	258197	362	A	A	A	G	G	G	G	G	G	1-deoxy-D-xylulose 5-phosphate reductoisomerase
STM0220	258428	593	A	A	A	A	C	C	C	C	C	1-deoxy-D-xylulose 5-phosphate reductoisomerase
STM0220	258737	902	T	T	T	C	C	C	C	C	C	1-deoxy-D-xylulose 5-phosphate reductoisomerase
STM0220	258794	959	G	G	G	T	T	T	T	T	T	1-deoxy-D-xylulose 5-phosphate reductoisomerase
STM0220	258956	1121	G	G	G	C	C	C	C	C	C	1-deoxy-D-xylulose 5-phosphate reductoisomerase
STM0220	258974	1139	G	G	G	T	G	G	G	G	G	1-deoxy-D-xylulose 5-phosphate reductoisomerase
STM3503	3660766	221	A	A	A	A	A	C	A	A	A	transcription elongation factor and transcript cleavage
STM2918	3060110	602	G	G	G	G	A	A	A	A	A	3-hydroxyisobutyrate dehydrogenase
STM2476	2585498	423	G	G	G	G	G	A	A	A	A	putative periplasmic protein
STM0639	700241	671	C	C	C	C	C	T	T	T	T	rod shape-determining membrane protein; cell elongation in e phase
STM2962	3113027	218	G	G	G	A	G	G	G	G	G	putative MFS superfamily D-glucarate permease
STM2962	3112897	348	A	A	A	G	G	G	G	G	G	putative MFS superfamily D-glucarate permease
STM1469	1544158	275	C	C	C	C	C	T	C	C	C	fumarase C
STM1469	1544375	492	G	G	G	G	G	A	A	A	A	fumarase C
STM0600	662053	790	G	G	G	G	G	T	G	G	G	carbon starvation protein
STM0107	123368	734	T	T	G	T	T	T	T	T	T	putative binding-protein-dependent transport system inner membrane component
STM4232	4453780	177	T	T	T	A	T	T	T	T	T	periplasmic protein of mal regulon
STM1846	1942951	249	C	G	C	C	C	C	C	C	C	activator of proP
STM1530	1606676	274	G	G	G	A	G	G	G	G	G	putative outer membrane protein
STM3146	3308158	143	G	G	G	G	G	A	G	G	G	putative processing element for hydrogenase-2
STM1582	1668285	85	T	T	T	G	G	G	G	G	G	putative arylamine N-acetyltransferase
STM0135	158248	50	C	C	C	C	T	C	C	C	C	putative inner membrane protein
STM1827	1924890	118	C	C	C	C	T	C	C	C	C	putative diguanylate cyclase/phosphodiesterase
STM1827	1925927	1155	C	C	C	T	C	C	C	C	C	putative diguanylate cyclase/phosphodiesterase
STM3093	3256066	719	A	A	A	T	A	A	A	A	A	DNA-specific endonuclease I
STM0306	349790	105	G	G	G	A	G	G	G	G	G	homolog of sapA
STM0306	349733	162	T	T	T	C	C	C	C	C	C	homolog of sapA
STM0306	349564	331	G	G	G	G	C	C	C	C	C	homolog of sapA
STM0306	349562	333	T	T	T	T	G	G	G	G	G	homolog of sapA
STM0306	349534	361	G	G	G	A	G	G	G	G	G	homolog of sapA
STM0306	349478	417	A	A	A	A	G	G	G	G	G	homolog of sapA
STM0306	349472	423	T	T	T	C	A	A	A	A	A	homolog of sapA
STM0306	349445	450	C	C	C	T	C	C	C	C	C	homolog of sapA
STM0306	349283	612	T	T	T	A	A	A	A	A	A	homolog of sapA
STM0190	221081	171	A	A	A	A	G	A	A	A	A	transpeptidase of penicillin-binding protein 1b
STM0190	221283	373	A	A	A	G	G	G	G	G	G	transpeptidase of penicillin-binding protein 1b
STM0190	221460	550	C	C	T	C	C	C	C	C	C	transpeptidase of penicillin-binding protein 1b
STM0190	222257	1347	C	C	C	C	C	C	T	C	C	transpeptidase of penicillin-binding protein 1b
STM0190	222855	1945	A	A	A	G	G	G	G	G	G	transpeptidase of penicillin-binding protein 1b
STM3536	3702169	656	C	C	C	C	C	T	C	C	C	glucose-1-phosphate adenylyltransferase
STM3553	3722480	292	G	G	G	T	G	G	G	G	G	cytosolic glycerophosphodiester phosphodiesterase
STM3553	3722343	429	G	G	G	G	G	G	G	A	A	cytosolic glycerophosphodiester phosphodiesterase
STM1468	1542755	578	G	G	G	C	C	C	C	C	C	fumarase A
STM0583	639153	529	C	C	C	C	A	A	A	A	A	putative cytoplasmic protein
STM0952	1029523	181	A	G	A	A	A	A	A	A	A	putative transcriptional regulator, lysR family
STM1768	1866690	27	T	T	C	T	T	T	T	T	T	putative invasin
STM1768	1866650	67	T	T	T	T	C	T	T	T	T	putative invasin
STM1768	1866466	251	A	A	A	C	A	A	A	A	A	putative invasin
STM2570	2714979	230	T	T	G	T	T	T	T	T	T	putative phosphotransferase system IIB components
STM1569	1649032	506	T	T	T	G	G	G	G	G	G	formate dehydrogenase-N, Fe-S beta subunit
STM4051	4262607	43	C	C	C	C	A	A	A	A	A	putative outer membrane protein
STM0149	170491	1320	A	A	A	A	A	A	A	G	G	putative permease of the Na+:galactoside symporter family
STM1764	1855734	2674	C	C	C	C	C	A	A	A	A	nitrate reductase 1, alpha subunit
STM1764	1854596	3812	C	C	C	C	T	C	C	C	C	nitrate reductase 1, alpha subunit
STM4238	4460332	295	A	A	A	A	A	A	G	A	A	DNA-damage-inducible protein F
STM0400	455696	1053	G	G	G	A	G	G	G	G	G	putative APC family, proline transporter
STM0703	766791	226	C	C	C	A	A	A	A	A	A	sensory kinase in two-component regulatory system wtih KdpE
STM0703	764902	2115	C	C	C	T	C	C	C	C	C	sensory kinase in two-component regulatory system wtih KdpE
STM0703	764536	2481	C	C	C	A	C	C	C	C	C	sensory kinase in two-component regulatory system wtih KdpE
STM1382	1463873	925	G	G	G	A	G	G	G	G	G	putative regulatory protein, deoR family
STM1458	1533418	344	C	C	C	C	C	C	C	C	A	putative alternative beta subunit of Na+-transporting NADH:ubiquinone oxidoreductase
STM0974	1057410	32	G	G	T	G	G	G	G	G	G	formate transporter
STM1885	1977097	522	T	G	G	G	G	G	G	G	G	6-phosphogluconate dehydratase
STM3370	3539373	482	G	G	G	G	G	A	G	G	G	RNase G
STM3370	3538698	1157	G	G	G	G	G	G	G	T	G	RNase G
STM3364	3529147	861	G	G	G	G	G	A	A	A	A	putative inner membrane protein
STM3455	3605751	572	T	T	T	T	T	G	T	T	T	FKBP-type peptidyl prolyl cis-trans isomerase
STM3455	3605748	575	T	T	T	T	T	G	T	T	T	FKBP-type peptidyl prolyl cis-trans isomerase
STM3455	3605745	578	T	T	T	T	T	G	T	T	T	FKBP-type peptidyl prolyl cis-trans isomerase
STM3455	3605739	584	C	C	C	C	C	G	C	C	C	FKBP-type peptidyl prolyl cis-trans isomerase
STM3455	3605730	593	T	T	T	T	T	G	T	T	T	FKBP-type peptidyl prolyl cis-trans isomerase
STM0347	391265	209	T	T	T	T	G	G	G	G	G	putative response regulator
STM0347	391302	246	A	A	A	A	G	G	G	G	G	putative response regulator
STM0347	391440	384	C	C	C	C	T	T	T	T	T	putative response regulator
STM0347	391443	387	A	A	A	A	T	T	T	T	T	putative response regulator
STM0347	391587	531	T	T	T	T	C	C	C	C	C	putative response regulator
STM0231	270299	764	G	G	G	T	T	T	T	T	T	DNA polymerase III, alpha subunit
STM0231	270380	845	C	C	C	T	T	T	T	T	T	DNA polymerase III, alpha subunit
STM0231	270434	899	T	T	T	G	G	G	G	G	G	DNA polymerase III, alpha subunit
STM0231	272287	2752	C	C	C	T	T	T	T	T	T	DNA polymerase III, alpha subunit
STM0231	272326	2791	A	A	A	G	G	G	G	G	G	DNA polymerase III, alpha subunit
STM0231	272353	2818	G	G	G	A	A	A	A	A	A	DNA polymerase III, alpha subunit
STM2073	2152263	360	A	A	A	A	A	A	A	T	A	histidinol phosphate aminotransferase
STM1340	1420029	477	T	T	T	T	T	C	C	C	C	vitamin B12 transport protein
STM2552	2689970	342	G	G	G	G	A	G	G	G	G	putative periplasmic or exported protein
STM2552	2689761	551	C	C	C	C	C	T	T	T	T	putative periplasmic or exported protein
STM2501	2616945	2027	A	A	A	A	G	A	A	A	A	polyphosphate kinase
STM3841	4046241	69	T	T	C	C	C	C	C	C	C	putative inner membrane protein
STM3063	3224340	444	C	C	C	C	C	T	T	T	T	constitutive ribosephosphate isomerase
STM0237	279880	169	A	A	A	G	A	A	A	A	A	modulator of Rho-dependent transcription termination
STM0237	279865	184	A	A	A	G	A	A	A	A	A	modulator of Rho-dependent transcription termination
STM0237	279844	205	A	A	A	A	G	G	G	G	G	modulator of Rho-dependent transcription termination
STM0588	646930	1477	A	A	A	A	A	A	T	T	T	enterobactin synthetase, component F (nonribosomal peptide synthetase)
STM3135	3296853	772	A	C	C	C	C	C	C	C	C	putative mannonate hydrolase
STM3135	3297181	1100	C	C	C	C	C	C	G	C	C	putative mannonate hydrolase
STM2275	2379510	169	C	-	C	C	C	C	A	A	A	putative gntR family regulatory protein
STM2275	2379623	282	G	-	A	G	G	G	G	G	G	putative gntR family regulatory protein
STM3648	3835909	50	G	G	G	G	A	G	G	G	G	putative transcriptional regulator
STM3648	3836042	183	C	C	C	T	C	C	C	C	C	putative transcriptional regulator
STM2331	2442416	436	C	C	C	C	C	C	C	C	T	putative aminotransferase (ortho)
STM0690	752667	63	C	C	C	C	C	C	T	T	T	citrate utilization protein b
STM0690	751646	1084	G	G	G	G	G	G	G	A	A	citrate utilization protein b
STM0233	274219	43	G	G	G	A	G	G	G	G	G	putative endochitinase
STM0233	274228	52	A	A	A	G	A	A	A	A	A	putative endochitinase
STM0233	274258	82	T	T	T	C	T	T	T	T	T	putative endochitinase
STM0233	274294	118	C	C	C	T	C	C	C	C	C	putative endochitinase
STM0233	274314	138	C	C	A	C	C	C	C	C	C	putative endochitinase
STM0233	274330	154	G	G	G	A	G	G	G	G	G	putative endochitinase
STM0233	274354	178	A	A	A	C	C	C	C	C	C	putative endochitinase
STM0233	274369	193	C	C	C	T	C	C	C	C	C	putative endochitinase
STM0233	274504	328	C	C	C	T	C	C	C	C	C	putative endochitinase
STM0233	274510	334	T	T	T	C	C	C	C	C	C	putative endochitinase
STM0233	274601	425	C	C	C	C	T	T	T	T	T	putative endochitinase
STM0233	274694	518	C	C	C	C	C	T	C	C	C	putative endochitinase
STM0233	274819	643	T	T	T	T	C	C	C	C	C	putative endochitinase
STM0233	274940	764	T	T	T	G	G	G	G	G	G	putative endochitinase
STM0233	275068	892	C	C	C	T	T	T	T	T	T	putative endochitinase
STM0233	275134	958	T	T	T	C	T	T	T	T	T	putative endochitinase
STM0233	275185	1009	T	T	T	T	G	G	G	G	G	putative endochitinase
STM0233	275320	1144	G	G	G	T	G	G	G	G	G	putative endochitinase
STM0233	275356	1180	C	C	C	C	T	T	T	T	T	putative endochitinase
STM0233	275398	1222	T	T	T	C	C	C	C	C	C	putative endochitinase
STM0233	275416	1240	G	G	G	C	C	C	C	C	C	putative endochitinase
STM0233	275779	1603	C	C	C	C	T	T	T	T	T	putative endochitinase
STM0233	275824	1648	C	C	C	C	T	T	T	T	T	putative endochitinase
STM0233	275908	1732	C	C	C	C	T	T	T	T	T	putative endochitinase
STM2072_hisD	2151018	419	C	C	C	G	G	G	G	G	G	histidinal dehydrogenase
STM2812	2959704	274	T	T	T	A	T	T	T	T	T	putative inner membrane protein
STM2812	2959878	448	G	G	G	G	T	G	G	G	G	putative inner membrane protein
STM3377	3548400	309	A	A	G	A	A	A	A	A	A	putative nitrate reductase
STM0817	880872	1090	G	G	G	A	G	G	G	G	G	putative ABC-type multidrug transport system, ATPase component
STM2567	2713086	702	C	C	C	C	C	C	T	C	C	putative periplasmic amino acid binding protein
STM2567	2713147	763	T	T	T	T	C	T	T	T	T	putative periplasmic amino acid binding protein
STM1392	1475021	1807	C	C	C	C	T	C	C	C	C	secretion system regulator: Sensor component
STM1392	1475017	1811	A	A	G	G	G	G	G	G	G	secretion system regulator: Sensor component
STM1392	1474990	1838	C	C	C	A	C	C	C	C	C	secretion system regulator: Sensor component
STM1392	1474950	1878	C	C	C	C	C	C	C	T	T	secretion system regulator: Sensor component
STM1392	1474277	2551	G	A	G	G	G	G	G	G	G	secretion system regulator: Sensor component
STM0422	472993	1639	G	G	G	A	G	G	G	G	G	1-deoxyxylulose-5-phosphate synthase; flavoprotein
STM4084	4291710	681	A	A	A	A	A	A	A	A	G	ferredoxin-NADP reductase
STM1182	1264702	274	G	A	G	G	G	G	G	G	G	flagellar biosynthesis protein
STM0374	428491	315	A	A	A	A	G	G	G	G	G	putative inner membrane protein
STM1622	1708589	1233	G	G	G	T	G	G	G	G	G	putative periplasmic glucans biosynthesis protein
STM1622	1708217	1605	C	C	C	C	T	C	C	C	C	putative periplasmic glucans biosynthesis protein
STM3090	3252280	597	C	C	C	A	A	A	A	A	A	methionine adenosyltransferase 1
STM0205	240513	98	C	C	C	T	T	T	T	T	T	putative inner membrane protein
STM0205	240474	137	T	T	T	C	C	C	C	C	C	putative inner membrane protein
STM0205	240405	206	C	C	C	T	C	C	C	C	C	putative inner membrane protein
STM0205	240366	245	G	G	G	G	A	A	A	A	A	putative inner membrane protein
STM0205	240342	269	G	G	G	G	A	A	A	A	A	putative inner membrane protein
STM0205	240321	290	G	G	G	A	A	A	A	A	A	putative inner membrane protein
STM0205	240240	371	C	C	C	T	T	T	T	T	T	putative inner membrane protein
STM0205	240174	437	T	T	T	C	C	C	C	C	C	putative inner membrane protein
STM0205	240111	500	C	C	C	T	C	C	C	C	C	putative inner membrane protein
STM0205	240054	557	C	C	C	C	G	G	G	G	G	putative inner membrane protein
STM0205	240042	569	T	T	T	C	C	C	C	C	C	putative inner membrane protein
STM0354	400896	44	T	T	T	C	C	C	C	C	C	putative transcriptional regulator
STM0354	401025	173	T	T	T	C	C	C	C	C	C	putative transcriptional regulator
STM0354	401031	179	C	C	C	C	T	T	T	T	T	putative transcriptional regulator
STM3500	3657529	1010	C	C	C	C	C	C	A	C	C	phosphoenolpyruvate carboxykinase
STM3500	3657753	1234	G	G	G	G	G	G	G	A	G	phosphoenolpyruvate carboxykinase
STM0779	844053	393	C	C	C	C	T	C	C	C	C	transcriptional repressor of modABCD operon (molybdate uptake)
STM0320	364876	106	C	C	C	C	T	T	T	T	T	outer membrane pore protein e (e,ic,nmpab)
STM0320	364827	155	G	G	G	G	A	A	A	A	A	outer membrane pore protein e (e,ic,nmpab)
STM0320	364614	368	G	G	G	G	A	A	A	A	A	outer membrane pore protein e (e,ic,nmpab)
STM0320	364536	446	C	C	C	T	C	C	C	C	C	outer membrane pore protein e (e,ic,nmpab)
STM0320	364266	716	A	A	A	A	T	T	T	T	T	outer membrane pore protein e (e,ic,nmpab)
STM0320	364254	728	T	T	T	C	T	T	T	T	T	outer membrane pore protein e (e,ic,nmpab)
STM0320	364239	743	C	C	C	T	T	T	T	T	T	outer membrane pore protein e (e,ic,nmpab)
STM0320	364134	848	T	T	T	A	T	T	T	T	T	outer membrane pore protein e (e,ic,nmpab)
STM0320	364122	860	T	T	T	G	G	G	G	G	G	outer membrane pore protein e (e,ic,nmpab)
STM0320	364107	875	T	T	T	T	G	G	G	G	G	outer membrane pore protein e (e,ic,nmpab)
STM0320	364103	879	A	A	A	G	A	A	A	A	A	outer membrane pore protein e (e,ic,nmpab)
STM0320	364101	881	C	C	C	T	T	T	T	T	T	outer membrane pore protein e (e,ic,nmpab)
STM0320	364044	938	C	C	C	C	T	T	T	T	T	outer membrane pore protein e (e,ic,nmpab)
STM0320	364038	944	C	C	C	T	C	C	C	C	C	outer membrane pore protein e (e,ic,nmpab)
STM4228	4446579	1090	T	T	T	C	T	T	T	T	T	maltose transport protein
STM4228	4446564	1105	C	C	C	C	T	C	C	C	C	maltose transport protein
STM0124	146227	1279	A	A	A	G	A	A	A	A	A	D-alanine:D-alanine-adding enzyme
STM0193	226833	60	G	G	G	A	A	A	A	A	A	hydroxamate-dependent iron uptake
STM0193	227073	300	T	T	T	G	G	G	G	G	G	hydroxamate-dependent iron uptake
STM0193	227575	802	T	T	T	C	C	C	C	C	C	hydroxamate-dependent iron uptake
STM3935	4141131	805	G	G	A	G	G	G	G	G	G	protein for a late step of protoheme IX synthesis
STM3695	3889935	344	C	C	C	T	T	T	T	T	T	putative tRNA/rRNA methyltransferase
STM2830	2975579	426	C	C	C	C	C	A	A	A	A	putative cytoplasmic protein
STM0983	1068954	827	G	G	G	A	G	G	G	G	G	putative recombination protein
STM0445	499711	410	G	G	G	A	G	G	G	G	G	putative lipoprotein
STM3562	3730088	58	C	C	C	C	C	C	T	C	C	high-affinity branched-chain amino acid transporter
STM4300	4544774	608	G	G	G	T	G	G	G	G	G	fumarase B
STM2563	2705149	261	C	C	A	C	C	C	C	C	C	putative transcriptional regulator of two-component regulator protein (EBP familiiy)
STM1202	1285644	388	G	G	G	A	G	G	G	G	G	putative metal-dependent hydrolase
STM3247	3415074	144	T	T	T	C	C	C	C	C	C	glycerate kinase
STM1901	1994422	687	T	T	T	C	T	T	T	T	T	aspartate tRNA synthetase
STM4598	4854813	576	G	G	G	G	A	G	G	G	G	response regulator (OmpR family) in two-component regulatory system with ArcB (or CpxA)
STM0349	392026	43	T	T	T	G	T	T	T	T	T	putative outer membrane lipoprotein
STM0349	392041	58	C	C	C	T	C	C	C	C	C	putative outer membrane lipoprotein
STM0349	392230	247	C	C	C	C	A	A	A	A	A	putative outer membrane lipoprotein
STM0349	392290	307	G	G	G	G	T	T	T	T	T	putative outer membrane lipoprotein
STM4225	4444022	83	C	C	C	C	C	C	C	T	T	putative outer membrane lipoprotein
STM3672	3859936	1254	C	C	C	C	C	A	C	C	C	putative DedA family, membrane protein
STM0308	351565	158	C	C	C	C	T	T	T	T	T	putative amidohydrolase
STM0308	351301	422	T	T	T	C	C	C	C	C	C	putative amidohydrolase
STM0308	351294	429	C	C	C	T	T	T	T	T	T	putative amidohydrolase
STM0308	351115	608	C	C	C	T	C	C	C	C	C	putative amidohydrolase
STM0308	351112	611	C	C	C	C	T	T	T	T	T	putative amidohydrolase
STM0308	351067	656	T	T	T	C	C	C	C	C	C	putative amidohydrolase
STM0308	351064	659	T	T	T	C	C	C	C	C	C	putative amidohydrolase
STM0308	351058	665	C	C	C	C	T	T	T	T	T	putative amidohydrolase
STM0308	351025	698	T	T	T	C	T	T	T	T	T	putative amidohydrolase
STM0932	1005743	775	C	C	C	C	C	C	T	C	C	putative nucleoside-diphosphate-sugar epimerase
STM1782	1880504	54	G	G	G	G	G	G	G	G	T	putative inner membrane protein
STM3586	3752287	684	G	G	G	G	G	A	G	G	G	putative ABC-type multidrug transport system
STM2323	2431265	629	C	C	C	C	T	C	C	C	C	NADH dehydrogenase I chain G
STM3656	3841362	500	C	C	C	T	C	C	C	C	C	glycine tRNA synthetase, alpha subunit
STM1490	1566918	174	G	G	G	A	G	-	G	G	G	putative chloride channel protein
STM1490	1566383	709	G	G	A	G	G	-	G	G	G	putative chloride channel protein
STM1490	1566023	1069	C	C	C	T	C	-	C	C	C	putative chloride channel protein
STM3776	3977038	360	C	C	C	C	C	C	T	C	C	putative MFS family tranport protein
STM1574	1656069	735	C	C	C	T	C	C	C	C	C	methyl viologen resistance protein
STM1574	1655996	808	C	C	A	C	C	C	C	C	C	methyl viologen resistance protein
STM0209	244666	174	A	A	A	T	A	A	A	A	A	periplasmic serine protease Do, heat shock protein
STM0209	244774	282	C	C	C	G	G	G	G	G	G	periplasmic serine protease Do, heat shock protein
STM0209	244783	291	A	A	A	G	G	G	G	G	G	periplasmic serine protease Do, heat shock protein
STM0209	244837	345	T	T	T	C	C	C	C	C	C	periplasmic serine protease Do, heat shock protein
STM0209	244867	375	G	G	G	C	C	C	C	C	C	periplasmic serine protease Do, heat shock protein
STM0209	245158	666	C	C	C	C	T	T	T	T	T	periplasmic serine protease Do, heat shock protein
STM0209	245194	702	C	C	C	T	C	C	C	C	C	periplasmic serine protease Do, heat shock protein
STM0209	245287	795	C	C	C	C	T	T	T	T	T	periplasmic serine protease Do, heat shock protein
STM0209	245422	930	C	C	C	C	T	T	T	T	T	periplasmic serine protease Do, heat shock protein
STM0209	245431	939	A	A	A	A	T	T	T	T	T	periplasmic serine protease Do, heat shock protein
STM0209	245557	1065	C	C	C	C	T	T	T	T	T	periplasmic serine protease Do, heat shock protein
STM0209	245623	1131	G	G	G	G	T	T	T	T	T	periplasmic serine protease Do, heat shock protein
STM0209	245752	1260	C	C	C	C	T	T	T	T	T	periplasmic serine protease Do, heat shock protein
STM0209	245785	1293	T	T	T	C	T	T	T	T	T	periplasmic serine protease Do, heat shock protein
STM0209	245833	1341	G	G	G	G	A	A	A	A	A	periplasmic serine protease Do, heat shock protein
STM0209	245866	1374	G	G	G	A	T	T	T	T	T	periplasmic serine protease Do, heat shock protein
STM0209	245872	1380	G	G	G	G	T	T	T	T	T	periplasmic serine protease Do, heat shock protein
STM2478	2587987	133	C	C	C	C	C	T	T	T	T	putative beta-lactamase class C
STM2478	2588776	922	A	A	A	C	C	C	C	C	C	putative beta-lactamase class C
STM2021	2101613	408	A	A	A	G	G	G	G	G	G	synthesis of vitamin B12 adenosyl cobalamide precursor
STM0793	857489	1309	G	G	G	G	G	G	A	G	G	7,8-diaminopelargonic acid synthetase
STM0405	461230	420	G	G	G	A	G	G	G	G	G	tRNA-guanine transglycosylase
STM0405	461352	542	C	C	C	A	C	C	C	C	C	tRNA-guanine transglycosylase
STM0355	401402	7	T	T	T	C	T	T	T	T	T	putative copper chaperone
STM0355	401498	103	T	T	T	C	T	T	T	T	T	putative copper chaperone
STM0355	401591	196	G	G	G	A	G	G	G	G	G	putative copper chaperone
STM4242	4463006	433	C	C	C	C	C	T	C	C	C	putative outer membrane or exported protein
STM4242	4463582	1009	G	G	G	G	G	G	A	G	G	putative outer membrane or exported protein
STM4242	4463722	1149	T	T	T	C	T	T	T	T	T	putative outer membrane or exported protein
STM1604	1692410	1221	A	A	A	G	G	G	G	G	G	putative collagenase
STM2125	2213049	575	G	G	G	G	G	G	A	G	G	putative heat shock protein (Hsp70/DnaK)
STM2125	2213564	1090	C	C	C	T	C	C	C	C	C	putative heat shock protein (Hsp70/DnaK)
STM0372	423129	551	G	G	G	G	G	G	A	G	G	5-aminolevulinate dehydratase (porphobilinogen synthase)
STM2204	2302452	1129	C	C	C	C	C	C	C	T	C	fructose-specific transport protein
STM0476	532324	99	G	G	G	A	A	A	A	A	A	acridine efflux pump
STM0950	1027079	604	G	G	G	G	G	G	A	G	G	homolog of slsA in STM
STM0316	360575	400	T	T	T	C	T	T	T	T	T	aminoacyl-histidine dipeptidase (peptidase D)
STM0316	360560	415	T	T	T	C	T	T	T	T	T	aminoacyl-histidine dipeptidase (peptidase D)
STM0316	360413	562	T	T	T	C	T	T	T	T	T	aminoacyl-histidine dipeptidase (peptidase D)
STM0316	360410	565	T	T	T	C	T	T	T	T	T	aminoacyl-histidine dipeptidase (peptidase D)
STM0316	360332	643	C	C	C	T	C	C	C	C	C	aminoacyl-histidine dipeptidase (peptidase D)
STM0316	360293	682	T	T	T	C	T	T	T	T	T	aminoacyl-histidine dipeptidase (peptidase D)
STM0316	360157	818	G	G	G	T	G	G	G	G	G	aminoacyl-histidine dipeptidase (peptidase D)
STM0316	360151	824	G	G	G	A	G	G	G	G	G	aminoacyl-histidine dipeptidase (peptidase D)
STM0316	360044	931	C	C	C	T	C	C	C	C	C	aminoacyl-histidine dipeptidase (peptidase D)
STM0316	359924	1051	G	G	G	A	G	G	G	G	G	aminoacyl-histidine dipeptidase (peptidase D)
STM0316	359705	1270	C	C	C	C	T	T	T	T	T	aminoacyl-histidine dipeptidase (peptidase D)
STM0316	359693	1282	G	G	G	G	T	T	T	T	T	aminoacyl-histidine dipeptidase (peptidase D)
STM0316	359627	1348	C	C	C	T	C	C	C	C	C	aminoacyl-histidine dipeptidase (peptidase D)
STM0316	359621	1354	T	T	T	C	T	T	T	T	T	aminoacyl-histidine dipeptidase (peptidase D)
STM0316	359609	1366	G	G	G	T	T	T	T	T	T	aminoacyl-histidine dipeptidase (peptidase D)
STM0418	471593	78	A	A	A	G	G	G	G	G	G	transcription termination; L factor
STM2349	2460838	438	G	G	G	G	G	G	G	G	A	putative glutathione S-transferase
STM2349	2460885	485	C	C	C	C	C	T	C	C	C	putative glutathione S-transferase
STM0934	1008570	501	G	G	G	T	T	T	T	T	T	L-allo-threonine aldolase
STM0042	50332	120	G	G	G	T	T	T	T	T	T	putative sodium galactoside symporter
STM0042	49796	656	G	G	G	G	G	G	T	G	G	putative sodium galactoside symporter
STM4337	4580371	302	C	A	C	C	C	C	C	C	C	putative luxR family bacterial regulatory protein
STM4337	4580177	496	G	G	G	G	A	G	G	G	G	putative luxR family bacterial regulatory protein
STM4337	4580144	529	T	T	T	C	T	T	T	T	T	putative luxR family bacterial regulatory protein
STM2142	2236565	309	A	A	A	G	G	G	G	G	G	putative MFS family transport protein
STM2142	2237112	856	G	A	G	G	G	G	G	G	G	putative MFS family transport protein
STM0510	571404	296	A	A	A	A	A	C	C	C	C	putative ABC-type transport system ATPase component/cell division protein
STM0510	571587	479	C	C	C	A	A	A	A	A	A	putative ABC-type transport system ATPase component/cell division protein
STM3571	3738575	184	A	A	A	G	G	G	G	G	G	GTPase domain of cell division membrane protein
STM3571	3737468	1291	C	C	C	T	C	C	C	C	C	GTPase domain of cell division membrane protein
STM3181	3343487	483	T	T	T	T	G	T	T	T	T	DNA topoisomerase IV, subunit B
STM4183	4401896	33	T	T	T	G	G	G	G	G	G	malate synthase A
STM4090	4297565	603	A	G	G	G	G	G	G	G	G	1,4-dihydroxy-2-naphthoate octaprenyltransferase
STM2863	3008131	32	A	A	A	G	G	G	G	G	G	fur regulated Salmonella iron transporter
STM4123	4342565	1147	C	C	C	T	C	C	C	C	C	argininosuccinate lyase
STM3625	3809404	473	C	C	C	C	T	C	C	C	C	putative HAAAP family transport protein
STM3604	3776724	525	C	C	C	T	C	-	C	C	C	putative inner membrane protein
STM3604	3775924	1325	G	G	G	A	G	-	G	G	G	putative inner membrane protein
STM3314	3480053	87	G	G	G	G	A	G	G	G	G	putative CacA family Na:Ca transport protein
STM3211	3378171	1948	T	T	T	T	T	T	A	A	A	sigma D factor of RNA polymerase
STM0413	467383	156	C	C	C	C	C	C	C	T	T	nucleoside channel; receptor of phage T6 and colicin K
STM4358	4600438	70	C	C	C	C	C	C	A	C	C	N-acetylmuramoyl-l-alanine amidase II
STM4358	4601465	1097	G	G	G	T	T	T	T	T	T	N-acetylmuramoyl-l-alanine amidase II
STM4358	4601651	1283	C	C	C	A	C	C	C	C	C	N-acetylmuramoyl-l-alanine amidase II
STM3355	3522798	74	C	C	C	C	A	C	C	C	C	putative tartrate dehydratase alpha subunit
STM3722	3916491	260	T	T	T	T	G	G	G	G	G	glucosyltransferase I
STM2530	2662106	808	C	C	C	C	T	C	C	C	C	putative anaerobic dimethylsulfoxide reductase
STM2530	2660635	2279	G	G	G	A	G	G	G	G	G	putative anaerobic dimethylsulfoxide reductase
STM4581	4836017	1161	A	A	A	G	G	G	G	G	G	putative transport protein
STM2786	2935340	754	G	G	G	G	G	A	G	G	G	tricarboxylic transport protein
STM0813	878041	313	C	C	C	C	C	C	C	C	T	putative cytoplasmic protein
STM0813	878016	338	T	T	T	C	C	C	C	C	C	putative cytoplasmic protein
STM4303	4549029	165	C	C	C	A	C	C	C	C	C	response regulator in two-component regulatory system with DcuS
STM3736	3927982	465	C	C	C	C	T	C	C	C	C	putative LysR family transcriptional regulator
STM4125	4343188	168	T	T	T	T	T	T	T	C	C	regulatory protein sensor for oxidative stress
STM3708	3902323	572	C	C	C	T	T	T	T	T	T	threonine 3-dehydrogenase
STM3708	3902019	876	C	C	C	C	A	C	C	C	C	threonine 3-dehydrogenase
STM3420	3585635	400	G	G	G	T	G	G	G	G	G	preprotein translocase of IISP family
STM4293	4534338	63	C	C	C	C	T	C	C	C	C	putative integral membrane protein
STM4293	4533940	461	G	G	A	G	G	G	G	G	G	putative integral membrane protein
STM4363	4607562	1110	C	C	C	T	T	T	T	T	T	component of modulator for protease specific for FtsH phage lambda cII repressor
STM3877	4085946	732	T	T	T	A	A	A	A	A	A	asparagine synthetase A
STM2286	2394161	1066	G	G	G	G	A	G	G	G	G	sn-glycerol-3-phosphate dehydrogenase (anaerobic), K-small subunit
STM1826	1924332	973	C	C	C	C	C	T	T	T	T	L-serine deaminase I/L-threonine deaminase I
STM1828	1926417	82	G	G	G	G	A	G	G	G	G	putative inner membrane protein
STM1560	1640238	473	G	G	A	G	G	G	G	G	G	putative alpha amylase
STM1560	1639137	1574	T	T	T	T	T	T	T	T	C	putative alpha amylase
STM3038	3196840	742	A	A	A	A	A	G	A	A	A	putative metalloendopeptidase
STM4469	4711744	22	C	-	C	C	C	C	T	C	C	ornithine carbamoyltransferase 1
STM3390	3562068	969	G	G	G	G	G	A	A	A	A	transmembrane protein affecting septum formation and cell membrane permeability
STM2803	2949556	180	C	C	C	C	T	C	C	C	C	putative gntR family regulatory protein
STM2803	2949274	462	G	A	G	G	G	G	G	G	G	putative gntR family regulatory protein
STM2105	2187896	603	T	T	C	C	C	C	C	C	C	mannose-1-phosphate
STM2105	2187266	1233	C	C	C	C	C	C	T	T	T	mannose-1-phosphate
STM1225	1310302	872	G	G	A	A	A	A	A	A	A	spermidine/putrescine transporter
STM1222	1307187	482	C	C	C	T	C	C	C	C	C	spermidine/putrescine transporter
STM1824	1921655	505	T	C	T	T	T	T	T	T	T	p-aminobenzoate synthetase, component I
STM2375	2486952	47	A	A	A	A	C	A	A	A	A	putative cytoplasmic protein
STM0021	24852	391	A	A	A	A	G	A	A	A	A	fimbrial subunit
STM3346	3513090	463	C	C	C	C	T	T	T	T	T	putative ATPase
STM0217	255574	306	C	C	C	T	T	T	T	T	T	protein chain elongation factor EF-Ts
STM0217	255610	342	T	T	T	T	C	C	C	C	C	protein chain elongation factor EF-Ts
STM0217	255619	351	A	A	A	A	G	G	G	G	G	protein chain elongation factor EF-Ts
STM0217	255637	369	C	C	C	C	T	T	T	T	T	protein chain elongation factor EF-Ts
STM0217	255658	390	T	T	T	T	C	C	C	C	C	protein chain elongation factor EF-Ts
STM0217	255728	460	G	G	G	G	G	A	A	A	A	protein chain elongation factor EF-Ts
STM0217	255781	513	A	A	A	A	G	G	G	G	G	protein chain elongation factor EF-Ts
STM0217	256015	747	G	G	G	G	G	G	A	G	G	protein chain elongation factor EF-Ts
STM1139	1227480	535	C	C	A	C	C	C	C	C	C	putative transcriptional regulator in curly assembly/transport, 2nd curli operon
STM2397	2508012	486	G	G	G	G	G	A	G	G	G	protein for signal transmission
STM1775	1872079	414	A	A	A	G	G	G	G	G	G	putative protoporphyrinogen oxidase
STM1378	1459653	265	C	C	A	C	C	C	C	C	C	pyruvate kinase I
STM0246	286327	52	T	T	T	T	C	C	C	C	C	putative ABC superfamily (membrane) transport protein
STM0246	286317	62	T	T	T	T	C	C	C	C	C	putative ABC superfamily (membrane) transport protein
STM0246	286171	208	G	G	G	G	A	A	A	A	A	putative ABC superfamily (membrane) transport protein
STM0246	286152	227	C	C	C	T	C	C	C	C	C	putative ABC superfamily (membrane) transport protein
STM0246	286093	286	T	T	T	C	C	C	C	C	C	putative ABC superfamily (membrane) transport protein
STM0246	285925	454	A	A	A	G	G	G	G	G	G	putative ABC superfamily (membrane) transport protein
STM0246	285868	511	C	C	C	C	T	T	T	T	T	putative ABC superfamily (membrane) transport protein
STM0246	285778	601	T	T	T	C	T	T	T	T	T	putative ABC superfamily (membrane) transport protein
STM4273	4510043	1482	G	G	G	G	G	G	G	A	A	putative SSS family transport protein
STM1387	1473572	485	G	G	G	G	G	G	G	A	G	tetrathionate reductase complex: response regulator
STM1387	1473573	486	A	A	A	A	G	A	A	A	A	tetrathionate reductase complex: response regulator
STM1387	1473622	535	A	A	A	G	A	A	A	A	A	tetrathionate reductase complex: response regulator
STM1305	1384566	148	C	C	C	C	C	C	C	C	A	succinylglutamic semialdehyde dehydrogenase
STM1305	1384745	327	A	A	A	A	T	A	A	A	A	succinylglutamic semialdehyde dehydrogenase
STM1499	1575644	1302	G	G	G	G	T	G	G	G	G	putative dimethyl sulfoxide reductase, chain A1
STM0892	961611	394	G	G	G	G	G	A	A	A	A	putative lipoprotein
STM4245	4465272	288	G	G	G	G	A	G	G	G	G	NADPH dependent quinone oxidoreductase
STM4452	4691829	743	C	C	C	A	C	C	C	C	C	anaerobic ribonucleoside-triphosphate reductase
STM0484	541148	239	A	A	A	G	G	G	G	G	G	DNA polymerase III, tau and gamma subunits
STM0484	542775	1866	C	C	T	C	C	C	C	C	C	DNA polymerase III, tau and gamma subunits
STM2119	2204420	1115	T	T	T	C	C	C	C	C	C	putative inner membrane protein
STM1062	1153578	1598	A	A	A	A	T	T	T	T	T	putative ATPase component of ABC transporter
STM0385	438478	368	G	G	G	T	T	T	T	T	T	putative diguanylate cyclase/phosphodiesterase domain 1
STM1963	2052854	1205	G	G	G	A	A	A	A	A	A	cytoplasmic alpha-amylase
STM0618	680815	94	C	C	C	C	C	C	C	C	T	DASS family, citrate:succinate transport (antiport) protein
STM3280	3445581	612	T	T	T	C	C	C	C	C	C	cysteine sulfinate desulfinase
STM2312	2418958	180	G	G	G	G	G	G	G	A	G	putative acyltransferase
STM2144	2238558	29	A	A	A	G	G	G	G	G	G	putative sugar kinase
STM2144	2238615	86	G	G	G	G	G	G	G	G	A	putative sugar kinase
STM4483	4726878	315	C	C	C	T	C	C	C	C	C	5-keto-D-gluconate-5-reductase
STM3587	3755485	224	T	T	G	G	G	G	G	G	G	putative membrane protein
STM3012	3171923	264	G	G	G	G	A	G	G	G	G	putative transcriptional regulator
STM3012	3172507	848	C	C	C	C	C	C	T	C	C	putative transcriptional regulator
STM1712	1803193	1557	A	A	A	A	A	G	G	G	G	aconitate hydratase 1
STM1712	1802468	2282	G	G	G	A	G	G	G	G	G	aconitate hydratase 1
STM3628	3812226	121	C	C	T	C	C	C	C	C	C	dipeptide transport protein 2
STM3461	3612083	51	G	G	G	C	G	G	G	G	G	putative cytoplasmic protein
STM0939	1016028	174	G	G	G	A	G	G	G	G	G	homology with RecF protein
STM0939	1016053	199	C	C	C	C	C	C	C	T	C	homology with RecF protein
STM3200	3362155	412	C	C	C	C	T	C	C	C	C	putative sugar nucleotide transferase domain of ADP-L-glycero-D-manno-heptose synthase
STM4547	4806627	501	C	C	A	C	C	C	C	C	C	putative LuxR/UhpA family transcriptional regulator
STM1913	2007205	1005	A	A	A	A	A	A	A	A	G	flagellar biosynthesis protein
STM1913	2006576	1634	C	C	T	C	C	C	C	C	C	flagellar biosynthesis protein
STM1765	1862456	83	T	T	T	T	T	G	G	G	G	MFS superfamily nitrite extrusion protein
STM1765	1861141	1398	T	T	T	T	T	T	T	T	A	MFS superfamily nitrite extrusion protein
STM0493	551298	947	A	A	A	A	A	-	A	T	A	putative MFS family of transport protein
STM3979	4185684	520	G	G	G	G	G	-	A	A	A	FMN reductase
STM0230	269039	125	G	G	G	G	T	T	T	T	T	RNAse HII
STM0230	269042	128	T	T	T	T	C	C	C	C	C	RNAse HII
STM0230	269222	308	G	G	G	G	T	T	T	T	T	RNAse HII
STM0230	269269	355	A	A	A	A	C	C	C	C	C	RNAse HII
STM0230	269360	446	C	C	C	C	T	T	T	T	T	RNAse HII
STM3878	4085833	486	G	G	A	G	G	G	G	G	G	putative inner membrane protein
STM3878	4085511	808	A	A	G	G	G	G	G	G	G	putative inner membrane protein
STM1803	1902656	28	T	T	T	C	C	C	C	C	C	D-amino acid dehydrogenase subunit
STM1803	1902514	170	T	T	T	C	C	C	C	C	C	D-amino acid dehydrogenase subunit
STM1803	1901745	939	C	C	C	T	C	C	C	C	C	D-amino acid dehydrogenase subunit
STM2310	2416560	822	C	C	C	C	T	C	C	C	C	isochorismate synthase
STM1440	1516170	138	G	G	G	A	A	A	A	A	A	copper/zinc superoxide dismutase
STM0492	549989	365	C	C	C	T	C	C	C	C	C	putative CPA2 family transport protein
STM0492	548686	1668	G	G	G	G	G	G	A	A	A	putative CPA2 family transport protein
STM4264	4503449	1071	C	C	C	T	C	C	C	C	C	putative diguanylate cyclase/phosphodiesterase
STM1321	1401303	292	G	G	G	G	C	G	G	G	G	LexA regulated gene
STM3888	4098310	651	G	G	G	G	G	G	G	A	A	putative gntR family regulatory protein
STM4368	4611629	562	T	T	T	T	T	T	A	T	T	putative exoribonuclease
STM2127	2216008	502	T	T	G	G	G	G	G	G	G	putative outer membrane receptor
STM1494	1571165	88	G	G	A	G	G	G	G	G	G	ABC-type transport system protein
STM3235	3399800	220	C	C	C	A	A	A	A	A	A	putative LysR family transcriptional regulator
STM3235	3399251	769	G	G	G	A	G	G	G	G	G	putative LysR family transcriptional regulator
STM0649	712020	74	C	C	C	T	T	T	T	T	T	putative hydrolase N-terminus
STM1353	1433070	475	A	A	A	C	C	C	C	C	C	putative electron transfer flavoprotein
STM1353	1432870	675	G	G	G	G	G	A	G	G	G	putative electron transfer flavoprotein
STM1353	1432772	773	C	C	C	C	A	C	C	C	C	putative electron transfer flavoprotein
STM0736_sucA	802339	713	G	G	G	A	G	G	G	G	G	2-oxoglutarate dehydrogenase decarboxylase component
STM0736_sucA	802641	1015	T	T	T	C	C	C	C	C	C	2-oxoglutarate dehydrogenase decarboxylase component
STM0736_sucA	802945	1319	C	C	C	C	C	C	C	C	G	2-oxoglutarate dehydrogenase decarboxylase component
STM2167	2265003	1281	G	G	G	A	G	G	G	G	G	NADH independent D-lactate dehydrogenase
STM1471	1545635	763	C	C	C	C	A	C	C	C	C	sensory histidine kinase in two-component regulatory system with RstA
STM3322	3486334	76	G	G	G	A	G	G	G	G	G	sugar specific PTS family enzyme IIA
STM3189	3351999	166	G	G	G	G	A	G	G	G	G	putative cytoplasmic protein
STM1185	1267871	474	G	G	G	G	G	A	A	A	A	RNase E
STM1185	1266194	2151	A	G	G	G	G	G	G	G	G	RNase E
STM1185	1265299	3046	A	A	A	A	G	A	A	A	A	RNase E
STM1695	1787417	266	G	G	T	G	G	G	G	G	G	ABC superfamily peptide transport protein
STM1695	1788134	983	G	G	G	G	G	G	T	G	G	ABC superfamily peptide transport protein
STM3186	3349186	613	G	G	G	G	A	G	G	G	G	outer membrane channel
STM3186	3349998	1425	A	A	G	G	G	G	G	G	G	outer membrane channel
STM1234	1320680	900	A	A	G	G	G	G	G	G	G	tRNA (5-methylaminomethyl-2-thiouridylate)-methyltransferase
STM3403	3574487	187	C	C	C	C	T	T	T	T	T	putative DNA topoisomerase
STM3403	3574479	195	T	T	T	T	C	T	T	T	T	putative DNA topoisomerase
STM1211	1294407	81	T	T	T	T	T	T	A	T	T	respiratory NADH dehydrogenase 2
STM3611	3786292	305	C	C	C	C	C	A	A	A	A	putative diguanylate cyclase/phosphodiesterase domain 3 containing protein
STM1216	1298210	676	G	G	G	T	T	T	T	T	T	transcription-repair coupling factor
STM1216	1298109	777	G	G	G	G	G	A	A	A	A	transcription-repair coupling factor
STM1216	1297920	966	G	G	G	G	G	T	G	G	G	transcription-repair coupling factor
STM3664	3851251	742	C	C	C	A	C	C	C	C	C	alpha-amylase
STM4499	4752295	389	G	G	G	G	A	G	G	G	G	putative cytoplasmic protein
STM2784	2931619	745	G	G	G	G	T	G	G	G	G	tricarboxylic transport regulatory protein
STM3506	3664615	469	G	G	G	A	G	G	G	G	G	ferrous iron transport protein B
STM3506	3664942	796	G	G	G	G	G	A	A	A	A	ferrous iron transport protein B
STM2181	2277979	73	T	T	T	C	C	C	C	C	C	putative effector of murein hydrolase LrgA
STM2063	2136774	545	G	G	G	G	G	G	A	G	G	hydrogen sulfide production membrane anchoring protein
STM1559	1638115	71	C	C	C	C	C	C	A	C	C	putative glycosyl hydrolase
STM1559	1636503	1683	C	C	C	C	C	C	T	C	C	putative glycosyl hydrolase
STM1559	1636302	1884	T	T	T	T	T	C	T	T	T	putative glycosyl hydrolase
STM0734	798964	257	C	C	C	T	T	T	T	T	T	succinate dehydrogenase, flavoprotein subunit
STM3378	3549490	397	A	A	G	G	G	G	G	G	G	putative inner membrane protein
STM3407	3577645	194	G	G	A	G	G	G	G	G	G	10-formyltetrahydrofolate:L-methionyl-tRNA(fMet) N-formyltransferase
STM3407	3577828	377	G	G	G	G	G	T	T	T	T	10-formyltetrahydrofolate:L-methionyl-tRNA(fMet) N-formyltransferase
STM3407	3578364	913	T	T	T	A	T	T	T	T	T	10-formyltetrahydrofolate:L-methionyl-tRNA(fMet) N-formyltransferase
STM4380	4622672	470	C	C	C	T	C	C	C	C	C	putative hydrolase of the alpha/beta superfamily
STM1502	1580687	17	A	A	A	A	A	A	A	A	T	spermidine N1-acetyltransferase
STM3662	3848199	50	T	T	T	T	T	C	C	C	C	xylose operon regulatory protein
STM4443	4685024	35	C	C	C	T	C	C	C	C	C	putative inner membrane protein
STM0886	957581	1356	T	T	C	C	C	C	C	C	C	putative sulfatase
STM2175	2270798	972	G	G	G	G	A	G	G	G	G	putative monooxygenase
STM0931	1005708	36	C	C	C	T	C	C	C	C	C	putative aminidase
STM1543	1617494	820	T	T	T	T	A	T	T	T	T	putative transport protein
STM2282	2386781	749	A	A	A	A	G	G	G	G	G	periplasmic glycerophosphodiester phosphodiesterase
STM1988	2071431	187	T	C	T	T	T	T	T	T	T	putative cytoplasmic protein
STM2427	2538313	688	C	C	C	C	C	C	A	C	C	DNA ligase
STM3718	3913358	170	C	C	C	T	T	T	T	T	T	UDP-D-galactose:(glucosyl)lipopolysaccharide-alpha-1,3-D-galactosyltransferase
STM3718	3913105	423	A	A	A	A	G	A	A	A	A	UDP-D-galactose:(glucosyl)lipopolysaccharide-alpha-1,3-D-galactosyltransferase
STM0449	504715	643	T	T	T	G	G	G	G	G	G	specificity component of clpA-clpP ATP-dependent serine protease, chaperone
STM3264	3435040	1718	T	T	T	T	T	T	C	T	T	putative transglycosylase
STM0356	402096	214	T	T	T	C	C	C	C	C	C	putative inner membrane protein
STM0356	402111	229	G	G	G	G	A	A	A	A	A	putative inner membrane protein
STM0356	402114	232	C	C	C	T	C	C	C	C	C	putative inner membrane protein
STM0356	402159	277	G	G	G	A	G	G	G	G	G	putative inner membrane protein
STM0356	402249	367	T	T	T	C	C	C	C	C	C	putative inner membrane protein
STM0356	402252	370	T	T	T	C	C	C	C	C	C	putative inner membrane protein
STM0356	402393	511	C	C	C	T	T	T	T	T	T	putative inner membrane protein
STM0356	402411	529	T	T	T	C	C	C	C	C	C	putative inner membrane protein
STM0356	402421	539	G	G	G	G	A	A	A	A	A	putative inner membrane protein
STM0356	402522	640	G	G	G	A	A	A	A	A	A	putative inner membrane protein
STM0356	402570	688	C	C	C	T	C	C	C	C	C	putative inner membrane protein
STM0356	402678	796	G	G	G	C	G	G	G	G	G	putative inner membrane protein
STM0356	402810	928	C	C	C	T	C	C	C	C	C	putative inner membrane protein
STM0356	402855	973	T	T	T	A	A	A	A	A	A	putative inner membrane protein
STM0356	402861	979	G	G	G	A	G	G	G	G	G	putative inner membrane protein
STM0356	402900	1018	C	C	C	T	C	C	C	C	C	putative inner membrane protein
STM0356	402930	1048	G	G	G	G	C	C	C	C	C	putative inner membrane protein
STM0356	403110	1228	C	C	C	A	C	C	C	C	C	putative inner membrane protein
STM0356	403126	1244	A	A	A	G	A	A	A	A	A	putative inner membrane protein
STM0356	403129	1247	A	A	A	G	G	G	G	G	G	putative inner membrane protein
STM1124	1205322	2264	G	G	G	A	G	G	G	G	G	plasma membrane proline dehydrogenase
STM0084	96700	749	C	C	C	C	C	C	C	T	C	putative sulfatase
STM0245	285420	105	C	C	C	T	T	T	T	T	T	putative outer membrane lipoprotein
STM0245	285288	237	G	G	G	G	A	A	A	A	A	putative outer membrane lipoprotein
STM0245	285195	330	A	A	A	T	T	T	T	T	T	putative outer membrane lipoprotein
STM0245	285144	381	A	A	A	T	T	T	T	T	T	putative outer membrane lipoprotein
STM0245	285074	451	C	C	C	T	T	T	T	T	T	putative outer membrane lipoprotein
STM0245	285048	477	T	T	T	T	C	T	T	T	T	putative outer membrane lipoprotein
STM0245	285030	495	C	C	C	T	C	C	C	C	C	putative outer membrane lipoprotein
STM0245	284910	615	C	C	C	T	C	C	C	C	C	putative outer membrane lipoprotein
STM0245	284823	702	G	G	G	G	T	T	T	T	T	putative outer membrane lipoprotein
STM0245	284715	810	C	C	C	T	C	C	C	C	C	putative outer membrane lipoprotein
STM0546	606331	293	T	T	T	C	C	C	C	C	C	outer membrane usher protein
STM0546	606420	382	G	G	G	G	G	T	G	G	G	outer membrane usher protein
STM0546	606709	671	A	A	A	A	A	A	G	A	A	outer membrane usher protein
STM0546	606843	805	G	G	G	G	G	G	A	G	G	outer membrane usher protein
STM0546	607001	963	G	G	G	T	T	T	T	T	T	outer membrane usher protein
STM0546	607645	1607	C	C	T	C	C	C	C	C	C	outer membrane usher protein
STM0546	608012	1974	C	C	C	T	C	C	C	C	C	outer membrane usher protein
STM0973	1054548	552	C	C	C	T	C	C	C	C	C	pyruvate formate lyase I, induced anaerobically
STM3190	3353446	366	A	A	A	G	G	G	G	G	G	putative divalent heavy-metal cations transporter
STM1928	2023157	141	A	A	A	A	G	A	A	A	A	trehalose-6-phosphate synthase
STM1928	2022666	632	C	C	C	C	C	C	C	T	C	trehalose-6-phosphate synthase
STM1830	1928817	485	G	G	G	G	G	G	G	A	G	mannose-specific enzyme IIAB
STM2472	2578318	1661	G	G	G	G	G	A	G	G	G	putative transferase
STM2819	2968139	434	G	G	G	G	A	G	G	G	G	putative inner membrane protein
STM3614	3789689	594	C	C	C	C	C	T	C	C	C	DAACS family C4-dicarboxylic acids transport protein
STM1080	1170368	367	C	C	C	C	C	T	C	C	C	putative SAM-dependent methyltransferase
STM1080	1170226	509	G	G	G	A	G	G	G	G	G	putative SAM-dependent methyltransferase
STM1879	1970901	902	T	T	T	C	C	C	C	C	C	protease II
STM1879	1970119	1684	C	C	C	A	C	C	C	C	C	protease II
STM1537	1610953	343	G	G	G	G	G	A	G	G	G	putative Ni/Fe-hydrogenase 1 b-type cytochrome subunit
STM1537	1610741	555	C	C	C	C	C	T	C	C	C	putative Ni/Fe-hydrogenase 1 b-type cytochrome subunit
STM0942	1020086	371	A	A	A	C	A	A	A	A	A	putative ABC superfamily (atp&memb) transport protein
STM3022	3182878	350	C	C	C	T	T	T	T	T	T	putative transport protein
STM4591	4847001	829	C	C	C	C	C	T	T	T	T	putative major fimbrial subunit
STM2650	2789737	589	G	G	G	G	G	G	G	A	G	putative cytoplasmic protein
STM4154	4370586	575	A	C	C	C	C	C	C	C	C	RNA polymerase, beta prime subunit
STM4154	4371738	1727	C	C	C	C	C	T	C	C	C	RNA polymerase, beta prime subunit
STM3609	3783165	113	G	G	G	A	G	G	G	G	G	putative MFS family transport protein
STM0798	866162	1815	A	A	A	A	A	T	T	T	T	UvrB with UvrAC is a DNA excision repair enzyme
STM3610	3783992	435	C	C	C	C	C	A	C	C	C	putative inner membrane protein
STM3610	3783778	649	T	T	G	G	G	G	G	G	G	putative inner membrane protein
STM1148	1233644	165	T	C	C	C	C	C	C	C	C	putative phospholipase
STM0785	849263	91	C	C	C	T	C	C	C	C	C	putative 3-carboxymuconate cyclase
STM0340	384399	6	C	C	C	C	T	T	T	T	T	putative fimbriae; major subunit
STM0340	384382	23	G	G	G	A	A	A	A	A	A	putative fimbriae; major subunit
STM0340	384283	122	A	A	A	G	A	A	A	A	A	putative fimbriae; major subunit
STM0340	384235	170	G	G	G	G	A	A	A	A	A	putative fimbriae; major subunit
STM0340	384190	215	G	G	G	A	G	G	G	G	G	putative fimbriae; major subunit
STM0340	384031	374	C	C	C	C	T	T	T	T	T	putative fimbriae; major subunit
STM0340	383884	521	A	A	A	A	T	T	T	T	T	putative fimbriae; major subunit
STM2479	2588873	742	C	C	C	C	C	C	T	T	T	putative oxidoreductase
STM1260	1343887	94	C	C	C	C	C	C	C	C	A	putative inner membrane protein
STM1260	1343273	708	G	G	G	G	A	G	G	G	G	putative inner membrane protein
STM4229	4448804	541	A	A	A	A	A	G	G	G	G	maltose transport protein
STM4345	4587716	416	G	G	G	G	G	A	A	A	A	putative APC family amino-acid transport protein
STM3789	3988335	730	C	C	C	A	C	C	C	C	C	sensory histidine kinase in two-component regulatory sytem with UhpA
STM3789	3988026	1039	C	C	C	C	C	C	C	C	T	sensory histidine kinase in two-component regulatory sytem with UhpA
STM3922	4132207	532	T	T	C	C	C	C	C	C	C	dTDP-glucose 4,6-dehydratase
STM3922	4132529	854	G	G	G	G	G	A	G	G	G	dTDP-glucose 4,6-dehydratase
STM3922	4132530	855	G	G	G	G	G	A	G	G	G	dTDP-glucose 4,6-dehydratase
STM1558	1635259	795	C	C	C	C	C	C	T	C	C	putative glycosyl hydrolase
STM1558	1634770	1284	C	C	C	A	C	C	C	C	C	putative glycosyl hydrolase
STM1969	2056667	142	A	A	A	G	G	G	G	G	G	basal-body MS (membrane and supramembrane)-ring and collar protein
STM0757	821837	546	A	A	A	A	A	A	A	A	T	NMN family, nucleoside/purine/pyrimidine transporter
STM4465	4707052	233	T	T	T	C	C	C	C	C	C	putative ornithine carbamoyltransferase
STM2430	2544113	957	T	T	T	T	T	C	C	C	C	subunit of cysteine synthase A and O-acetylserine sulfhydrolase A
STM3613	3787845	731	T	T	T	T	C	T	T	T	T	putative Zn-dependent peptidase
STM3613	3787704	872	A	A	A	C	C	C	C	C	C	putative Zn-dependent peptidase
STM1241	1329312	145	G	G	G	G	G	T	T	T	T	macrophage survival gene; reduced mouse virulence
STM3501	3657165	1104	G	G	G	A	G	G	G	G	G	sensory histidine kinase in two-component regulatory system with OmpR
STM1063	1155151	1248	G	G	G	G	G	A	G	G	G	paraquat-inducible protein A
STM4168	4385731	511	C	T	C	C	C	C	C	C	C	endonuclease V
STM1908	2001779	10	G	G	G	A	G	-	G	G	G	putative cytoplasmic protein
STM1587	1673900	8	T	T	T	A	T	T	T	T	T	putative outer membrane receptor
STM1587	1673901	9	T	T	T	C	T	T	T	T	T	putative outer membrane receptor
STM2663	2807114	471	A	A	A	G	A	A	A	A	A	putative lipoprotein
STM3179	3343243	338	T	T	T	T	T	C	C	C	C	NADPH specific quinone oxidoreductase
STM3179	3343390	485	A	A	G	G	G	G	G	G	G	NADPH specific quinone oxidoreductase
STM2874	3016075	275	C	C	C	A	C	C	C	C	C	cell invasion protein
STM1099	1184275	1440	G	G	G	T	G	G	G	G	G	4-hydroxyphenylacetate catabolism protein
STM0617	679387	606	C	C	T	C	C	C	C	C	C	RNase I
STM0669	732540	700	C	C	C	C	C	T	C	C	C	putative phosphate starvation-inducible protein, ATP-binding
STM0585	641547	15	G	G	A	G	G	G	G	G	G	outer membrane porin, receptor for ferric enterobactin (enterochelin) and colicins B and D
STM0585	641516	46	T	T	T	T	T	T	C	T	T	outer membrane porin, receptor for ferric enterobactin (enterochelin) and colicins B and D
STM1609	1698635	305	C	C	C	T	T	-	T	T	T	K+-tellurite ethidium and proflavin transport protein
STM1609	1698565	375	C	C	C	C	C	-	T	T	T	K+-tellurite ethidium and proflavin transport protein
STM1138	1227565	121	C	C	C	T	C	C	C	C	C	putative inner membrane protein
STM1316	1395464	542	G	G	G	G	A	G	G	G	G	phospho-beta-glucosidase
STM1316	1395490	568	C	C	C	C	C	T	C	C	C	phospho-beta-glucosidase
STM0211	246990	330	T	T	T	C	T	T	T	T	T	putative cytoplasmic protein
STM0211	246927	393	T	T	T	C	T	T	T	T	T	putative cytoplasmic protein
STM0211	246924	396	G	G	G	A	G	G	G	G	G	putative cytoplasmic protein
STM0240	281270	51	T	T	T	T	C	C	C	C	C	putative-tRNA hydrolase domain protein
STM0240	281414	195	C	C	C	T	C	C	C	C	C	putative-tRNA hydrolase domain protein
STM0240	281429	210	T	T	T	C	C	C	C	C	C	putative-tRNA hydrolase domain protein
STM0240	281528	309	C	C	C	A	A	A	A	A	A	putative-tRNA hydrolase domain protein
STM0240	281545	326	A	A	A	G	G	G	G	G	G	putative-tRNA hydrolase domain protein
STM0240	281546	327	A	A	A	C	C	C	C	C	C	putative-tRNA hydrolase domain protein
STM0240	281579	360	G	G	G	A	A	A	A	A	A	putative-tRNA hydrolase domain protein
STM0240	281591	372	G	G	G	G	A	A	A	A	A	putative-tRNA hydrolase domain protein
STM0240	281597	378	G	G	G	A	A	A	A	A	A	putative-tRNA hydrolase domain protein
STM0185	215244	190	C	C	C	A	A	A	A	A	A	putative glutamyl t-RNA synthetase
STM0185	215062	372	G	G	G	A	A	A	A	A	A	putative glutamyl t-RNA synthetase
STM0185	215032	402	C	C	C	T	T	T	T	T	T	putative glutamyl t-RNA synthetase
STM0185	214928	506	T	T	T	C	C	C	C	C	C	putative glutamyl t-RNA synthetase
STM0185	214870	564	C	C	C	T	T	T	T	T	T	putative glutamyl t-RNA synthetase
STM2075	2154081	37	C	C	C	C	C	T	T	T	T	glutamine amidotransferase
STM0376	431235	888	C	C	C	C	C	T	T	T	T	putative ABC superfamily transporter
STM0376	431295	948	C	C	C	C	C	C	C	C	T	putative ABC superfamily transporter
STM2537	2677563	86	C	C	C	C	C	T	T	T	T	hypothetical protein
STM1844	1940006	51	C	C	C	C	C	T	C	C	C	heat shock protein
STM1844	1939359	698	G	G	G	A	G	G	G	G	G	heat shock protein
STM3887	4097491	31	G	G	G	G	G	G	T	G	G	putative MFS family tranport protein
STM3887	4097027	495	G	G	G	A	G	G	G	G	G	putative MFS family tranport protein
STM3887	4096247	1275	G	G	G	A	A	A	A	A	A	putative MFS family tranport protein
STM3097	3258744	87	G	G	G	G	A	G	G	G	G	putative endonuclease involved in recombination
STM1623	1710730	967	C	C	C	-	C	C	C	T	C	putative carboxylesterase
STM0206	241156	115	C	C	C	C	T	T	T	T	T	putative cobalamin periplasmic binding protein
STM0206	241102	169	G	G	G	G	A	A	A	A	A	putative cobalamin periplasmic binding protein
STM0206	241078	193	A	A	A	G	G	G	G	G	G	putative cobalamin periplasmic binding protein
STM0206	240932	339	C	C	C	G	C	C	C	C	C	putative cobalamin periplasmic binding protein
STM0206	240912	359	A	A	A	A	G	G	G	G	G	putative cobalamin periplasmic binding protein
STM0206	240904	367	T	T	T	C	C	C	C	C	C	putative cobalamin periplasmic binding protein
STM0206	240875	396	A	A	A	C	A	A	A	A	A	putative cobalamin periplasmic binding protein
STM0206	240658	613	G	G	G	A	G	G	G	G	G	putative cobalamin periplasmic binding protein
STM0206	240637	634	C	C	C	C	T	T	T	T	T	putative cobalamin periplasmic binding protein
STM0206	240570	701	C	C	C	T	T	T	T	T	T	putative cobalamin periplasmic binding protein
STM4568	4823446	1107	G	G	G	G	G	G	A	G	G	thymidine phosphorylase
STM1594	1683005	1923	C	C	C	C	C	T	T	T	T	ssrAB activated gene
STM1594	1683949	2867	G	G	G	T	G	G	G	G	G	ssrAB activated gene
STM1730	1826561	173	C	C	C	C	C	T	T	T	T	putative cytoplasmic protein
STM2154	2247829	635	A	A	A	G	G	G	G	G	G	putative ATP-binding protein
STM2917	3058716	740	C	C	C	C	A	C	C	C	C	putative tRNA synthase
STM1717	1814587	236	C	C	A	C	C	C	C	C	C	putative oxoacyl-(acyl carrier protein) reductase
STM3457	3607101	118	G	G	G	G	A	G	G	G	G	CPA2 family K+:H+ antiporter
STM2392	2503751	12	C	C	C	C	C	C	A	C	C	lipoprotein precursor
STM1414	1495656	2017	C	C	C	C	C	T	T	T	T	secretion system apparatus protein
STM4285	4524964	403	C	C	C	T	T	T	T	T	T	formate dehydrogenase [transl_except=(pos:418..420,aa:Sec)
STM1556	1634113	847	G	G	G	A	G	G	G	G	G	putative Na+/H+ antiporter
STM3504	3661752	633	G	G	G	A	G	G	G	G	G	putative RNase R
STM1420	1499516	142	C	C	C	C	C	T	C	C	C	secretion system apparatus
STM3340	3508909	246	G	G	G	A	A	A	A	A	A	putative gntR family regulatory protein
STM0966	1048436	52	C	C	C	T	C	C	C	C	C	anaerobic dimethyl sulfoxide reductase, subunit C
STM0261	301255	109	C	C	C	A	A	A	A	A	A	hydroxyacylglutathione hydrolase
STM0261	301165	199	A	A	A	G	G	G	G	G	G	hydroxyacylglutathione hydrolase
STM0261	300958	406	C	C	C	T	T	T	T	T	T	hydroxyacylglutathione hydrolase
STM0261	300895	469	C	C	C	T	T	T	T	T	T	hydroxyacylglutathione hydrolase
STM0261	300724	640	G	G	G	A	A	A	A	A	A	hydroxyacylglutathione hydrolase
STM0365	414279	535	C	C	C	T	T	T	T	T	T	putative transport protein
STM0365	414255	559	A	A	A	G	G	G	G	G	G	putative transport protein
STM0365	414252	562	A	A	A	T	T	T	T	T	T	putative transport protein
STM0365	414232	582	G	G	G	A	A	A	A	A	A	putative transport protein
STM4546	4804621	26	T	T	T	C	C	C	C	C	C	putative membrane protein
STM2480	2592600	855	T	T	T	C	C	C	C	C	C	sensory histidine kinase in two-component regulatory system with NarP (NarL)
STM2777	2923542	52	C	C	C	C	C	A	A	A	A	TonB-dependent siderophore receptor protein
STM2777	2922503	1091	C	C	C	C	T	C	C	C	C	TonB-dependent siderophore receptor protein
STM1749	1844660	1551	C	C	C	T	C	C	C	C	C	iron-dependent alcohol dehydrogenase of the multifunctional alcohol dehydrogenase AdhE
STM1749	1845659	2550	G	G	G	G	A	G	G	G	G	iron-dependent alcohol dehydrogenase of the multifunctional alcohol dehydrogenase AdhE
STM2263	2360569	193	G	A	G	G	G	G	G	G	G	putative ABC-type multidrug/protein/lipid transport system
STM3139	3301126	1229	T	T	T	T	T	C	C	C	C	glutathionylspermidine synthetase
STM4091	4298613	551	G	G	G	G	G	A	A	A	A	ATPase component of the HslUV protease
STM0612	676349	373	C	C	C	T	C	C	C	C	C	putative hydrogenase protein
STM4373	4616663	41	G	G	A	A	A	A	A	A	A	putative cytoplasmic protein
STM2333	2443071	923	G	G	G	G	A	G	G	G	G	putative response regulator
STM1150	1237559	1249	C	C	C	C	C	C	C	C	A	periplasmic glucans biosynthesis protein
STM2549	2687748	266	G	G	G	G	A	G	G	G	G	anaerobic sulfide reductase
STM3874	4081486	426	C	C	C	C	C	T	T	T	T	associated with glucose-inhibited division
STM3874	4080727	1185	C	C	C	C	C	T	C	C	C	associated with glucose-inhibited division
STM1386	1471622	289	C	C	C	T	C	C	C	C	C	tetrathionate reductase complex: sensory transduction histidine kinase
STM1274	1353125	6	G	G	A	A	A	A	A	A	A	putative inner membrane protein
STM1452	1525277	1165	A	A	A	A	T	A	A	A	A	putative POT family peptide transport protein
STM0307	350915	30	C	C	C	C	C	C	C	C	T	homology to Shigella VirG protein
STM0307	350584	361	A	A	A	A	G	G	G	G	G	homology to Shigella VirG protein
STM0307	350572	373	G	G	G	G	A	A	A	A	A	homology to Shigella VirG protein
STM3201	3363487	561	G	G	G	A	A	A	A	A	A	adenylyl transferase for glutamine synthetase
STM3201	3362572	1476	T	C	C	C	C	C	C	C	C	adenylyl transferase for glutamine synthetase
STM3201	3362290	1758	C	C	C	C	A	C	C	C	C	adenylyl transferase for glutamine synthetase
STM1426	1504037	509	G	G	G	G	G	T	T	T	T	riboflavin synthase, alpha chain
STM0360	409249	489	T	T	T	C	T	T	T	T	T	cytochrome BD2 subunit I
STM0360	409372	612	A	A	A	T	A	A	A	A	A	cytochrome BD2 subunit I
STM0360	409486	726	T	T	T	C	T	T	T	T	T	cytochrome BD2 subunit I
STM0360	409498	738	T	T	T	C	T	T	T	T	T	cytochrome BD2 subunit I
STM0360	409522	762	T	T	T	C	T	T	T	T	T	cytochrome BD2 subunit I
STM0360	409762	1002	C	C	C	T	C	C	C	C	C	cytochrome BD2 subunit I
STM0360	410056	1296	T	T	T	C	T	T	T	T	T	cytochrome BD2 subunit I
STM2548	2686548	112	T	T	T	T	T	T	G	G	G	anaerobic sulfide reductase
STM1117	1204051	376	C	C	C	T	C	C	C	C	C	glucose-1-phosphatase
STM4131	4350684	773	C	C	C	T	C	C	C	C	C	glutamate racemase
STM2460	2569379	645	A	A	A	G	G	G	G	G	G	putative transport protein
STM0533	595486	570	T	T	C	C	C	C	C	C	C	phosphoribosylaminoimidazole carboxylase = AIR carboxylase, CO(2)-fixing subunit
STM3913	4120810	1031	G	G	G	T	G	G	G	G	G	guanosine pentaphosphatase
STM1153	1240413	368	C	C	C	G	G	G	G	G	G	acidic protein suppresses mutants lacking function of protein export
STM0165	194084	118	C	C	C	C	C	G	G	G	G	S-adenosylmethionine decarboxylase, proenzyme
STM0165	193934	268	A	A	A	A	A	G	G	G	G	S-adenosylmethionine decarboxylase, proenzyme
STM2138	2232406	171	G	G	G	G	G	G	A	A	A	putative cytoplasmic protein
STM1106	1193199	46	T	T	T	T	T	T	A	T	T	4-hydroxyphenylacetate catabolism protein
STM4222	4442367	111	C	C	C	C	C	T	T	T	T	putative outer membrane protein
STM0187	216957	74	T	T	T	C	C	C	C	C	C	regulator for maltose metabolism
STM0187	216951	80	C	C	C	G	G	G	G	G	G	regulator for maltose metabolism
STM0187	216933	98	G	G	G	A	A	A	A	A	A	regulator for maltose metabolism
STM0187	216906	125	T	T	T	C	C	C	C	C	C	regulator for maltose metabolism
STM0187	216878	153	G	G	G	G	G	G	G	G	A	regulator for maltose metabolism
STM0187	216744	287	G	G	G	A	A	A	A	A	A	regulator for maltose metabolism
STM0187	216453	578	C	C	C	A	A	A	A	A	A	regulator for maltose metabolism
STM3220	3388182	180	G	G	G	A	G	G	G	G	G	putative methyltransferase
STM3013	3171891	811	A	A	A	A	A	C	A	A	A	diaminopimelate decarboxylase
STM1836	1932874	706	G	G	G	A	G	G	G	G	G	putative penicillin-binding protein-3
STM0429	482088	52	G	G	G	G	A	G	G	G	G	2-aminoethylphosphonate transporter, periplasmic-binding component
STM3705	3899999	888	T	T	C	T	T	T	T	T	T	putative membrane protein
STM1193	1277610	309	C	C	C	T	C	C	C	C	C	3-oxoacyl-[acyl-carrier-protein synthase III; acetylCoA ACP transacylase
STM0358	406305	1013	T	T	T	C	T	T	T	T	T	DNA restriction (DNA helicase)
STM0358	406394	1102	T	T	T	C	T	T	T	T	T	DNA restriction (DNA helicase)
STM0358	406530	1238	T	T	T	C	T	T	T	T	T	DNA restriction (DNA helicase)
STM0358	406685	1393	C	C	C	G	C	C	C	C	C	DNA restriction (DNA helicase)
STM0358	406934	1642	C	C	C	T	C	C	C	C	C	DNA restriction (DNA helicase)
STM0358	406967	1675	A	A	A	G	A	A	A	A	A	DNA restriction (DNA helicase)
STM0358	406998	1706	G	G	G	A	G	G	G	G	G	DNA restriction (DNA helicase)
STM0358	407102	1810	G	G	G	A	G	G	G	G	G	DNA restriction (DNA helicase)
STM0358	407210	1918	G	G	G	A	G	G	G	G	G	DNA restriction (DNA helicase)
STM0358	407285	1993	C	C	C	T	C	C	C	C	C	DNA restriction (DNA helicase)
STM0358	407312	2020	A	A	A	G	A	A	A	A	A	DNA restriction (DNA helicase)
STM0358	407411	2119	G	G	G	T	G	G	G	G	G	DNA restriction (DNA helicase)
STM0358	407415	2123	C	C	C	T	C	C	C	C	C	DNA restriction (DNA helicase)
STM0358	407612	2320	C	C	C	T	C	C	C	C	C	DNA restriction (DNA helicase)
STM0358	407687	2395	C	C	C	T	C	C	C	C	C	DNA restriction (DNA helicase)
STM0358	407733	2441	A	A	A	G	A	A	A	A	A	DNA restriction (DNA helicase)
STM0358	407783	2491	C	C	C	T	C	C	C	C	C	DNA restriction (DNA helicase)
STM0358	407858	2566	A	A	A	G	A	A	A	A	A	DNA restriction (DNA helicase)
STM0358	408032	2740	A	A	A	G	A	A	A	A	A	DNA restriction (DNA helicase)
STM0358	408224	2932	G	G	G	A	G	G	G	G	G	DNA restriction (DNA helicase)
STM0358	408239	2947	C	C	C	G	C	C	C	C	C	DNA restriction (DNA helicase)
STM4556	4810944	213	G	A	G	G	G	G	G	G	G	16S ribosomal rRNA
STM4556	4810136	1021	A	A	A	A	G	A	A	A	A	16S ribosomal rRNA
STM0317	362964	303	C	C	C	C	T	T	T	T	T	guanine-hypoxanthine phosphoribosyltransferase
STM0317	363087	426	A	A	A	G	A	A	A	A	A	guanine-hypoxanthine phosphoribosyltransferase
STM0317	363093	432	C	C	C	T	C	C	C	C	C	guanine-hypoxanthine phosphoribosyltransferase
STM0317	363105	444	T	T	T	T	G	G	G	G	G	guanine-hypoxanthine phosphoribosyltransferase
STM3142	3305621	461	A	A	A	G	G	G	G	G	G	putative ferrichrome-binding periplasmic protein
STM3415	3582334	975	A	T	A	A	A	A	A	A	A	RNA polymerase, alpha subunit
STM2807	2954074	1605	T	T	T	G	G	G	G	G	G	ribonucleoside diphosphate reductase 2, alpha subunit
STM2807	2954486	2017	C	C	C	T	T	T	T	T	T	ribonucleoside diphosphate reductase 2, alpha subunit
STM4249	4470697	10	C	C	C	C	C	T	T	T	T	non-specific acid phosphatase/phosphotransferase, class B
STM4249	4470806	119	T	T	T	T	T	C	T	T	T	non-specific acid phosphatase/phosphotransferase, class B
STM1135	1225938	895	A	A	A	A	T	A	A	A	A	putative oxidoreductase
STM2062	2135426	597	A	A	A	A	A	A	A	G	A	DD-carboxypeptidase
STM4108	4321664	1053	G	A	G	G	G	G	G	G	G	glycerol dehydrogenase, NAD
STM0063	73792	870	C	C	C	T	C	C	C	C	C	putative modifier of citrate lyase protein
STM0357	403423	98	T	T	T	C	T	T	T	T	T	DNA methylase; restriction system
STM0357	403497	172	C	C	C	T	C	C	C	C	C	DNA methylase; restriction system
STM0357	403553	228	T	T	T	C	C	C	C	C	C	DNA methylase; restriction system
STM0357	403637	312	T	T	T	T	C	C	C	C	C	DNA methylase; restriction system
STM0357	403667	342	A	A	A	A	G	G	G	G	G	DNA methylase; restriction system
STM0357	403754	429	A	A	A	G	A	A	A	A	A	DNA methylase; restriction system
STM0357	403769	444	C	C	C	C	T	T	T	T	T	DNA methylase; restriction system
STM0357	403838	513	G	G	G	G	A	A	A	A	A	DNA methylase; restriction system
STM0357	404015	690	T	T	T	C	C	C	C	C	C	DNA methylase; restriction system
STM0357	404096	771	C	C	C	T	C	C	C	C	C	DNA methylase; restriction system
STM0357	404108	783	T	T	T	C	T	T	T	T	T	DNA methylase; restriction system
STM0357	404198	873	T	T	T	A	A	A	A	A	A	DNA methylase; restriction system
STM0357	404213	888	C	C	C	C	G	G	G	G	G	DNA methylase; restriction system
STM0357	404378	1053	T	T	T	T	A	A	A	A	A	DNA methylase; restriction system
STM0357	404420	1095	G	G	G	A	G	G	G	G	G	DNA methylase; restriction system
STM0357	404447	1122	A	A	A	C	A	A	A	A	A	DNA methylase; restriction system
STM0357	404555	1230	C	C	C	T	C	C	C	C	C	DNA methylase; restriction system
STM0357	404600	1275	C	C	C	T	C	C	C	C	C	DNA methylase; restriction system
STM0357	404663	1338	C	C	C	T	C	C	C	C	C	DNA methylase; restriction system
STM0357	404798	1473	T	T	T	C	T	T	T	T	T	DNA methylase; restriction system
STM2272	2371616	2095	A	A	A	G	G	G	G	G	G	DNA gyrase, subunit A
STM3114	3271663	1118	A	A	C	A	A	A	A	A	A	ornithine decarboxylase isozyme
STM2064	2137757	323	G	G	G	G	G	G	A	G	G	hydrogen sulfide production iron-sulfur subunit
STM0223	261094	107	C	C	C	T	C	C	C	C	C	putative membrane-associated Zn-dependent protease
STM0223	261571	584	C	C	C	T	T	T	T	T	T	putative membrane-associated Zn-dependent protease
STM0223	261661	674	C	C	C	T	T	T	T	T	T	putative membrane-associated Zn-dependent protease
STM0223	261721	734	A	A	A	G	A	A	A	A	A	putative membrane-associated Zn-dependent protease
STM0223	262225	1238	G	G	G	A	G	G	G	G	G	putative membrane-associated Zn-dependent protease
STM0980	1064846	44	G	G	A	G	G	G	G	G	G	cytidine monophosphate (CMP) kinase
STM1360	1441123	222	G	G	G	G	C	C	C	C	C	putative MFS family transport protein
STM1360	1440257	1088	A	A	T	A	A	A	A	A	A	putative MFS family transport protein
STM1360	1440250	1095	G	G	G	G	A	G	G	G	G	putative MFS family transport protein
STM0665	728787	126	G	G	G	A	G	G	G	G	G	glutamate/aspartate transporter
STM3949	4154352	568	C	C	C	C	T	C	C	C	C	putative site-specific integrase/recombinase
STM1706	1800089	167	C	C	C	T	C	C	C	C	C	putative translation initiation factor SUI1
STM0652	714688	148	A	A	A	G	G	G	G	G	G	putative sigma-54 dependent transcriptional regulator
STM0652	715046	506	C	C	C	T	C	C	C	C	C	putative sigma-54 dependent transcriptional regulator
STM0470	526692	77	A	A	A	G	A	A	A	A	A	putative 50S ribosomal protein L36 (second copy)
STM0127	149658	957	G	G	G	A	G	G	G	G	G	essential cell division gene
STM2065	2138628	45	G	G	G	G	G	A	A	A	A	hydrogen sulfide production membrane anchoring protein
STM2065	2138534	139	C	C	C	C	G	G	G	G	G	hydrogen sulfide production membrane anchoring protein
STM2065	2137487	1186	T	C	C	C	C	C	C	C	C	hydrogen sulfide production membrane anchoring protein
STM2065	2137234	1439	G	G	G	A	G	G	G	G	G	hydrogen sulfide production membrane anchoring protein
STM4310	4558195	8	A	A	A	A	G	A	A	A	A	putative inner membrane protein
STM2273	2376622	135	A	A	A	A	G	A	A	A	A	putative dehydratase protein
STM2273	2376468	289	G	G	G	G	G	G	A	A	A	putative dehydratase protein
STM2273	2376196	561	T	T	T	C	T	T	T	T	T	putative dehydratase protein
STM3052	3210758	37	G	G	G	G	G	G	A	G	G	putative outer membrane protein
STM2191	2288093	21	T	T	T	T	G	T	T	T	T	GalR/LacI family transcriptional repressor of mgl operon
STM2191	2287709	405	T	T	T	C	C	C	C	C	C	GalR/LacI family transcriptional repressor of mgl operon
STM2191	2287617	497	T	T	T	T	T	A	A	A	A	GalR/LacI family transcriptional repressor of mgl operon
STM4398	4635508	659	G	G	G	G	G	G	T	G	G	APC family D-alanine/D-serine/glycine transport protein
STM2572	2718395	819	A	A	G	G	G	G	G	G	G	putative ABC superfamily transport protein
STM3425	3588591	285	A	A	A	G	G	G	G	G	G	50S ribosomal subunit protein L6
STM3391	3562677	411	G	G	G	G	G	G	A	G	G	RND family multidrug transport protein
STM3391	3564833	2567	A	A	A	A	G	A	A	A	A	RND family multidrug transport protein
STM3391	3565147	2881	A	A	A	A	G	A	A	A	A	RND family multidrug transport protein
STM3879	4087553	211	A	A	G	G	G	G	G	G	G	putative regulator protein
STM3879	4086839	925	C	C	C	C	C	C	T	C	C	putative regulator protein
STM1911	2006149	293	C	C	C	A	A	A	A	A	A	putative cytoplasmic protein
STM1911	2005826	616	A	A	A	A	A	A	T	A	A	putative cytoplasmic protein
STM0216	254648	364	G	G	G	G	A	A	A	A	A	30S ribosomal subunit protein S2
STM0631	693951	310	C	T	C	C	C	C	C	C	C	putative hydrolase
STM0631	694263	622	G	G	G	G	G	G	G	G	T	putative hydrolase
STM1909	2003257	675	A	A	A	A	A	A	A	A	T	arginine tRNA synthetase
STM3451	3603442	52	C	C	C	C	C	T	T	T	T	putative ACR involved in intracellular sulfur reduction
STM3451	3603147	347	G	G	G	G	A	G	G	G	G	putative ACR involved in intracellular sulfur reduction
STM4009	4217916	531	T	T	T	C	C	C	C	C	C	GTP-binding elongation factor family protein
STM2285	2392756	917	A	C	C	C	C	C	C	C	C	sn-glycerol-3-phosphate dehydrogenase (anaerobic), membrane anchor subunit
STM1306	1387194	1295	C	C	C	T	T	T	T	T	T	succinylarginine dihydrolase
STM3742	3935580	1510	C	C	C	T	T	T	T	T	T	(p)ppGpp synthetase II
STM0073	85124	386	A	A	A	C	C	C	C	C	C	putative acyl-CoA dehydrogenase, carnitine metabolism
STM0866	939075	586	C	C	C	C	C	C	C	T	T	multidrug translocase
STM0028	31875	606	C	C	C	C	C	A	A	A	A	putative thiol-disulfide isomerase
STM1437	1513707	367	C	C	C	C	C	G	G	G	G	putative TetR/AcrR family transcriptional repressor
STM0710	775535	707	G	G	G	G	G	A	G	G	G	putative POT family transport protein
STM0348	391754	52	A	A	A	T	A	A	A	A	A	putative inner membrane protein
STM0348	391810	108	A	A	A	G	G	G	G	G	G	putative inner membrane protein
STM1352	1431564	638	C	C	C	A	C	C	C	C	C	flavoprotein
STM1352	1431106	1096	A	A	A	G	G	G	G	G	G	flavoprotein
STM1577	1662831	2164	C	C	C	C	C	C	A	C	C	nitrate reductase 2, alpha subunit
STM4129	4345736	914	A	A	A	A	A	G	G	G	G	tRNA (uracil-5-)-methyltransferase
STM0591	651570	10	A	G	G	G	G	G	G	G	G	ferric enterobactin transporter
STM0591	651456	124	G	G	G	A	G	G	G	G	G	ferric enterobactin transporter
STM0591	651081	499	T	T	T	T	T	T	C	C	C	ferric enterobactin transporter
STM0404	459801	241	C	C	C	T	C	C	C	C	C	S-adenosylmethionine-tRNA ribosyltransferase-isomerase
STM1192	1276953	828	C	C	C	C	C	A	A	A	A	putative fatty acid/phospholipid synthesis protein
STM0219	257304	169	T	T	T	T	C	C	C	C	C	ribosome releasing factor
STM0219	257544	409	C	C	C	T	T	T	T	T	T	ribosome releasing factor
STM0219	257661	526	G	G	G	T	T	T	T	T	T	ribosome releasing factor
STM0392	442047	884	A	A	A	G	A	A	A	A	A	putative exonuclease involved in removal of stalled replication fork
STM2953	3097429	1324	C	C	C	G	C	C	C	C	C	CTP synthetase
STM4563	4817768	854	C	C	C	A	C	C	C	C	C	putative phosphoesterase
STM1105	1193038	703	C	C	C	C	C	C	T	T	T	4-hydroxyphenylacetate catabolism protein
STM1105	1193126	791	C	C	C	T	T	T	T	T	T	4-hydroxyphenylacetate catabolism protein
STM2976	3128864	651	G	G	G	G	G	A	A	A	A	L-fucose isomerase
STM2976	3128999	786	G	G	G	A	G	G	G	G	G	L-fucose isomerase
STM2976	3129439	1226	G	G	G	G	G	A	A	A	A	L-fucose isomerase
STM1905	1999369	310	C	C	C	C	C	C	T	T	T	putative SAM-dependent methyltransferase
STM1576	1660228	1038	G	G	G	G	A	G	G	G	G	MFS superfamily nitrate extrusion protein
STM3318	3483268	202	A	A	A	G	G	G	G	G	G	putative ABC superfamily transport protein
STM4098	4306590	308	T	T	T	C	C	C	C	C	C	putative arylsulfate sulfotransferase
STM1766	1864359	200	G	G	G	T	G	G	G	G	G	sensory histidine kinase in two component regulatory system with NarL
STM1766	1864546	387	G	G	G	A	G	G	G	G	G	sensory histidine kinase in two component regulatory system with NarL
STM1766	1864677	518	G	G	G	G	G	G	A	G	G	sensory histidine kinase in two component regulatory system with NarL
STM3110	3269197	506	A	A	A	G	A	A	A	A	A	adenine DNA glycosylase
STM4543	4802797	14	G	G	G	G	G	A	G	G	G	chromosome replication protein
STM2338	2451353	2148	T	T	T	C	C	C	C	C	C	phosphotransacetylase
STM2338	2451355	2150	A	A	A	G	G	G	G	G	G	phosphotransacetylase
STM0346	390478	96	T	T	T	C	T	T	T	T	T	putative outer membrane protein; homolog of ail and ompX
STM0346	390589	207	C	C	C	C	A	A	A	A	A	putative outer membrane protein; homolog of ail and ompX
STM0346	390781	399	G	G	G	C	C	C	C	C	C	putative outer membrane protein; homolog of ail and ompX
STM0346	390796	414	C	C	C	T	C	C	C	C	C	putative outer membrane protein; homolog of ail and ompX
STM0346	390865	483	T	T	T	C	C	C	C	C	C	putative outer membrane protein; homolog of ail and ompX
STM4235	4456090	107	C	C	C	C	C	C	C	T	T	glycerolphosphate acyltransferase activity
STM4413	4652135	1049	C	C	A	A	A	A	A	A	A	putative imidazolonepropionase and related amidohydrolases
STM0984	1070614	189	G	G	G	G	G	G	T	G	G	multicopy repressor of htrB transport protein; ABC superfamily (atp&membrane)
STM0227	266695	172	G	G	G	A	G	G	G	G	G	(3R)-hydroxymyristol acyl carrier protein dehydratase
STM0227	266785	262	T	T	T	G	T	T	T	T	T	(3R)-hydroxymyristol acyl carrier protein dehydratase
STM0227	266930	407	T	T	T	C	C	C	C	C	C	(3R)-hydroxymyristol acyl carrier protein dehydratase
STM0227	266947	424	C	C	C	T	T	T	T	T	T	(3R)-hydroxymyristol acyl carrier protein dehydratase
STM0010	9972	121	C	C	C	T	T	T	T	T	T	positive sigma H regulator
STM3021	3182252	354	A	A	A	C	C	C	C	C	C	putative inner membrane protein
STM3183	3345669	802	C	C	T	C	C	C	C	C	C	cyclic 3',5'-adenosine monophosphate phosphodiesterase
STM2217	2318228	215	G	G	G	G	G	G	A	G	G	putative ABC-type dipeptide/oligopeptide/nickel transport systems, permease component
STM2217	2318653	640	G	G	G	A	G	G	G	G	G	putative ABC-type dipeptide/oligopeptide/nickel transport systems, permease component
STM2897	3039528	962	A	A	A	C	A	A	A	A	A	invasion protein
STM3187	3350788	540	C	C	C	C	C	G	G	G	G	putative inner membrane protein
STM0842	911201	752	A	A	A	A	A	T	T	T	T	putative hydrolase of the HAD superfamily
STM2198	2296173	996	A	A	A	G	G	-	G	G	G	putative regulatory protein
STM2198	2296324	1147	G	G	G	A	G	-	G	G	G	putative regulatory protein
STM2198	2296490	1313	A	A	G	G	G	-	G	G	G	putative regulatory protein
STM1849	1946267	413	T	C	C	C	C	C	C	C	C	putative inner membrane protein
STM2969	3119409	572	T	T	T	T	T	A	A	A	A	putative nucleotide binding
STM3193	3356447	131	C	C	C	C	C	C	T	T	T	putative thiol-disulfide isomerase and thioredoxin
STM3193	3356980	664	G	G	G	A	A	A	A	A	A	putative thiol-disulfide isomerase and thioredoxin
STM3010	3166132	1747	C	C	C	C	C	C	T	C	C	2-acylglycerophospho-ethanolamine acyl transferase
STM3003	3158942	974	T	T	T	C	C	C	C	C	C	general PTS system enzyme I, transcriptional regulator with NPR and NTR proteins
STM3723	3917635	237	C	T	C	C	C	C	C	C	C	lipopolysaccharide core biosynthesis protein
STM0791	857384	734	G	G	G	G	G	A	A	A	A	histidine ammonia lyase
STM0791	857771	1121	C	C	T	C	C	C	C	C	C	histidine ammonia lyase
STM0337	379541	166	A	A	A	G	G	G	G	G	G	putative fimbriae; usher
STM0337	379504	203	G	G	G	A	G	G	G	G	G	putative fimbriae; usher
STM0337	379487	220	A	A	A	A	T	T	T	T	T	putative fimbriae; usher
STM0337	379469	238	G	G	G	A	A	A	A	A	A	putative fimbriae; usher
STM0337	379468	239	C	C	C	T	C	C	C	C	C	putative fimbriae; usher
STM0337	379453	254	T	T	T	A	A	A	A	A	A	putative fimbriae; usher
STM0337	379424	283	C	C	C	C	A	A	A	A	A	putative fimbriae; usher
STM0337	379384	323	A	A	A	T	A	A	A	A	A	putative fimbriae; usher
STM0337	379382	325	T	T	T	T	C	C	C	C	C	putative fimbriae; usher
STM0337	379292	415	C	C	C	C	T	T	T	T	T	putative fimbriae; usher
STM0337	379223	484	T	T	T	T	C	C	C	C	C	putative fimbriae; usher
STM0337	379193	514	C	C	C	T	C	C	C	C	C	putative fimbriae; usher
STM0337	379135	572	C	C	C	T	C	C	C	C	C	putative fimbriae; usher
STM0337	379006	701	A	A	A	C	A	A	A	A	A	putative fimbriae; usher
STM0337	378964	743	A	A	A	G	A	A	A	A	A	putative fimbriae; usher
STM0337	378827	880	C	C	C	C	T	T	T	T	T	putative fimbriae; usher
STM0337	378788	919	C	C	C	C	T	T	T	T	T	putative fimbriae; usher
STM0337	378785	922	C	C	C	T	C	C	C	C	C	putative fimbriae; usher
STM0337	378671	1036	C	C	C	T	C	C	C	C	C	putative fimbriae; usher
STM0337	378623	1084	T	T	T	C	T	T	T	T	T	putative fimbriae; usher
STM0337	378506	1201	C	C	C	T	C	C	C	C	C	putative fimbriae; usher
STM0337	378497	1210	C	C	C	A	A	A	A	A	A	putative fimbriae; usher
STM0337	378473	1234	T	T	T	C	C	C	C	C	C	putative fimbriae; usher
STM0337	378446	1261	A	A	A	G	G	G	G	G	G	putative fimbriae; usher
STM0337	378410	1297	A	A	A	G	G	G	G	G	G	putative fimbriae; usher
STM1890	1984693	385	C	C	T	C	C	C	C	C	C	putative peptidase
STM1890	1984434	644	C	C	C	C	C	C	T	C	C	putative peptidase
STM4590	4846798	389	C	C	C	C	T	T	T	T	T	tolerance to colicin E2 protein
STM4086	4293966	390	A	G	G	G	G	G	G	G	G	glycerol kinase
STM0170	201295	492	C	C	C	T	C	C	C	C	C	hypoxanthine phosphoribosyltransferase
STM0873	945660	161	C	C	C	C	T	C	C	C	C	putative inner membrane protein
STM2220	2321559	189	A	A	A	A	G	A	A	A	A	putative cytoplasmic protein
STM1488	1565998	918	A	A	A	A	A	G	G	G	G	transcriptional repressor of ptsG and ptsHI
STM0804	872440	285	C	C	C	C	C	C	C	T	T	molybdopterin biosynthesis, protein C
STM0263	302800	73	T	C	C	C	C	C	C	C	C	RNase HI
STM0263	302676	197	A	A	A	A	C	C	C	C	C	RNase HI
STM0263	302547	326	G	G	G	C	C	C	C	C	C	RNase HI
STM0263	302520	353	T	T	T	C	C	C	C	C	C	RNase HI
STM0263	302427	446	C	C	C	T	T	T	T	T	T	RNase HI
STM0263	302394	479	G	G	G	A	A	A	A	A	A	RNase HI
STM3115	3275755	427	C	C	C	C	C	A	A	A	A	putative inner membrane protein
STM1986	2069453	517	C	C	C	T	C	C	C	C	C	putative hydrolase of the HAD superfamily
STM3040	3198849	377	C	C	C	T	T	T	T	T	T	constitutive lysine tRNA synthetase
STM4323	4567054	345	C	C	C	C	C	T	T	T	T	thiol:disulfide interchange protein
STM4323	4566551	848	C	C	C	C	A	C	C	C	C	thiol:disulfide interchange protein
STM2859	3004425	730	C	C	C	T	C	C	C	C	C	formate hydrogen-lyase transcriptional activator for fdhF, hyc and hyp operons
STM2488	2602245	747	C	C	C	C	C	T	T	T	T	lipoprotein-34
STM1914	2009275	1006	A	A	A	A	A	A	T	A	A	putative part of export apparatus for flagellar proteins
STM4334	4579682	66	C	C	C	C	T	C	C	C	C	elongation factor P
STM1125	1212614	711	C	C	T	C	C	C	C	C	C	SSS family major sodium/proline symporter
STM1212	1296064	152	G	G	G	G	G	G	G	G	A	putative outer membrane lipoprotein
STM1308	1388823	292	T	T	C	C	C	C	C	C	C	periplasmic protein related to spheroblast formation
STM1394	1481649	1263	G	G	G	G	G	G	T	G	G	secretion system apparatus protein
STM4016	4224952	72	G	G	G	G	G	G	A	G	G	putative outer membrane protein
STM4016	4224850	174	T	T	T	T	T	C	T	T	T	putative outer membrane protein
STM4016	4224562	462	T	T	T	T	C	T	T	T	T	putative outer membrane protein
STM4016	4224535	489	T	T	T	T	T	C	T	T	T	putative outer membrane protein
STM2519	2650363	1095	C	C	C	C	T	-	C	C	C	putative GTP-binding protein
STM3967	4173223	584	A	T	A	A	A	A	A	A	A	putative dienelactone hydrolase family
STM1615	1705316	806	T	G	G	G	G	G	G	G	G	putative nucleoside triphosphatase
STM3067	3228028	403	C	C	C	C	C	C	C	C	A	putative membrane protein
STM1370	1453202	531	C	C	T	C	C	C	C	C	C	putative ABC transporter
STM1370	1453563	892	C	C	C	C	T	C	C	C	C	putative ABC transporter
STM0222	260122	9	T	T	T	C	T	T	T	T	T	CDP-diglyceride synthase
STM0222	260258	145	A	A	A	G	A	A	A	A	A	CDP-diglyceride synthase
STM0222	260609	496	T	T	T	C	T	T	T	T	T	CDP-diglyceride synthase
STM0222	260801	688	G	G	G	A	G	G	G	G	G	CDP-diglyceride synthase
STM0242	281949	520	G	G	G	A	G	G	G	G	G	proline tRNA synthetase
STM0242	281823	646	C	C	C	C	C	T	T	T	T	proline tRNA synthetase
STM0242	281691	778	G	G	G	A	G	G	G	G	G	proline tRNA synthetase
STM0242	281646	823	G	G	G	A	A	A	A	A	A	proline tRNA synthetase
STM0242	281596	873	C	C	C	T	T	T	T	T	T	proline tRNA synthetase
STM0242	281463	1006	A	A	A	G	G	G	G	G	G	proline tRNA synthetase
STM0242	281454	1015	C	C	C	C	T	T	T	T	T	proline tRNA synthetase
STM0242	281423	1046	T	T	T	C	C	C	C	C	C	proline tRNA synthetase
STM0242	281364	1105	C	C	C	T	T	T	T	T	T	proline tRNA synthetase
STM0242	281259	1210	T	T	T	C	C	C	C	C	C	proline tRNA synthetase
STM0242	281160	1309	T	T	T	C	T	T	T	T	T	proline tRNA synthetase
STM0242	281139	1330	T	T	T	C	C	C	C	C	C	proline tRNA synthetase
STM0242	281127	1342	C	C	C	C	A	A	A	A	A	proline tRNA synthetase
STM0242	281124	1345	C	C	C	C	T	T	T	T	T	proline tRNA synthetase
STM0242	281121	1348	T	T	T	C	C	C	C	C	C	proline tRNA synthetase
STM0242	281091	1378	G	G	G	A	A	A	A	A	A	proline tRNA synthetase
STM0242	280803	1666	C	C	C	C	T	T	T	T	T	proline tRNA synthetase
STM0242	280746	1723	G	G	G	G	C	C	C	C	C	proline tRNA synthetase
STM0941	1018954	351	C	C	C	C	T	T	T	T	T	putative membrane protein
STM0221	259397	61	G	G	G	A	A	-	A	A	A	undecaprenyl pyrophosphate synthetase (di-trans, poly-cis-decaprenylcistransferase)
STM0221	259418	82	A	A	A	C	C	-	C	C	C	undecaprenyl pyrophosphate synthetase (di-trans, poly-cis-decaprenylcistransferase)
STM0221	259760	424	G	G	G	T	T	-	T	T	T	undecaprenyl pyrophosphate synthetase (di-trans, poly-cis-decaprenylcistransferase)
STM1357	1437644	216	A	A	A	G	A	A	A	A	A	putative acetyl-CoA:acetoacetyl-CoA transferase beta subunit
STM1357	1436407	1453	A	A	A	A	T	A	A	A	A	putative acetyl-CoA:acetoacetyl-CoA transferase beta subunit
STM1702	1795310	1153	G	G	G	G	G	G	A	G	G	RNase II
STM4153	4368272	2362	A	A	A	A	G	A	A	A	A	RNA polymerase, beta subunit
STM4153	4369430	3520	G	G	G	G	A	A	A	A	A	RNA polymerase, beta subunit
STM4153	4369632	3722	T	T	T	C	C	C	C	C	C	RNA polymerase, beta subunit
STM4153	4369698	3788	G	G	G	G	G	G	G	G	T	RNA polymerase, beta subunit
STM1344	1423376	596	G	G	G	A	G	G	G	G	G	putative diguanylate cyclase/phosphodiesterase domain 1
STM2274	2377963	11	G	G	G	G	A	G	G	G	G	putative permease
STM0735	800880	387	G	G	T	G	G	G	G	G	G	succinate dehydrogenase, Fe-S protein
STM3196	3358890	10	A	A	A	G	G	G	G	G	G	putative cytoplasmic protein
STM2781	2928516	140	G	G	G	A	A	A	A	A	A	virK-like protein
STM3149	3311594	69	C	C	C	T	C	C	C	C	C	unknown
STM1937	2030286	16	A	A	A	A	T	A	A	A	A	HAAAP family tyrosine-specific transport protein
STM1285	1361088	732	G	G	G	A	A	A	A	A	A	putative Ser protein kinase
STM1285	1360917	903	G	G	A	G	G	G	G	G	G	putative Ser protein kinase
STM2815	2963221	263	G	G	G	G	G	T	G	G	G	putative MFS superfamily multidrug transport protein
STM1345	1423574	22	T	T	T	C	C	C	C	C	C	putative cytoplasmic protein
STM2642	2781807	232	A	A	A	A	A	A	A	G	G	putative transferase
STM0214	250062	83	T	T	T	T	C	C	C	C	C	uridylyltransferase
STM0214	249944	201	A	A	A	A	T	T	T	T	T	uridylyltransferase
STM0214	249923	222	A	A	A	G	G	G	G	G	G	uridylyltransferase
STM0214	249863	282	C	C	C	T	C	C	C	C	C	uridylyltransferase
STM0214	249842	303	T	T	T	C	C	C	C	C	C	uridylyltransferase
STM0214	249761	384	C	C	C	C	A	A	A	A	A	uridylyltransferase
STM0214	249745	400	T	T	T	C	C	C	C	C	C	uridylyltransferase
STM0214	249743	402	A	A	A	T	T	T	T	T	T	uridylyltransferase
STM0214	249659	486	A	A	A	G	G	G	G	G	G	uridylyltransferase
STM0214	249602	543	A	A	A	G	A	A	A	A	A	uridylyltransferase
STM0214	249158	987	T	T	T	C	T	T	T	T	T	uridylyltransferase
STM0214	249113	1032	A	A	A	G	G	G	G	G	G	uridylyltransferase
STM0214	249095	1050	A	A	A	A	G	G	G	G	G	uridylyltransferase
STM0214	249002	1143	G	G	G	C	C	C	C	C	C	uridylyltransferase
STM0214	248960	1185	C	C	C	T	C	C	C	C	C	uridylyltransferase
STM0214	248948	1197	G	G	G	A	G	G	G	G	G	uridylyltransferase
STM0214	248939	1206	T	T	T	C	C	C	C	C	C	uridylyltransferase
STM0214	248903	1242	G	G	G	A	G	G	G	G	G	uridylyltransferase
STM0214	248885	1260	G	G	G	A	G	G	G	G	G	uridylyltransferase
STM0214	248870	1275	T	T	T	T	G	G	G	G	G	uridylyltransferase
STM0214	248861	1284	G	G	G	G	A	A	A	A	A	uridylyltransferase
STM0214	248780	1365	A	A	A	G	G	G	G	G	G	uridylyltransferase
STM0214	248777	1368	T	T	T	C	C	C	C	C	C	uridylyltransferase
STM0214	248675	1470	G	G	G	G	A	A	A	A	A	uridylyltransferase
STM0214	248561	1584	G	G	G	C	G	G	G	G	G	uridylyltransferase
STM0214	248486	1659	C	C	C	G	G	G	G	G	G	uridylyltransferase
STM0214	248222	1923	C	C	C	C	T	T	T	T	T	uridylyltransferase
STM0214	248153	1992	T	T	T	C	T	T	T	T	T	uridylyltransferase
STM0214	248141	2004	T	T	T	C	T	T	T	T	T	uridylyltransferase
STM0214	248059	2086	A	A	A	C	A	A	A	A	A	uridylyltransferase
STM0214	248051	2094	C	C	C	G	C	C	C	C	C	uridylyltransferase
STM0214	248018	2127	C	C	C	T	C	C	C	C	C	uridylyltransferase
STM0214	247877	2268	C	C	C	T	C	C	C	C	C	uridylyltransferase
STM0214	247832	2313	A	A	A	C	C	C	C	C	C	uridylyltransferase
STM0214	247829	2316	C	C	C	T	T	T	T	T	T	uridylyltransferase
STM0214	247811	2334	G	G	G	A	A	A	A	A	A	uridylyltransferase
STM0214	247808	2337	G	G	G	A	G	G	G	G	G	uridylyltransferase
STM0214	247717	2428	T	T	T	C	T	T	T	T	T	uridylyltransferase
STM0214	247664	2481	G	G	G	A	G	G	G	G	G	uridylyltransferase
STM0498	557429	520	G	G	G	G	G	A	A	A	A	putative copper-transporting ATPase
STM0498	555559	2390	C	C	C	T	T	T	T	T	T	putative copper-transporting ATPase
STM2808	2954715	87	C	C	C	G	G	G	G	G	G	ribonucleoside-diphosphate reductase 2, beta subunit
STM0443	496750	443	C	C	C	C	C	T	T	T	T	cytochrome o ubiquinol oxidase subunit II
STM0040	47705	299	G	G	G	G	G	G	A	G	G	transcriptional activator of nhaA
STM0852	923455	78	C	C	C	C	A	C	C	C	C	putative Fe-S oxidoreductases family 1
STM0352	396958	101	A	A	A	G	A	A	A	A	A	putative cation efflux pump
STM0352	396945	114	C	C	C	C	A	A	A	A	A	putative cation efflux pump
STM0352	396888	171	T	T	T	C	T	T	T	T	T	putative cation efflux pump
STM0352	396495	564	C	C	C	C	C	C	C	C	T	putative cation efflux pump
STM0352	396453	606	T	T	T	T	C	C	C	C	C	putative cation efflux pump
STM0352	396416	643	C	C	C	C	T	T	T	T	T	putative cation efflux pump
STM0352	396321	738	G	G	G	A	A	A	A	A	A	putative cation efflux pump
STM0352	396289	770	C	C	C	C	A	A	A	A	A	putative cation efflux pump
STM0352	396231	828	C	C	C	C	C	C	T	C	C	putative cation efflux pump
STM0352	396210	849	A	A	A	G	G	G	G	G	G	putative cation efflux pump
STM0352	396117	942	A	A	A	G	G	G	G	G	G	putative cation efflux pump
STM0352	396033	1026	G	G	G	G	A	A	A	A	A	putative cation efflux pump
STM0352	396026	1033	T	T	T	T	C	C	C	C	C	putative cation efflux pump
STM0352	396005	1054	T	T	T	C	C	C	C	C	C	putative cation efflux pump
STM0352	395947	1112	T	C	T	T	T	T	T	T	T	putative cation efflux pump
STM0352	395889	1170	G	G	G	T	G	G	G	G	G	putative cation efflux pump
STM0352	395850	1209	C	C	C	T	C	C	C	C	C	putative cation efflux pump
STM0352	395848	1211	A	A	A	C	C	C	C	C	C	putative cation efflux pump
STM0884	955176	652	T	T	T	A	T	T	T	T	T	putative inner membrane protein; homology to SgaT from Vibrio
STM0884	955518	994	G	G	G	T	G	G	G	G	G	putative inner membrane protein; homology to SgaT from Vibrio
STM0884	955547	1023	T	T	T	T	T	T	C	T	T	putative inner membrane protein; homology to SgaT from Vibrio
STM0586	644017	23	T	T	T	C	C	C	C	C	C	enterochelin esterase
STM0586	644575	581	T	T	T	A	A	A	A	A	A	enterochelin esterase
STM0586	645202	1208	C	C	C	C	T	T	T	T	T	enterochelin esterase
STM0596	658225	794	C	C	C	T	T	T	T	T	T	2,3-dihydroxybenzoate-AMP ligase
STM0136	161371	2683	C	C	A	C	C	C	C	C	C	preprotein translocase; secretion protein of IISP family
STM2583	2726761	13	A	A	C	C	C	C	C	C	C	GTP-binding elongation factor
STM2583	2726759	15	A	A	T	T	T	T	T	T	T	GTP-binding elongation factor
STM2583	2726756	18	T	T	C	C	C	C	C	C	C	GTP-binding elongation factor
STM2583	2726753	21	C	C	T	T	T	T	T	T	T	GTP-binding elongation factor
STM2583	2726750	24	C	C	G	G	G	G	G	G	G	GTP-binding elongation factor
STM0627	690073	322	A	A	A	A	A	C	A	A	A	DcuC family, dicarboxylate transporter
STM4480	4723882	424	G	-	G	G	T	G	G	G	G	putative permease
STM3576	3742464	21	C	C	C	C	C	C	C	C	T	P-type ATPase family
STM3576	3743091	648	T	T	T	C	C	C	C	C	C	P-type ATPase family
STM3576	3743935	1492	G	G	G	A	A	A	A	A	A	P-type ATPase family
STM0969	1051622	658	A	G	G	G	G	G	G	G	G	putative APC family, amino-acid transporter
STM2875	3018440	603	C	C	C	A	C	C	C	C	C	regulatory helix-turn-helix proteins, araC family
STM1272	1351781	37	C	C	C	T	C	C	C	C	C	putative cytoplasmic protein
STM3712	3907923	626	A	A	A	G	G	G	G	G	G	heptosyl transferase I
STM3700	3894881	149	C	C	A	C	C	C	C	C	C	glycerol-3-phosphate dehydrogenase (NAD+)
STM3700	3894693	337	C	C	C	C	G	C	C	C	C	glycerol-3-phosphate dehydrogenase (NAD+)
STM3700	3894576	454	T	C	C	C	C	C	C	C	C	glycerol-3-phosphate dehydrogenase (NAD+)
STM1467	1540169	635	T	T	T	G	G	G	G	G	G	mannose-6-phosphate isomerase
STM3786	3985335	213	G	A	G	G	G	G	G	G	G	putative inner membrane protein
STM2179	2274973	424	C	C	C	T	C	C	C	C	C	putative sugar transporter
STM2179	2274544	853	C	C	C	T	C	C	C	C	C	putative sugar transporter
STM0801	869154	183	C	C	C	A	A	A	A	A	A	putative cytoplasmic protein
STM1528	1604705	445	G	G	G	G	G	T	T	T	T	putative outer membrane protein
STM1528	1604692	458	G	G	G	G	G	T	T	T	T	putative outer membrane protein
STM2474	2585094	1608	G	G	G	A	G	G	G	G	G	transketolase 2 isozyme
STM0706	771514	846	A	A	A	A	A	A	T	A	A	P-type ATPase, high-affinity potassium transport system, A chain
STM0213	249201	90	A	A	A	G	G	G	G	G	G	2,3,4,5-tetrahydropyridine-2-carboxylate N-succinyltransferase
STM0213	249195	96	C	C	C	A	A	A	A	A	A	2,3,4,5-tetrahydropyridine-2-carboxylate N-succinyltransferase
STM0213	248924	367	C	C	C	T	T	T	T	T	T	2,3,4,5-tetrahydropyridine-2-carboxylate N-succinyltransferase
STM0213	248844	447	C	C	C	C	T	T	T	T	T	2,3,4,5-tetrahydropyridine-2-carboxylate N-succinyltransferase
STM0213	248805	486	G	G	G	A	G	G	G	G	G	2,3,4,5-tetrahydropyridine-2-carboxylate N-succinyltransferase
STM0213	248780	511	C	C	C	T	C	C	C	C	C	2,3,4,5-tetrahydropyridine-2-carboxylate N-succinyltransferase
STM0213	248598	693	A	A	A	C	C	C	C	C	C	2,3,4,5-tetrahydropyridine-2-carboxylate N-succinyltransferase
STM0213	248562	729	C	C	C	C	T	T	T	T	T	2,3,4,5-tetrahydropyridine-2-carboxylate N-succinyltransferase
STM0213	248552	739	C	C	C	T	T	T	T	T	T	2,3,4,5-tetrahydropyridine-2-carboxylate N-succinyltransferase
STM2921	3063273	91	G	G	G	G	G	A	A	A	A	putative flavoprotein
STM2925	3066483	74	G	G	G	G	A	G	G	G	G	lipoprotein
STM1507	1585186	648	G	G	G	A	G	G	G	G	G	putative transport protein
STM0012	11790	212	G	G	G	G	G	A	A	A	A	chaperone Hsp70
STM2531	2664533	915	C	C	C	T	C	C	C	C	C	transglycosylase of penicillin-binding protein 1c
STM0651	713685	164	T	G	T	T	T	T	T	T	T	putative permease
STM0651	714354	833	G	G	G	A	G	G	G	G	G	putative permease
STM3714	3909049	525	G	G	G	T	G	G	G	G	G	putative hexose transferase
STM0504	563673	346	C	C	C	C	A	A	A	A	A	putative thioredoxin protein
STM3709	3902739	1191	T	T	T	C	C	C	C	C	C	2-amino-3-ketobutyrate CoA ligase
STM0746	814351	237	C	C	C	C	C	A	A	A	A	tol protein, role in outer membrane integrity
STM1641	1728305	3024	G	G	G	A	G	G	G	G	G	ATP-dependent helicase
STM0232	273376	439	A	A	A	G	G	G	G	G	G	acetylCoA carboxylase, carboxytransferase component, alpha subunit
STM0232	273538	601	C	C	C	C	T	T	T	T	T	acetylCoA carboxylase, carboxytransferase component, alpha subunit
STM0232	273541	604	T	T	T	T	A	A	A	A	A	acetylCoA carboxylase, carboxytransferase component, alpha subunit
STM0232	273583	646	C	C	C	T	C	C	C	C	C	acetylCoA carboxylase, carboxytransferase component, alpha subunit
STM0232	273625	688	G	G	G	T	G	G	G	G	G	acetylCoA carboxylase, carboxytransferase component, alpha subunit
STM0232	273685	748	C	C	C	T	T	T	T	T	T	acetylCoA carboxylase, carboxytransferase component, alpha subunit
STM0232	273793	856	A	A	A	G	A	A	A	A	A	acetylCoA carboxylase, carboxytransferase component, alpha subunit
STM0232	273895	958	G	G	G	A	G	G	G	G	G	acetylCoA carboxylase, carboxytransferase component, alpha subunit
STM0112	129996	1081	C	C	C	A	C	C	C	C	C	3-isopropylmalate dehydrogenase
STM4130	4348751	643	C	C	C	T	C	C	C	C	C	outer membrane receptor for transport of vitamin B12, E colicins, and bacteriophage BF23
STM4130	4349897	1789	A	A	A	T	A	A	A	A	A	outer membrane receptor for transport of vitamin B12, E colicins, and bacteriophage BF23
STM0088	100771	654	C	C	C	C	C	C	C	T	C	diadenosine tetraphosphatase
STM3863	4072190	567	T	T	T	C	C	C	C	C	C	putative permease
STM3863	4072137	620	G	G	G	G	G	G	G	T	G	putative permease
STM0011	10687	155	T	T	T	T	T	C	C	C	C	putative periplasmic protein
STM2034	2111337	127	C	C	C	C	C	C	T	C	C	synthesis of vitamin B12 adenosyl cobalamide precursor
STM3112	3270467	308	G	G	G	G	A	G	G	G	G	membrane-bound lytic murein transglycosylase C
STM4047	4257294	28	G	G	G	G	G	A	A	A	A	rhamnulokinase
STM4047	4257167	155	G	G	G	A	G	G	G	G	G	rhamnulokinase
STM4047	4256019	1303	G	G	G	A	G	G	G	G	G	rhamnulokinase
STM0625	688512	494	C	C	C	C	C	A	C	C	C	sensory histidine kinase in two-component regulatory system with DpiA
STM1796	1895191	218	C	C	C	C	C	C	A	C	C	trehalase, periplasmic
STM0002_thrA	815	491	A	A	A	A	A	C	A	A	A	aspartokinase I
STM4593	4847225	2306	A	A	A	A	G	A	A	A	A	putative fimbrial usher protein
STM4593	4847173	2358	T	T	T	C	C	C	C	C	C	putative fimbrial usher protein
STM3730	3924006	487	T	T	T	C	C	C	C	C	C	flavoprotein
STM2867	3011821	294	C	C	T	C	C	C	C	C	C	araC family bacterial regulatory helix-turn-helix protein
STM3199	3360481	69	G	G	G	G	A	G	G	G	G	putative membrane protein
STM3199	3360998	586	C	C	C	C	T	T	T	T	T	putative membrane protein
STM3199	3361144	732	G	G	G	G	C	C	C	C	C	putative membrane protein
STM4517	4771708	353	G	G	G	G	A	A	A	A	A	putative MFS family transport protein
STM4517	4770863	1198	G	G	A	G	G	G	G	G	G	putative MFS family transport protein
STM3899	4105495	1382	C	C	T	C	C	C	C	C	C	putative magnesium chelatase, subunit ChlI
STM3899	4105484	1393	G	G	G	A	G	G	G	G	G	putative magnesium chelatase, subunit ChlI
STM0455	511230	443	G	G	G	G	G	G	A	G	G	putative (aluminum) resistance protein
STM4515	4768437	862	G	G	G	G	G	A	G	G	G	putative sugar transporter
STM1365	1447585	1109	T	T	T	A	A	A	A	A	A	putative oxidase
STM1365	1448537	2061	A	A	A	C	C	C	C	C	C	putative oxidase
STM3658	3843651	282	A	A	A	G	G	G	G	G	G	putative inner membrane protein
STM1512	1590810	1143	C	C	C	T	C	C	C	C	C	dipeptidyl carboxypeptidase II
STM2982	3134013	266	C	C	C	C	T	C	C	C	C	regulator of gcv operon
STM2982	3133735	544	G	G	G	G	G	T	T	T	T	regulator of gcv operon
STM1566	1646394	591	C	C	T	C	C	C	C	C	C	NAD-linked malate dehydrogenase
STM3380	3551192	619	T	T	T	C	C	C	C	C	C	acetyl CoA carboxylase
STM3073	3234946	614	G	G	G	T	G	G	G	G	G	putative ABC-type cobalt transport system
STM0142	164190	938	G	G	A	G	G	G	G	G	G	putative component in type IV pilin biogenesis
STM3167	3328087	159	C	C	C	C	C	C	C	A	A	putative diadenosine tetraphosphate (Ap4A) hydrolase
STM4173	4389604	1168	G	G	G	G	G	G	A	G	G	sensory kinase in two component regulatory system with HydG
STM2555	2692350	1333	C	C	C	A	A	A	A	A	A	serine hydroxymethyltransferase
STM3365	3531398	583	T	T	T	T	T	T	C	T	T	putative membrane located multidrug resistance protein
STM1095	1180893	1376	G	G	G	G	G	A	G	G	G	Copper resistance; histidine kinase
STM0640	701684	343	A	A	A	G	G	G	G	G	G	cell elongation specific transpeptidase of penicillin-binding protein 2 (peptidoglycan synthetase)
STM0640	701247	780	G	G	G	A	A	A	A	A	A	cell elongation specific transpeptidase of penicillin-binding protein 2 (peptidoglycan synthetase)
STM0640	700575	1452	T	T	T	T	T	G	T	T	T	cell elongation specific transpeptidase of penicillin-binding protein 2 (peptidoglycan synthetase)
STM1557	1635562	836	T	C	C	C	C	C	C	C	C	putative aminotransferase
STM1064	1156315	1159	G	G	G	G	T	G	G	G	G	paraquat-inducible protein B
STM1064	1156359	1203	C	C	C	C	C	T	T	T	T	paraquat-inducible protein B
STM3373	3542062	345	T	T	T	T	T	T	T	T	G	rod shape-determining protein
STM1466	1537784	1409	G	G	G	G	G	G	A	G	G	putative periplasmic protein
STM1953	2041691	357	T	-	C	C	C	C	C	C	C	putative 1-cyclopropane-carboxylate deaminase
STM1953	2041550	498	G	-	G	G	T	G	G	G	G	putative 1-cyclopropane-carboxylate deaminase
STM0686	747779	368	A	A	T	T	T	T	T	T	T	glutamine tRNA synthetase
STM0022	25216	112	G	G	G	G	G	A	A	A	A	fimbrial chaparone
STM0022	25322	218	C	C	C	C	T	C	C	C	C	fimbrial chaparone
STM2389	2499736	516	G	G	G	A	G	G	G	G	G	putative acetyl-CoA acetyltransferase
STM2389	2499325	927	C	C	C	C	C	T	C	C	C	putative acetyl-CoA acetyltransferase
STM1992	2073057	1270	C	C	C	C	C	C	C	A	C	DNA cytosine methylase
STM4364	4608267	554	A	A	A	A	G	A	A	A	A	component of modulator for protease specific for FtsH phage lambda cII repressor
STM1501	1580498	556	G	G	G	A	G	G	G	G	G	putative inner membrane lipoprotein
STM0812	876398	718	G	G	G	G	G	G	A	G	G	cardiolipin (CL) synthase
STM0774	837956	421	G	G	G	A	A	A	A	A	A	galactokinase
STM0774	837458	919	C	C	C	C	C	C	C	C	T	galactokinase
STM3999	4206507	378	G	G	G	G	T	G	G	G	G	DNA polymerase I
STM2922	3063932	159	T	T	T	T	C	T	T	T	T	putative 3-polyprenyl-4-hydroxybenzoate decarboxylase
STM2922	3064453	680	A	A	A	A	A	G	A	A	A	putative 3-polyprenyl-4-hydroxybenzoate decarboxylase
STM1293	1370801	306	C	C	C	C	G	C	C	C	C	nicotinamidase/ pyrazinamidase
STM0863	935718	239	T	T	T	C	C	C	C	C	C	D-alanyl-D-alanine carboxypeptidase; penicillin-binding protein 6a
STM0863	936510	1031	C	C	C	C	C	A	A	A	A	D-alanyl-D-alanine carboxypeptidase; penicillin-binding protein 6a
STM0218	256963	699	A	A	A	G	G	G	G	G	G	uridylate kinase
STM3882	4092405	316	G	G	G	G	G	A	A	A	A	D-ribose high-affinity transport protein
STM3882	4093171	1082	A	A	A	A	G	A	A	A	A	D-ribose high-affinity transport protein
STM3882	4093397	1308	G	G	G	G	G	G	G	T	G	D-ribose high-affinity transport protein
STM3917	4126088	492	A	A	A	G	G	G	G	G	G	transcription termination factor Rho
STM0494	554359	736	T	A	T	T	T	-	T	T	T	UDP-sugar hydrolase 5'-nucleotidase
STM1589	1677076	15	C	C	C	C	C	T	T	T	T	putative NADP-dependent oxidoreductase
STM3867	4075271	1177	C	C	C	C	T	C	C	C	C	membrane-bound ATP synthase, F1 sector, alpha-subunit
STM3357	3524947	336	T	T	T	G	G	G	G	G	G	putative gntR family regulatory protein
STM3466	3615751	292	G	G	G	G	G	G	G	A	G	catabolite activator protein (CAP)
STM4456	4701583	1893	A	A	A	A	G	A	A	A	A	P-type ATPase
STM1315	1394210	253	G	G	G	A	A	A	A	A	A	transcriptional repressor of cel operon
STM4410	4647966	183	G	G	T	G	G	G	G	G	G	putative periplasmic protein
STM4410	4648104	321	G	G	G	G	A	G	G	G	G	putative periplasmic protein
STM4410	4648907	1124	G	G	G	G	T	G	G	G	G	putative periplasmic protein
STM4410	4651097	3314	T	T	T	C	C	C	C	C	C	putative periplasmic protein
STM3458	3609018	6	G	G	G	A	G	G	G	G	G	putative NAD(P)H oxidoreductase
STM1493	1569554	768	C	C	C	C	C	C	T	T	T	putative periplasmic component
STM1493	1569439	883	G	G	G	A	A	A	A	A	A	putative periplasmic component
STM1493	1569428	894	A	A	A	A	G	A	A	A	A	putative periplasmic component
STM0830	895650	618	G	G	G	A	G	G	G	G	G	glutamine high-affinity transporter
STM4283	4523778	763	G	G	G	A	G	G	G	G	G	DAACS family glutamate:aspartate symport protein
STM4099	4308928	217	C	C	C	C	C	T	T	T	T	transcriptional repressor of all met genes but metF
STM1000	1091413	70	A	A	A	A	A	C	A	A	A	asparagine tRNA synthetase
STM1000	1091123	360	C	C	C	C	C	T	T	T	T	asparagine tRNA synthetase
STM4377	4620007	489	G	G	A	G	G	G	G	G	G	putative acyl-CoA dehydrogenase
STM2279	2385138	212	T	T	T	C	C	C	C	C	C	putative ferredoxin
STM4589	4846193	1266	C	C	C	T	T	T	T	T	T	sensory kinase (alternative) in two-component regulatory system with CreB (or alternatively PhoB)
STM0397	450921	199	T	T	T	C	T	T	T	T	T	response regulator in two-component regulatory system with PhoR (or CreC)
STM0046	54640	803	A	-	A	G	G	G	G	G	G	isoleucine tRNA synthetase
STM1403	1487604	89	G	G	G	A	G	G	G	G	G	secretion system chaparone
STM0095	109049	283	G	G	G	G	A	G	G	G	G	23S rRNA pseudouridylate 746 synthase
STM4037	4243838	934	G	G	G	G	G	G	G	G	T	formate dehydrogenase [transl_except=(pos:586..588,aa:Sec)
STM4037	4242389	2383	T	T	T	C	C	C	C	C	C	formate dehydrogenase [transl_except=(pos:586..588,aa:Sec)
STM4037	4241772	3000	C	C	C	C	T	C	C	C	C	formate dehydrogenase [transl_except=(pos:586..588,aa:Sec)
STM0097	111843	1240	A	A	A	G	G	G	G	G	G	DNA polymerase II
STM2565	2707860	396	C	C	C	C	T	C	C	C	C	phosphoribosylformylglycinamidine synthetase
STM2565	2706642	1614	T	T	T	C	C	C	C	C	C	phosphoribosylformylglycinamidine synthetase
STM0318	363407	196	A	A	A	G	G	G	G	G	G	putative hydrolase of the alpha/beta superfamily
STM0318	363442	231	T	T	T	C	C	C	C	C	C	putative hydrolase of the alpha/beta superfamily
STM0318	363802	591	C	C	C	T	C	C	C	C	C	putative hydrolase of the alpha/beta superfamily
STM0318	363811	600	G	G	G	A	G	G	G	G	G	putative hydrolase of the alpha/beta superfamily
STM0318	363895	684	C	C	C	T	C	C	C	C	C	putative hydrolase of the alpha/beta superfamily
STM0318	364003	792	T	T	T	C	C	C	C	C	C	putative hydrolase of the alpha/beta superfamily
STM0318	364057	846	T	T	T	T	C	C	C	C	C	putative hydrolase of the alpha/beta superfamily
STM0318	364099	888	G	G	G	A	A	A	A	A	A	putative hydrolase of the alpha/beta superfamily
STM0318	364327	1116	T	T	T	C	T	T	T	T	T	putative hydrolase of the alpha/beta superfamily
STM0318	364425	1214	G	G	G	A	G	G	G	G	G	putative hydrolase of the alpha/beta superfamily
STM3105	3263437	912	A	A	A	G	A	A	A	A	A	putative periplasmic protein
STM4182	4400799	134	C	C	C	C	C	C	A	C	C	homoserine transsuccinylase
STM1519	1596952	136	A	A	A	G	G	G	G	G	G	AraC/XylS family transcriptional activator of defense systems
STM3055	3215379	216	T	T	T	C	T	T	T	T	T	glycine cleavage complex protein T
STM1324	1403550	178	T	T	T	T	C	C	C	C	C	putative cytoplasmic protein
STM0508	567497	384	A	A	A	A	T	A	A	A	A	putative inner membrane protein
STM0508	569482	2369	C	C	C	C	T	T	T	T	T	putative inner membrane protein
STM2539	2677305	893	T	T	T	A	A	A	A	A	A	chaperone protein
STM2539	2676818	1380	G	G	G	G	G	A	G	G	G	chaperone protein
STM4412	4651622	357	G	G	G	G	G	A	A	A	A	putative pemease
STM4412	4651398	581	C	C	C	A	C	C	C	C	C	putative pemease
STM2914	3056762	288	T	T	T	T	A	T	T	T	T	putative nucleoside-diphosphate-sugar epimerase
STM1814	1912416	345	G	G	G	G	A	G	G	G	G	cell division inhibitor
STM0881	952796	212	C	C	C	T	C	C	C	C	C	putative inner membrane protein
STM0881	953055	471	G	G	G	A	G	G	G	G	G	putative inner membrane protein
STM2644	2784170	89	T	T	T	C	C	C	C	C	C	putative LysR family transcriptional regulator
STM1627	1717250	418	T	T	T	C	T	T	T	T	T	alcohol dehydrogenase class III
STM3590	3759933	212	T	T	T	T	C	T	T	T	T	universal stress protein B
STM1597	1686604	225	G	A	G	G	G	G	G	G	G	putative aldehyde dehydrogenase
STM1597	1686091	738	C	C	C	C	C	C	C	T	C	putative aldehyde dehydrogenase
STM1784	1882474	678	G	G	G	G	G	A	A	A	A	putative GTP-binding protein
STM1238	1325472	1254	C	C	C	C	T	T	T	T	T	isocitrate dehydrogenase in e14 prophage
STM1238	1325511	1293	T	T	T	T	G	G	G	G	G	isocitrate dehydrogenase in e14 prophage
STM1238	1325568	1350	A	A	A	A	C	C	C	C	C	isocitrate dehydrogenase in e14 prophage
STM1238	1325590	1372	A	A	A	A	T	T	T	T	T	isocitrate dehydrogenase in e14 prophage
STM1238	1325591	1373	G	G	G	G	C	C	C	C	C	isocitrate dehydrogenase in e14 prophage
STM1238	1325592	1374	T	T	T	T	A	A	A	A	A	isocitrate dehydrogenase in e14 prophage
STM1238	1325601	1383	C	C	C	C	T	T	T	T	T	isocitrate dehydrogenase in e14 prophage
STM1238	1325610	1392	T	T	T	T	C	C	C	C	C	isocitrate dehydrogenase in e14 prophage
STM1238	1325615	1397	C	C	C	C	A	A	A	A	A	isocitrate dehydrogenase in e14 prophage
STM1238	1325616	1398	G	G	G	G	A	A	A	A	A	isocitrate dehydrogenase in e14 prophage
STM1238	1325619	1401	T	T	T	T	C	C	C	C	C	isocitrate dehydrogenase in e14 prophage
STM0361	410232	74	A	A	A	G	A	A	A	A	A	cytochrome BD2 subunit II
STM0361	410241	83	G	G	G	T	G	G	G	G	G	cytochrome BD2 subunit II
STM0361	410670	512	T	T	T	C	T	T	T	T	T	cytochrome BD2 subunit II
STM0361	410679	521	C	C	C	T	C	C	C	C	C	cytochrome BD2 subunit II
STM0361	410776	618	T	T	T	C	T	T	T	T	T	cytochrome BD2 subunit II
STM0361	410831	673	G	G	G	A	G	G	G	G	G	cytochrome BD2 subunit II
STM0361	410943	785	C	C	C	T	C	C	C	C	C	cytochrome BD2 subunit II
STM0361	410967	809	G	G	G	A	G	G	G	G	G	cytochrome BD2 subunit II
STM0361	411063	905	T	T	T	C	T	T	T	T	T	cytochrome BD2 subunit II
STM0361	411072	914	C	C	C	T	C	C	C	C	C	cytochrome BD2 subunit II
STM0361	411108	950	C	C	C	T	C	C	C	C	C	cytochrome BD2 subunit II
STM2223	2324870	324	A	A	A	G	G	G	G	G	G	putative ATP-dependent helicase
STM2522	2654390	482	G	G	G	A	A	A	A	A	A	histidine tRNA synthetase
STM0434	486387	395	A	A	A	C	C	C	C	C	C	ketopantoate reductase
STM2651	2789991	122	G	G	G	G	A	G	G	G	G	putative acetyl-CoA synthetase
STM2651	2790127	258	A	A	A	A	G	A	A	A	A	putative acetyl-CoA synthetase
STM2651	2790143	274	C	C	C	C	C	C	C	G	G	putative acetyl-CoA synthetase
STM2651	2791305	1436	A	A	A	G	G	G	G	G	G	putative acetyl-CoA synthetase
STM2651	2791550	1681	C	C	C	C	A	C	C	C	C	putative acetyl-CoA synthetase
STM2526	2660022	49	A	A	A	G	G	G	G	G	G	nucleoside diphosphate kinase
STM2468	2576921	435	G	G	G	G	G	G	A	G	G	putative ethanolamine utilization protein
STM0311	356072	10	T	T	T	T	C	C	C	C	C	putative glutamine amidotransferase
STM0311	356081	19	A	A	A	G	A	A	A	A	A	putative glutamine amidotransferase
STM0311	356481	419	A	A	A	C	C	C	C	C	C	putative glutamine amidotransferase
STM0311	356642	580	A	A	A	G	G	G	G	G	G	putative glutamine amidotransferase
STM0311	356714	652	C	C	C	T	C	C	C	C	C	putative glutamine amidotransferase
STM3843	4049110	885	G	G	G	G	G	G	G	A	A	GTPase for tRNA modification and thiophene and furan oxidation
STM1226	1311553	468	G	G	G	A	G	G	G	G	G	spermidine/putrescine transporter
STM0126	148603	1218	G	G	G	G	G	A	A	A	A	UDP-N-acetylmuramoylalanine-D-glutamate ligase
STM0126	148671	1286	G	A	G	G	G	G	G	G	G	UDP-N-acetylmuramoylalanine-D-glutamate ligase
STM3793	3992803	801	C	C	C	C	C	C	G	C	C	putative sugar kinase
STM3897	4105225	334	C	C	C	C	T	C	C	C	C	putative LysR family transcriptional regulator
STM0388	441067	381	C	C	C	C	A	C	C	C	C	shikimate kinase II
STM0388	441146	460	T	T	T	C	T	T	T	T	T	shikimate kinase II
STM0819	884609	77	G	G	G	A	G	G	G	G	G	putative transcriptional repressor (TetR/AcrR family)
STM0819	884323	363	C	C	C	C	C	C	C	C	T	putative transcriptional repressor (TetR/AcrR family)
STM3274	3441128	860	A	A	A	G	G	G	G	G	G	putative protease
STM3244	3410432	962	C	C	C	T	C	C	C	C	C	threonine dehydratase
STM0684	743642	493	C	C	C	C	C	T	T	T	T	glucosamine-6-phosphate deaminase
STM4474	4716016	329	C	C	C	C	A	C	C	C	C	putative inner membrane protein
STM4357	4600024	123	A	A	A	A	A	G	G	G	G	putative nucleotide-binding protein
STM0309	352262	337	T	T	T	A	T	T	T	T	T	putative acyl-CoA dehydrogenase
STM0309	352235	364	G	G	G	G	A	A	A	A	A	putative acyl-CoA dehydrogenase
STM0309	352193	406	C	C	C	T	T	T	T	T	T	putative acyl-CoA dehydrogenase
STM0309	352157	442	C	C	C	T	C	C	C	C	C	putative acyl-CoA dehydrogenase
STM0309	352130	469	A	A	A	G	G	G	G	G	G	putative acyl-CoA dehydrogenase
STM0309	352109	490	T	T	T	C	T	T	T	T	T	putative acyl-CoA dehydrogenase
STM0309	352064	535	T	T	T	T	C	C	C	C	C	putative acyl-CoA dehydrogenase
STM0309	352058	541	G	G	G	G	A	A	A	A	A	putative acyl-CoA dehydrogenase
STM0309	351998	601	A	A	A	G	G	G	G	G	G	putative acyl-CoA dehydrogenase
STM0309	351947	652	G	G	G	A	G	G	G	G	G	putative acyl-CoA dehydrogenase
STM0309	351713	886	C	C	C	T	C	C	C	C	C	putative acyl-CoA dehydrogenase
STM0309	351644	955	C	C	C	C	T	T	T	T	T	putative acyl-CoA dehydrogenase
STM0309	351635	964	T	T	T	C	C	C	C	C	C	putative acyl-CoA dehydrogenase
STM0309	351602	997	T	T	T	C	T	T	T	T	T	putative acyl-CoA dehydrogenase
STM0309	351569	1030	T	T	T	T	C	C	C	C	C	putative acyl-CoA dehydrogenase
STM0309	351500	1099	A	A	A	A	G	G	G	G	G	putative acyl-CoA dehydrogenase
STM0309	351368	1231	A	A	A	A	T	T	T	T	T	putative acyl-CoA dehydrogenase
STM0309	351341	1258	G	G	G	G	A	A	A	A	A	putative acyl-CoA dehydrogenase
STM0309	351275	1324	T	T	T	T	C	C	C	C	C	putative acyl-CoA dehydrogenase
STM0309	351260	1339	T	T	T	T	C	C	C	C	C	putative acyl-CoA dehydrogenase
STM0309	351154	1445	C	C	C	T	C	C	C	C	C	putative acyl-CoA dehydrogenase
STM0309	351101	1498	C	C	C	C	T	T	T	T	T	putative acyl-CoA dehydrogenase
STM0309	350972	1627	G	G	G	G	A	A	A	A	A	putative acyl-CoA dehydrogenase
STM0309	350954	1645	C	C	C	C	T	T	T	T	T	putative acyl-CoA dehydrogenase
STM0309	350951	1648	C	C	C	C	T	T	T	T	T	putative acyl-CoA dehydrogenase
STM0309	350822	1777	G	G	G	G	A	A	A	A	A	putative acyl-CoA dehydrogenase
STM0309	350813	1786	T	T	T	T	C	C	C	C	C	putative acyl-CoA dehydrogenase
STM0309	350489	2110	A	A	A	A	G	G	G	G	G	putative acyl-CoA dehydrogenase
STM0309	350435	2164	C	C	C	C	T	T	T	T	T	putative acyl-CoA dehydrogenase
STM0309	350284	2315	C	C	C	C	T	T	T	T	T	putative acyl-CoA dehydrogenase
STM0309	350282	2317	T	T	T	T	G	G	G	G	G	putative acyl-CoA dehydrogenase
STM0309	350279	2320	A	A	A	A	T	T	T	T	T	putative acyl-CoA dehydrogenase
STM0309	350258	2341	C	C	C	C	T	T	T	T	T	putative acyl-CoA dehydrogenase
STM1657	1750809	463	T	T	T	C	C	C	C	C	C	putative methyl-accepting chemotaxis protein
STM1878	1971164	108	C	C	C	C	C	C	C	T	C	DNA exonuclease X
STM2504	2620888	7	G	-	G	T	G	G	G	G	G	putative cytoplasmic protein
STM3647	3834301	423	G	G	G	G	A	G	G	G	G	putative outer membrane lipoprotein
STM4304	4548888	1022	G	G	G	G	T	T	T	T	T	sensory histidine kinase in two-component retgulatory system with DcuR
STM0117	137750	201	A	A	A	A	G	A	A	A	A	acetolactate synthase III, small subunit
STM0117	137855	306	G	G	A	G	G	G	G	G	G	acetolactate synthase III, small subunit
STM2887	3030712	829	G	G	G	G	G	A	A	A	A	surface presentation of antigens
STM1425	1500860	1094	T	T	T	T	G	T	T	T	T	putative MATE family transport protein
STM0120	140496	109	T	C	C	C	C	C	C	C	C	putative S-adenosyl methionine adenyltransferase
STM0353	398599	46	G	G	G	G	A	A	A	A	A	putative cation transport ATPase
STM0353	398725	172	G	G	G	G	A	A	A	A	A	putative cation transport ATPase
STM0353	398780	227	G	G	G	G	A	A	A	A	A	putative cation transport ATPase
STM0353	398802	249	A	A	A	G	A	A	A	A	A	putative cation transport ATPase
STM0353	399010	457	T	T	T	C	C	C	C	C	C	putative cation transport ATPase
STM0353	399121	568	G	G	G	A	G	G	G	G	G	putative cation transport ATPase
STM0353	399343	790	C	C	C	C	A	A	A	A	A	putative cation transport ATPase
STM0353	399376	823	C	C	C	A	A	A	A	A	A	putative cation transport ATPase
STM0353	399451	898	A	A	A	T	A	A	A	A	A	putative cation transport ATPase
STM0353	399488	935	G	G	G	A	G	G	G	G	G	putative cation transport ATPase
STM0353	399490	937	A	A	A	C	C	C	T	T	T	putative cation transport ATPase
STM0353	399512	959	C	C	C	C	G	G	G	G	G	putative cation transport ATPase
STM0353	399532	979	C	C	C	C	T	T	T	T	T	putative cation transport ATPase
STM0353	399604	1051	C	C	C	C	T	T	T	T	T	putative cation transport ATPase
STM0353	399643	1090	G	G	G	A	G	G	G	G	G	putative cation transport ATPase
STM0353	399781	1228	T	T	T	C	T	T	T	T	T	putative cation transport ATPase
STM0353	399823	1270	G	G	G	T	G	G	G	G	G	putative cation transport ATPase
STM0353	399926	1373	G	G	G	A	G	G	G	G	G	putative cation transport ATPase
STM0353	399946	1393	G	G	G	A	A	A	A	A	A	putative cation transport ATPase
STM0353	399988	1435	T	T	T	C	T	T	T	T	T	putative cation transport ATPase
STM0353	400041	1488	T	T	T	T	T	G	G	G	G	putative cation transport ATPase
STM0353	400059	1506	A	A	A	G	G	G	G	G	G	putative cation transport ATPase
STM0353	400129	1576	T	T	T	C	C	C	C	C	C	putative cation transport ATPase
STM0353	400143	1590	G	G	G	A	G	G	G	G	G	putative cation transport ATPase
STM0353	400151	1598	G	G	G	A	G	G	G	G	G	putative cation transport ATPase
STM0353	400195	1642	G	G	G	A	A	A	A	A	A	putative cation transport ATPase
STM0353	400291	1738	A	A	A	G	A	A	A	A	A	putative cation transport ATPase
STM0353	400309	1756	G	G	G	A	G	G	G	G	G	putative cation transport ATPase
STM0353	400315	1762	C	C	C	G	C	C	C	C	C	putative cation transport ATPase
STM0353	400381	1828	G	G	G	A	G	G	G	G	G	putative cation transport ATPase
STM0353	400393	1840	G	G	G	A	G	G	G	G	G	putative cation transport ATPase
STM0353	400396	1843	T	T	T	C	C	C	C	C	C	putative cation transport ATPase
STM0353	400411	1858	G	G	G	G	A	A	A	A	A	putative cation transport ATPase
STM0353	400434	1881	G	G	G	G	A	A	A	A	A	putative cation transport ATPase
STM0353	400582	2029	C	C	C	T	C	C	C	C	C	putative cation transport ATPase
STM0353	400783	2230	T	T	T	C	C	C	C	C	C	putative cation transport ATPase
STM0353	400820	2267	G	G	G	A	G	G	G	G	G	putative cation transport ATPase
STM3847	4055143	1063	A	A	A	G	G	G	G	G	G	putative MFS family tranport protein
STM1880	1973756	311	C	C	C	T	C	C	C	C	C	putative inner membrane protein
STM3467	3618146	1813	C	C	T	C	C	C	C	C	C	putative inner membrane protein
STM3089	3251334	11	C	C	T	C	C	C	C	C	C	putative inner membrane protein
STM1810	1909846	80	G	G	G	G	G	G	T	G	G	putative cytoplasmic protein
STM3537	3703980	155	A	A	A	G	G	G	G	G	G	glycosyl hydrolase
STM2639	2778315	435	G	G	G	G	A	G	G	G	G	anti sigma E (sigma 24) factor, negative regulator
STM3975	4182072	747	C	C	C	T	C	C	C	C	C	component of sec-independent protein export
STM2930	3070354	399	C	C	C	T	C	C	C	C	C	4-phosphocytidyl-2C-methyl-D-erythritol synthase
STM4122	4340807	279	C	C	C	C	T	C	C	C	C	acetylglutamate kinase
STM0827	892129	276	G	G	G	G	G	G	C	G	G	putative transport protein
STM0827	890791	1614	G	G	G	G	A	G	G	G	G	putative transport protein
STM0849	920057	62	T	T	T	C	C	C	C	C	C	putative ABC transporter periplasmic binding protein
STM1221	1307386	631	G	G	G	G	G	G	G	G	A	putative nicotinate-nucleotide dimethylbenzimidazolephosphoribosltransferase
STM2260	2358731	170	A	A	A	A	A	C	A	A	A	periplasmic nitrate reductase
STM2284	2390524	462	C	C	C	G	C	C	C	C	C	sn-glycerol-3-phosphate dehydrogenase (anaerobic), large subunit
STM2284	2391366	1304	C	C	C	T	C	C	C	C	C	sn-glycerol-3-phosphate dehydrogenase (anaerobic), large subunit
STM0750	818592	774	G	G	T	G	G	G	G	G	G	putative periplasmic protein
STM3136	3298869	1452	C	C	C	C	C	T	T	T	T	putative D-mannonate oxidoreductase
STM3499	3652946	1540	C	C	C	C	T	C	C	C	C	putative inner membrane protein
STM0244	284787	215	G	G	G	A	A	A	A	A	A	regulator in colanic acid synthesis
STM0244	284674	328	T	T	T	A	T	T	T	T	T	regulator in colanic acid synthesis
STM0244	284673	329	G	G	G	G	A	A	A	A	A	regulator in colanic acid synthesis
STM0244	284646	356	A	A	A	G	G	G	G	G	G	regulator in colanic acid synthesis
STM3157	3319306	734	C	C	C	C	C	T	T	T	T	putative oxidoreductase
STM3512	3671096	872	G	G	G	G	G	G	G	T	G	high-affinity gluconate permease in GNT I system
STM2996	3150764	1955	A	A	A	G	A	A	A	A	A	exonuclease V, subunit
STM4150	4363599	65	T	T	T	C	C	C	C	C	C	50S ribosomal subunit protein L1

## Sheet: ST2460_snps_annotated
locus	chrpos	genepos	N16_2207	N14_1267	N16_0656	N17_1212	N17_1364	N17_1393	N17_2111	N15_1496	Protein_Product
STM1953	2041691	357	T	-	C	C	C	C	C	C	putative 1-cyclopropane-carboxylate deaminase
STM2069	2146999	470	C	C	T	T	T	T	T	C	putative LysR family transcriptional regulator
STM4337	4580371	302	C	A	C	C	C	C	C	C	putative luxR family bacterial regulatory protein
STM2981	3133475	390	A	A	G	G	G	G	G	G	putative small membrane protein
STM3773	3969995	2567	A	G	G	G	G	G	G	G	putative NtrC family transcriptional regulator
STM4024	4235386	560	A	A	T	A	A	A	A	A	putative sugar kinase
STM3377	3548400	309	A	A	A	A	A	A	A	G	putative nitrate reductase
STM0229	268413	646	C	C	T	C	C	C	C	C	tetraacyldisaccharide-1-P
STM0686	747779	368	A	A	A	A	A	A	A	T	glutamine tRNA synthetase
STM0980	1064846	44	G	G	G	G	G	G	G	A	cytidine monophosphate (CMP) kinase
STM3613	3788199	377	C	C	T	T	T	T	T	C	putative Zn-dependent peptidase
STM2867	3011821	294	C	C	C	C	C	C	C	T	araC family bacterial regulatory helix-turn-helix protein
STM3879	4087553	211	A	A	A	A	A	A	A	G	putative regulator protein
STM0456	512349	84	C	C	T	T	T	T	T	C	putative ABC transporter periplasmic binding protein
STM0456	511211	1222	G	G	G	A	A	A	A	G	putative ABC transporter periplasmic binding protein
STM2142	2237112	856	G	A	G	G	G	G	G	G	putative MFS family transport protein
STM1988	2071431	187	T	C	T	T	T	T	T	T	putative cytoplasmic protein
STM0683	742296	625	G	G	A	A	A	A	A	G	N-acetylglucosamine-6-phosphate deacetylase
STM0952	1029523	181	A	G	A	A	A	A	A	A	putative transcriptional regulator, lysR family
STM0352	395947	1112	T	C	T	T	T	T	T	T	putative cation efflux pump
STM1490	1566383	709	G	G	G	G	G	G	G	A	putative chloride channel protein
STM1490	1566126	966	C	C	A	A	A	A	A	C	putative chloride channel protein
STM1824	1921655	505	T	C	T	T	T	T	T	T	p-aminobenzoate synthetase, component I
STM0651	713685	164	T	G	T	T	T	T	T	T	putative permease
STM1695	1787417	266	G	G	G	G	G	G	G	T	ABC superfamily peptide transport protein
STM3090	3252760	1077	A	A	A	G	G	G	G	A	methionine adenosyltransferase 1
STM2645	2785374	128	A	A	A	C	C	C	C	A	putative transport protein
STM0533	595486	570	T	T	T	T	T	T	T	C	phosphoribosylaminoimidazole carboxylase = AIR carboxylase, CO(2)-fixing subunit
STM3179	3343390	485	A	A	A	A	A	A	A	G	NADPH specific quinone oxidoreductase
STM0407	463834	1515	G	G	G	A	A	A	A	G	preprotein translocase, IISP family, part of the channel
STM3434	3592285	165	C	C	C	T	T	T	T	C	30S ribosomal subunit protein S3
STM0631	693951	310	C	T	C	C	C	C	C	C	putative hydrolase
STM3841	4046241	69	T	T	T	T	T	T	T	C	putative inner membrane protein
STM1415	1496019	346	C	C	C	C	C	C	C	G	secretion system apparatus protein
STM1885	1977097	522	T	G	G	G	G	G	G	G	6-phosphogluconate dehydratase
STM2122	2207285	272	G	G	G	A	A	A	A	G	uridine/cytidine kinase
STM2570	2714979	230	T	T	T	T	T	T	T	G	putative phosphotransferase system IIB components
STM1566	1646394	591	C	C	C	C	C	C	C	T	NAD-linked malate dehydrogenase
STM4373	4616663	41	G	G	G	G	G	G	G	A	putative cytoplasmic protein
STM1731	1827289	371	G	G	G	G	G	G	G	A	putative catalase
STM4168	4385731	511	C	T	C	C	C	C	C	C	endonuclease V
STM1557	1635562	836	T	C	C	C	C	C	C	C	putative aminotransferase
STM3378	3549490	397	A	A	A	A	A	A	A	G	putative inner membrane protein
STM2065	2137487	1186	T	C	C	C	C	C	C	C	hydrogen sulfide production membrane anchoring protein
STM0974	1057410	32	G	G	G	G	G	G	G	T	formate transporter
STM1378	1459653	265	C	C	C	C	C	C	C	A	pyruvate kinase I
STM1182	1264702	274	G	A	G	G	G	G	G	G	flagellar biosynthesis protein
STM0886	957581	1356	T	T	T	T	T	T	T	C	putative sulfatase
STM2285	2392756	917	A	C	C	C	C	C	C	C	sn-glycerol-3-phosphate dehydrogenase (anaerobic), membrane anchor subunit
STM2118	2201500	10	T	T	T	T	T	T	T	C	putative polysaccharide export protein
STM1234	1320680	900	A	A	A	A	A	A	A	G	tRNA (5-methylaminomethyl-2-thiouridylate)-methyltransferase
STM3836	4041196	116	C	C	T	T	T	T	T	C	gap repair protein
STM3899	4105495	1382	C	C	C	C	C	C	C	T	putative magnesium chelatase, subunit ChlI
STM4154	4370586	575	A	C	C	C	C	C	C	C	RNA polymerase, beta prime subunit
STM3183	3345669	802	C	C	C	C	C	C	C	T	cyclic 3',5'-adenosine monophosphate phosphodiesterase
STM0850	921880	286	G	G	A	A	A	A	A	G	putative ABC transporter periplasmic binding protein
STM1109	1196390	75	C	G	G	G	G	G	G	G	putative periplasmic protein
STM3704	3898086	523	A	G	G	G	G	G	G	G	phosphoglyceromutase
STM3928	4137964	847	G	A	G	G	G	G	G	G	TDP-Fuc4NAc:lipidII transferase
STM0484	541942	1033	C	C	C	T	T	T	T	C	DNA polymerase III, tau and gamma subunits
STM0484	542775	1866	C	C	C	C	C	C	C	T	DNA polymerase III, tau and gamma subunits
STM1494	1571165	88	G	G	G	G	G	G	G	A	ABC-type transport system protein
STM1285	1360917	903	G	G	G	G	G	G	G	A	putative Ser protein kinase
STM0692	754705	652	C	C	T	T	T	T	T	C	putative LysR family transcriptional regulator
STM1156	1244314	585	A	G	A	A	A	A	A	A	putative enzyme related to sulfur transferases
STM0791	857771	1121	C	C	C	C	C	C	C	T	histidine ammonia lyase
STM1160	1246369	42	T	T	C	C	C	C	C	T	putative sarcosine oxidase
STM1160	1246368	43	T	T	G	G	G	G	G	T	putative sarcosine oxidase
STM1597	1686604	225	G	A	G	G	G	G	G	G	putative aldehyde dehydrogenase
STM0086	99916	1152	G	G	G	A	A	A	A	G	CPA2 family K+ efflux antiporter, glutathione-regulated
STM3967	4173223	584	A	T	A	A	A	A	A	A	putative dienelactone hydrolase family
STM4410	4647966	183	G	G	G	G	G	G	G	T	putative periplasmic protein
STM4108	4321664	1053	G	A	G	G	G	G	G	G	glycerol dehydrogenase, NAD
STM1615	1705316	806	T	G	G	G	G	G	G	G	putative nucleoside triphosphatase
STM3369	3535590	358	T	C	C	C	C	C	C	C	putative protease
STM2654	2793449	930	G	G	A	A	A	A	A	G	MFS family alpha-ketoglutarate permease
STM0494	554359	736	T	A	T	T	T	T	T	T	UDP-sugar hydrolase 5'-nucleotidase
STM3415	3582334	975	A	T	A	A	A	A	A	A	RNA polymerase, alpha subunit
STM1846	1942951	249	C	G	C	C	C	C	C	C	activator of proP
STM4090	4297565	603	A	G	G	G	G	G	G	G	1,4-dihydroxy-2-naphthoate octaprenyltransferase
STM2388	2497574	531	C	C	A	A	A	A	A	C	putative dehydrogenase
STM2329	2439785	108	A	A	G	G	G	G	G	A	putative cytoplasmic protein
STM0478	535862	1334	A	A	A	T	T	T	T	A	putative small-conductance mechanosensitive channel
STM4298	4543271	990	T	T	T	T	T	T	T	A	alpha-galactosidase
STM1725	1822824	1182	G	A	G	G	G	G	G	G	N-(5-phosphoribosyl)anthranilate isomerase
STM3150	3312333	319	C	C	T	T	T	T	T	C	putative Ni/Fe hydrogenases, small subunit
STM2198	2296490	1313	A	A	A	A	A	A	A	G	putative regulatory protein
STM0591	651570	10	A	G	G	G	G	G	G	G	ferric enterobactin transporter
STM0436	487613	744	T	T	C	C	C	C	C	T	IS903 transposase
STM4087	4294956	929	A	A	A	A	A	A	A	G	glycerol diffusion MIP channel
STM4413	4652135	1049	C	C	C	C	C	C	C	A	putative imidazolonepropionase and related amidohydrolases
STM4472	4714173	237	T	T	T	T	T	T	T	C	putative inner membrane protein
STM1139	1227480	535	C	C	C	C	C	C	C	A	putative transcriptional regulator in curly assembly/transport, 2nd curli operon
STM1767	1866337	286	A	T	T	T	T	T	T	T	response regulator in two-component regulatory system with NarX (or NarQ)
STM1122	1207002	520	C	C	C	C	C	C	C	T	putative transcriptional repressor (TetR/AcrR family)
STM3467	3618146	1813	C	C	C	C	C	C	C	T	putative inner membrane protein
STM2803	2949274	462	G	A	G	G	G	G	G	G	putative gntR family regulatory protein
STM1913	2006576	1634	C	C	C	C	C	C	C	T	flagellar biosynthesis protein
STM3700	3894881	149	C	C	C	C	C	C	C	A	glycerol-3-phosphate dehydrogenase (NAD+)
STM3700	3894576	454	T	C	C	C	C	C	C	C	glycerol-3-phosphate dehydrogenase (NAD+)
STM2276	2380337	119	T	T	A	A	A	A	A	T	3-demethylubiquinone-9 3-methyltransferase
STM1143	1231294	295	C	C	T	C	C	C	C	C	minor curlin subunit precursor
STM3935	4141131	805	G	G	G	G	G	G	G	A	protein for a late step of protoheme IX synthesis
STM1949	2039480	128	A	A	A	A	A	A	A	G	putative cytoplasmic protein
STM0546	607645	1607	C	C	C	C	C	C	C	T	outer membrane usher protein
STM4517	4770863	1198	G	G	G	G	G	G	G	A	putative MFS family transport protein
STM2360	2470771	494	C	C	T	T	T	T	T	C	putative diaminopimelate decarboxylase
STM2360	2470352	913	A	G	A	A	A	A	A	A	putative diaminopimelate decarboxylase
STM3922	4132207	532	T	T	T	T	T	T	T	C	dTDP-glucose 4,6-dehydratase
STM3736	3927914	533	C	C	A	C	C	C	C	C	putative LysR family transcriptional regulator
STM3370	3538818	1037	C	C	T	C	C	C	C	C	RNase G
STM1480	1557653	438	G	G	A	A	A	A	A	G	pyridine nucleotide transhydrogenase, beta subunit
STM1598	1688279	110	G	A	G	G	G	G	G	G	putative gntR family regulatory protein
STM1598	1687778	611	T	C	C	C	C	C	C	C	putative gntR family regulatory protein
STM2542	2680927	197	C	C	T	T	T	T	T	C	NifU homolog
STM4556	4810944	213	G	A	G	G	G	G	G	G	16S ribosomal rRNA
STM0735	800880	387	G	G	G	G	G	G	G	T	succinate dehydrogenase, Fe-S protein
STM0978	1063435	799	T	C	C	C	C	C	C	C	3-enolpyruvylshikimate-5-phosphate synthetase
STM3114	3271663	1118	A	A	A	A	A	A	A	C	ornithine decarboxylase isozyme
STM3178	3342689	1240	A	T	A	A	A	A	A	A	putative sensory histidine kinase in regulatory system
STM4091	4298057	1107	A	A	G	G	G	G	G	A	ATPase component of the HslUV protease
STM3010	3166882	997	C	C	T	T	T	T	T	C	2-acylglycerophospho-ethanolamine acyl transferase
STM4185	4405681	602	G	G	T	T	T	T	T	G	isocitrate dehydrogenase kinase/phosphatase
STM0107	123368	734	T	T	T	T	T	T	T	G	putative binding-protein-dependent transport system inner membrane component
STM0120	140496	109	T	C	C	C	C	C	C	C	putative S-adenosyl methionine adenyltransferase
STM2263	2360569	193	G	A	G	G	G	G	G	G	putative ABC-type multidrug/protein/lipid transport system
STM2263	2360530	232	C	C	T	C	C	C	C	C	putative ABC-type multidrug/protein/lipid transport system
STM2994	3144558	1557	G	G	A	A	A	A	A	G	exonuclease V, beta chain
STM0827	890999	1406	C	C	A	A	A	A	A	C	putative transport protein
STM1308	1388823	292	T	T	T	T	T	T	T	C	periplasmic protein related to spheroblast formation
STM2572	2718395	819	A	A	A	A	A	A	A	G	putative ABC superfamily transport protein
STM1185	1266194	2151	A	G	G	G	G	G	G	G	RNase E
STM1225	1310302	872	G	G	G	G	G	G	G	A	spermidine/putrescine transporter
STM3723	3917635	237	C	T	C	C	C	C	C	C	lipopolysaccharide core biosynthesis protein
STM0476	532412	11	T	T	C	T	T	T	T	T	acridine efflux pump
STM3135	3296853	772	A	C	C	C	C	C	C	C	putative mannonate hydrolase
STM1061	1151269	1398	T	T	T	T	T	T	T	C	putative N6-adenine-specific DNA methylase
STM3610	3783778	649	T	T	T	T	T	T	T	G	putative inner membrane protein
STM0190	221460	550	C	C	C	C	C	C	C	T	transpeptidase of penicillin-binding protein 1b
STM2583	2726761	13	A	A	A	A	A	A	A	C	GTP-binding elongation factor
STM2583	2726759	15	A	A	A	A	A	A	A	T	GTP-binding elongation factor
STM2583	2726756	18	T	T	T	T	T	T	T	C	GTP-binding elongation factor
STM2583	2726753	21	C	C	C	C	C	C	C	T	GTP-binding elongation factor
STM2583	2726750	24	C	C	C	C	C	C	C	G	GTP-binding elongation factor
STM3186	3349998	1425	A	A	A	A	A	A	A	G	outer membrane channel
STM0263	302800	73	T	C	C	C	C	C	C	C	RNase HI
STM2275	2379623	282	G	-	G	G	G	G	G	A	putative gntR family regulatory protein
STM3628	3812226	121	C	C	C	C	C	C	C	T	dipeptide transport protein 2
STM2563	2705149	261	C	C	C	C	C	C	C	A	putative transcriptional regulator of two-component regulator protein (EBP familiiy)
STM1849	1946267	413	T	C	C	C	C	C	C	C	putative inner membrane protein
STM1385	1469818	607	A	C	A	A	-	A	A	A	tetrathionate reductase complex, subunit B
STM0006	4586	1381	G	G	G	G	G	G	G	A	putative alanine/glycine transport protein
STM1734	1829323	42	G	G	G	A	A	A	A	G	putative inner membrane protein
STM1157	1244599	251	G	G	A	A	A	A	A	G	putative secreted protein
STM1768	1866690	27	T	T	T	T	T	T	T	C	putative invasin
STM0136	161371	2683	C	C	C	C	C	C	C	A	preprotein translocase; secretion protein of IISP family
STM1887	1981624	144	G	G	G	G	G	G	G	A	putative transcriptional regulator
STM3587	3755485	224	T	T	T	T	T	T	T	G	putative membrane protein
STM1780	1878112	426	G	G	G	A	A	A	A	G	phosphoribosylpyrophosphate synthetase
STM1370	1453202	531	C	C	C	C	C	C	C	T	putative ABC transporter
STM0585	641547	15	G	G	G	G	G	G	G	A	outer membrane porin, receptor for ferric enterobactin (enterochelin) and colicins B and D
STM3878	4085833	486	G	G	G	G	G	G	G	A	putative inner membrane protein
STM3878	4085511	808	A	A	A	A	A	A	A	G	putative inner membrane protein
STM1560	1640238	473	G	G	G	G	G	G	G	A	putative alpha amylase
STM2640	2778953	479	C	C	C	A	A	A	A	C	sigma E (sigma 24) factor of RNA polymerase
STM0969	1051622	658	A	G	G	G	G	G	G	G	putative APC family, amino-acid transporter
STM1641	1730186	1143	G	G	A	A	A	A	A	G	ATP-dependent helicase
STM3705	3899999	888	T	T	T	T	T	T	T	C	putative membrane protein
STM1890	1984693	385	C	C	C	C	C	C	C	T	putative peptidase
STM1890	1984092	986	G	G	T	G	G	G	G	G	putative peptidase
STM0617	679387	606	C	C	C	C	C	C	C	T	RNase I
STM3407	3577645	194	G	G	G	G	G	G	G	A	10-formyltetrahydrofolate:L-methionyl-tRNA(fMet) N-formyltransferase
STM0142	164190	938	G	G	G	G	G	G	G	A	putative component in type IV pilin biogenesis
STM1574	1655996	808	C	C	C	C	C	C	C	A	methyl viologen resistance protein
STM1148	1233644	165	T	C	C	C	C	C	C	C	putative phospholipase
STM4377	4620007	489	G	G	G	G	G	G	G	A	putative acyl-CoA dehydrogenase
STM0233	274314	138	C	C	C	C	C	C	C	A	putative endochitinase
STM2127	2216008	502	T	T	T	T	T	T	T	G	putative outer membrane receptor
STM3496	3652758	379	T	C	C	C	C	C	C	C	putative hydrolase
STM1717	1814587	236	C	C	C	C	C	C	C	A	putative oxoacyl-(acyl carrier protein) reductase
STM1125	1212614	711	C	C	C	C	C	C	C	T	SSS family major sodium/proline symporter
STM3786	3985335	213	G	A	G	G	G	G	G	G	putative inner membrane protein
STM4547	4806627	501	C	C	C	C	C	C	C	A	putative LuxR/UhpA family transcriptional regulator
STM4293	4533940	461	G	G	G	G	G	G	G	A	putative integral membrane protein
STM1450	1525164	364	G	A	A	A	A	A	A	A	pyridoxal kinase 2
STM3201	3362572	1476	T	C	C	C	C	C	C	C	adenylyl transferase for glutamine synthetase
STM1365	1447812	1336	C	C	T	T	T	T	T	C	putative oxidase
STM1265	1347548	37	G	G	G	G	G	G	G	A	putative response regulators
STM0509	570281	564	A	A	G	G	G	G	G	A	putative outer membrane protein
STM0509	570287	570	A	A	A	A	A	A	A	G	putative outer membrane protein
STM4511	4764318	767	T	C	T	T	T	T	T	T	putative LysR family transcriptional regulator
STM2206	2305841	383	C	C	C	C	C	C	C	T	phosphoenolpyruvate-dependent sugar phosphotransferase system, EIIA 2
STM2206	2305779	445	A	C	C	C	C	C	C	C	phosphoenolpyruvate-dependent sugar phosphotransferase system, EIIA 2
STM1094	1180418	209	C	A	C	C	C	C	C	C	Pathogenicity island encoded protein: SPI5
STM1274	1353125	6	G	G	G	G	G	G	G	A	putative inner membrane protein
STM0117	137855	306	G	G	G	G	G	G	G	A	acetolactate synthase III, small subunit
STM3089	3251334	11	C	C	C	C	C	C	C	T	putative inner membrane protein
STM0750	818592	774	G	G	G	G	G	G	G	T	putative periplasmic protein
STM2449	2559467	228	C	C	C	C	C	C	C	T	putative acetyltransferase
STM3837_dnaN	4041962	571	C	C	T	T	T	T	T	C	DNA polymerase III, beta-subunit
STM1124	1204658	2928	C	C	T	T	T	T	T	C	plasma membrane proline dehydrogenase
STM1460	1534778	220	A	A	G	-	A	A	A	A	putative inner membrane protein
STM0126	148671	1286	G	A	G	G	G	G	G	G	UDP-N-acetylmuramoylalanine-D-glutamate ligase
STM1392	1475017	1811	A	A	A	A	-	A	A	G	secretion system regulator: Sensor component
STM1392	1474277	2551	G	A	G	G	-	G	G	G	secretion system regulator: Sensor component
STM4086	4293966	390	A	G	G	G	G	G	G	G	glycerol kinase
STM3620	3803019	457	A	G	G	G	G	G	G	G	putative ATPase involved in chromosome partitioning
STM1383	1465372	975	G	A	G	G	-	G	G	G	tetrathionate reductase complex, subunit A
STM2320	2429699	99	A	G	G	G	G	G	G	G	NADH dehydrogenase I chain J
STM1360	1440257	1088	A	A	A	A	A	A	A	T	putative MFS family transport protein
STM2105	2187896	603	T	T	C	C	C	C	C	C	mannose-1-phosphate

## Sheet: ST150_snps_annotated
locus	chrpos	genepos	sal678	sal679	sal680	M18_12182	N16_1558	Protein_Product
STM4467	4708243	1101	C	C	C	C	T	putative arginine deiminase
STM0795	861790	592	T	T	C	C	T	7-keto-8-aminopelargonic acid synthetase
STM1574	1655340	1464	T	T	C	T	T	methyl viologen resistance protein
STM2389	2499488	764	C	C	C	T	C	putative acetyl-CoA acetyltransferase
STM0074	86466	221	G	G	A	G	G	putative BCCT family betaine/carnitine/choline transport protein
STM1391	1476072	87	T	C	C	C	C	secretion system regulator: transcriptional activator
STM4242	4463810	1237	C	C	C	T	C	putative outer membrane or exported protein
STM1725	1822022	380	C	C	C	T	C	N-(5-phosphoribosyl)anthranilate isomerase
STM3534	3697524	1401	A	A	A	C	A	glycogen phosphorylase
STM1179	1261809	22	C	C	T	C	C	flagellar biosynthesis protein
STM1253	1337177	262	C	C	C	A	C	putative inner membrane protein
STM2372	2484067	526	T	T	C	C	T	putative transport protein
STM1918	2012973	761	T	C	C	C	C	glutamate methyltransferase
STM2357	2466510	668	A	A	T	A	A	putative amino acid transporter
STM1135	1225139	96	C	C	T	C	C	putative oxidoreductase
STM2565	2706640	1616	T	C	C	C	C	phosphoribosylformylglycinamidine synthetase
STM3208	3372001	821	G	T	T	T	T	putative O-sialoglycoprotein endopeptidase
STM3208	3371983	839	C	T	T	T	T	putative O-sialoglycoprotein endopeptidase
STM3208	3371975	847	G	A	A	A	A	putative O-sialoglycoprotein endopeptidase
STM3208	3371951	871	A	C	C	C	C	putative O-sialoglycoprotein endopeptidase
STM3208	3371941	881	G	A	A	A	A	putative O-sialoglycoprotein endopeptidase
STM3208	3371938	884	G	T	T	T	T	putative O-sialoglycoprotein endopeptidase
STM3208	3371936	886	G	T	T	T	T	putative O-sialoglycoprotein endopeptidase
STM3208	3371920	902	G	A	A	A	A	putative O-sialoglycoprotein endopeptidase
STM3208	3371918	904	G	T	T	T	T	putative O-sialoglycoprotein endopeptidase
STM3208	3371899	923	G	C	C	C	C	putative O-sialoglycoprotein endopeptidase
STM3208	3371897	925	G	A	A	A	A	putative O-sialoglycoprotein endopeptidase
STM3208	3371888	934	C	T	T	T	T	putative O-sialoglycoprotein endopeptidase
STM3208	3371880	942	G	A	A	A	A	putative O-sialoglycoprotein endopeptidase
STM3208	3371875	947	G	T	T	T	T	putative O-sialoglycoprotein endopeptidase
STM3208	3371873	949	G	C	C	C	C	putative O-sialoglycoprotein endopeptidase
STM3208	3371866	956	G	A	A	A	A	putative O-sialoglycoprotein endopeptidase
STM3208	3371863	959	G	C	C	C	C	putative O-sialoglycoprotein endopeptidase
STM3208	3371859	963	G	C	C	C	C	putative O-sialoglycoprotein endopeptidase
STM1337	1416359	701	T	C	C	C	C	phenylalanine tRNA synthetase, alpha-subunit
STM2125	2212665	191	G	G	A	G	G	putative heat shock protein (Hsp70/DnaK)
STM1992	2073833	494	C	C	C	T	C	DNA cytosine methylase
STM2429	2543048	762	G	G	A	G	G	required for sulfate transport
STM1905	1999194	135	C	C	C	T	C	putative SAM-dependent methyltransferase
STM2519	2650162	1296	A	A	A	A	G	putative GTP-binding protein
STM4304	4549256	654	C	C	A	A	C	sensory histidine kinase in two-component retgulatory system with DcuR
STM0052	60964	143	C	C	T	C	C	putative transcription regulator sensor for citrate
STM2995	3149627	26	C	T	C	C	C	protease III
STM2995	3149173	480	A	A	A	C	A	protease III
STM2172	2268373	455	T	T	C	C	T	putative outer membrane efflux protein
STM0649	711984	38	A	C	C	C	C	putative hydrolase N-terminus
STM0649	712000	54	A	G	G	G	G	putative hydrolase N-terminus
STM0649	712021	75	C	T	T	T	T	putative hydrolase N-terminus
STM0649	712023	77	C	A	A	A	A	putative hydrolase N-terminus
STM3240	3404407	599	G	G	G	T	G	L-serine deaminase
STM1454	1529051	133	A	A	A	G	A	putative membrane NADH-quinone reductase protein
STM1724	1820411	320	A	A	G	A	A	anthranilate synthase, component II
STM1731	1826971	53	C	C	T	C	C	putative catalase
STM2522	2653716	1156	C	C	C	T	C	histidine tRNA synthetase
STM0205	240122	489	G	A	A	A	A	putative inner membrane protein
STM0205	240116	495	T	C	C	C	C	putative inner membrane protein
STM0205	240110	501	C	A	A	A	A	putative inner membrane protein
STM0205	240107	504	C	G	G	G	G	putative inner membrane protein
STM0205	240104	507	G	T	T	T	T	putative inner membrane protein
STM0205	240100	511	T	A	A	A	A	putative inner membrane protein
STM0205	240091	520	T	C	C	C	C	putative inner membrane protein
STM0205	240079	532	G	A	A	A	A	putative inner membrane protein
STM0205	240060	551	G	T	T	T	T	putative inner membrane protein
STM0205	240055	556	G	T	T	T	T	putative inner membrane protein
STM0205	240052	559	G	T	T	T	T	putative inner membrane protein
STM0205	240038	573	T	C	C	C	C	putative inner membrane protein
STM0205	240031	580	G	C	C	C	C	putative inner membrane protein
STM0205	240022	589	C	G	G	G	G	putative inner membrane protein
STM0205	240012	599	T	G	G	G	G	putative inner membrane protein
STM0205	240011	600	T	A	A	A	A	putative inner membrane protein
STM0205	240006	605	T	G	G	G	G	putative inner membrane protein
STM0205	240002	609	G	A	A	A	A	putative inner membrane protein
STM0205	239999	612	G	T	T	T	T	putative inner membrane protein
STM0205	239996	615	T	G	G	G	G	putative inner membrane protein
STM0205	239995	616	T	C	C	C	C	putative inner membrane protein
STM0205	239989	622	G	A	A	A	A	putative inner membrane protein
STM1947	2038129	116	C	C	T	C	C	putative LuxR/UhpA family response regulator
STM2013	2093676	699	G	G	G	G	A	putative MATE family transport protein
STM3042	3201083	873	T	T	C	C	T	ssDNA exonuclease
STM0559	617223	141	G	G	A	G	G	putative glycosyl translocase
STM2442	2553123	594	C	C	T	C	C	thiosulfate permease W protein
STM0086	99611	847	T	T	G	T	T	CPA2 family K+ efflux antiporter, glutathione-regulated
STM1512	1591322	1655	C	C	C	C	T	dipeptidyl carboxypeptidase II
STM1543	1617908	406	G	G	A	G	G	putative transport protein
STM3811	4010473	513	C	C	T	C	C	putative cytoplasmic protein
STM2185	2280958	38	A	G	G	G	G	putative inner membrane protein
STM0233	275089	913	T	T	C	C	T	putative endochitinase
STM0537	600317	1192	C	T	C	C	C	cysteine tRNA synthetase
STM3274	3440584	316	A	G	A	A	A	putative protease
STM1304	1384334	943	C	T	T	T	T	arginine succinyltransferase
STM3970	4177821	529	A	A	G	A	A	S-adenosylmethionine
STM1845	1940388	744	C	C	C	T	C	carboxy-terminal protease for penicillin-binding protein 3
STM0647	708301	223	T	T	C	T	T	a minor lipoprotein
STM1515	1593606	295	C	C	C	T	C	putative periplasmic protein
STM4597	4854803	5	G	G	G	A	G	putative periplasmic protein
STM3547	3717350	975	A	A	A	T	A	putative transcriptional regulator of sugar metabolism
STM0841	907995	942	G	G	G	A	G	putative cytoplasmic protein
STM1766	1865240	1081	C	C	C	T	C	sensory histidine kinase in two component regulatory system with NarL
STM3369	3534464	1484	A	A	A	G	A	putative protease
STM1507	1585384	846	T	T	C	C	T	putative transport protein
STM2340	2452256	893	G	G	G	A	G	putative transketolase
STM2668	2808668	714	T	T	C	C	T	putative cytoplasmic protein
STM0045	53269	398	C	T	C	C	C	flavokinase and FAD synthetase
STM0991	1078095	788	C	T	C	C	C	S-adenosylmethionine-dependent methyltransferase
STM3888	4098425	536	C	A	C	C	C	putative gntR family regulatory protein
STM1370	1453878	1207	C	C	T	C	C	putative ABC transporter
STM0815	879028	589	G	G	G	A	G	putative ABC superfamily (membrane) transport protein
STM1844	1939243	814	T	C	C	C	C	heat shock protein
STM3328	3488394	2106	C	C	C	T	C	sensory histidine kinase in two-component regulatory system with ArcA
STM4343	4582531	1468	A	A	G	G	A	fumarate reductase
STM0011	10734	108	C	C	T	C	C	putative periplasmic protein
STM4364	4608528	815	G	A	G	G	G	component of modulator for protease specific for FtsH phage lambda cII repressor
STM1318	1397059	47	T	T	C	C	T	catalase
STM4137	4357446	775	C	T	C	C	C	UDP-N-acetylenolpyruvoylglucosamine reductase
STM0737	805389	837	C	C	C	C	T	2-oxoglutarate dehydrogenase (dihydrolipoyltranssuccinase E2 component)
STM0053	61764	31	G	G	A	G	G	putative transcription regulator
STM4296	4537242	1472	C	C	T	T	C	arginine decarboxylase
STM0793	857840	958	G	T	T	T	T	7,8-diaminopelargonic acid synthetase
STM3348	3515407	4	G	G	A	G	G	serine endoprotease
STM2398	2510269	232	A	A	A	T	A	protein for signal transmission
STM3375	3544337	538	G	G	G	A	G	putative diguanylate cyclase
STM4047	4256541	781	C	C	T	C	C	rhamnulokinase
STM0416	470186	354	T	T	C	C	T	pyrimidine deaminase
STM3349	3517387	504	C	C	T	C	C	periplasmic serine endoprotease
STM1586	1672176	404	C	C	T	C	C	putative periplasmic protein
STM1338	1417643	988	A	A	G	G	A	phenylalanine tRNA synthetase, beta-subunit
STM3849	4057102	752	T	T	C	C	T	putative cytoplasmic protein
STM0150	172535	846	C	A	-	A	A	APC family aromatic amino acid transporter
STM1345	1424063	511	G	G	T	G	G	putative cytoplasmic protein
STM3390	3561115	16	C	C	A	C	C	transmembrane protein affecting septum formation and cell membrane permeability
STM3368	3533500	858	C	C	C	T	C	suppresses inhibitory activity of CsrA
STM2281	2387015	486	C	T	C	C	C	putative LysR family transcriptional regulator
STM1060	1147903	762	G	A	G	G	G	putative iron-sulfur protein
STM1252	1336904	599	G	G	T	T	G	putative cytoplasmic protein
STM2530	2660751	2163	T	T	C	C	T	putative anaerobic dimethylsulfoxide reductase
STM2859	3004022	327	G	G	A	G	G	formate hydrogen-lyase transcriptional activator for fdhF, hyc and hyp operons
STM0436	487793	564	A	A	G	G	A	IS903 transposase
STM3863	4072146	611	C	C	C	T	C	putative permease
STM2403	2517048	916	C	C	C	T	C	glucokinase
STM2101	2181567	1090	G	G	T	G	G	putative galactokinase
STM3950	4154738	49	C	C	T	C	C	putative hydrolase of the HAD superfamily
STM0144	167416	299	G	G	G	A	G	prelipin peptidase dependent protein
STM0471	526700	118	A	T	T	T	T	putative inner membrane protein
STM3335	3504028	421	T	T	G	T	T	putative cytoplasmic protein
STM4371	4615184	307	C	C	C	T	C	putative phage shock protein A
STM2936	3076540	995	A	C	C	C	C	aminopeptidase in alkaline phosphatase isozyme conversion
STM1627	1717476	192	T	T	A	T	T	alcohol dehydrogenase class III
STM3126	3284535	885	G	G	C	C	G	putative amino acid transporter
STM3233	3399450	958	T	T	G	G	T	putative glutathione S-transferase
STM2428	2540676	412	C	T	C	C	C	cell division protein involved in FtsZ ring
STM2376	2487612	339	G	G	G	A	G	putative periplasmic protein
STM1935	2029618	244	T	C	C	C	C	cytoplasmic ferritin
STM2142	2236477	221	T	C	T	T	T	putative MFS family transport protein
STM0260	299044	881	A	G	G	G	G	transcriptional regulator for nitrite reductase (cytochrome c552)
STM1522	1598376	520	G	G	A	G	G	MFS family L-arabinose/isopropyl-beta-D-thiogalactopyranoside export protein
STM1432	1510105	8	G	G	G	A	G	putative cell wall-associated hydrolase
STM1458	1533730	32	T	C	T	T	T	putative alternative beta subunit of Na+-transporting NADH:ubiquinone oxidoreductase
STM1925	2021420	295	A	T	A	A	A	regulator of flagellar biosynthesis
STM1290	1367815	870	C	C	T	C	C	glyceraldehyde-3-phosphate dehydrogenase A
STM4153	4366073	163	A	A	A	C	A	RNA polymerase, beta subunit
STM2791	2940232	107	A	A	A	A	C	NADP-dependent succinate-semialdehyde dehydrogenase I
STM4259	4481119	1247	T	T	T	C	T	putative ABC exporter outer membrane component-like protein
STM3938	4145055	8	A	G	A	A	A	porphobilinogen deaminase
STM3714	3909534	40	A	A	A	G	A	putative hexose transferase
STM2917	3058355	1101	C	T	T	T	T	putative tRNA synthase
STM2917	3058348	1108	G	T	T	T	T	putative tRNA synthase
STM2917	3058345	1111	G	T	T	T	T	putative tRNA synthase
STM2917	3058343	1113	G	A	A	A	A	putative tRNA synthase
STM2917	3058336	1120	A	G	G	G	G	putative tRNA synthase
STM2917	3058333	1123	C	T	T	T	T	putative tRNA synthase
STM2917	3058329	1127	G	T	T	T	T	putative tRNA synthase
STM2917	3058320	1136	G	T	T	T	T	putative tRNA synthase
STM2917	3058316	1140	T	C	C	C	C	putative tRNA synthase
STM2917	3058304	1152	G	T	T	T	T	putative tRNA synthase
STM2917	3058301	1155	C	A	A	A	A	putative tRNA synthase
STM2917	3058297	1159	T	C	C	C	C	putative tRNA synthase
STM2917	3058296	1160	T	A	A	A	A	putative tRNA synthase
STM2917	3058292	1164	C	G	G	G	G	putative tRNA synthase
STM2917	3058288	1168	G	T	T	T	T	putative tRNA synthase
STM2917	3058286	1170	G	C	C	C	C	putative tRNA synthase
STM2917	3058283	1173	G	T	T	T	T	putative tRNA synthase
STM2917	3058279	1177	G	T	T	T	T	putative tRNA synthase
STM2917	3058278	1178	G	C	C	C	C	putative tRNA synthase
STM2917	3058270	1186	C	T	T	T	T	putative tRNA synthase
STM2917	3058267	1189	C	A	A	A	A	putative tRNA synthase
STM2917	3058260	1196	C	A	A	A	A	putative tRNA synthase
STM2917	3058258	1198	G	T	T	T	T	putative tRNA synthase
STM2917	3058254	1202	C	G	G	G	G	putative tRNA synthase
STM2917	3058252	1204	C	T	T	T	T	putative tRNA synthase
STM2917	3058246	1210	C	T	T	T	T	putative tRNA synthase
STM2917	3058241	1215	A	T	T	T	T	putative tRNA synthase
STM2917	3058236	1220	G	C	C	C	C	putative tRNA synthase
STM2917	3058227	1229	G	C	C	C	C	putative tRNA synthase
STM2917	3058222	1234	G	A	A	A	A	putative tRNA synthase
STM2917	3058220	1236	A	T	T	T	T	putative tRNA synthase
STM2917	3058212	1244	T	C	C	C	C	putative tRNA synthase
STM2917	3058211	1245	T	A	A	A	A	putative tRNA synthase
STM2917	3058209	1247	T	C	C	C	C	putative tRNA synthase
STM2917	3058207	1249	C	G	G	G	G	putative tRNA synthase
STM2917	3058195	1261	G	A	A	A	A	putative tRNA synthase
STM2271	2370568	179	G	A	A	A	A	sensory histidine kinase in two-component regulatory system with RcsB
STM0623	686038	239	G	G	T	G	G	citrate lyase acyl carrier protein (gamma chain)
STM1764	1855518	2890	T	T	A	T	T	nitrate reductase 1, alpha subunit
STM2458	2566574	677	G	G	G	T	G	ethanolamine ammonia-lyase, heavy chain
STM0568	624214	25	C	T	T	T	T	APC family, phenylalanene transporter
STM0568	624217	28	C	A	A	A	A	APC family, phenylalanene transporter
STM0568	624222	33	C	A	A	A	A	APC family, phenylalanene transporter
STM0568	624223	34	C	T	T	T	T	APC family, phenylalanene transporter
STM0568	624225	36	G	C	C	C	C	APC family, phenylalanene transporter
STM0568	624232	43	G	A	A	A	A	APC family, phenylalanene transporter
STM0568	624234	45	G	C	C	C	C	APC family, phenylalanene transporter
STM0568	624239	50	G	C	C	C	C	APC family, phenylalanene transporter
STM0568	624243	54	G	T	T	T	T	APC family, phenylalanene transporter
STM0568	624251	62	A	C	C	C	C	APC family, phenylalanene transporter
STM0568	624252	63	A	G	G	G	G	APC family, phenylalanene transporter
STM0568	624255	66	A	T	T	T	T	APC family, phenylalanene transporter
STM0568	624261	72	C	A	A	A	A	APC family, phenylalanene transporter
STM0568	624265	76	C	A	A	A	A	APC family, phenylalanene transporter
STM0568	624268	79	T	C	C	C	C	APC family, phenylalanene transporter
STM0568	624270	81	G	T	T	T	T	APC family, phenylalanene transporter
STM0568	624273	84	G	A	A	A	A	APC family, phenylalanene transporter
STM0568	624274	85	G	C	C	C	C	APC family, phenylalanene transporter
STM0568	624283	94	A	C	C	C	C	APC family, phenylalanene transporter
STM2351	2461825	306	G	T	T	T	T	histidine and lysine/arginine/ornithine transport protein
STM2478	2589137	1283	T	T	C	T	T	putative beta-lactamase class C
STM2387	2497208	203	G	G	G	A	G	phosphohistidine phosphatase
STM3998	4204535	314	T	T	C	T	T	putative endonuclease
STM2197	2294740	482	G	G	A	G	G	putative phosphoserine phosphatase
STM2489	2603615	428	C	C	C	T	C	dihydrodipicolinate synthase
STM1193	1278026	725	G	T	T	T	T	3-oxoacyl-[acyl-carrier-protein synthase III; acetylCoA ACP transacylase
STM1193	1278044	743	C	T	T	T	T	3-oxoacyl-[acyl-carrier-protein synthase III; acetylCoA ACP transacylase
STM1193	1278107	806	C	T	T	T	T	3-oxoacyl-[acyl-carrier-protein synthase III; acetylCoA ACP transacylase
STM1193	1278120	819	G	T	T	T	T	3-oxoacyl-[acyl-carrier-protein synthase III; acetylCoA ACP transacylase
STM1193	1278135	834	C	T	T	T	T	3-oxoacyl-[acyl-carrier-protein synthase III; acetylCoA ACP transacylase
STM1193	1278139	838	T	G	G	G	G	3-oxoacyl-[acyl-carrier-protein synthase III; acetylCoA ACP transacylase
STM1193	1278155	854	G	A	A	A	A	3-oxoacyl-[acyl-carrier-protein synthase III; acetylCoA ACP transacylase
STM1193	1278161	860	G	C	C	C	C	3-oxoacyl-[acyl-carrier-protein synthase III; acetylCoA ACP transacylase
STM1193	1278164	863	G	T	T	T	T	3-oxoacyl-[acyl-carrier-protein synthase III; acetylCoA ACP transacylase
STM1193	1278170	869	G	A	A	A	A	3-oxoacyl-[acyl-carrier-protein synthase III; acetylCoA ACP transacylase
STM1193	1278175	874	G	C	C	C	C	3-oxoacyl-[acyl-carrier-protein synthase III; acetylCoA ACP transacylase
STM1193	1278177	876	G	A	A	A	A	3-oxoacyl-[acyl-carrier-protein synthase III; acetylCoA ACP transacylase
STM1193	1278186	885	G	C	C	C	C	3-oxoacyl-[acyl-carrier-protein synthase III; acetylCoA ACP transacylase
STM1193	1278189	888	G	T	T	T	T	3-oxoacyl-[acyl-carrier-protein synthase III; acetylCoA ACP transacylase
STM1193	1278193	892	G	C	C	C	C	3-oxoacyl-[acyl-carrier-protein synthase III; acetylCoA ACP transacylase
STM1193	1278197	896	G	T	T	T	T	3-oxoacyl-[acyl-carrier-protein synthase III; acetylCoA ACP transacylase
STM1193	1278199	898	G	T	T	T	T	3-oxoacyl-[acyl-carrier-protein synthase III; acetylCoA ACP transacylase
STM1058	1147655	781	A	A	G	G	A	dihydro-orotate oxidase
STM4034	4242289	10	A	G	G	G	G	putative formate dehydrogenase formation protein
STM4034	4242265	34	C	T	T	T	T	putative formate dehydrogenase formation protein
STM4034	4242250	49	G	T	T	T	T	putative formate dehydrogenase formation protein
STM4034	4242237	62	A	G	G	G	G	putative formate dehydrogenase formation protein
STM4034	4242216	83	C	T	T	T	T	putative formate dehydrogenase formation protein
STM4034	4242202	97	C	T	T	T	T	putative formate dehydrogenase formation protein
STM3138	3299688	939	A	A	A	G	A	putative methyl-accepting chemotaxis protein
STM1299	1378181	447	G	G	G	G	A	NADP-specific glutamate dehydrogenase
STM1317	1396317	25	A	A	G	G	A	putative glucosidase
STM0491	549200	201	A	A	G	G	A	inosine-guanosine kinase
STM3178	3342759	1310	G	G	A	G	G	putative sensory histidine kinase in regulatory system
STM3166	3327146	741	T	T	C	C	T	putative cation transporter
STM3587	3755484	225	G	G	G	A	G	putative membrane protein
