# Supplementary material for: Phylogenomic Analysis of Salmonella enterica subsp. enterica Serovar Bovismorbificans from Clinical and Food Samples Using Whole Genome Wide Core Genes and kmer Binning Methods to Identify Two Distinct Polyphyletic Genome Pathotypes
Source: Microorganisms. 2022 Jun 11;10(6):1199. doi: 10.3390/microorganisms10061199 (PMC9228720; doi:10.3390/microorganisms10061199)
Supplement: Supplementary file 1 [file microorganisms-10-01199-s001.zip › Supplemental_File_S4.xlsx]

## Sheet: Title Page
Supplemental_File_S2
Jaccard matrix generated using k-mer comparisons of 330 genomes from the serovars S. Bovismorbificans Hindmarsh,
Muenchen and Takoradi (total =330 X 330 comparative matrix). Heatmap red to green = most divergent to most similar

## Sheet: Serovar clusters
strain	accession						Muenchen	cluster 1	ARYW01	2009K-0951
PNUSAS013102	SRR5584552	Bovismorbificans	cluster 2				Muenchen	cluster 1	SRR2015637	CFSAN024517
Sal676	AZKV01	Bovismorbificans	cluster 2				Muenchen	cluster 1	SRR1105695	FDN0019
PNUSAS028213	SRR6345507	Bovismorbificans	cluster 2				Muenchen	cluster 1	SRR1021937	FL_UFL-SR19
FDA00003265	SRR1646561	Bovismorbificans	cluster 2				Muenchen	cluster 1	SRR5487931	HIY0063
FDA00003264	SRR1646518	Bovismorbificans	cluster 2				Muenchen	cluster 1	SRR6807857	MOD1-Arm-032-2
	SRR4273698	Bovismorbificans	cluster 2				Muenchen	cluster 1	SRR6807956	MOD1-Ppo-306
FSIS1504461	SRR2981147	Bovismorbificans	cluster 2				Muenchen	cluster 3	SRR7516256	373201
FDA00003266	SRR1646562	Bovismorbificans	cluster 2				Muenchen	cluster 3	SRR7458532	416318
FSIS1607385	SRR4044967	Bovismorbificans	cluster 2				Muenchen	cluster 3	SRR4237679	CFSAN023873
Sal680	AZKU01	Bovismorbificans	cluster 2				Muenchen	cluster 3	SRR6071671	FDA00002285
PNUSAS003337	SRR4039933	Bovismorbificans	cluster 2				Bovismorbificans	cluster 1	MYGL01	06-0615
FSIS11706627	SRR6440236	Bovismorbificans	cluster 2				Bovismorbificans	cluster 1	SRR3137277	FDA00004972
196	QDND01	Bovismorbificans	cluster 2				Bovismorbificans	cluster 2	QDND01	196
FSIS21720703	SRR6345264	Bovismorbificans	cluster 2				Bovismorbificans	cluster 2	SRR6440236	FSIS11706627
FSIS1608953	SRR5084491	Bovismorbificans	cluster 2				Bovismorbificans	cluster 2	AZKV01	Sal676
FDA00001726	SRR6208541	Bovismorbificans	cluster 2				Bovismorbificans	cluster 2	AZKU01	Sal680
FSIS11705043	SRR6336400	Bovismorbificans	cluster 2				Bovismorbificans	cluster 2	AZKR01	Sal677
FSIS21720805	SRR6419018	Bovismorbificans	cluster 2				Bovismorbificans	cluster 2	SRR1556930	VA-WGS-00264
FSIS11808285	SRR6904870	Bovismorbificans	cluster 2				Bovismorbificans	cluster 2	SRR5173496	PNUSAS006896
FSIS1605762	SRR3199696	Bovismorbificans	cluster 2				Muenchen	cluster 3	SRR3242166	FDA00003064
Sal677	AZKR01	Bovismorbificans	cluster 2				Muenchen	cluster 3	SRR1427702	FSE0142
FDA00001031	SRR2102466	Hindmarsh	cluster 2				Bovismorbificans	cluster 1	MYFV01	02-0459
VA-WGS-00264	SRR1556930	Bovismorbificans	cluster 2				Bovismorbificans	cluster 1	AZKO02	Sal185
PNUSAS006896	SRR5173496	Bovismorbificans	cluster 2				Muenchen	cluster 1	AOXN01	ATCC 8388
PNUSAS018170	SRR5865206	Bovismorbificans	cluster 2				Muenchen	cluster 1	AUQE01	RKS4129
PNUSAS002653	SRR3930271	Bovismorbificans	cluster 2				Bovismorbificans	cluster 1	HF969015	3114
PNUSAS008672	SRR5341695	Bovismorbificans	cluster 2				Bovismorbificans	cluster 1	CQPE01	A8737
FDA00003263	SRR1646527	Bovismorbificans	cluster 2				Bovismorbificans	cluster 1	CQPB01	3114
PNUSAS012799	SRR5501179	Bovismorbificans	cluster 2				Bovismorbificans	cluster 1	CQPG01	D1253
CFSAN006232	SRR965140	Bovismorbificans	cluster 2				Bovismorbificans	cluster 1	SRR5412445	154841
ADRDL-16-12667	SRR5000218	Bovismorbificans	cluster 2				Bovismorbificans	cluster 1	CTBG01	653308
Sal185	AZKO02	Bovismorbificans	cluster 1				Bovismorbificans	cluster 1	CSTM01	276608
NPHL 170792	SRR6663607	Bovismorbificans	cluster 1				Bovismorbificans	cluster 1	CSTH01	499208
PNUSAS011925	SRR5605962	Bovismorbificans	cluster 1				Muenchen	cluster 2	QDPQ01	128
159653	SRR5412492	Bovismorbificans	cluster 1				Muenchen	cluster 2	SRR6895845	PNUSAS029489
457303	SRR7495765	Bovismorbificans	cluster 1				Muenchen	cluster 2	SRR5740043	2015AM-2017
385894	SRR7277899	Bovismorbificans	cluster 1				Muenchen	cluster 2	SRR1631190	AZ-TG74460
142472	SRR5412499	Bovismorbificans	cluster 1				Muenchen	cluster 2	LHIJ01	CVM N46833
122208	SRR7456946	Bovismorbificans	cluster 1				Muenchen	cluster 2	SRR5805042	IA-2014047415
PNUSAS002782	SRR3897930	Bovismorbificans	cluster 1				Muenchen	cluster 2	SRR2102469	TX-ACF1402276
208947	SRR5412487	Bovismorbificans	cluster 1				Muenchen	cluster 2	SRR1363311	WAPHL-SAL-A00406
249342	SRR5412524	Bovismorbificans	cluster 1				Muenchen	cluster 2	MXGC01	BCW_2170
218462	SRR5412432	Bovismorbificans	cluster 1				Muenchen	cluster 2	MXRH01	BCW_3981
FDA00000400	SRR2533413	Hindmarsh	cluster 1				Muenchen	cluster 2	LHMH01	CVM N51242
FDA00000081	SRR3286758	Bovismorbificans	cluster 1				Muenchen	cluster 2	SRR1588674	WAPHL_SAL-A00568
FDA00001843	SRR2585569	Bovismorbificans	cluster 1				Muenchen	cluster 2	SRR1952686	CFSAN006172
91-0332	MZFY01	Bovismorbificans	cluster 1				Muenchen	cluster 2	SRR1958087	48273
115994	SRR7159899	Bovismorbificans	cluster 1				Muenchen	cluster 2	SRR1970331	65115
	SRR4273697	Bovismorbificans	cluster 1				Muenchen	cluster 1	QDOQ01	157
282592	SRR5412514	Bovismorbificans	cluster 1				Muenchen	cluster 1	SRR5573059	CVM 43760
PNUSAS007462	SRR5221535	Bovismorbificans	cluster 1				Muenchen	cluster 1	SRR1060658	CDC B2026
299804	SRR5412452	Bovismorbificans	cluster 1				Muenchen	cluster 1	SRR6129256
242376	SRR5412500	Bovismorbificans	cluster 1				Muenchen	cluster 1	SRR1157604	FAR0045
PNUSAS003360	SRR4099590	Bovismorbificans	cluster 1				Muenchen	cluster 1	SRR2910997	FDA00000520
97269	SRR3049817	Bovismorbificans	cluster 1				Muenchen	cluster 1	SRR7183160	FSIS11809913
223590	SRR5412498	Bovismorbificans	cluster 1				Muenchen	cluster 1	MATF01	SMu01
Sal644	AZLC01	Bovismorbificans	cluster 1				Muenchen	cluster 1	PJAL01	17-030379-0001
PNUSAS027208	SRR6289950	Bovismorbificans	cluster 1				Muenchen	cluster 1	MXIO01	BCW_2052
513476	SRR7471123	Bovismorbificans	cluster 1				Muenchen	cluster 1	SRR1177322	CFSAN002871
CFSAN045337	SRR3465358	Bovismorbificans	cluster 1				Muenchen	cluster 1	MEKG01	CFSAN039541
CFSAN045336	SRR3465357	Bovismorbificans	cluster 1				Muenchen	cluster 1	SRR7234614	PNUSAS041297
212782	SRR5412525	Bovismorbificans	cluster 1				Muenchen	cluster 1	SRR6833425	MOD1-Tw-39
PNUSAS003488	SRR4099593	Bovismorbificans	cluster 1				Muenchen	cluster 1	ARYX01	08-1125
02-0459	MYFV01	Bovismorbificans	cluster 1				Muenchen	cluster 1	SRR6807507	MOD1-Lipp-659
02-0459	SRR1753647	Bovismorbificans	cluster 1				Muenchen	cluster 1	MLSV01	CFSAN044915
64989	SRR1958666	Bovismorbificans	cluster 1				Muenchen	cluster 1	NLCG02	CFSAN051040
FDA00000441	SRR4427089	Bovismorbificans	cluster 1				Muenchen	cluster 1	SRR6807554	MOD1-Chser-110
H124760774	SRR1645882	Bovismorbificans	cluster 1				Muenchen	cluster 1	SRR6833746	MOD1-Dem-4
6469	SRR3048917	Bovismorbificans	cluster 1				Muenchen	cluster 1	SRR2966846	MOD1-Jwm-021-1
261335	SRR5412408	Bovismorbificans	cluster 1				Muenchen	cluster 1	SRR5896169	2015AM-1470
18511	SRR3049289	Bovismorbificans	cluster 1				Muenchen	cluster 1	NLCA02	CFSAN051033
218476	SRR5412411	Bovismorbificans	cluster 1				Muenchen	cluster 1	SRR6833739	MOD1-Scm-38
495810	SRR7469068	Bovismorbificans	cluster 1				Bovismorbificans	cluster 2	SRR5584552	PNUSAS013102
128210	SRR5412485	Bovismorbificans	cluster 1				Bovismorbificans	cluster 2	SRR6345507	PNUSAS028213
FMA0176	SRR1346250	Bovismorbificans	cluster 1				Bovismorbificans	cluster 2	SRR1646561	FDA00003265
278199	SRR5412453	Bovismorbificans	cluster 1				Bovismorbificans	cluster 2	SRR1646518	FDA00003264
FDA00001663	SRR3606557	Bovismorbificans	cluster 1				Bovismorbificans	cluster 2	SRR4273698
65439	SRR1967442	Bovismorbificans	cluster 1				Bovismorbificans	cluster 2	SRR2981147	FSIS1504461
9130	SRR1965639	Bovismorbificans	cluster 1				Bovismorbificans	cluster 2	SRR1646562	FDA00003266
FDA00004273	SRR7369925	Bovismorbificans	cluster 1				Bovismorbificans	cluster 2	SRR4044967	FSIS1607385
93539	SRR1967641	Bovismorbificans	cluster 1				Bovismorbificans	cluster 2	SRR4039933	PNUSAS003337
260215	SRR5412438	Bovismorbificans	cluster 1				Bovismorbificans	cluster 2	SRR6345264	FSIS21720703
528544	SRR7257407	Bovismorbificans	cluster 1				Bovismorbificans	cluster 2	SRR5084491	FSIS1608953
93515	SRR1970289	Bovismorbificans	cluster 1				Bovismorbificans	cluster 2	SRR6208541	FDA00001726
BCW_2648	SRR1118698	Bovismorbificans	cluster 1				Bovismorbificans	cluster 2	SRR6336400	FSIS11705043
M123	ERR230433	Bovismorbificans	cluster 1				Bovismorbificans	cluster 2	SRR6419018	FSIS21720805
40305	SRR1965978	Bovismorbificans	cluster 1				Bovismorbificans	cluster 2	SRR6904870	FSIS11808285
H120340709	SRR1645426	Bovismorbificans	cluster 1				Bovismorbificans	cluster 2	SRR3199696	FSIS1605762
462575	SRR7359583	Bovismorbificans	cluster 1				Hindmarsh	cluster 2	SRR2102466	FDA00001031
A31126	CGIA01	Bovismorbificans	cluster 1				Bovismorbificans	cluster 2	SRR5865206	PNUSAS018170
ARIM-SBVM1410-05	SRR3721474	Bovismorbificans	cluster 1				Bovismorbificans	cluster 2	SRR3930271	PNUSAS002653
275793	SRR5412517	Bovismorbificans	cluster 1				Bovismorbificans	cluster 2	SRR5341695	PNUSAS008672
96-0578	MYFY01	Bovismorbificans	cluster 1				Bovismorbificans	cluster 2	SRR1646527	FDA00003263
310289	SRR5412530	Bovismorbificans	cluster 1				Bovismorbificans	cluster 2	SRR5501179	PNUSAS012799
499208	CSTH01	Bovismorbificans	cluster 1				Bovismorbificans	cluster 2	SRR965140	CFSAN006232
276608	CSTM01	Bovismorbificans	cluster 1				Bovismorbificans	cluster 2	SRR5000218	ADRDL-16-12667
46558	SRR1965805	Bovismorbificans	cluster 1				Bovismorbificans	cluster 1	SRR6663607	NPHL 170792
388636	SRR7275021	Bovismorbificans	cluster 1				Bovismorbificans	cluster 1	SRR5605962	PNUSAS011925
CFSAN031523	SRR4243069	Bovismorbificans	cluster 1				Bovismorbificans	cluster 1	SRR5412492	159653
333393	SRR5412405	Bovismorbificans	cluster 1				Bovismorbificans	cluster 1	SRR7495765	457303
FSIS11807571	SRR6704096	Bovismorbificans	cluster 1				Bovismorbificans	cluster 1	SRR7277899	385894
FSIS11811127	SRR7442252	Bovismorbificans	cluster 1				Bovismorbificans	cluster 1	SRR5412499	142472
FSIS11704643	SRR6143716	Bovismorbificans	cluster 1				Bovismorbificans	cluster 1	SRR7456946	122208
CFSAN025353	SRR4011088	Bovismorbificans	cluster 1				Bovismorbificans	cluster 1	SRR3897930	PNUSAS002782
FSIS11807371	SRR6681177	Bovismorbificans	cluster 1				Bovismorbificans	cluster 1	SRR5412487	208947
CRJJGF_00070	SRR1686545	Bovismorbificans	cluster 1				Bovismorbificans	cluster 1	SRR5412524	249342
91963	SRR3049093	Bovismorbificans	cluster 1				Bovismorbificans	cluster 1	SRR5412432	218462
513486	SRR7410277	Bovismorbificans	cluster 1				Hindmarsh	cluster 1	SRR2533413	FDA00000400
449708	SRR7506891	Bovismorbificans	cluster 1				Bovismorbificans	cluster 1	SRR3286758	FDA00000081
185979	SRR5412456	Bovismorbificans	cluster 1				Bovismorbificans	cluster 1	SRR2585569	FDA00001843
391281	SRR7415103	Bovismorbificans	cluster 1				Bovismorbificans	cluster 1	MZFY01	91-0332
138325	SRR5412444	Bovismorbificans	cluster 1				Bovismorbificans	cluster 1	SRR7159899	115994
143643	SRR5412389	Bovismorbificans	cluster 1				Bovismorbificans	cluster 1	SRR4273697
311410	SRR5412451	Bovismorbificans	cluster 1				Bovismorbificans	cluster 1	SRR5412514	282592
65036	SRR1966561	Bovismorbificans	cluster 1				Bovismorbificans	cluster 1	SRR5221535	PNUSAS007462
6459	SRR1969958	Bovismorbificans	cluster 1				Bovismorbificans	cluster 1	SRR5412452	299804
131538	SRR2168394	Bovismorbificans	cluster 1				Bovismorbificans	cluster 1	SRR5412500	242376
330455	SRR5412481	Bovismorbificans	cluster 1				Bovismorbificans	cluster 1	SRR4099590	PNUSAS003360
73205	SRR1968983	Bovismorbificans	cluster 1				Bovismorbificans	cluster 1	SRR3049817	97269
154841	SRR5412445	Bovismorbificans	cluster 1				Bovismorbificans	cluster 1	SRR5412498	223590
453248	SRR7475359	Bovismorbificans	cluster 1				Bovismorbificans	cluster 1	AZLC01	Sal644
290690	SRR5412496	Bovismorbificans	cluster 1				Bovismorbificans	cluster 1	SRR6289950	PNUSAS027208
653308	CTBG01	Bovismorbificans	cluster 1				Bovismorbificans	cluster 1	SRR7471123	513476
229836	SRR5412406	Bovismorbificans	cluster 1				Bovismorbificans	cluster 1	SRR3465358	CFSAN045337
451996	SRR7187926	Bovismorbificans	cluster 1				Bovismorbificans	cluster 1	SRR3465357	CFSAN045336
56968	SRR2168409	Bovismorbificans	cluster 1				Bovismorbificans	cluster 1	SRR5412525	212782
78709	SRR1959391	Bovismorbificans	cluster 1				Bovismorbificans	cluster 1	SRR4099593	PNUSAS003488
299838	SRR5412400	Bovismorbificans	cluster 1				Bovismorbificans	cluster 1	SRR1753647	02-0459
3114	HF969015	Bovismorbificans	cluster 1				Bovismorbificans	cluster 1	SRR1958666	64989
392931	SRR7439483	Bovismorbificans	cluster 1				Bovismorbificans	cluster 1	SRR4427089	FDA00000441
417417	SRR7523830	Bovismorbificans	cluster 1				Bovismorbificans	cluster 1	SRR1645882	H124760774
311163	SRR7414899	Bovismorbificans	cluster 1				Bovismorbificans	cluster 1	SRR3048917	6469
A16982	CQPF01	Bovismorbificans	cluster 1				Bovismorbificans	cluster 1	SRR5412408	261335
A8737	CQPE01	Bovismorbificans	cluster 1				Bovismorbificans	cluster 1	SRR3049289	18511
D4451	CQPK01	Bovismorbificans	cluster 1				Bovismorbificans	cluster 1	SRR5412411	218476
3114	CQPB01	Bovismorbificans	cluster 1				Bovismorbificans	cluster 1	SRR7469068	495810
D1253	CQPG01	Bovismorbificans	cluster 1				Bovismorbificans	cluster 1	SRR5412485	128210
130392	SRR2168403	Bovismorbificans	cluster 1				Bovismorbificans	cluster 1	SRR1346250	FMA0176
416286	SRR7426475	Bovismorbificans	cluster 1				Bovismorbificans	cluster 1	SRR5412453	278199
404341	SRR7298400	Bovismorbificans	cluster 1				Bovismorbificans	cluster 1	SRR3606557	FDA00001663
A5893	CQPO01	Bovismorbificans	cluster 1				Bovismorbificans	cluster 1	SRR1967442	65439
3180	CQPJ01	Bovismorbificans	cluster 1				Bovismorbificans	cluster 1	SRR1965639	9130
A1668	CQPN01	Bovismorbificans	cluster 1				Bovismorbificans	cluster 1	SRR7369925	FDA00004273
A1608	CQPI01	Bovismorbificans	cluster 1				Bovismorbificans	cluster 1	SRR1967641	93539
D993	CQPH01	Bovismorbificans	cluster 1				Bovismorbificans	cluster 1	SRR5412438	260215
353836	SRR5412515	Bovismorbificans	cluster 1				Bovismorbificans	cluster 1	SRR7257407	528544
D4891	CQPD01	Bovismorbificans	cluster 1				Bovismorbificans	cluster 1	SRR1970289	93515
193400	SRR3322142	Bovismorbificans	cluster 1				Bovismorbificans	cluster 1	SRR1118698	BCW_2648
PNUSAS013377	SRR5584942	Bovismorbificans	cluster 1				Bovismorbificans	cluster 1	ERR230433	M123
PNUSAS002156	SRR3669921	Bovismorbificans	cluster 1				Bovismorbificans	cluster 1	SRR1965978	40305
FDA00004972	SRR3137277	Bovismorbificans	cluster 1				Bovismorbificans	cluster 1	SRR1645426	H120340709
Sal610	AZKX01	Bovismorbificans	cluster 1				Bovismorbificans	cluster 1	SRR7359583	462575
Sal617	AZLA01	Bovismorbificans	cluster 1				Bovismorbificans	cluster 1	CGIA01	A31126
Sal609	AZKW01	Bovismorbificans	cluster 1				Bovismorbificans	cluster 1	SRR3721474	ARIM-SBVM1410-05
ARIM-SBVM730-07	SRR3721475	Bovismorbificans	cluster 1				Bovismorbificans	cluster 1	SRR5412517	275793
51892776	CSTI01	Bovismorbificans	cluster 1				Bovismorbificans	cluster 1	MYFY01	96-0578
232714	SRR5412503	Bovismorbificans	cluster 1				Bovismorbificans	cluster 1	SRR5412530	310289
308486	SRR5412455	Bovismorbificans	cluster 1				Bovismorbificans	cluster 1	SRR1965805	46558
FAR0129	SRR1263448	Bovismorbificans	cluster 1				Bovismorbificans	cluster 1	SRR7275021	388636
FDA00003911	SRR1562617	Bovismorbificans	cluster 1				Bovismorbificans	cluster 1	SRR4243069	CFSAN031523
411469	SRR7358956	Bovismorbificans	cluster 1				Bovismorbificans	cluster 1	SRR5412405	333393
101306	SRR2168400	Bovismorbificans	cluster 1				Bovismorbificans	cluster 1	SRR6704096	FSIS11807571
A1104	CQPA01	Bovismorbificans	cluster 1				Bovismorbificans	cluster 1	SRR7442252	FSIS11811127
3476	CQPC01	Bovismorbificans	cluster 1				Bovismorbificans	cluster 1	SRR6143716	FSIS11704643
45578	SRR1969672	Bovismorbificans	cluster 1				Bovismorbificans	cluster 1	SRR4011088	CFSAN025353
271166	SRR5412516	Bovismorbificans	cluster 1				Bovismorbificans	cluster 1	SRR6681177	FSIS11807371
PNUSAS004784	SRR4449989	Bovismorbificans	cluster 1				Bovismorbificans	cluster 1	SRR1686545	CRJJGF_00070
PNUSAS020548	SRR5955622	Bovismorbificans	cluster 1				Bovismorbificans	cluster 1	SRR3049093	91963
BCW_2845	MXXQ01	Bovismorbificans	cluster 1				Bovismorbificans	cluster 1	SRR7410277	513486
06-0615	MYGL01	Bovismorbificans	cluster 1				Bovismorbificans	cluster 1	SRR7506891	449708
H125040595	SRR1646399	Bovismorbificans	cluster 1				Bovismorbificans	cluster 1	SRR5412456	185979
299004	SRR5412377	Bovismorbificans	cluster 1				Bovismorbificans	cluster 1	SRR7415103	391281
75968	SRR1967088	Bovismorbificans	cluster 1				Bovismorbificans	cluster 1	SRR5412444	138325
420534	SRR7251068	Bovismorbificans	cluster 1				Bovismorbificans	cluster 1	SRR5412389	143643
363587	SRR7298397	Bovismorbificans	cluster 1				Bovismorbificans	cluster 1	SRR5412451	311410
438780	SRR7426611	Bovismorbificans	cluster 1				Bovismorbificans	cluster 1	SRR1966561	65036
H130161208	SRR1646411	Bovismorbificans	cluster 1				Bovismorbificans	cluster 1	SRR1969958	6459
FDA00003839	SRR1783167	Hindmarsh	cluster 1				Bovismorbificans	cluster 1	SRR2168394	131538
478619	SRR7414972	Bovismorbificans	cluster 1				Bovismorbificans	cluster 1	SRR5412481	330455
							Bovismorbificans	cluster 1	SRR1968983	73205
							Bovismorbificans	cluster 1	SRR7475359	453248
FSIS1606883	SRR3710239	Bovismorbificans					Bovismorbificans	cluster 1	SRR5412496	290690
PNUSAS002048	SRR3473907						Bovismorbificans	cluster 1	SRR5412406	229836
Sal683	AOZL01						Bovismorbificans	cluster 1	SRR7187926	451996
	SRR965140						Bovismorbificans	cluster 1	SRR2168409	56968
2013K-0459	SRR1614889						Bovismorbificans	cluster 1	SRR1959391	78709
CFSAN006232	SRR965140						Bovismorbificans	cluster 1	SRR5412400	299838
FDA00001031	SRR2102466						Bovismorbificans	cluster 1	SRR7439483	392931
FSIS1504461	SRR2981147						Bovismorbificans	cluster 1	SRR7523830	417417
FSIS1605762	SRR3199696						Bovismorbificans	cluster 1	SRR7414899	311163
PNUSAS002048	SRR3473907						Bovismorbificans	cluster 1	CQPF01	A16982
							Bovismorbificans	cluster 1	CQPK01	D4451
Sal Muenchenstr. RKS4129 SARA64	SRR5598928						Bovismorbificans	cluster 1	SRR2168403	130392
Muenchen str. CFSAN000585 SARA65	SRR5598924						Bovismorbificans	cluster 1	SRR7426475	416286
Muenchen str. CFSAN000587 SARA67	SRR5819759						Bovismorbificans	cluster 1	SRR7298400	404341
Muenchen str. SARB32	SRR514864						Bovismorbificans	cluster 1	CQPO01	A5893
Muenchen str. SARB32	SRR514865						Bovismorbificans	cluster 1	CQPJ01	3180
Muenchen str. CFSAN000594 SARB33	SRR9061468						Bovismorbificans	cluster 1	CQPN01	A1668
Muenchen str. SARB34	SRR516373						Bovismorbificans	cluster 1	CQPI01	A1608
Muenchen str. SARB34	SRR516370						Bovismorbificans	cluster 1	CQPH01	D993
							Bovismorbificans	cluster 1	SRR5412515	353836
							Bovismorbificans	cluster 1	CQPD01	D4891
							Bovismorbificans	cluster 1	SRR3322142	193400
							Bovismorbificans	cluster 1	SRR5584942	PNUSAS013377
							Bovismorbificans	cluster 1	SRR3669921	PNUSAS002156
							Bovismorbificans	cluster 1	AZKX01	Sal610
							Bovismorbificans	cluster 1	AZLA01	Sal617
							Bovismorbificans	cluster 1	AZKW01	Sal609
							Bovismorbificans	cluster 1	SRR3721475	ARIM-SBVM730-07
							Bovismorbificans	cluster 1	CSTI01	51892776
							Bovismorbificans	cluster 1	SRR5412503	232714
							Bovismorbificans	cluster 1	SRR5412455	308486
							Bovismorbificans	cluster 1	SRR1263448	FAR0129
							Bovismorbificans	cluster 1	SRR1562617	FDA00003911
							Bovismorbificans	cluster 1	SRR7358956	411469
							Bovismorbificans	cluster 1	SRR2168400	101306
							Bovismorbificans	cluster 1	CQPA01	A1104
							Bovismorbificans	cluster 1	CQPC01	3476
							Bovismorbificans	cluster 1	SRR1969672	45578
							Bovismorbificans	cluster 1	SRR5412516	271166
							Bovismorbificans	cluster 1	SRR4449989	PNUSAS004784
							Bovismorbificans	cluster 1	SRR5955622	PNUSAS020548
							Bovismorbificans	cluster 1	MXXQ01	BCW_2845
							Bovismorbificans	cluster 1	SRR1646399	H125040595
							Bovismorbificans	cluster 1	SRR5412377	299004
							Bovismorbificans	cluster 1	SRR1967088	75968
							Bovismorbificans	cluster 1	SRR7251068	420534
							Bovismorbificans	cluster 1	SRR7298397	363587
							Bovismorbificans	cluster 1	SRR7426611	438780
							Bovismorbificans	cluster 1	SRR1646411	H130161208
							Hindmarsh	cluster 1	SRR1783167	FDA00003839
							Bovismorbificans	cluster 1	SRR7414972	478619
							Bovismorbificans		SRR3710239	FSIS1606883
							Muenchen		SRR3473907	PNUSAS002048
							Muenchen		AOZL01	Sal683
							Muenchen		SRR1614889	2013K-0459
							Muenchen		SRR5598928	Sal Muenchenstr. RKS4129 SARA64
							Muenchen		SRR5598924	Muenchen str. CFSAN000585 SARA65
							Muenchen		SRR5819759	Muenchen str. CFSAN000587 SARA67
							Muenchen		SRR514864	Muenchen str. SARB32
							Muenchen		SRR514865	Muenchen str. SARB32
							Muenchen		SRR9061468	Muenchen str. CFSAN000594 SARB33
							Muenchen		SRR516373	Muenchen str. SARB34
							Muenchen		SRR516370	Muenchen str. SARB34
									no assembly?
									AZKY01
									AZKZ01
									AZKS01
									AZKT01
									AZLB01
									AZKQ01
									AZKP01
									UGVQ01
									WFIN01
									MXTR01
									QAUR01
									MXUD01
									MXTU01
									MXUB01
									MXTY01
									MXTS01
									MXTT01
									MXUA01
									MXTV01
									MXTZ01
									AZKQ02

## Sheet: Jaccard Matrix
MYGL01	Bovismorbificans	B1	1	0.827053	0.823751	0.838631	0.859473	0.845673	0.840026	0.831082	0.858269	0.827227	0.841161	0.860475	0.847894	0.8527	0.840303	0.83572	0.830942	0.821986	0.859753	0.85957	0.851438	0.853022	0.843467	0.86619	0.857454	0.863782	0.856217	0.850489	0.862189	0.859359	0.860363	0.858063	0.855761	0.852627	0.853385	0.848403	0.844257	0.844334	0.850543	0.840074	0.84327	0.835609	0.790136	0.864011	0.862985	0.852196	0.858926
SRR3137277	Bovismorbificans	B1	0.827053	1	0.838386	0.856828	0.914057	0.899286	0.892715	0.884161	0.903503	0.86887	0.886479	0.907591	0.864998	0.861144	0.852864	0.846264	0.845939	0.840836	0.881058	0.880491	0.871647	0.887936	0.863898	0.883943	0.875231	0.883035	0.875945	0.870674	0.879525	0.876546	0.877393	0.874571	0.875573	0.871942	0.869747	0.87134	0.871459	0.863648	0.876211	0.865459	0.866033	0.853878	0.800293	0.874286	0.862842	0.863725	0.869535
MYFV01	Bovismorbificans	B1	0.823751	0.838386	1	0.938242	0.864975	0.851103	0.844925	0.836471	0.859574	0.827571	0.843058	0.862499	0.959667	0.949728	0.933654	0.927053	0.923172	0.928331	0.919572	0.91965	0.909802	0.9112	0.902353	0.926636	0.91929	0.92395	0.917369	0.911212	0.92245	0.919766	0.919187	0.917327	0.91695	0.912675	0.908154	0.902992	0.903435	0.900739	0.910379	0.899119	0.895899	0.888508	0.941583	0.879924	0.876839	0.867416	0.874162
AZKO02	Bovismorbificans	B1	0.838631	0.856828	0.938242	1	0.882462	0.86887	0.862465	0.854174	0.876014	0.843953	0.861479	0.881079	0.971199	0.960174	0.951845	0.945209	0.941013	0.940755	0.95205	0.949504	0.938757	0.938323	0.929828	0.946854	0.936945	0.943105	0.935373	0.928968	0.940538	0.937929	0.936974	0.935272	0.935113	0.930088	0.925345	0.929118	0.929242	0.919134	0.929255	0.917026	0.913383	0.912562	0.891967	0.898454	0.893704	0.89266	0.893174
HF969015	Bovismorbificans	B1	0.859473	0.914057	0.864975	0.882462	1	0.978824	0.972279	0.960787	0.948485	0.912502	0.931673	0.953788	0.89343	0.898475	0.880654	0.873129	0.869681	0.865565	0.906458	0.906277	0.897778	0.899507	0.889185	0.913263	0.904067	0.910756	0.902518	0.896312	0.909363	0.9053	0.906943	0.904419	0.90206	0.898788	0.900288	0.89334	0.889626	0.889078	0.896256	0.884878	0.883686	0.875335	0.824656	0.89879	0.90098	0.892344	0.899664
CQPE01	Bovismorbificans	B1	0.845673	0.899286	0.851103	0.86887	0.978824	1	0.97225	0.964302	0.932927	0.91509	0.933465	0.950513	0.8793	0.883918	0.866975	0.858968	0.855719	0.852103	0.891826	0.891566	0.883764	0.885582	0.875522	0.898537	0.889463	0.896282	0.887979	0.882075	0.895464	0.890754	0.892772	0.890434	0.887478	0.884799	0.886174	0.878882	0.875223	0.876021	0.881905	0.870695	0.869737	0.861301	0.81182	0.884828	0.886704	0.87877	0.886194
CQPB01	Bovismorbificans	B1	0.840026	0.892715	0.844925	0.862465	0.972279	0.97225	1	0.960959	0.926074	0.910438	0.929351	0.944824	0.872814	0.877657	0.860702	0.852665	0.849416	0.845882	0.885338	0.885054	0.877418	0.879084	0.869244	0.892039	0.882992	0.889754	0.881505	0.87563	0.88882	0.884174	0.886402	0.884144	0.88093	0.878296	0.879927	0.872606	0.86881	0.869173	0.875585	0.864472	0.863415	0.85508	0.805935	0.878408	0.880605	0.872261	0.879717
CQPG01	Bovismorbificans	B1	0.831082	0.884161	0.836471	0.854174	0.960787	0.964302	0.960959	1	0.916469	0.907985	0.925265	0.937403	0.864495	0.868868	0.852132	0.844129	0.840894	0.83797	0.876571	0.876359	0.868725	0.87047	0.860766	0.883314	0.874574	0.881322	0.87282	0.867172	0.880171	0.875484	0.877706	0.875488	0.872286	0.869687	0.870941	0.863851	0.860224	0.861584	0.867015	0.85588	0.85489	0.846616	0.797762	0.86968	0.871428	0.863639	0.871103
SRR5412445	Bovismorbificans	B1	0.858269	0.903503	0.859574	0.876014	0.948485	0.932927	0.926074	0.916469	1	0.955098	0.940189	0.962793	0.887142	0.895392	0.874666	0.880187	0.863129	0.860585	0.899669	0.899343	0.891697	0.893521	0.88357	0.906332	0.897398	0.90381	0.896029	0.889808	0.903477	0.898597	0.900817	0.898147	0.895345	0.893011	0.894331	0.886565	0.88314	0.883232	0.889796	0.878792	0.877805	0.868689	0.820072	0.895946	0.900055	0.889211	0.89643
CTBG01	Bovismorbificans	B1	0.827227	0.86887	0.827571	0.843953	0.912502	0.91509	0.910438	0.907985	0.955098	1	0.930134	0.942184	0.855048	0.862267	0.842146	0.847002	0.830912	0.829328	0.865987	0.865701	0.858452	0.860081	0.850745	0.872556	0.86422	0.870717	0.862387	0.857256	0.869946	0.865092	0.867336	0.865106	0.861834	0.859624	0.860837	0.853672	0.850048	0.855545	0.856793	0.845997	0.844916	0.836452	0.789449	0.862374	0.866768	0.856055	0.863376
CSTM01	Bovismorbificans	B1	0.841161	0.886479	0.843058	0.861479	0.931673	0.933465	0.929351	0.925265	0.940189	0.930134	1	0.962276	0.871276	0.879066	0.858794	0.850679	0.847464	0.844195	0.884071	0.883834	0.876275	0.877764	0.867891	0.890953	0.881911	0.888559	0.880181	0.874473	0.887849	0.883132	0.885402	0.882862	0.879739	0.877122	0.878191	0.871141	0.867347	0.871997	0.874293	0.863079	0.861555	0.853261	0.803678	0.880008	0.884879	0.873493	0.880995
CSTH01	Bovismorbificans	B1	0.860475	0.907591	0.862499	0.881079	0.953788	0.950513	0.944824	0.937403	0.962793	0.942184	0.962276	1	0.891271	0.899201	0.878775	0.870408	0.867117	0.86328	0.904444	0.904329	0.896413	0.897843	0.887699	0.91149	0.902049	0.909241	0.900504	0.894577	0.908226	0.903518	0.905575	0.902838	0.900122	0.89727	0.898594	0.891302	0.887428	0.888351	0.894295	0.882866	0.881513	0.873017	0.822328	0.900527	0.905426	0.893923	0.901745
SRR6663607	Bovismorbificans	B1	0.847894	0.864998	0.959667	0.971199	0.89343	0.8793	0.872814	0.864495	0.887142	0.855048	0.871276	0.891271	1	0.982481	0.963287	0.957525	0.953035	0.958563	0.951684	0.951907	0.939994	0.941369	0.930639	0.959154	0.949543	0.954934	0.947521	0.941298	0.951916	0.950176	0.948606	0.946478	0.947283	0.941494	0.936481	0.933046	0.935131	0.931003	0.941692	0.929149	0.924702	0.918422	0.911848	0.908164	0.903583	0.89504	0.902343
SRR5605962	Bovismorbificans	B1	0.8527	0.861144	0.949728	0.960174	0.898475	0.883918	0.877657	0.868868	0.895392	0.862267	0.879066	0.899201	0.982481	1	0.953929	0.946456	0.94244	0.949933	0.940535	0.940862	0.930834	0.93221	0.921294	0.94805	0.938717	0.944446	0.936643	0.930598	0.942668	0.939832	0.93897	0.936858	0.936485	0.932079	0.926978	0.921752	0.923398	0.921763	0.930945	0.9189	0.915495	0.907844	0.903353	0.911921	0.915549	0.904566	0.911772
SRR5412492	Bovismorbificans	B1	0.840303	0.852864	0.933654	0.951845	0.880654	0.866975	0.860702	0.852132	0.874666	0.842146	0.858794	0.878775	0.963287	0.953929	1	0.984658	0.98073	0.933174	0.940466	0.939816	0.932053	0.934009	0.936531	0.946784	0.943904	0.944922	0.952866	0.945995	0.95984	0.954568	0.956178	0.954296	0.951357	0.949027	0.9445	0.934131	0.923202	0.920553	0.931649	0.919697	0.937517	0.926776	0.89269	0.898818	0.904556	0.885647	0.892735
SRR7495765	Bovismorbificans	B1	0.83572	0.846264	0.927053	0.945209	0.873129	0.858968	0.852665	0.844129	0.880187	0.847002	0.850679	0.870408	0.957525	0.946456	0.984658	1	0.975051	0.924815	0.935311	0.934379	0.923156	0.925369	0.927888	0.940955	0.938471	0.937805	0.947415	0.940268	0.950584	0.948768	0.947027	0.945095	0.945869	0.940677	0.935507	0.928875	0.91849	0.915092	0.926183	0.914147	0.928409	0.921775	0.885722	0.890645	0.896328	0.877278	0.884113
SRR7277899	Bovismorbificans	B1	0.830942	0.845939	0.923172	0.941013	0.869681	0.855719	0.849416	0.840894	0.863129	0.830912	0.847464	0.867117	0.953035	0.94244	0.98073	0.975051	1	0.921057	0.931062	0.929888	0.919449	0.921635	0.924193	0.936536	0.933865	0.9336	0.943024	0.935752	0.946789	0.944152	0.943336	0.941211	0.941226	0.936945	0.931803	0.924977	0.914016	0.91132	0.922193	0.910297	0.925157	0.917394	0.883535	0.887124	0.893032	0.874279	0.881003
SRR5412499	Bovismorbificans	B1	0.821986	0.840836	0.928331	0.940755	0.865565	0.852103	0.845882	0.83797	0.860585	0.829328	0.844195	0.86328	0.958563	0.949933	0.933174	0.924815	0.921057	1	0.922103	0.921359	0.91369	0.915296	0.90497	0.925127	0.916307	0.922757	0.915126	0.909056	0.921872	0.917147	0.918402	0.91728	0.914271	0.911859	0.90749	0.903454	0.904845	0.900453	0.908752	0.897506	0.896218	0.889886	0.88425	0.880558	0.875819	0.87063	0.875406
SRR7456946	Bovismorbificans	B1	0.859753	0.881058	0.919572	0.95205	0.906458	0.891826	0.885338	0.876571	0.899669	0.865987	0.884071	0.904444	0.951684	0.940535	0.940466	0.935311	0.931062	0.922103	1	0.980885	0.969084	0.972041	0.959552	0.978953	0.969306	0.975054	0.968797	0.961244	0.973251	0.970423	0.968958	0.967124	0.96685	0.962464	0.957423	0.959658	0.961779	0.950873	0.960915	0.94803	0.943924	0.944456	0.874544	0.924871	0.919331	0.917528	0.918344
SRR3897930	Bovismorbificans	B1	0.85957	0.880491	0.91965	0.949504	0.906277	0.891566	0.885054	0.876359	0.899343	0.865701	0.883834	0.904329	0.951907	0.940862	0.939816	0.934379	0.929888	0.921359	0.980885	1	0.981877	0.974507	0.962409	0.979487	0.969859	0.975406	0.96716	0.961306	0.971834	0.970548	0.968158	0.965983	0.967736	0.961057	0.955787	0.962813	0.966894	0.949523	0.961412	0.94833	0.94311	0.946255	0.874183	0.924594	0.919715	0.917354	0.918071
SRR5412487	Bovismorbificans	B1	0.851438	0.871647	0.909802	0.938757	0.897778	0.883764	0.877418	0.868725	0.891697	0.858452	0.876275	0.896413	0.939994	0.930834	0.932053	0.923156	0.919449	0.91369	0.969084	0.981877	1	0.965663	0.974242	0.966318	0.956953	0.964533	0.955664	0.949029	0.963497	0.957947	0.960003	0.957535	0.954909	0.952261	0.947548	0.950628	0.954337	0.938327	0.948735	0.936499	0.93517	0.933903	0.866592	0.916206	0.910901	0.910031	0.910744
SRR5412524	Bovismorbificans	B1	0.853022	0.887936	0.9112	0.938323	0.899507	0.885582	0.879084	0.87047	0.893521	0.860081	0.877764	0.897843	0.941369	0.93221	0.934009	0.925369	0.921635	0.915296	0.972041	0.974507	0.965663	1	0.957515	0.968367	0.958666	0.967925	0.960538	0.953934	0.965594	0.96024	0.961713	0.960716	0.95863	0.957129	0.95046	0.958718	0.961737	0.942805	0.950572	0.938085	0.939558	0.938431	0.868618	0.92613	0.912645	0.918318	0.920666
SRR5412432	Bovismorbificans	B1	0.843467	0.863898	0.902353	0.929828	0.889185	0.875522	0.869244	0.860766	0.88357	0.850745	0.867891	0.887699	0.930639	0.921294	0.936531	0.927888	0.924193	0.90497	0.959552	0.962409	0.974242	0.957515	1	0.955731	0.95196	0.952625	0.960576	0.95366	0.968439	0.962759	0.964595	0.963193	0.959219	0.957377	0.952835	0.957234	0.941177	0.927657	0.939301	0.927331	0.926049	0.921737	0.862908	0.907218	0.913326	0.900489	0.902059
SRR3286758	Bovismorbificans	B1	0.86619	0.883943	0.926636	0.946854	0.913263	0.898537	0.892039	0.883314	0.906332	0.872556	0.890953	0.91149	0.959154	0.94805	0.946784	0.940955	0.936536	0.925127	0.978953	0.979487	0.966318	0.968367	0.955731	1	0.983476	0.982195	0.974398	0.968365	0.979354	0.978039	0.976021	0.973725	0.974355	0.96834	0.963579	0.956215	0.96081	0.956756	0.968546	0.955265	0.950072	0.944251	0.880587	0.931814	0.927262	0.917599	0.925129
SRR2585569	Bovismorbificans	B1	0.857454	0.875231	0.91929	0.936945	0.904067	0.889463	0.882992	0.874574	0.897398	0.86422	0.881911	0.902049	0.949543	0.938717	0.943904	0.938471	0.933865	0.916307	0.969306	0.969859	0.956953	0.958666	0.95196	0.983476	1	0.97255	0.971588	0.965575	0.976178	0.975116	0.972803	0.970643	0.97154	0.965488	0.960455	0.953457	0.951797	0.947464	0.961583	0.948532	0.943064	0.935532	0.877457	0.922373	0.925619	0.908296	0.915678
MZFY01	Bovismorbificans	B1	0.863782	0.883035	0.92395	0.943105	0.910756	0.896282	0.889754	0.881322	0.90381	0.870717	0.888559	0.909241	0.954934	0.944446	0.944922	0.937805	0.9336	0.922757	0.975054	0.975406	0.964533	0.967925	0.952625	0.982195	0.97255	1	0.986044	0.979006	0.976762	0.973343	0.973056	0.971004	0.976786	0.971942	0.960991	0.952697	0.958752	0.96764	0.964111	0.951218	0.957138	0.954657	0.878337	0.93174	0.924046	0.917607	0.925574
SRR7159899	Bovismorbificans	B1	0.856217	0.875945	0.917369	0.935373	0.902518	0.887979	0.881505	0.87282	0.896029	0.862387	0.880181	0.900504	0.947521	0.936643	0.952866	0.947415	0.943024	0.915126	0.968797	0.96716	0.955664	0.960538	0.960576	0.974398	0.971588	0.986044	1	0.988443	0.984739	0.9823	0.980948	0.97912	0.985415	0.980677	0.969019	0.961312	0.952034	0.961386	0.958449	0.945612	0.950998	0.947602	0.876263	0.923768	0.927593	0.909524	0.91712
SRR4273697	Bovismorbificans	B1	0.850489	0.870674	0.911212	0.928968	0.896312	0.882075	0.87563	0.867172	0.889808	0.857256	0.874473	0.894577	0.941298	0.930598	0.945995	0.940268	0.935752	0.909056	0.961244	0.961306	0.949029	0.953934	0.95366	0.968365	0.965575	0.979006	0.988443	1	0.977551	0.976315	0.973984	0.97241	0.979353	0.973572	0.962231	0.954749	0.945829	0.954845	0.952713	0.939962	0.944442	0.942569	0.870211	0.917518	0.921694	0.903192	0.910726
SRR5412514	Bovismorbificans	B1	0.862189	0.879525	0.92245	0.940538	0.909363	0.895464	0.88882	0.880171	0.903477	0.869946	0.887849	0.908226	0.951916	0.942668	0.95984	0.950584	0.946789	0.921872	0.973251	0.971834	0.963497	0.965594	0.968439	0.979354	0.976178	0.976762	0.984739	0.977551	1	0.987599	0.989902	0.987471	0.983598	0.98193	0.976501	0.965636	0.953906	0.9508	0.962879	0.950291	0.948919	0.937351	0.881467	0.928483	0.934905	0.915156	0.922789
SRR5221535	Bovismorbificans	B1	0.859359	0.876546	0.919766	0.937929	0.9053	0.890754	0.884174	0.875484	0.898597	0.865092	0.883132	0.903518	0.950176	0.939832	0.954568	0.948768	0.944152	0.917147	0.970423	0.970548	0.957947	0.96024	0.962759	0.978039	0.975116	0.973343	0.9823	0.976315	0.987599	1	0.989759	0.988884	0.982425	0.976673	0.977103	0.964002	0.952625	0.948406	0.961615	0.949121	0.944008	0.936314	0.878373	0.923769	0.935261	0.909673	0.917098
SRR5412452	Bovismorbificans	B1	0.860363	0.877393	0.919187	0.936974	0.906943	0.892772	0.886402	0.877706	0.900817	0.867336	0.885402	0.905575	0.948606	0.93897	0.956178	0.947027	0.943336	0.918402	0.968958	0.968158	0.960003	0.961713	0.964595	0.976021	0.972803	0.973056	0.980948	0.973984	0.989902	0.989759	1	0.989403	0.979871	0.977901	0.978797	0.961975	0.950331	0.947357	0.959269	0.946617	0.945627	0.933948	0.879031	0.925349	0.935971	0.911514	0.919064
SRR5412500	Bovismorbificans	B1	0.858063	0.874571	0.917327	0.935272	0.904419	0.890434	0.884144	0.875488	0.898147	0.865106	0.882862	0.902838	0.946478	0.936858	0.954296	0.945095	0.941211	0.91728	0.967124	0.965983	0.957535	0.960716	0.963193	0.973725	0.970643	0.971004	0.97912	0.97241	0.987471	0.988884	0.989403	1	0.977884	0.976157	0.976909	0.959889	0.948287	0.945288	0.957249	0.94476	0.943428	0.932047	0.8771	0.923446	0.934108	0.909517	0.917254
SRR4099590	Bovismorbificans	B1	0.855761	0.875573	0.91695	0.935113	0.90206	0.887478	0.88093	0.872286	0.895345	0.861834	0.879739	0.900122	0.947283	0.936485	0.951357	0.945869	0.941226	0.914271	0.96685	0.967736	0.954909	0.95863	0.959219	0.974355	0.97154	0.976786	0.985415	0.979353	0.983598	0.982425	0.979871	0.977884	1	0.988361	0.967611	0.960994	0.951659	0.951281	0.958475	0.945555	0.946454	0.939434	0.875394	0.922702	0.927427	0.908316	0.916066
SRR3049817	Bovismorbificans	B1	0.852627	0.871942	0.912675	0.930088	0.898788	0.884799	0.878296	0.869687	0.893011	0.859624	0.877122	0.89727	0.941494	0.932079	0.949027	0.940677	0.936945	0.911859	0.962464	0.961057	0.952261	0.957129	0.957377	0.96834	0.965488	0.971942	0.980677	0.973572	0.98193	0.976673	0.977901	0.976157	0.988361	1	0.965964	0.955053	0.945835	0.946571	0.95235	0.940075	0.944114	0.933403	0.872663	0.92035	0.924079	0.906163	0.913989
SRR5412498	Bovismorbificans	B1	0.853385	0.869747	0.908154	0.925345	0.900288	0.886174	0.879927	0.870941	0.894331	0.860837	0.878191	0.898594	0.936481	0.926978	0.9445	0.935507	0.931803	0.90749	0.957423	0.955787	0.947548	0.95046	0.952835	0.963579	0.960455	0.960991	0.969019	0.962231	0.976501	0.977103	0.978797	0.976909	0.967611	0.965964	1	0.954152	0.93859	0.936114	0.947205	0.934909	0.934255	0.922695	0.868955	0.924916	0.928342	0.904257	0.911851
AZLC01	Bovismorbificans	B1	0.848403	0.87134	0.902992	0.929118	0.89334	0.878882	0.872606	0.863851	0.886565	0.853672	0.871141	0.891302	0.933046	0.921752	0.934131	0.928875	0.924977	0.903454	0.959658	0.962813	0.950628	0.958718	0.957234	0.956215	0.953457	0.952697	0.961312	0.954749	0.965636	0.964002	0.961975	0.959889	0.960994	0.955053	0.954152	1	0.943456	0.929258	0.942746	0.930148	0.925614	0.92516	0.862276	0.910313	0.916871	0.903255	0.90463
SRR6289950	Bovismorbificans	B1	0.844257	0.871459	0.903435	0.929242	0.889626	0.875223	0.86881	0.860224	0.88314	0.850048	0.867347	0.887428	0.935131	0.923398	0.923202	0.91849	0.914016	0.904845	0.961779	0.966894	0.954337	0.961737	0.941177	0.96081	0.951797	0.958752	0.952034	0.945829	0.953906	0.952625	0.950331	0.948287	0.951659	0.945835	0.93859	0.943456	1	0.934876	0.943616	0.930967	0.928855	0.93103	0.860196	0.916989	0.90258	0.911706	0.91039
SRR7471123	Bovismorbificans	B1	0.844334	0.863648	0.900739	0.919134	0.889078	0.876021	0.869173	0.861584	0.883232	0.855545	0.871997	0.888351	0.931003	0.921763	0.920553	0.915092	0.91132	0.900453	0.950873	0.949523	0.938327	0.942805	0.927657	0.956756	0.947464	0.96764	0.961386	0.954845	0.9508	0.948406	0.947357	0.945288	0.951281	0.946571	0.936114	0.929258	0.934876	1	0.93949	0.926795	0.932382	0.929965	0.857865	0.909365	0.901683	0.895548	0.90296
SRR3465358	Bovismorbificans	B1	0.850543	0.876211	0.910379	0.929255	0.896256	0.881905	0.875585	0.867015	0.889796	0.856793	0.874293	0.894295	0.941692	0.930945	0.931649	0.926183	0.922193	0.908752	0.960915	0.961412	0.948735	0.950572	0.939301	0.968546	0.961583	0.964111	0.958449	0.952713	0.962879	0.961615	0.959269	0.957249	0.958475	0.95235	0.947205	0.942746	0.943616	0.93949	1	0.980799	0.974663	0.927707	0.866523	0.914505	0.912922	0.900793	0.907967
SRR3465357	Bovismorbificans	B1	0.840074	0.865459	0.899119	0.917026	0.884878	0.870695	0.864472	0.85588	0.878792	0.845997	0.863079	0.882866	0.929149	0.9189	0.919697	0.914147	0.910297	0.897506	0.94803	0.94833	0.936499	0.938085	0.927331	0.955265	0.948532	0.951218	0.945612	0.939962	0.950291	0.949121	0.946617	0.94476	0.945555	0.940075	0.934909	0.930148	0.930967	0.926795	0.980799	1	0.962092	0.915705	0.856201	0.902753	0.901286	0.889511	0.896572
SRR5412525	Bovismorbificans	B1	0.84327	0.866033	0.895899	0.913383	0.883686	0.869737	0.863415	0.85489	0.877805	0.844916	0.861555	0.881513	0.924702	0.915495	0.937517	0.928409	0.925157	0.896218	0.943924	0.94311	0.93517	0.939558	0.926049	0.950072	0.943064	0.957138	0.950998	0.944442	0.948919	0.944008	0.945627	0.943428	0.946454	0.944114	0.934255	0.925614	0.928855	0.932382	0.974663	0.962092	1	0.937728	0.855122	0.904393	0.899697	0.891357	0.898887
SRR4099593	Bovismorbificans	B1	0.835609	0.853878	0.888508	0.912562	0.875335	0.861301	0.85508	0.846616	0.868689	0.836452	0.853261	0.873017	0.918422	0.907844	0.926776	0.921775	0.917394	0.889886	0.944456	0.946255	0.933903	0.938431	0.921737	0.944251	0.935532	0.954657	0.947602	0.942569	0.937351	0.936314	0.933948	0.932047	0.939434	0.933403	0.922695	0.92516	0.93103	0.929965	0.927707	0.915705	0.937728	1	0.846447	0.894759	0.8874	0.885194	0.888366
SRR1753647	Bovismorbificans	B1	0.790136	0.800293	0.941583	0.891967	0.824656	0.81182	0.805935	0.797762	0.820072	0.789449	0.803678	0.822328	0.911848	0.903353	0.89269	0.885722	0.883535	0.88425	0.874544	0.874183	0.866592	0.868618	0.862908	0.880587	0.877457	0.878337	0.876263	0.870211	0.881467	0.878373	0.879031	0.8771	0.875394	0.872663	0.868955	0.862276	0.860196	0.857865	0.866523	0.856201	0.855122	0.846447	1	0.840249	0.840847	0.828507	0.834503
SRR1958666	Bovismorbificans	B1	0.864011	0.874286	0.879924	0.898454	0.89879	0.884828	0.878408	0.86968	0.895946	0.862374	0.880008	0.900527	0.908164	0.911921	0.898818	0.890645	0.887124	0.880558	0.924871	0.924594	0.916206	0.92613	0.907218	0.931814	0.922373	0.93174	0.923768	0.917518	0.928483	0.923769	0.925349	0.923446	0.922702	0.92035	0.924916	0.910313	0.916989	0.909365	0.914505	0.902753	0.904393	0.894759	0.840249	1	0.936407	0.939572	0.945831
SRR4427089	Bovismorbificans	B1	0.862985	0.862842	0.876839	0.893704	0.90098	0.886704	0.880605	0.871428	0.900055	0.866768	0.884879	0.905426	0.903583	0.915549	0.904556	0.896328	0.893032	0.875819	0.919331	0.919715	0.910901	0.912645	0.913326	0.927262	0.925619	0.924046	0.927593	0.921694	0.934905	0.935261	0.935971	0.934108	0.927427	0.924079	0.928342	0.916871	0.90258	0.901683	0.912922	0.901286	0.899697	0.8874	0.840847	0.936407	1	0.923493	0.931271
SRR1645882	Bovismorbificans	B1	0.852196	0.863725	0.867416	0.89266	0.892344	0.87877	0.872261	0.863639	0.889211	0.856055	0.873493	0.893923	0.89504	0.904566	0.885647	0.877278	0.874279	0.87063	0.917528	0.917354	0.910031	0.918318	0.900489	0.917599	0.908296	0.917607	0.909524	0.903192	0.915156	0.909673	0.911514	0.909517	0.908316	0.906163	0.904257	0.903255	0.911706	0.895548	0.900793	0.889511	0.891357	0.885194	0.828507	0.939572	0.923493	1	0.981052
SRR3048917	Bovismorbificans	B1	0.858926	0.869535	0.874162	0.893174	0.899664	0.886194	0.879717	0.871103	0.89643	0.863376	0.880995	0.901745	0.902343	0.911772	0.892735	0.884113	0.881003	0.875406	0.918344	0.918071	0.910744	0.920666	0.902059	0.925129	0.915678	0.925574	0.91712	0.910726	0.922789	0.917098	0.919064	0.917254	0.916066	0.913989	0.911851	0.90463	0.91039	0.90296	0.907967	0.896572	0.898887	0.888366	0.834503	0.945831	0.931271	0.981052	1
SRR5412408	Bovismorbificans	B1	0.847362	0.857752	0.862541	0.881565	0.887016	0.873637	0.867319	0.858781	0.884323	0.851284	0.868455	0.888576	0.889702	0.899116	0.880504	0.872093	0.868981	0.867562	0.906698	0.906303	0.898961	0.90844	0.890709	0.912174	0.902926	0.912338	0.904251	0.89793	0.909718	0.904266	0.905961	0.90462	0.902995	0.901452	0.899152	0.893094	0.899018	0.890155	0.895456	0.88443	0.885862	0.877646	0.823351	0.933337	0.917908	0.968747	0.974563
SRR3049289	Bovismorbificans	B1	0.84455	0.857906	0.870098	0.887658	0.884188	0.870685	0.864349	0.855814	0.879363	0.846814	0.863838	0.883789	0.897907	0.907225	0.906762	0.898913	0.895312	0.870852	0.913828	0.913485	0.905848	0.917216	0.896846	0.920428	0.911323	0.92051	0.9127	0.906356	0.917175	0.912586	0.913657	0.911646	0.912018	0.909132	0.906402	0.900416	0.907687	0.89818	0.903768	0.892433	0.911386	0.903063	0.831026	0.922495	0.907144	0.940319	0.949107
SRR5412411	Bovismorbificans	B1	0.831357	0.834271	0.846311	0.863966	0.869827	0.85692	0.850618	0.842333	0.866931	0.834949	0.851601	0.871378	0.872748	0.881565	0.864204	0.855458	0.8526	0.850314	0.887972	0.88762	0.880912	0.882716	0.872501	0.894307	0.885303	0.892176	0.88444	0.878438	0.891996	0.886603	0.888347	0.886978	0.883557	0.8817	0.881716	0.874866	0.87179	0.871154	0.878113	0.867405	0.866622	0.857828	0.808298	0.899426	0.899805	0.932211	0.940149
SRR7469068	Bovismorbificans	B1	0.849352	0.861894	0.862447	0.889345	0.895461	0.881002	0.874902	0.865977	0.89307	0.860232	0.877555	0.897772	0.888556	0.895539	0.892812	0.885198	0.88184	0.864261	0.914389	0.918792	0.910575	0.910905	0.919717	0.910483	0.907308	0.908251	0.915516	0.908939	0.922214	0.917811	0.918839	0.916995	0.914582	0.911706	0.911325	0.920236	0.899141	0.886816	0.895214	0.884049	0.882861	0.878917	0.826076	0.903334	0.916231	0.916206	0.917515
SRR5412485	Bovismorbificans	B1	0.842768	0.854946	0.855232	0.882152	0.888028	0.873986	0.868075	0.859295	0.886079	0.853578	0.870539	0.890577	0.880997	0.887751	0.885772	0.877429	0.874356	0.857629	0.906216	0.910811	0.903206	0.903776	0.912515	0.90259	0.899637	0.900324	0.907368	0.901446	0.914828	0.909935	0.91152	0.909826	0.906598	0.904431	0.904069	0.912215	0.891372	0.878855	0.887656	0.876527	0.875907	0.871623	0.819864	0.896244	0.90806	0.912429	0.913782
SRR1346250	Bovismorbificans	B1	0.831452	0.837841	0.856326	0.88285	0.870725	0.85677	0.85073	0.841949	0.866996	0.834419	0.851468	0.871366	0.883101	0.891989	0.876085	0.868696	0.865402	0.859058	0.909578	0.914768	0.905963	0.909257	0.899404	0.906705	0.899965	0.904381	0.898074	0.892481	0.904278	0.90086	0.901059	0.898981	0.897642	0.894158	0.893944	0.904363	0.894108	0.882594	0.905337	0.8941	0.89188	0.876523	0.817832	0.892038	0.897739	0.893939	0.894711
SRR5412453	Bovismorbificans	B1	0.829667	0.855213	0.861559	0.895485	0.873559	0.860098	0.854057	0.845117	0.868274	0.835743	0.852363	0.872332	0.887881	0.881705	0.880484	0.872506	0.869232	0.863991	0.914535	0.912909	0.905225	0.912498	0.897752	0.910592	0.903455	0.910749	0.904556	0.898469	0.90889	0.904132	0.905532	0.903614	0.903725	0.901258	0.896679	0.897144	0.90072	0.887669	0.908368	0.897252	0.898809	0.881286	0.824474	0.888281	0.879241	0.884749	0.886003
SRR3606557	Bovismorbificans	B1	0.821171	0.844187	0.853287	0.8693	0.864403	0.850645	0.844857	0.836146	0.858824	0.827075	0.843617	0.862964	0.880199	0.873214	0.870511	0.864528	0.860829	0.851827	0.895713	0.895858	0.885895	0.895187	0.878853	0.90269	0.895767	0.901902	0.896282	0.891103	0.898633	0.896063	0.895448	0.893637	0.895859	0.893023	0.887138	0.881538	0.886002	0.879153	0.900492	0.889651	0.888666	0.868047	0.815573	0.878842	0.870347	0.868348	0.876091
SRR1967442	Bovismorbificans	B1	0.864884	0.875848	0.871864	0.89019	0.908904	0.894111	0.887948	0.878952	0.90858	0.874427	0.893069	0.913551	0.899579	0.897361	0.891144	0.882952	0.879424	0.871643	0.917431	0.91707	0.90872	0.910643	0.898336	0.923923	0.914777	0.921572	0.913635	0.907225	0.920519	0.916995	0.919214	0.916421	0.912667	0.910264	0.909381	0.901219	0.90005	0.899737	0.906822	0.895332	0.893992	0.885188	0.83243	0.910181	0.908868	0.895939	0.902805
SRR1965639	Bovismorbificans	B1	0.843764	0.853686	0.853446	0.870779	0.882251	0.868698	0.86253	0.853903	0.88024	0.847737	0.865167	0.884954	0.879787	0.877096	0.868024	0.860265	0.857164	0.853104	0.893282	0.892876	0.884964	0.887254	0.877041	0.900035	0.890829	0.897399	0.88966	0.883605	0.896333	0.893011	0.89511	0.893018	0.888693	0.887307	0.887523	0.881042	0.876719	0.876358	0.883207	0.872232	0.871147	0.862356	0.815737	0.890207	0.886755	0.876608	0.88333
SRR7369925	Bovismorbificans	B1	0.852073	0.854343	0.851261	0.866403	0.884581	0.870005	0.864124	0.855409	0.879356	0.846737	0.863469	0.883478	0.876411	0.875389	0.875807	0.868916	0.865498	0.849516	0.892445	0.892497	0.883838	0.885215	0.878812	0.898908	0.898727	0.896403	0.894179	0.888301	0.900255	0.897651	0.898716	0.896267	0.893764	0.890364	0.890567	0.884321	0.876624	0.878314	0.884547	0.873479	0.875786	0.866008	0.817005	0.887462	0.891395	0.876764	0.883591
SRR1967641	Bovismorbificans	B1	0.86607	0.920932	0.875166	0.893134	0.959771	0.94451	0.937537	0.927908	0.953654	0.916613	0.933523	0.955948	0.903953	0.903253	0.891601	0.885543	0.879724	0.876398	0.9178	0.9174	0.909412	0.911018	0.900436	0.924612	0.915097	0.921924	0.913919	0.907434	0.921048	0.91628	0.918657	0.91585	0.913028	0.910406	0.911714	0.90425	0.90057	0.901054	0.90721	0.895589	0.894539	0.885361	0.834636	0.911779	0.906142	0.898196	0.905238
SRR5412438	Bovismorbificans	B1	0.860767	0.913012	0.868201	0.88438	0.958272	0.943501	0.936487	0.92722	0.950727	0.913775	0.932807	0.955039	0.894729	0.901292	0.888075	0.879759	0.876428	0.867846	0.908787	0.908182	0.900493	0.902376	0.897817	0.915259	0.912532	0.912714	0.910734	0.904295	0.918304	0.912982	0.915627	0.913275	0.909735	0.907751	0.908969	0.900902	0.891397	0.891575	0.89957	0.888161	0.887353	0.876558	0.831628	0.903294	0.916378	0.896902	0.904388
SRR7257407	Bovismorbificans	B1	0.855404	0.917753	0.862499	0.878544	0.953842	0.938237	0.931068	0.921614	0.944672	0.907793	0.927211	0.949459	0.889048	0.895418	0.882241	0.875381	0.871833	0.861545	0.902972	0.902441	0.893862	0.902673	0.891262	0.909377	0.906986	0.908615	0.907126	0.900564	0.911542	0.907651	0.909107	0.906363	0.9063	0.903073	0.902639	0.895618	0.893159	0.888093	0.894151	0.882885	0.883546	0.87294	0.825735	0.903931	0.907082	0.897405	0.905758
SRR1970289	Bovismorbificans	B1	0.862305	0.926921	0.867676	0.885606	0.96209	0.946895	0.93985	0.930169	0.953448	0.916335	0.935815	0.95853	0.896076	0.902356	0.883773	0.875541	0.872453	0.86871	0.909963	0.909334	0.901413	0.903428	0.892999	0.916508	0.90697	0.913848	0.906039	0.899558	0.913301	0.908405	0.910847	0.908353	0.905038	0.903097	0.903981	0.897756	0.892576	0.892841	0.904151	0.892572	0.891693	0.877627	0.827569	0.905271	0.906884	0.89867	0.905796
SRR1118698	Bovismorbificans	B1	0.856941	0.921359	0.863394	0.879866	0.955318	0.940212	0.933103	0.923645	0.946902	0.909793	0.929252	0.951713	0.890271	0.896495	0.882486	0.874225	0.871073	0.863201	0.903818	0.903405	0.89564	0.897311	0.891381	0.910428	0.905917	0.908004	0.904396	0.897834	0.91181	0.906858	0.909375	0.906469	0.903571	0.901001	0.902624	0.896316	0.88682	0.886998	0.902043	0.89071	0.889643	0.872008	0.825997	0.899023	0.906457	0.892947	0.899833
ERR230433	Bovismorbificans	B1	0.848299	0.920885	0.856425	0.873905	0.945419	0.930499	0.923622	0.914268	0.93742	0.900568	0.919443	0.941615	0.881411	0.887514	0.874812	0.866839	0.863703	0.856941	0.89809	0.897348	0.889837	0.8914	0.886398	0.901173	0.900906	0.899075	0.896575	0.890065	0.903631	0.898673	0.901142	0.898495	0.895571	0.893304	0.894628	0.891146	0.880757	0.878423	0.891087	0.879939	0.87909	0.866912	0.820645	0.88973	0.898919	0.885125	0.890471
SRR1965978	Bovismorbificans	B1	0.854126	0.919606	0.8601	0.87869	0.952433	0.937831	0.930941	0.921649	0.944428	0.90827	0.92713	0.949212	0.887956	0.894167	0.875953	0.867615	0.86456	0.862216	0.902464	0.903009	0.89532	0.897198	0.886769	0.907793	0.898421	0.905403	0.897469	0.891228	0.904849	0.899774	0.902359	0.899768	0.896522	0.894289	0.895662	0.891979	0.886693	0.884738	0.899007	0.887583	0.886706	0.870651	0.820736	0.896823	0.898369	0.893846	0.897488
SRR1645426	Bovismorbificans	B1	0.85393	0.910126	0.860796	0.882611	0.952159	0.93675	0.929608	0.92017	0.943587	0.906247	0.925627	0.947931	0.88748	0.893744	0.879851	0.872012	0.868644	0.862311	0.908845	0.908134	0.900309	0.90345	0.895276	0.907649	0.903493	0.905034	0.901941	0.89567	0.908716	0.904553	0.9063	0.903687	0.901152	0.898391	0.899864	0.901522	0.890368	0.884278	0.89672	0.885477	0.884373	0.875615	0.823758	0.896121	0.904901	0.900667	0.896597
SRR7359583	Bovismorbificans	B1	0.856391	0.918484	0.863803	0.886528	0.95236	0.936648	0.929449	0.920076	0.946139	0.908916	0.928348	0.950602	0.891587	0.896408	0.878998	0.871995	0.868591	0.86597	0.912761	0.911384	0.902527	0.91244	0.893504	0.912122	0.902773	0.911692	0.904096	0.897582	0.907642	0.904239	0.905427	0.902661	0.902847	0.89956	0.899108	0.898471	0.901794	0.891091	0.895053	0.88368	0.885651	0.880267	0.823815	0.905778	0.900172	0.909802	0.908386
CGIA01	Bovismorbificans	B1	0.85334	0.915616	0.858914	0.876759	0.963673	0.96167	0.955441	0.94705	0.941908	0.920876	0.939492	0.958779	0.887292	0.892	0.874863	0.866891	0.863549	0.85997	0.900051	0.899802	0.891931	0.901766	0.883669	0.906928	0.897762	0.90709	0.898703	0.892519	0.903885	0.899014	0.901333	0.898813	0.897772	0.895095	0.894699	0.88704	0.890799	0.885475	0.889946	0.878642	0.881448	0.871375	0.819691	0.900735	0.894787	0.894253	0.903444
SRR3721474	Bovismorbificans	B1	0.85099	0.908294	0.85637	0.871884	0.946249	0.930659	0.923644	0.914188	0.94878	0.911294	0.919558	0.941852	0.882717	0.888827	0.87507	0.87735	0.864502	0.855271	0.895539	0.895815	0.886971	0.88847	0.883881	0.902444	0.902575	0.89962	0.897421	0.891549	0.903726	0.900286	0.901439	0.898667	0.897244	0.893756	0.894781	0.888452	0.87973	0.879005	0.900503	0.889172	0.887323	0.864948	0.819883	0.889891	0.903419	0.883361	0.890532
SRR5412517	Bovismorbificans	B1	0.857805	0.907441	0.863317	0.880901	0.951549	0.9362	0.929242	0.919576	0.945668	0.908598	0.927809	0.95009	0.891197	0.897258	0.879037	0.871097	0.867678	0.870028	0.904911	0.904653	0.896799	0.898213	0.887826	0.911739	0.902258	0.908996	0.901	0.894668	0.908039	0.90355	0.905915	0.902884	0.900272	0.897517	0.899087	0.891564	0.888045	0.887967	0.894559	0.883225	0.882144	0.873223	0.823182	0.899485	0.901166	0.893083	0.900379
MYFY01	Bovismorbificans	B1	0.871903	0.920252	0.874368	0.892501	0.966643	0.950456	0.943272	0.933608	0.976334	0.937875	0.958294	0.981384	0.902897	0.911518	0.890109	0.88235	0.878895	0.874329	0.916858	0.916809	0.907987	0.909502	0.898986	0.92402	0.914365	0.921353	0.912853	0.906581	0.91987	0.915875	0.917074	0.914262	0.912386	0.908879	0.9103	0.903379	0.899672	0.899953	0.906475	0.894969	0.893074	0.884813	0.832825	0.911939	0.917248	0.905138	0.912661
SRR5412530	Bovismorbificans	B1	0.867524	0.913242	0.867877	0.885847	0.959109	0.943239	0.936223	0.926592	0.9855	0.946266	0.951497	0.97428	0.895983	0.904496	0.884163	0.890172	0.872664	0.868477	0.909922	0.909622	0.9019	0.903048	0.893016	0.916729	0.907438	0.91414	0.906179	0.899744	0.913701	0.908858	0.910986	0.908018	0.905518	0.90296	0.90408	0.89659	0.893045	0.893312	0.899572	0.888227	0.887269	0.878154	0.827348	0.905656	0.910208	0.899129	0.906347
SRR1965805	Bovismorbificans	B1	0.868486	0.920101	0.871155	0.889796	0.964845	0.949923	0.943378	0.933911	0.960253	0.923508	0.943527	0.966123	0.899882	0.908561	0.887666	0.879132	0.875793	0.872071	0.913633	0.913151	0.905366	0.907645	0.89659	0.920327	0.910682	0.918016	0.909755	0.903601	0.917429	0.91217	0.914625	0.912346	0.908851	0.906466	0.906506	0.900781	0.89611	0.896997	0.90298	0.891494	0.890327	0.881358	0.830686	0.910301	0.914617	0.904266	0.911991
SRR7275021	Bovismorbificans	B1	0.863643	0.915064	0.869758	0.887369	0.952817	0.937533	0.930403	0.920932	0.959563	0.922114	0.939146	0.961617	0.897809	0.899215	0.884953	0.880735	0.874694	0.869547	0.91187	0.911369	0.90239	0.903713	0.893444	0.91847	0.909022	0.9156	0.907935	0.901405	0.914149	0.910397	0.911509	0.908577	0.907078	0.903622	0.904695	0.898204	0.894587	0.895397	0.901313	0.88997	0.887977	0.880122	0.828936	0.904811	0.903211	0.891659	0.898764
SRR4243069	Bovismorbificans	B1	0.859946	0.908766	0.862774	0.880283	0.953616	0.938142	0.931056	0.921421	0.954625	0.917234	0.936954	0.959537	0.890808	0.898825	0.8783	0.870827	0.867544	0.863056	0.904305	0.904284	0.89581	0.897224	0.887102	0.91127	0.901789	0.908366	0.900414	0.894393	0.907019	0.903342	0.90455	0.901944	0.900002	0.896842	0.897725	0.891174	0.887704	0.887683	0.894236	0.882968	0.88113	0.873276	0.822643	0.89918	0.901527	0.894091	0.90119
SRR5412405	Bovismorbificans	B1	0.863799	0.911841	0.867315	0.884192	0.957441	0.941697	0.934624	0.924928	0.98034	0.941386	0.948915	0.971724	0.895503	0.903734	0.882319	0.874742	0.870941	0.867806	0.908121	0.90788	0.899971	0.901251	0.891157	0.914932	0.905808	0.912254	0.904277	0.8979	0.911617	0.906973	0.908959	0.906195	0.903617	0.900945	0.902205	0.894679	0.891215	0.891475	0.897958	0.886743	0.88541	0.876471	0.826808	0.903703	0.908401	0.897063	0.904438
SRR6704096	Bovismorbificans	B1	0.850804	0.898589	0.854524	0.871125	0.94246	0.926693	0.919726	0.910528	0.966893	0.929654	0.93398	0.956642	0.882033	0.890362	0.868714	0.861936	0.858157	0.85473	0.89457	0.894325	0.885811	0.887189	0.877144	0.901263	0.892379	0.898547	0.890734	0.884865	0.896962	0.893509	0.894449	0.891674	0.890198	0.886709	0.887967	0.881504	0.878206	0.880005	0.884669	0.87361	0.871865	0.863684	0.81466	0.890242	0.89476	0.883135	0.890068
SRR7442252	Bovismorbificans	B1	0.850681	0.898764	0.854436	0.870425	0.941896	0.925897	0.91899	0.909639	0.966214	0.928343	0.93279	0.955121	0.881871	0.889962	0.868303	0.861853	0.858987	0.854387	0.894169	0.894121	0.88542	0.886768	0.876837	0.900897	0.892041	0.898077	0.890419	0.884406	0.896557	0.893289	0.893965	0.89134	0.889903	0.886412	0.887589	0.881502	0.878014	0.87842	0.884896	0.874059	0.872073	0.863601	0.81467	0.888994	0.894059	0.882526	0.889491
SRR6143716	Bovismorbificans	B1	0.862922	0.927134	0.865678	0.883224	0.956288	0.939992	0.932891	0.923579	0.965576	0.928366	0.948085	0.970322	0.893773	0.902309	0.881197	0.874099	0.870622	0.865857	0.907524	0.907732	0.898496	0.91552	0.889879	0.914639	0.905308	0.913786	0.906039	0.900201	0.910196	0.907009	0.907603	0.904797	0.905625	0.901814	0.901203	0.894591	0.898061	0.893896	0.897419	0.886078	0.886546	0.878293	0.825276	0.910106	0.907938	0.903068	0.911155
SRR4011088	Bovismorbificans	B1	0.85629	0.919718	0.860144	0.876366	0.948614	0.93248	0.925592	0.916132	0.971146	0.932647	0.939711	0.962128	0.887889	0.896356	0.87441	0.868263	0.863936	0.860207	0.900219	0.900489	0.891384	0.90832	0.883015	0.907293	0.898298	0.906451	0.898821	0.892954	0.902966	0.899749	0.90045	0.897629	0.898353	0.894687	0.894053	0.887449	0.890907	0.885867	0.890629	0.879439	0.879956	0.871663	0.820297	0.902828	0.900662	0.895885	0.903867
SRR6681177	Bovismorbificans	B1	0.852701	0.915549	0.856454	0.872306	0.94412	0.928178	0.921161	0.911743	0.968635	0.93018	0.935066	0.957506	0.883885	0.891963	0.870543	0.86398	0.860226	0.856389	0.89621	0.89613	0.887411	0.904086	0.879038	0.902994	0.89404	0.902247	0.894768	0.888704	0.898789	0.895483	0.896279	0.893622	0.894125	0.890572	0.890054	0.883414	0.88682	0.881999	0.886415	0.875412	0.876135	0.867551	0.817067	0.898686	0.896393	0.891983	0.899796
SRR1686545	Bovismorbificans	B1	0.853896	0.908843	0.857552	0.873683	0.945777	0.930274	0.923427	0.913954	0.967908	0.92918	0.937132	0.959592	0.884806	0.892993	0.872662	0.864856	0.861267	0.858044	0.897149	0.896951	0.889157	0.899029	0.881187	0.903863	0.894909	0.903814	0.896226	0.89004	0.901334	0.896452	0.898566	0.895908	0.895504	0.893078	0.892233	0.884495	0.888533	0.883181	0.887332	0.876339	0.877982	0.868661	0.818697	0.901237	0.897897	0.894432	0.902316
SRR3049093	Bovismorbificans	B1	0.858292	0.905621	0.86825	0.878477	0.951232	0.936019	0.929139	0.919665	0.974475	0.936708	0.943341	0.965736	0.896809	0.904718	0.877038	0.86921	0.865084	0.86909	0.901897	0.901492	0.893962	0.895761	0.885662	0.908517	0.899546	0.906059	0.898107	0.891881	0.905737	0.90063	0.903059	0.90045	0.897273	0.895045	0.896535	0.888612	0.885034	0.885362	0.891865	0.880623	0.879678	0.870567	0.828043	0.898158	0.902881	0.891494	0.89891
SRR7410277	Bovismorbificans	B1	0.85453	0.901705	0.864652	0.874438	0.945434	0.9306	0.92341	0.914734	0.968055	0.934541	0.940006	0.95962	0.892673	0.901234	0.872235	0.865903	0.861723	0.865582	0.89846	0.897991	0.889386	0.891061	0.880702	0.904856	0.895887	0.902244	0.894575	0.888959	0.90069	0.897091	0.898187	0.895534	0.893688	0.890419	0.891566	0.885112	0.8817	0.893104	0.888251	0.877039	0.875306	0.867	0.824048	0.893362	0.89873	0.886812	0.893852
SRR7506891	Bovismorbificans	B1	0.855577	0.903132	0.859361	0.875575	0.947685	0.931808	0.92472	0.915258	0.970127	0.931797	0.938792	0.961165	0.886932	0.895301	0.873307	0.867465	0.863172	0.859227	0.899597	0.899371	0.890618	0.891999	0.881948	0.906136	0.897268	0.903396	0.895872	0.889579	0.901826	0.898442	0.899274	0.896544	0.895137	0.891669	0.8928	0.88633	0.88305	0.883206	0.889666	0.878517	0.87664	0.868556	0.819202	0.894444	0.899333	0.887857	0.894891
SRR5412456	Bovismorbificans	B1	0.855799	0.918873	0.859655	0.876095	0.948208	0.932746	0.92578	0.916315	0.971727	0.933051	0.9399	0.962172	0.887159	0.895508	0.874557	0.867405	0.863513	0.860335	0.899734	0.899414	0.89184	0.893342	0.883535	0.906424	0.897594	0.903746	0.896078	0.889833	0.903458	0.898646	0.90087	0.898102	0.89523	0.892993	0.894202	0.888656	0.883152	0.883311	0.897988	0.886832	0.885799	0.868625	0.819878	0.895541	0.899871	0.889181	0.896353
SRR7415103	Bovismorbificans	B1	0.852671	0.905439	0.856388	0.87269	0.94441	0.928732	0.921767	0.912335	0.97389	0.93557	0.935712	0.958007	0.884049	0.892113	0.870654	0.864642	0.860908	0.856565	0.896484	0.896184	0.887688	0.88919	0.879083	0.902917	0.894073	0.900279	0.892684	0.886497	0.899038	0.89528	0.896451	0.893728	0.89199	0.888942	0.889892	0.885171	0.879999	0.880092	0.89253	0.881299	0.879567	0.865613	0.816722	0.891509	0.896369	0.885027	0.892244
SRR5412444	Bovismorbificans	B1	0.848095	0.894709	0.85827	0.86782	0.93913	0.923915	0.917339	0.907979	0.962284	0.924244	0.930746	0.953021	0.885821	0.893903	0.866708	0.859181	0.855023	0.859168	0.891086	0.890735	0.883223	0.885321	0.875108	0.897629	0.888827	0.895128	0.887359	0.881416	0.894731	0.889798	0.892117	0.889742	0.886521	0.884635	0.88608	0.878037	0.874577	0.874809	0.881291	0.870406	0.86938	0.860515	0.818982	0.887274	0.891771	0.880574	0.887731
SRR5412389	Bovismorbificans	B1	0.858994	0.904389	0.860504	0.877163	0.94937	0.933951	0.927179	0.91768	0.975003	0.936653	0.941241	0.963636	0.887158	0.895168	0.882347	0.887778	0.870374	0.860406	0.900562	0.900312	0.892911	0.894706	0.891399	0.907353	0.904172	0.904756	0.903658	0.897653	0.911537	0.906236	0.908807	0.906201	0.903154	0.900669	0.902235	0.89415	0.883965	0.884071	0.892309	0.881141	0.880444	0.869517	0.8243	0.896837	0.910024	0.889798	0.897442
SRR5412451	Bovismorbificans	B1	0.85371	0.91421	0.855991	0.872038	0.943402	0.927861	0.920972	0.911434	0.96675	0.928094	0.934844	0.957242	0.882005	0.890076	0.877105	0.881259	0.86571	0.855432	0.895387	0.895068	0.887654	0.904367	0.885684	0.902007	0.898941	0.901584	0.90067	0.894296	0.905833	0.901089	0.903257	0.900377	0.899788	0.897314	0.896916	0.889058	0.885869	0.881078	0.887189	0.87619	0.877907	0.866669	0.820426	0.898746	0.904591	0.892019	0.900046
SRR1966561	Bovismorbificans	B1	0.85306	0.906433	0.855215	0.871263	0.942641	0.927055	0.920382	0.910788	0.965605	0.927355	0.934118	0.956475	0.88151	0.889211	0.876497	0.880538	0.865153	0.854738	0.894604	0.894413	0.88678	0.896601	0.8849	0.901198	0.898066	0.901165	0.900237	0.894207	0.904824	0.900409	0.902358	0.899727	0.899546	0.896821	0.89605	0.888292	0.885646	0.880701	0.886455	0.87533	0.877407	0.866373	0.820225	0.898791	0.903848	0.891743	0.900553
SRR1969958	Bovismorbificans	B1	0.858579	0.903823	0.860018	0.876498	0.948874	0.93356	0.926715	0.91711	0.986841	0.947504	0.942081	0.964634	0.887647	0.895843	0.87489	0.880487	0.86359	0.860734	0.900067	0.899699	0.892096	0.893705	0.883396	0.906691	0.897748	0.904354	0.896472	0.890227	0.903476	0.899007	0.900993	0.898268	0.89569	0.893315	0.894395	0.886989	0.883543	0.883707	0.890231	0.879008	0.878014	0.869019	0.820676	0.896547	0.900422	0.889886	0.897026
SRR2168394	Bovismorbificans	B1	0.850857	0.895604	0.852165	0.868577	0.939634	0.924401	0.917665	0.908094	0.976864	0.938191	0.932454	0.954913	0.87945	0.887336	0.867266	0.872466	0.855738	0.853176	0.891647	0.891334	0.88374	0.88542	0.875455	0.898211	0.889349	0.895842	0.88804	0.882002	0.895198	0.890574	0.892307	0.889705	0.887358	0.884773	0.886445	0.878828	0.875386	0.875419	0.881867	0.870924	0.870145	0.861089	0.813217	0.887561	0.892026	0.881054	0.888251
SRR5412481	Bovismorbificans	B1	0.85119	0.896425	0.852638	0.868676	0.940074	0.924619	0.917885	0.908239	0.977893	0.938345	0.932826	0.955184	0.879824	0.887921	0.867451	0.873041	0.857132	0.853353	0.89203	0.891783	0.884062	0.885908	0.875896	0.898636	0.889889	0.896221	0.888471	0.882324	0.895671	0.891098	0.893017	0.890484	0.887833	0.88538	0.886704	0.879444	0.875874	0.875802	0.882851	0.871953	0.8709	0.861593	0.813761	0.887998	0.892292	0.881483	0.888641
SRR1968983	Bovismorbificans	B1	0.847812	0.89294	0.849511	0.865437	0.936287	0.921147	0.914265	0.904913	0.973656	0.934677	0.929221	0.951402	0.87636	0.884444	0.864069	0.869622	0.854026	0.850183	0.888809	0.888268	0.880614	0.883025	0.872583	0.895071	0.886333	0.892591	0.885314	0.879487	0.891987	0.887505	0.889346	0.887224	0.884341	0.883181	0.883164	0.876085	0.872498	0.872557	0.879369	0.868498	0.86768	0.858281	0.811178	0.88571	0.888785	0.878731	0.885321
SRR7475359	Bovismorbificans	B1	0.852785	0.898443	0.855782	0.870792	0.942314	0.926587	0.919631	0.910122	0.984565	0.944983	0.933201	0.955583	0.882205	0.890103	0.875453	0.880524	0.865001	0.854856	0.894551	0.894223	0.885924	0.887344	0.88403	0.900942	0.898138	0.898348	0.89752	0.891194	0.903799	0.9001	0.901308	0.898532	0.89689	0.893695	0.894922	0.887988	0.878233	0.878228	0.886466	0.875447	0.874183	0.863781	0.819514	0.889677	0.903369	0.883075	0.890234
SRR5412496	Bovismorbificans	B1	0.851314	0.899592	0.852874	0.868964	0.940215	0.924793	0.918042	0.908532	0.981807	0.942606	0.931421	0.953766	0.88005	0.888007	0.867908	0.873634	0.85661	0.853529	0.892204	0.89205	0.884512	0.889453	0.876387	0.898862	0.890033	0.906279	0.898636	0.892347	0.896101	0.891427	0.893503	0.890666	0.893604	0.891092	0.887198	0.879583	0.877655	0.88513	0.882545	0.871534	0.878449	0.87113	0.814148	0.890008	0.892666	0.883364	0.89073
SRR5412406	Bovismorbificans	B1	0.867394	0.923641	0.873004	0.890855	0.98023	0.964208	0.957045	0.947374	0.959131	0.92134	0.940813	0.963309	0.90175	0.906927	0.889867	0.881363	0.877936	0.874121	0.915484	0.915216	0.907287	0.908574	0.898382	0.922432	0.913132	0.919713	0.911533	0.905221	0.919152	0.914108	0.916515	0.913701	0.910776	0.907998	0.909478	0.901864	0.89821	0.897832	0.904875	0.893532	0.893269	0.883514	0.832147	0.907815	0.909804	0.90151	0.908659
SRR7187926	Bovismorbificans	B1	0.862166	0.917922	0.867864	0.885415	0.974165	0.958171	0.950743	0.941362	0.95158	0.914424	0.933899	0.956275	0.896103	0.901316	0.883364	0.876438	0.873089	0.868279	0.90996	0.909526	0.900722	0.902343	0.89205	0.916582	0.90738	0.913861	0.906028	0.89949	0.912185	0.908526	0.909731	0.907144	0.905289	0.901867	0.903046	0.89642	0.892812	0.892585	0.899418	0.888028	0.886577	0.87831	0.827172	0.901284	0.903667	0.895051	0.902159
SRR2168409	Bovismorbificans	B1	0.852152	0.907361	0.858256	0.875088	0.984797	0.968809	0.961059	0.951334	0.940774	0.903792	0.922721	0.944912	0.885824	0.890807	0.873806	0.866239	0.862854	0.858782	0.899157	0.898771	0.890733	0.892233	0.882068	0.905648	0.896657	0.903037	0.895377	0.889043	0.901983	0.897754	0.89962	0.897025	0.894672	0.89186	0.893066	0.885918	0.882461	0.881875	0.889004	0.877864	0.876842	0.868303	0.81855	0.891197	0.893062	0.885433	0.892288
SRR1959391	Bovismorbificans	B1	0.847176	0.901617	0.853107	0.869737	0.978482	0.962709	0.955258	0.94547	0.935127	0.898306	0.917001	0.939087	0.880398	0.885404	0.868706	0.861085	0.857754	0.854015	0.893689	0.89312	0.88539	0.887341	0.877321	0.899985	0.891139	0.897475	0.889966	0.883737	0.896661	0.892216	0.894337	0.891787	0.888952	0.887535	0.888059	0.880486	0.877065	0.876514	0.883489	0.872589	0.871772	0.862957	0.814629	0.886818	0.88782	0.880929	0.887249
SRR5412400	Bovismorbificans	B1	0.862003	0.915252	0.867959	0.88585	0.985913	0.969758	0.962136	0.952325	0.952433	0.915099	0.93445	0.95675	0.896159	0.902765	0.884037	0.875845	0.872438	0.868823	0.910091	0.90976	0.901972	0.903443	0.893034	0.916931	0.907574	0.914207	0.90608	0.899757	0.913425	0.90877	0.911125	0.908344	0.905436	0.902634	0.904161	0.896614	0.892837	0.893034	0.899652	0.888306	0.887366	0.877962	0.827412	0.90419	0.906244	0.898091	0.905367
SRR7439483	Bovismorbificans	B1	0.854569	0.908931	0.860361	0.877837	0.986677	0.970336	0.96292	0.953181	0.942006	0.905798	0.924899	0.946792	0.888622	0.893209	0.876174	0.868739	0.865522	0.860971	0.901791	0.901452	0.893081	0.894661	0.884574	0.908355	0.899264	0.905643	0.897885	0.891521	0.904435	0.90043	0.902039	0.899296	0.897228	0.894015	0.89556	0.888519	0.885061	0.884411	0.891502	0.880226	0.878993	0.870888	0.820417	0.8934	0.895728	0.887128	0.894509
SRR7523830	Bovismorbificans	B1	0.852453	0.907741	0.858318	0.875448	0.985058	0.969035	0.961406	0.951441	0.94078	0.903999	0.922796	0.944839	0.886109	0.890999	0.87371	0.866752	0.863331	0.859043	0.899551	0.89912	0.890713	0.892222	0.882065	0.905923	0.89694	0.903283	0.89571	0.889262	0.90204	0.898058	0.899694	0.89695	0.894843	0.891743	0.893056	0.886188	0.882805	0.882299	0.889208	0.878136	0.876989	0.868545	0.818557	0.891546	0.893676	0.885458	0.892331
SRR7414899	Bovismorbificans	B1	0.850752	0.904718	0.856704	0.873548	0.981572	0.965183	0.957427	0.947752	0.937371	0.900866	0.91952	0.941769	0.884243	0.889304	0.871758	0.865139	0.861917	0.856931	0.897982	0.897472	0.888589	0.890213	0.880076	0.90422	0.895265	0.901477	0.894092	0.887771	0.899724	0.896414	0.897388	0.894784	0.893242	0.889803	0.890964	0.884624	0.881234	0.880721	0.887499	0.876385	0.874853	0.867015	0.816916	0.889096	0.891401	0.882953	0.88987
CQPF01	Bovismorbificans	B1	0.847062	0.900624	0.852429	0.870109	0.979584	0.978719	0.973211	0.966835	0.934556	0.915332	0.933455	0.952571	0.880653	0.885457	0.868577	0.860292	0.857083	0.853449	0.893263	0.892996	0.885176	0.886842	0.876996	0.900016	0.891155	0.897922	0.889438	0.883459	0.896779	0.89213	0.894335	0.891796	0.888852	0.886269	0.887521	0.880387	0.876652	0.877162	0.883276	0.872139	0.871155	0.862612	0.812883	0.886026	0.888115	0.879975	0.887446
CQPK01	Bovismorbificans	B1	0.839848	0.892641	0.844789	0.862482	0.971464	0.972728	0.968587	0.96181	0.92611	0.912615	0.930405	0.946042	0.872939	0.877322	0.860609	0.852451	0.849197	0.845919	0.885306	0.884942	0.877354	0.878932	0.869135	0.891937	0.883001	0.889781	0.881367	0.875499	0.889002	0.88407	0.886404	0.883941	0.880804	0.878347	0.879554	0.872425	0.868618	0.869204	0.875431	0.864249	0.863279	0.854925	0.805649	0.878423	0.880618	0.872358	0.879869
SRR2168403	Bovismorbificans	B1	0.851504	0.904444	0.856994	0.873873	0.98183	0.965862	0.958267	0.948556	0.938668	0.901782	0.920448	0.942563	0.884332	0.888961	0.872612	0.864863	0.861475	0.857736	0.897805	0.897344	0.889436	0.891135	0.880981	0.904212	0.895301	0.901714	0.894011	0.887749	0.900703	0.896268	0.898267	0.895801	0.893163	0.89069	0.891968	0.88467	0.881008	0.880667	0.887524	0.876522	0.875623	0.866878	0.817441	0.890692	0.890694	0.891183	0.898378
SRR7426475	Bovismorbificans	B1	0.849851	0.90476	0.855703	0.872431	0.98174	0.965356	0.957585	0.948115	0.93752	0.900659	0.919466	0.941536	0.883198	0.88829	0.870747	0.864253	0.860987	0.855974	0.896856	0.896335	0.887924	0.889175	0.879351	0.903078	0.894158	0.900386	0.892936	0.886565	0.898741	0.895296	0.896336	0.893748	0.892141	0.888745	0.889896	0.883512	0.880169	0.879782	0.886437	0.875316	0.873859	0.865961	0.816038	0.888209	0.890474	0.882054	0.888861
SRR7298400	Bovismorbificans	B1	0.844864	0.898508	0.850928	0.867623	0.974282	0.958333	0.950767	0.941013	0.930654	0.89466	0.913105	0.934928	0.878309	0.883022	0.866061	0.860615	0.856026	0.851374	0.891526	0.891085	0.882602	0.883991	0.874339	0.897773	0.888935	0.895059	0.887702	0.881375	0.89362	0.890049	0.891275	0.888823	0.8869	0.883688	0.884899	0.878396	0.875066	0.874406	0.881338	0.870322	0.868992	0.860996	0.811652	0.883016	0.88536	0.876821	0.883876
CQPO01	Bovismorbificans	B1	0.849518	0.885977	0.848577	0.867119	0.96356	0.960219	0.954091	0.946124	0.926713	0.906301	0.924231	0.943664	0.876381	0.884689	0.864224	0.856115	0.85283	0.849563	0.888845	0.888699	0.881187	0.882773	0.872818	0.895653	0.886752	0.893655	0.885044	0.87921	0.89281	0.887916	0.890157	0.88788	0.884604	0.882227	0.883487	0.875976	0.872331	0.872335	0.879075	0.868047	0.867155	0.858643	0.809472	0.888898	0.894353	0.88345	0.891027
CQPJ01	Bovismorbificans	B1	0.825977	0.87718	0.830349	0.847642	0.953361	0.956755	0.953473	0.948059	0.909356	0.89907	0.916522	0.928591	0.85782	0.862368	0.845984	0.837849	0.834781	0.831424	0.869867	0.86951	0.862188	0.86373	0.854148	0.876295	0.867665	0.874304	0.866026	0.860314	0.873421	0.8687	0.87097	0.868641	0.865547	0.862951	0.864497	0.857261	0.853622	0.854648	0.8603	0.849468	0.848418	0.840422	0.792164	0.863233	0.865316	0.85751	0.864996
CQPN01	Bovismorbificans	B1	0.850956	0.902554	0.856308	0.874569	0.965598	0.964353	0.958647	0.951367	0.938649	0.919988	0.938022	0.956667	0.88479	0.890559	0.872326	0.863878	0.860578	0.857369	0.897774	0.897404	0.889773	0.891415	0.881489	0.904551	0.895238	0.902553	0.89373	0.88767	0.901656	0.896465	0.899033	0.896565	0.893212	0.890714	0.892218	0.884581	0.880753	0.881214	0.887614	0.876169	0.875204	0.866223	0.816421	0.892676	0.894888	0.886563	0.894205
CQPI01	Bovismorbificans	B1	0.836456	0.886649	0.841745	0.859651	0.948375	0.950618	0.947096	0.94299	0.922095	0.910903	0.928109	0.942677	0.870098	0.875446	0.857301	0.849105	0.845904	0.842973	0.882411	0.88212	0.874668	0.87619	0.866388	0.889215	0.88019	0.887025	0.878443	0.872698	0.886265	0.881261	0.883787	0.881455	0.878055	0.875612	0.877168	0.869572	0.865746	0.867159	0.872595	0.86145	0.860256	0.851578	0.802499	0.877386	0.87976	0.871549	0.879105
CQPH01	Bovismorbificans	B1	0.831888	0.884446	0.837403	0.854473	0.959749	0.960031	0.954362	0.946879	0.916548	0.898748	0.916168	0.93444	0.864754	0.869024	0.852814	0.845011	0.841829	0.838477	0.876805	0.876585	0.869059	0.870898	0.861097	0.88337	0.874601	0.881295	0.873085	0.867454	0.880371	0.875814	0.877805	0.875464	0.872615	0.870057	0.871424	0.864343	0.860754	0.860733	0.867252	0.856376	0.855387	0.85325	0.799337	0.869905	0.871676	0.863841	0.871226
SRR5412515	Bovismorbificans	B1	0.84841	0.903083	0.854387	0.871242	0.968391	0.952492	0.94525	0.935688	0.936599	0.899649	0.918438	0.940496	0.881784	0.886888	0.869885	0.862382	0.859085	0.855013	0.894899	0.89459	0.886754	0.88829	0.878023	0.901475	0.892469	0.898783	0.891308	0.885072	0.897808	0.893692	0.89563	0.892856	0.890487	0.887761	0.89461	0.881914	0.878538	0.877846	0.884897	0.873817	0.873071	0.864477	0.815163	0.893859	0.889172	0.881314	0.888105
CQPD01	Bovismorbificans	B1	0.795237	0.843378	0.798591	0.81569	0.916317	0.92287	0.920858	0.920991	0.875198	0.876379	0.891681	0.897124	0.825491	0.829569	0.813961	0.805836	0.802804	0.800159	0.836906	0.836544	0.829592	0.831508	0.821991	0.8433	0.835045	0.841323	0.833243	0.82809	0.840702	0.835942	0.838338	0.836134	0.832769	0.830547	0.83219	0.824879	0.821198	0.82361	0.827764	0.817339	0.816358	0.808511	0.761713	0.831075	0.833315	0.825471	0.832826
SRR3322142	Bovismorbificans	B1	0.838941	0.899876	0.84561	0.861895	0.933432	0.918815	0.911758	0.902515	0.925087	0.889497	0.907719	0.929631	0.872107	0.878131	0.861015	0.853227	0.850016	0.846081	0.885371	0.884953	0.877359	0.888145	0.869368	0.891638	0.882795	0.891568	0.884448	0.878208	0.88846	0.884367	0.88642	0.883652	0.883644	0.881145	0.8802	0.872794	0.876172	0.871149	0.875371	0.864617	0.866452	0.857074	0.807421	0.886788	0.881783	0.880776	0.888756
SRR5584942	Bovismorbificans	B1	0.853828	0.964007	0.865062	0.882141	0.945299	0.929792	0.922902	0.91382	0.934072	0.897869	0.916694	0.938692	0.893442	0.889524	0.880426	0.87345	0.87035	0.865027	0.906506	0.906554	0.897332	0.914175	0.888796	0.91351	0.904098	0.912605	0.905062	0.899086	0.908882	0.905695	0.906644	0.903601	0.904637	0.900709	0.898522	0.896782	0.897094	0.891386	0.905207	0.893726	0.894336	0.877648	0.824745	0.903392	0.891389	0.890553	0.898543
SRR3669921	Bovismorbificans	B1	0.844416	0.972968	0.855803	0.875031	0.934254	0.919017	0.912333	0.903426	0.92354	0.887736	0.906119	0.927759	0.883585	0.879558	0.870821	0.86392	0.860904	0.858119	0.900133	0.899564	0.890527	0.907106	0.882382	0.903121	0.894065	0.902288	0.894797	0.889132	0.898614	0.89549	0.896386	0.893458	0.89445	0.890768	0.888524	0.890066	0.890048	0.881348	0.895135	0.884055	0.884523	0.87186	0.81616	0.893141	0.881474	0.882355	0.888502
AZKX01	Bovismorbificans	B1	0.83713	0.949994	0.842934	0.862751	0.93217	0.9173	0.91046	0.901262	0.923216	0.887667	0.906305	0.928192	0.869662	0.875614	0.857615	0.850345	0.850053	0.845587	0.886657	0.886566	0.878408	0.879308	0.869992	0.889154	0.880158	0.886567	0.878815	0.87288	0.885274	0.881533	0.883058	0.880441	0.878391	0.875322	0.876571	0.875054	0.870528	0.86626	0.877507	0.866547	0.865097	0.855568	0.804315	0.877142	0.879635	0.873565	0.877983
AZLA01	Bovismorbificans	B1	0.833384	0.945601	0.83956	0.859165	0.927771	0.913339	0.906446	0.897322	0.918923	0.884013	0.902445	0.924284	0.866106	0.872013	0.854056	0.846873	0.846583	0.84223	0.882916	0.882865	0.874686	0.875686	0.866313	0.885365	0.876486	0.882856	0.875152	0.869261	0.881564	0.877795	0.879297	0.876765	0.874728	0.871708	0.872862	0.87137	0.866944	0.862691	0.873856	0.862973	0.861487	0.852101	0.801205	0.873464	0.875902	0.869845	0.87426
AZKW01	Bovismorbificans	B1	0.829884	0.941466	0.835968	0.855423	0.92409	0.909454	0.902584	0.893433	0.915089	0.879977	0.898362	0.91996	0.862169	0.86796	0.850532	0.843202	0.842908	0.838685	0.878871	0.878763	0.870945	0.871923	0.862735	0.881366	0.872544	0.878698	0.871191	0.86537	0.877696	0.873893	0.875537	0.872886	0.870742	0.86784	0.86915	0.867637	0.86304	0.85868	0.869889	0.859205	0.857789	0.848342	0.798046	0.869565	0.871968	0.866216	0.870477
SRR3721475	Bovismorbificans	B1	0.834453	0.897156	0.838971	0.855565	0.92628	0.910931	0.904185	0.894894	0.928242	0.891801	0.899931	0.921686	0.864738	0.870638	0.857461	0.859696	0.847572	0.840281	0.878907	0.879311	0.870872	0.872623	0.867837	0.883891	0.879426	0.881205	0.878822	0.873196	0.884986	0.881653	0.882793	0.88021	0.878714	0.875304	0.87639	0.873486	0.863936	0.861213	0.873796	0.863011	0.861505	0.850235	0.803014	0.871744	0.880273	0.868482	0.872504
CSTI01	Bovismorbificans	B1	0.821193	0.863346	0.818825	0.837338	0.896078	0.900462	0.89727	0.894626	0.894753	0.891363	0.910131	0.915942	0.846152	0.856809	0.834192	0.825723	0.822868	0.820312	0.858312	0.858077	0.851073	0.852378	0.843081	0.864992	0.856241	0.863085	0.854546	0.849432	0.862355	0.857517	0.860081	0.857642	0.854074	0.851947	0.853217	0.847504	0.842074	0.84838	0.856671	0.845654	0.844324	0.828437	0.780401	0.861855	0.86757	0.856057	0.863725
SRR5412503	Bovismorbificans	B1	0.828949	0.872223	0.83105	0.846197	0.914234	0.899375	0.892662	0.883469	0.95079	0.912367	0.906747	0.928475	0.856647	0.864347	0.845048	0.850645	0.83435	0.831695	0.868489	0.868043	0.861094	0.862664	0.853676	0.874562	0.866277	0.872325	0.865124	0.859248	0.871794	0.86734	0.869349	0.866933	0.864373	0.86209	0.863368	0.856147	0.852944	0.852631	0.859174	0.848942	0.848092	0.839424	0.793909	0.864716	0.868367	0.858285	0.865155
SRR5412455	Bovismorbificans	B1	0.832478	0.875956	0.833589	0.849734	0.918255	0.903147	0.896607	0.887248	0.943023	0.905352	0.910048	0.931908	0.859445	0.867146	0.848395	0.854295	0.837878	0.834027	0.872157	0.871922	0.864533	0.865967	0.856591	0.878405	0.869784	0.875936	0.868782	0.862844	0.875443	0.87118	0.873115	0.870442	0.868088	0.865674	0.867007	0.85987	0.856651	0.85644	0.862683	0.852236	0.851279	0.842932	0.796315	0.868362	0.872389	0.862193	0.86875
SRR1263448	Bovismorbificans	B1	0.855565	0.888094	0.867878	0.884666	0.92144	0.906183	0.899705	0.890757	0.9145	0.880542	0.899179	0.919854	0.89516	0.901077	0.885823	0.878522	0.875032	0.867154	0.912725	0.912881	0.903644	0.912927	0.893106	0.919486	0.910354	0.919278	0.910993	0.904927	0.914996	0.911694	0.912726	0.910037	0.910536	0.906938	0.90375	0.896825	0.903346	0.897899	0.902586	0.890889	0.890986	0.88312	0.828902	0.909024	0.904574	0.901966	0.910122
SRR1562617	Bovismorbificans	B1	0.837658	0.86926	0.848612	0.865383	0.901361	0.887552	0.88193	0.874095	0.894986	0.863798	0.882244	0.900965	0.875438	0.88089	0.866898	0.858989	0.855717	0.848563	0.89235	0.892339	0.88417	0.892944	0.873945	0.898942	0.88996	0.898814	0.890596	0.884747	0.895347	0.891191	0.893057	0.89037	0.89006	0.886806	0.884112	0.876795	0.883042	0.87822	0.882587	0.871173	0.871939	0.863635	0.811016	0.88945	0.884884	0.882596	0.890473
SRR7358956	Bovismorbificans	B1	0.828278	0.87164	0.83038	0.845592	0.913342	0.89836	0.891908	0.882573	0.936895	0.90016	0.90466	0.926264	0.855434	0.862696	0.85022	0.856478	0.840081	0.829672	0.86796	0.867543	0.860111	0.861449	0.858483	0.873987	0.871142	0.871575	0.870845	0.864772	0.876986	0.873175	0.874702	0.872129	0.870164	0.867408	0.868552	0.861922	0.852459	0.852245	0.860045	0.849586	0.848617	0.838923	0.796373	0.863335	0.876409	0.857115	0.864168
SRR2168400	Bovismorbificans	B1	0.829205	0.87471	0.83252	0.848774	0.917021	0.902126	0.895364	0.886002	0.927104	0.890227	0.90842	0.930463	0.858392	0.866116	0.847401	0.839894	0.836751	0.833225	0.871244	0.870875	0.863798	0.865616	0.856317	0.877329	0.868772	0.874816	0.867902	0.861869	0.874379	0.870075	0.872051	0.869689	0.866914	0.865197	0.866136	0.858837	0.85554	0.855341	0.861596	0.851164	0.850107	0.841922	0.79535	0.867325	0.871156	0.86111	0.867917
CQPA01	Bovismorbificans	B1	0.767831	0.814771	0.771395	0.788233	0.883725	0.891309	0.889174	0.89045	0.844541	0.851163	0.866479	0.865832	0.797535	0.801657	0.786006	0.778272	0.775288	0.773605	0.808183	0.80802	0.801138	0.802892	0.793922	0.814324	0.806543	0.812429	0.8047	0.800234	0.811846	0.80724	0.809759	0.807817	0.804294	0.802018	0.803436	0.79687	0.793153	0.803106	0.79927	0.78915	0.78837	0.780878	0.735734	0.802084	0.8041	0.796616	0.803728
CQPC01	Bovismorbificans	B1	0.78104	0.848527	0.785347	0.80166	0.89889	0.905133	0.901955	0.899229	0.858929	0.855834	0.87097	0.878421	0.810933	0.814922	0.799918	0.792326	0.793776	0.787164	0.821948	0.821669	0.815217	0.816568	0.808088	0.827961	0.819884	0.825991	0.818405	0.813353	0.825559	0.820928	0.823364	0.821186	0.817958	0.815951	0.817163	0.810379	0.806985	0.809961	0.813163	0.803233	0.802339	0.794822	0.75015	0.815918	0.817726	0.810904	0.817889
SRR1969672	Bovismorbificans	B1	0.814075	0.865702	0.829106	0.835926	0.935038	0.919977	0.913043	0.903633	0.894809	0.859939	0.877118	0.898466	0.846005	0.849118	0.834975	0.828029	0.82486	0.821319	0.857969	0.857622	0.85023	0.85178	0.842175	0.863871	0.855725	0.861538	0.85455	0.848952	0.86045	0.856784	0.858346	0.855877	0.853819	0.851138	0.852231	0.846045	0.842841	0.841932	0.848716	0.838456	0.837708	0.829783	0.792669	0.850731	0.850724	0.844018	0.8501
SRR5412516	Bovismorbificans	B1	0.819238	0.868341	0.825995	0.840016	0.909651	0.895275	0.888472	0.87932	0.89875	0.863603	0.881227	0.902266	0.84979	0.855513	0.843912	0.836557	0.833574	0.825099	0.862277	0.862055	0.855146	0.856474	0.852116	0.868526	0.866149	0.86596	0.864144	0.858341	0.87075	0.867375	0.869476	0.866933	0.863472	0.861046	0.862086	0.855413	0.846967	0.846392	0.854174	0.84393	0.842979	0.83337	0.793393	0.857338	0.871089	0.853466	0.860059
SRR4449989	Bovismorbificans	B1	0.858432	0.871145	0.850893	0.864911	0.881354	0.867253	0.86101	0.852522	0.881734	0.848659	0.861187	0.881022	0.875615	0.87326	0.865152	0.862053	0.856455	0.84845	0.888455	0.888914	0.879797	0.891112	0.871526	0.895269	0.886693	0.895339	0.888067	0.882359	0.891047	0.889065	0.889598	0.886839	0.887731	0.883924	0.88198	0.878141	0.880559	0.879718	0.883988	0.872965	0.874891	0.863136	0.816568	0.88382	0.875168	0.871154	0.878545
SRR5955622	Bovismorbificans	B1	0.857699	0.86957	0.850412	0.864668	0.880599	0.867	0.860706	0.852474	0.881161	0.84819	0.860507	0.880723	0.875847	0.872351	0.864317	0.861429	0.85581	0.847889	0.888015	0.888349	0.879085	0.889516	0.870801	0.894754	0.885983	0.894195	0.886861	0.881146	0.890166	0.888275	0.888766	0.886139	0.886776	0.882713	0.880967	0.877571	0.88088	0.878259	0.883389	0.872461	0.874269	0.862312	0.816195	0.882299	0.874067	0.869768	0.877422
MXXQ01	Bovismorbificans	B1	0.854345	0.863845	0.846729	0.86094	0.876851	0.863904	0.85742	0.848983	0.877781	0.844838	0.857355	0.877256	0.870833	0.868649	0.861015	0.857161	0.851712	0.844753	0.883653	0.883611	0.875677	0.884491	0.867559	0.890028	0.881364	0.895873	0.887988	0.881921	0.887	0.883755	0.885356	0.882837	0.886226	0.883161	0.877822	0.873311	0.87525	0.879229	0.878925	0.86811	0.876289	0.862755	0.813153	0.879283	0.87061	0.867038	0.875672
SRR1646399	Bovismorbificans	B1	0.82655	0.842016	0.830063	0.851399	0.869263	0.855648	0.849668	0.841171	0.866438	0.834096	0.851319	0.870996	0.854937	0.859137	0.846727	0.839736	0.836872	0.834315	0.874998	0.875383	0.867694	0.869109	0.858409	0.875554	0.86735	0.873709	0.86641	0.860597	0.872641	0.86855	0.870539	0.867762	0.86566	0.862949	0.862773	0.864363	0.86088	0.861751	0.860379	0.849864	0.849382	0.846306	0.79521	0.868597	0.866343	0.871371	0.873474
SRR5412377	Bovismorbificans	B1	0.79642	0.844409	0.81747	0.830388	0.872409	0.858419	0.852003	0.843248	0.864809	0.830952	0.847275	0.867799	0.839601	0.844955	0.829092	0.822234	0.82043	0.816651	0.831486	0.831203	0.824392	0.825799	0.816942	0.836544	0.828678	0.834332	0.827758	0.822194	0.833679	0.83032	0.831643	0.829243	0.827163	0.825049	0.82596	0.821285	0.81733	0.815353	0.826467	0.816832	0.815973	0.804654	0.788153	0.82605	0.82787	0.821024	0.826592
SRR1967088	Bovismorbificans	B1	0.822843	0.844256	0.890377	0.908432	0.865094	0.851734	0.845827	0.837207	0.860554	0.828472	0.845001	0.864638	0.91901	0.928843	0.908794	0.90094	0.8977	0.891283	0.894491	0.893978	0.886484	0.895486	0.878192	0.900706	0.891873	0.900299	0.893421	0.887185	0.897637	0.893156	0.894136	0.892057	0.891902	0.889779	0.887246	0.88328	0.888961	0.879116	0.89082	0.879825	0.880584	0.865916	0.850702	0.905065	0.887951	0.922974	0.929025
SRR7251068	Bovismorbificans	B1	0.813733	0.830529	0.86513	0.882317	0.842848	0.829706	0.823742	0.815616	0.841775	0.810553	0.824008	0.843073	0.891736	0.893363	0.90001	0.895439	0.889987	0.879079	0.868075	0.867688	0.860172	0.869159	0.85185	0.873864	0.865495	0.874215	0.867205	0.861485	0.870452	0.866489	0.867248	0.8654	0.86611	0.86306	0.860596	0.857336	0.863476	0.854914	0.864614	0.854324	0.871873	0.858642	0.82639	0.890196	0.869372	0.902636	0.909542
SRR7298397	Bovismorbificans	B1	0.80481	0.824216	0.866795	0.883332	0.838117	0.824975	0.819001	0.810877	0.833306	0.802308	0.817623	0.836615	0.894243	0.898664	0.901215	0.895544	0.892226	0.88043	0.870659	0.870106	0.861746	0.87143	0.853499	0.876218	0.867944	0.876581	0.870323	0.864346	0.87217	0.869035	0.868732	0.866808	0.869248	0.865303	0.86207	0.859975	0.864482	0.857156	0.86741	0.85713	0.874011	0.861783	0.828113	0.876729	0.859317	0.891615	0.898745
SRR7426611	Bovismorbificans	B1	0.796966	0.812469	0.854962	0.871244	0.829655	0.816647	0.810754	0.802506	0.830135	0.798737	0.809366	0.8283	0.881476	0.889842	0.889228	0.887833	0.880141	0.855127	0.858416	0.857839	0.850185	0.858787	0.842054	0.863828	0.855773	0.863615	0.857524	0.851492	0.86012	0.857138	0.856912	0.855021	0.856438	0.85296	0.850637	0.848	0.853373	0.843844	0.854923	0.844949	0.861943	0.849261	0.817552	0.8603	0.851003	0.877346	0.885636
SRR1646411	Bovismorbificans	B1	0.775098	0.81509	0.777985	0.790912	0.851908	0.838148	0.831924	0.823195	0.884673	0.848948	0.84358	0.863847	0.800447	0.807041	0.790126	0.795442	0.780965	0.778546	0.810837	0.810391	0.804259	0.805862	0.797482	0.816137	0.808807	0.814054	0.807883	0.80293	0.813554	0.809761	0.811489	0.809456	0.807195	0.806446	0.806362	0.800006	0.797261	0.796236	0.80258	0.79345	0.792776	0.785312	0.745493	0.807453	0.810441	0.801648	0.807562
SRR7414972	Bovismorbificans	B1	0.745232	0.79156	0.753079	0.764332	0.852261	0.838227	0.831903	0.823355	0.816289	0.784445	0.799188	0.818261	0.773184	0.776412	0.763728	0.758433	0.756512	0.75193	0.783422	0.782997	0.776581	0.777715	0.769945	0.788151	0.781296	0.786079	0.780521	0.775459	0.785119	0.782251	0.783307	0.781233	0.779829	0.777336	0.778375	0.773226	0.77065	0.769107	0.775381	0.766822	0.765956	0.759617	0.725202	0.776311	0.777809	0.771828	0.777149
AZKY01	Bovismorbificans	B1	0.837542	0.950326	0.843307	0.863385	0.932791	0.918199	0.911309	0.902139	0.923778	0.888537	0.907222	0.928979	0.87009	0.876115	0.858265	0.850717	0.850416	0.846227	0.887059	0.887001	0.879117	0.880023	0.870766	0.889662	0.8806	0.887096	0.879253	0.873296	0.886012	0.882036	0.883756	0.881165	0.878835	0.875816	0.877098	0.875581	0.870912	0.866659	0.877982	0.867061	0.865707	0.856052	0.804753	0.877614	0.880219	0.874123	0.878603
AZKZ01	Bovismorbificans	B1	0.835099	0.947665	0.841462	0.861456	0.929756	0.915889	0.909227	0.899877	0.920612	0.886462	0.904967	0.926538	0.868231	0.873981	0.856321	0.848904	0.848639	0.84449	0.885019	0.885065	0.877279	0.878152	0.868936	0.887633	0.878597	0.88526	0.877224	0.871514	0.883943	0.879972	0.881755	0.879105	0.876797	0.873884	0.87519	0.873543	0.869056	0.864641	0.875957	0.865109	0.863747	0.854244	0.803108	0.875318	0.877613	0.871744	0.876041
AZKQ01	Bovismorbificans	B1	0.825448	0.936111	0.831354	0.850807	0.918429	0.903765	0.897018	0.887881	0.909618	0.874506	0.892766	0.914229	0.85737	0.863115	0.845741	0.8386	0.838355	0.833985	0.874013	0.873797	0.866032	0.866855	0.857843	0.876308	0.867555	0.873782	0.866309	0.860481	0.872715	0.868909	0.870487	0.86795	0.865853	0.863022	0.864069	0.862803	0.858334	0.853851	0.864997	0.854369	0.852968	0.84367	0.79375	0.864517	0.867013	0.861056	0.865324
WSCW01	Bovismorbificans	B1	0.864679	0.912984	0.867335	0.885189	0.958928	0.942874	0.935769	0.926615	0.968153	0.93109	0.950937	0.973474	0.895546	0.904242	0.882877	0.875454	0.871927	0.867085	0.909491	0.909562	0.900489	0.902082	0.891558	0.916587	0.907127	0.913803	0.905567	0.89936	0.912236	0.908616	0.909461	0.906669	0.905173	0.901481	0.902836	0.896208	0.892594	0.892693	0.899256	0.887728	0.885707	0.877872	0.826074	0.904453	0.909756	0.897547	0.904988
WSCX01	Bovismorbificans	B1	0.860685	0.881314	0.918415	0.94693	0.90754	0.892999	0.886599	0.877748	0.900492	0.867122	0.885261	0.905797	0.950593	0.939213	0.939092	0.933756	0.929283	0.920119	0.981239	0.984077	0.971566	0.981403	0.962267	0.977744	0.968174	0.973693	0.966639	0.959675	0.970853	0.969075	0.967243	0.965181	0.965705	0.959873	0.957307	0.970848	0.964068	0.949097	0.959791	0.946672	0.942028	0.945089	0.873242	0.925635	0.920477	0.917743	0.91926
WSCY01	Bovismorbificans	B1	0.854244	0.87859	0.914459	0.932568	0.899657	0.885296	0.878953	0.870193	0.893026	0.859796	0.877498	0.897825	0.943991	0.93333	0.949269	0.943279	0.938805	0.911757	0.964389	0.963816	0.952019	0.962686	0.956929	0.971365	0.968434	0.970564	0.979427	0.972747	0.981393	0.98512	0.983582	0.981448	0.978442	0.973312	0.971117	0.957967	0.953475	0.945579	0.955129	0.942355	0.941204	0.933011	0.874025	0.92553	0.929218	0.910988	0.919524
WSCZ01	Bovismorbificans	B1	0.873686	0.870929	0.865528	0.88046	0.897433	0.883256	0.876713	0.868078	0.897755	0.863795	0.876833	0.897394	0.890989	0.888947	0.879936	0.876718	0.870853	0.862892	0.904715	0.904949	0.895382	0.896719	0.886767	0.911498	0.902506	0.908993	0.901214	0.895213	0.906907	0.904894	0.905425	0.902624	0.901061	0.896881	0.897241	0.892491	0.888536	0.892474	0.894984	0.883748	0.88293	0.875801	0.829423	0.89162	0.890582	0.878852	0.885753
WSDA01	Bovismorbificans	B1	0.869282	0.917354	0.871806	0.889927	0.963502	0.947435	0.940492	0.930828	0.97277	0.934918	0.955163	0.9782	0.899961	0.908747	0.887318	0.879848	0.876341	0.871597	0.914111	0.914001	0.905197	0.906611	0.89622	0.921148	0.911639	0.918367	0.910195	0.903802	0.916793	0.913081	0.914242	0.911357	0.909636	0.906204	0.907403	0.900793	0.896991	0.897317	0.904596	0.893025	0.891081	0.882186	0.830453	0.909031	0.914407	0.902214	0.909571
WSDB01	Bovismorbificans	B1	0.858737	0.904043	0.860122	0.876506	0.948791	0.932669	0.925863	0.91629	0.994979	0.954689	0.940017	0.962581	0.887643	0.896147	0.874349	0.881082	0.863724	0.860055	0.900259	0.900164	0.891544	0.892953	0.882881	0.907063	0.898183	0.904421	0.896591	0.890407	0.902871	0.899341	0.900301	0.897567	0.89612	0.892791	0.893858	0.887341	0.883927	0.883857	0.890554	0.879381	0.877608	0.869391	0.819892	0.895515	0.900377	0.888695	0.895821
WSDC01	Bovismorbificans	B1	0.861725	0.879568	0.923484	0.942435	0.908642	0.894085	0.887538	0.87872	0.901703	0.868211	0.886239	0.90672	0.95443	0.94287	0.958485	0.952979	0.948326	0.920694	0.974575	0.974246	0.961836	0.964135	0.96677	0.981563	0.978546	0.977605	0.986805	0.980628	0.991343	0.989487	0.987442	0.985415	0.986085	0.980096	0.974923	0.968637	0.956753	0.952758	0.965358	0.952345	0.947661	0.940495	0.880955	0.927053	0.933958	0.91302	0.920719
WSDD01	Bovismorbificans	B1	0.85764	0.913022	0.86361	0.880703	0.991942	0.975222	0.967474	0.95778	0.946489	0.909627	0.92887	0.951064	0.89134	0.896683	0.87869	0.871705	0.868209	0.863679	0.904871	0.904766	0.895782	0.897396	0.887044	0.911674	0.902619	0.909	0.901006	0.894801	0.907122	0.903711	0.904714	0.902129	0.900512	0.896883	0.898115	0.891824	0.888164	0.887565	0.894763	0.883409	0.88176	0.873939	0.822918	0.896462	0.898779	0.890105	0.897332
WSDE01	Bovismorbificans	B1	0.859172	0.914632	0.865074	0.882279	0.993807	0.976992	0.969202	0.959445	0.948157	0.911298	0.930393	0.952763	0.892922	0.898285	0.880206	0.873181	0.869673	0.865116	0.90645	0.906426	0.897363	0.898985	0.888628	0.913326	0.904236	0.910621	0.902583	0.896446	0.90877	0.905325	0.906322	0.90375	0.902116	0.898468	0.899712	0.893388	0.889728	0.889147	0.896387	0.88506	0.883323	0.875504	0.824272	0.898089	0.900381	0.891693	0.898923
WSDF01	Bovismorbificans	B1	0.857246	0.912637	0.863219	0.880513	0.991528	0.974969	0.967136	0.957495	0.945986	0.909473	0.928507	0.950757	0.891038	0.896373	0.878439	0.871346	0.867902	0.863469	0.904489	0.904463	0.895524	0.897153	0.886805	0.91141	0.902305	0.908618	0.900648	0.894491	0.906861	0.903388	0.904497	0.901918	0.900194	0.896635	0.897794	0.891491	0.887856	0.887257	0.894412	0.882981	0.881398	0.873662	0.822699	0.896232	0.898542	0.889793	0.897163
WSDG01	Bovismorbificans	B1	0.857438	0.912847	0.863315	0.880567	0.991693	0.975031	0.967337	0.957591	0.946216	0.909526	0.92862	0.950895	0.891162	0.896546	0.878454	0.871481	0.868029	0.863469	0.904642	0.904664	0.895559	0.89725	0.886822	0.911514	0.902394	0.908752	0.900773	0.894653	0.90695	0.903571	0.904551	0.90199	0.900334	0.896766	0.897862	0.891764	0.888003	0.887339	0.894614	0.883146	0.881506	0.873853	0.822772	0.89628	0.898675	0.889894	0.897162
WSDH01	Bovismorbificans	B1	0.84471	0.899041	0.850816	0.86758	0.975873	0.959582	0.952055	0.942408	0.931355	0.895378	0.91395	0.935893	0.877783	0.882978	0.865595	0.858722	0.855345	0.850994	0.890879	0.890889	0.882191	0.883814	0.873717	0.897575	0.888733	0.894902	0.887164	0.881188	0.893258	0.889901	0.890897	0.888412	0.886835	0.883281	0.884346	0.878241	0.874743	0.873933	0.881176	0.870048	0.868512	0.861009	0.811454	0.882773	0.88496	0.876528	0.883662
WSDI01	Bovismorbificans	B1	0.857644	0.913047	0.863488	0.880634	0.99187	0.975103	0.967372	0.957629	0.946328	0.909472	0.928587	0.950938	0.891294	0.896656	0.878573	0.871616	0.868137	0.863521	0.904784	0.904753	0.895666	0.897327	0.886957	0.911652	0.902528	0.908875	0.900934	0.894737	0.907101	0.903666	0.904668	0.90204	0.900448	0.896781	0.89801	0.891811	0.888092	0.887487	0.894726	0.88332	0.881719	0.873904	0.822887	0.896429	0.898804	0.890021	0.897205
WSDJ01	Bovismorbificans	B1	0.859481	0.914958	0.86546	0.882673	0.994199	0.977492	0.969726	0.959939	0.948527	0.911649	0.930841	0.953238	0.893312	0.898684	0.880585	0.873584	0.870086	0.865484	0.906905	0.906819	0.897736	0.899465	0.889002	0.913752	0.904599	0.911065	0.903046	0.896845	0.909191	0.905773	0.906779	0.904147	0.902515	0.898827	0.900108	0.893769	0.890147	0.88955	0.896785	0.885345	0.883728	0.875872	0.824685	0.898524	0.900821	0.892133	0.899347
WSDK01	Bovismorbificans	B1	0.858185	0.913635	0.864133	0.881298	0.992662	0.975865	0.96816	0.958335	0.947034	0.910147	0.929261	0.951641	0.891909	0.897263	0.879281	0.872268	0.868767	0.864198	0.905471	0.905387	0.89636	0.897989	0.887598	0.912303	0.903201	0.909615	0.901602	0.895402	0.907729	0.904352	0.905306	0.902763	0.901131	0.897487	0.898694	0.892405	0.888751	0.888147	0.895345	0.883979	0.882307	0.874527	0.823414	0.897082	0.899414	0.890687	0.897902
WSDL01	Bovismorbificans	B1	0.85948	0.914838	0.865301	0.882494	0.994007	0.977323	0.969581	0.959825	0.948368	0.911467	0.930645	0.953077	0.893146	0.898603	0.880473	0.873437	0.869946	0.865333	0.906746	0.906675	0.89762	0.899268	0.888832	0.913621	0.9045	0.910916	0.902877	0.896646	0.909034	0.905606	0.906619	0.903986	0.902367	0.898722	0.89996	0.893654	0.889972	0.889389	0.89662	0.885193	0.883554	0.875732	0.824505	0.898389	0.900744	0.892011	0.899258
WSDM01	Bovismorbificans	B1	0.858872	0.91417	0.864709	0.881955	0.993614	0.977011	0.969267	0.959501	0.947987	0.911146	0.930414	0.952736	0.892623	0.897938	0.880092	0.872905	0.869418	0.864929	0.906109	0.906017	0.897284	0.898824	0.888508	0.912976	0.903848	0.910369	0.902243	0.896066	0.9086	0.905008	0.906173	0.903588	0.901768	0.89817	0.89952	0.89304	0.889347	0.88883	0.896064	0.884655	0.883123	0.875151	0.824116	0.897923	0.900184	0.891522	0.898706
WSDN01	Bovismorbificans	B1	0.859708	0.915044	0.865534	0.882724	0.994418	0.977767	0.969942	0.960234	0.948725	0.911961	0.93106	0.953538	0.893375	0.898827	0.880679	0.873572	0.870074	0.865579	0.90689	0.906823	0.897834	0.899522	0.889079	0.913742	0.90461	0.911141	0.903012	0.896854	0.909321	0.905798	0.906857	0.904278	0.902582	0.898948	0.900188	0.893766	0.890129	0.889545	0.896824	0.885369	0.883805	0.875916	0.824713	0.898698	0.900976	0.8923	0.89962
WSDO01	Bovismorbificans	B1	0.859356	0.914814	0.865173	0.88238	0.994024	0.977159	0.969365	0.959598	0.948288	0.911313	0.930523	0.952941	0.893058	0.898639	0.880361	0.873388	0.869869	0.865211	0.906657	0.906617	0.897489	0.899175	0.888738	0.913527	0.904427	0.910799	0.902774	0.896561	0.908887	0.905588	0.906477	0.903881	0.902365	0.898609	0.899865	0.89352	0.889894	0.889322	0.896575	0.885176	0.883434	0.875696	0.824424	0.89832	0.90062	0.891859	0.899094
WSDP01	Bovismorbificans	B1	0.857981	0.91331	0.86396	0.88112	0.992339	0.975679	0.967865	0.958128	0.946851	0.910098	0.929069	0.951477	0.891678	0.89703	0.879099	0.872045	0.868557	0.864039	0.905258	0.905113	0.896241	0.897783	0.88746	0.912019	0.902978	0.909411	0.901394	0.895135	0.90753	0.904055	0.905141	0.902537	0.900834	0.897259	0.898501	0.892101	0.888532	0.887904	0.895104	0.88374	0.882146	0.87425	0.823252	0.896862	0.89914	0.890496	0.897752
WSDQ01	Bovismorbificans	B1	0.859474	0.914862	0.865253	0.882621	0.994065	0.977504	0.969737	0.959965	0.948473	0.911684	0.930825	0.953204	0.89316	0.898633	0.880534	0.873411	0.869954	0.865443	0.906753	0.906707	0.89772	0.899338	0.888943	0.913606	0.904475	0.910907	0.902873	0.896664	0.90912	0.905597	0.906707	0.904138	0.902373	0.898802	0.899988	0.893683	0.889991	0.889383	0.896619	0.885108	0.883569	0.875738	0.824565	0.898473	0.900834	0.892103	0.899407
WSDR01	Bovismorbificans	B1	0.857703	0.913252	0.863288	0.880892	0.991876	0.975474	0.968249	0.958454	0.946585	0.910749	0.929413	0.951483	0.89144	0.896763	0.878935	0.871509	0.868052	0.863805	0.904734	0.904689	0.896038	0.89776	0.88732	0.911592	0.902423	0.908795	0.900908	0.894946	0.907385	0.903592	0.905075	0.902456	0.900352	0.897119	0.898362	0.891648	0.888055	0.88854	0.894622	0.883145	0.881796	0.873782	0.822965	0.896832	0.899036	0.890313	0.897787
WSDS01	Bovismorbificans	B1	0.859406	0.914903	0.865277	0.882471	0.994192	0.9773	0.969557	0.959705	0.948417	0.911476	0.930705	0.953015	0.893145	0.898598	0.880476	0.873449	0.86994	0.865363	0.906748	0.906688	0.897578	0.899258	0.888838	0.913599	0.904498	0.910886	0.902868	0.89666	0.90901	0.90567	0.90657	0.904049	0.902454	0.898702	0.899949	0.893594	0.889977	0.889374	0.896665	0.885238	0.883527	0.875772	0.824524	0.89844	0.900699	0.891987	0.899132
WSDT01	Bovismorbificans	B1	0.859603	0.915203	0.865477	0.882677	0.994246	0.977552	0.96966	0.959919	0.948615	0.911565	0.930844	0.953155	0.893434	0.898707	0.880748	0.873624	0.870136	0.865637	0.906999	0.9069	0.897886	0.899515	0.889116	0.913861	0.904717	0.911096	0.903078	0.896862	0.909399	0.905818	0.906894	0.904277	0.902608	0.899014	0.9002	0.893812	0.890188	0.889516	0.896817	0.885458	0.883884	0.875923	0.824755	0.898649	0.900984	0.892261	0.899388
WSDU01	Bovismorbificans	B1	0.838068	0.861676	0.859086	0.894497	0.880559	0.866288	0.860326	0.851613	0.877125	0.844492	0.861498	0.881772	0.88569	0.880937	0.876918	0.870004	0.866582	0.860981	0.912125	0.910804	0.901756	0.909509	0.894743	0.908272	0.901238	0.908699	0.90209	0.896147	0.905652	0.901963	0.902238	0.90063	0.901592	0.898346	0.893549	0.894907	0.898501	0.885773	0.906272	0.894958	0.895612	0.879094	0.820941	0.89844	0.892701	0.892545	0.893966
WSDV01	Bovismorbificans	B1	0.851498	0.90647	0.857535	0.874622	0.984434	0.967858	0.960393	0.95057	0.939311	0.903063	0.921917	0.943907	0.884985	0.890244	0.872555	0.865547	0.862157	0.857731	0.898268	0.898233	0.889435	0.891072	0.880808	0.905094	0.896059	0.902376	0.894464	0.888397	0.90066	0.897179	0.898267	0.895705	0.894052	0.890565	0.891615	0.885446	0.881857	0.881124	0.888361	0.877015	0.875476	0.867845	0.817537	0.889992	0.892299	0.883641	0.890898
WSDW01	Bovismorbificans	B1	0.858477	0.913951	0.864394	0.881721	0.993084	0.976267	0.968665	0.958813	0.947349	0.910651	0.929828	0.952118	0.892301	0.897698	0.879697	0.872576	0.869104	0.864625	0.905807	0.905784	0.896747	0.898426	0.888024	0.912706	0.903589	0.909979	0.901947	0.895811	0.90816	0.904739	0.905744	0.90323	0.901487	0.897906	0.899065	0.892754	0.889135	0.888507	0.89573	0.88424	0.882618	0.8749	0.823771	0.897477	0.899813	0.890989	0.898368
WSDX01	Bovismorbificans	B1	0.861721	0.879537	0.924669	0.94218	0.908796	0.894134	0.887649	0.878839	0.902841	0.869435	0.886247	0.906783	0.957266	0.945723	0.941452	0.936269	0.931708	0.923184	0.973635	0.973281	0.960775	0.962712	0.950048	0.98794	0.977431	0.976431	0.969283	0.96261	0.973647	0.972263	0.970245	0.968067	0.968543	0.962741	0.957941	0.951632	0.955997	0.951988	0.962876	0.949685	0.94503	0.938766	0.878982	0.926768	0.923066	0.912888	0.920383
WSDY01	Bovismorbificans	B1	0.863318	0.928633	0.868751	0.886861	0.963109	0.947566	0.940481	0.930901	0.953602	0.91686	0.936465	0.95903	0.897149	0.903613	0.884276	0.876512	0.873411	0.869128	0.910838	0.910793	0.902081	0.90363	0.893272	0.917895	0.908294	0.915057	0.90682	0.900558	0.913723	0.909756	0.911413	0.90867	0.906441	0.9031	0.904508	0.899085	0.893901	0.893826	0.905402	0.89376	0.892129	0.878843	0.827679	0.905055	0.907966	0.898419	0.905959
WSDZ01	Bovismorbificans	B1	0.86251	0.927844	0.86811	0.886255	0.962371	0.946874	0.939814	0.930201	0.952824	0.916212	0.935881	0.958424	0.896419	0.902923	0.883667	0.875865	0.872768	0.868505	0.91013	0.910055	0.901419	0.902891	0.892619	0.917144	0.907656	0.914363	0.906118	0.89985	0.912997	0.909092	0.910714	0.907938	0.905788	0.902455	0.903825	0.898367	0.893186	0.893157	0.904759	0.893137	0.89141	0.878202	0.82708	0.904277	0.907177	0.897658	0.905335
WSEA01	Bovismorbificans	B1	0.821642	0.839042	0.927728	0.940071	0.864342	0.850812	0.844817	0.836198	0.86912	0.8369	0.842249	0.861623	0.960004	0.94869	0.931443	0.926416	0.921751	0.934856	0.921606	0.921352	0.910394	0.911861	0.901604	0.926508	0.91742	0.922646	0.915719	0.909794	0.91988	0.918082	0.916444	0.914656	0.915436	0.909934	0.905202	0.90393	0.905497	0.900015	0.910162	0.898273	0.894536	0.890386	0.883017	0.879641	0.87366	0.877136	0.880606
WSEB01	Bovismorbificans	B1	0.866808	0.912667	0.867294	0.885173	0.958269	0.94242	0.935381	0.925691	0.983178	0.944959	0.949942	0.972668	0.89541	0.904072	0.882904	0.889718	0.872107	0.868216	0.90924	0.909324	0.900445	0.901936	0.891615	0.916336	0.906918	0.913487	0.90552	0.899411	0.912073	0.908492	0.90946	0.906657	0.905204	0.901658	0.902686	0.896157	0.892707	0.892721	0.899139	0.887617	0.885797	0.877933	0.826427	0.904411	0.909424	0.897262	0.904713
WSEC01	Bovismorbificans	B1	0.859871	0.905892	0.861901	0.87834	0.950521	0.934579	0.927697	0.918104	0.973287	0.934856	0.941828	0.964444	0.888472	0.896785	0.882713	0.887486	0.871745	0.860745	0.902031	0.901923	0.89339	0.894862	0.891416	0.908894	0.905817	0.906176	0.905088	0.89878	0.911538	0.907913	0.909033	0.906294	0.904661	0.901365	0.902488	0.895745	0.885603	0.885562	0.893801	0.882584	0.881042	0.870941	0.824838	0.897275	0.911359	0.890381	0.8978
WSED01	Bovismorbificans	B1	0.862583	0.92787	0.868081	0.886094	0.962561	0.946982	0.939977	0.930522	0.952913	0.916312	0.935969	0.958472	0.896883	0.902884	0.883732	0.87588	0.872788	0.868605	0.910085	0.909973	0.901506	0.902964	0.892636	0.917107	0.907558	0.914383	0.906094	0.899796	0.913062	0.909022	0.910773	0.908029	0.905702	0.902426	0.903861	0.898316	0.893148	0.893166	0.90468	0.893096	0.89146	0.878147	0.827145	0.904397	0.907271	0.897763	0.905386
WSEE01	Bovismorbificans	B1	0.863077	0.92839	0.868614	0.886503	0.962891	0.947275	0.940135	0.930789	0.953376	0.916539	0.936155	0.958787	0.897261	0.903396	0.88405	0.876327	0.8732	0.868844	0.910635	0.910572	0.901843	0.903347	0.892968	0.917637	0.908079	0.914853	0.90662	0.900309	0.913453	0.909589	0.911173	0.908342	0.906232	0.902805	0.904317	0.898753	0.893649	0.89362	0.905242	0.893687	0.892007	0.878665	0.827496	0.904742	0.907629	0.898198	0.905634
WSEF01	Bovismorbificans	B1	0.863325	0.928544	0.868856	0.886748	0.963284	0.947712	0.940648	0.931305	0.953708	0.916921	0.936548	0.959272	0.897526	0.903667	0.884396	0.876562	0.873435	0.869185	0.910874	0.910774	0.902156	0.903707	0.893364	0.917893	0.908336	0.915129	0.906864	0.900571	0.913826	0.909855	0.9115	0.908729	0.906502	0.90313	0.904621	0.899066	0.893846	0.893857	0.905489	0.893912	0.892312	0.878894	0.827758	0.905116	0.907924	0.898535	0.906026
WSEG01	Bovismorbificans	B1	0.8476	0.907363	0.850267	0.865774	0.936291	0.920511	0.913819	0.904284	0.958684	0.920892	0.927276	0.94962	0.875877	0.883946	0.870317	0.875062	0.859869	0.849004	0.888802	0.888668	0.880442	0.88992	0.87873	0.895399	0.892463	0.895311	0.894384	0.888215	0.898234	0.894624	0.895806	0.893146	0.893769	0.890596	0.889732	0.885286	0.880081	0.875094	0.887644	0.876608	0.877889	0.860959	0.814785	0.891908	0.897901	0.885037	0.893941
WSEH01	Bovismorbificans	B1	0.828028	0.847068	0.85912	0.882573	0.872061	0.858324	0.851851	0.843301	0.866872	0.834449	0.851206	0.871194	0.886588	0.892268	0.875796	0.869638	0.866084	0.860951	0.908151	0.908266	0.899303	0.908157	0.889594	0.908255	0.899388	0.907953	0.900615	0.894636	0.903764	0.900799	0.900305	0.898187	0.900157	0.89589	0.893242	0.894891	0.905409	0.886288	0.891945	0.880984	0.881413	0.877685	0.820423	0.907042	0.891764	0.952306	0.940788
WSEI01	Bovismorbificans	B1	0.8519	0.908535	0.858164	0.872919	0.94495	0.929578	0.922764	0.913453	0.946854	0.909885	0.918344	0.94062	0.883683	0.887016	0.875388	0.877581	0.86469	0.857866	0.896568	0.896463	0.887897	0.889324	0.883957	0.903293	0.899907	0.900666	0.897538	0.89134	0.903877	0.900301	0.901625	0.898796	0.897199	0.89369	0.895133	0.888453	0.880369	0.88025	0.887807	0.876744	0.875129	0.865766	0.821836	0.891028	0.898092	0.881941	0.889171
WSEJ01	Bovismorbificans	B1	0.841489	0.897695	0.838917	0.855111	0.927514	0.912287	0.90549	0.896392	0.927222	0.890749	0.898967	0.920681	0.864844	0.869414	0.862041	0.864264	0.852034	0.83909	0.878367	0.878324	0.870223	0.871573	0.867141	0.883507	0.87907	0.881044	0.878711	0.872648	0.884872	0.881323	0.882675	0.880035	0.878354	0.875151	0.876431	0.872431	0.862818	0.860498	0.873404	0.862727	0.865996	0.853903	0.803037	0.870043	0.878142	0.864832	0.870808
WSBH01	Bovismorbificans	B1	0.846178	0.863187	0.95766	0.969677	0.891392	0.877152	0.870826	0.862233	0.885584	0.852884	0.869385	0.889391	0.991883	0.980142	0.961109	0.955407	0.950774	0.956448	0.949825	0.949675	0.937941	0.939587	0.928778	0.957099	0.947421	0.953107	0.945673	0.939192	0.949953	0.948087	0.946365	0.944376	0.945239	0.939344	0.934601	0.931449	0.932665	0.92929	0.939672	0.927124	0.922723	0.91655	0.909953	0.906319	0.901677	0.893263	0.900611
WSBI01	Bovismorbificans	B1	0.867455	0.913303	0.867831	0.885844	0.958945	0.942991	0.936114	0.926492	0.983979	0.945612	0.950613	0.973533	0.895824	0.904606	0.883376	0.890099	0.872495	0.867866	0.90975	0.909757	0.900935	0.902413	0.892123	0.916825	0.90744	0.91409	0.906013	0.89976	0.912545	0.908927	0.909966	0.907224	0.90561	0.902146	0.903219	0.896765	0.89311	0.893263	0.8996	0.88807	0.8863	0.878291	0.826854	0.905063	0.910237	0.89806	0.905601
WSBJ01	Bovismorbificans	B1	0.846175	0.899634	0.852313	0.869187	0.976088	0.960334	0.952858	0.943244	0.931897	0.89669	0.915043	0.936824	0.879482	0.884834	0.867305	0.860376	0.856949	0.852632	0.89272	0.892717	0.884002	0.885632	0.875494	0.899406	0.890543	0.896805	0.888965	0.882912	0.895052	0.891736	0.89266	0.890211	0.888594	0.885068	0.886155	0.880031	0.876563	0.875706	0.882884	0.871739	0.870172	0.862603	0.812871	0.884416	0.886619	0.8781	0.885184
WSBK01	Bovismorbificans	B1	0.858731	0.914426	0.864616	0.881929	0.993217	0.976485	0.968859	0.958996	0.94764	0.910908	0.930108	0.952512	0.892538	0.897975	0.879873	0.872886	0.869409	0.864777	0.906167	0.906172	0.897023	0.89867	0.888275	0.913027	0.903887	0.910287	0.902277	0.896081	0.908443	0.905146	0.906055	0.903441	0.901891	0.898153	0.899346	0.8932	0.889469	0.888788	0.896046	0.88457	0.88292	0.875237	0.823989	0.897619	0.900178	0.891195	0.898465
WSBL01	Bovismorbificans	B1	0.85808	0.913573	0.863994	0.881374	0.992532	0.975904	0.9683	0.958457	0.946874	0.910374	0.929503	0.951682	0.891845	0.897168	0.879224	0.872124	0.868687	0.864168	0.905379	0.905314	0.896359	0.898023	0.887617	0.912253	0.903131	0.909535	0.901495	0.895328	0.907716	0.904235	0.905311	0.9027	0.901001	0.897522	0.898619	0.892311	0.888685	0.88804	0.895261	0.883793	0.882154	0.874467	0.823384	0.896993	0.899359	0.890544	0.897952
WSBN01	Bovismorbificans	B1	0.85899	0.914501	0.864801	0.88212	0.993714	0.976774	0.969043	0.959216	0.948116	0.911489	0.930427	0.95278	0.892813	0.89805	0.880171	0.873032	0.869531	0.865063	0.906322	0.906242	0.897274	0.89893	0.888602	0.913129	0.90399	0.910383	0.902424	0.89617	0.908762	0.905266	0.906341	0.90377	0.901999	0.898328	0.899709	0.893244	0.889566	0.888972	0.896155	0.884746	0.883314	0.875313	0.824178	0.89791	0.900246	0.891472	0.898668
WSBO01	Bovismorbificans	B1	0.856939	0.912399	0.862713	0.880156	0.991264	0.974466	0.966855	0.957101	0.945714	0.909662	0.928481	0.950621	0.890734	0.895911	0.878104	0.870911	0.867443	0.863149	0.904062	0.904079	0.89515	0.896803	0.8865	0.910908	0.901808	0.908209	0.900168	0.894119	0.906563	0.903047	0.904189	0.901643	0.899849	0.896237	0.897495	0.891074	0.887425	0.886992	0.894002	0.882555	0.881176	0.87324	0.822356	0.895802	0.898146	0.889338	0.896685
WSBP01	Bovismorbificans	B1	0.858803	0.914245	0.864493	0.881963	0.993466	0.976516	0.968974	0.959082	0.947896	0.911473	0.93026	0.952622	0.892633	0.897909	0.879952	0.872796	0.869325	0.864872	0.90608	0.906121	0.897049	0.898719	0.888361	0.912966	0.903837	0.910124	0.902144	0.89597	0.908517	0.905068	0.906102	0.903583	0.901811	0.898159	0.899419	0.893066	0.889399	0.888707	0.895917	0.884466	0.88301	0.875104	0.823991	0.897743	0.900149	0.891275	0.898565
WSBQ01	Bovismorbificans	B1	0.859547	0.915045	0.865318	0.882597	0.994315	0.977308	0.969681	0.959789	0.948767	0.912069	0.931042	0.953352	0.893418	0.898626	0.880733	0.873557	0.870103	0.86563	0.906965	0.906849	0.897871	0.899432	0.889144	0.913745	0.904654	0.911009	0.903022	0.896778	0.909268	0.905831	0.90688	0.904295	0.902607	0.899019	0.900305	0.893794	0.890211	0.889514	0.896734	0.885431	0.883832	0.875891	0.824636	0.898499	0.900879	0.892085	0.899263
WSBR01	Bovismorbificans	B1	0.858713	0.914084	0.864354	0.881729	0.993356	0.976722	0.968862	0.959121	0.947798	0.911446	0.930272	0.952514	0.892475	0.897651	0.879856	0.872628	0.869131	0.865043	0.90588	0.905826	0.896927	0.898549	0.888235	0.912679	0.903568	0.910056	0.901987	0.895768	0.908396	0.904804	0.905981	0.903401	0.90156	0.897885	0.899314	0.892833	0.88913	0.888735	0.895725	0.884334	0.882961	0.87487	0.823875	0.897627	0.900011	0.891232	0.898399
WSBS01	Bovismorbificans	B1	0.858897	0.914215	0.864706	0.881982	0.993442	0.976608	0.968855	0.959018	0.947952	0.911521	0.930298	0.952641	0.892708	0.897778	0.880006	0.872809	0.869329	0.864972	0.906097	0.90597	0.897078	0.898662	0.888405	0.912871	0.90381	0.910252	0.902202	0.895944	0.908523	0.90494	0.90608	0.903526	0.901747	0.898138	0.899528	0.893083	0.88933	0.888741	0.895886	0.884535	0.883086	0.875044	0.823976	0.897707	0.900044	0.891365	0.898636
WSBT01	Bovismorbificans	B1	0.856253	0.911166	0.861985	0.879412	0.990212	0.973597	0.966739	0.95668	0.945232	0.909639	0.928035	0.949947	0.889845	0.895129	0.877442	0.870328	0.866608	0.862442	0.903215	0.903103	0.894447	0.896075	0.88578	0.910022	0.900966	0.907322	0.899361	0.893323	0.905762	0.90206	0.903395	0.900929	0.898829	0.895545	0.896816	0.890227	0.886482	0.886116	0.893165	0.881837	0.880437	0.872402	0.821663	0.895117	0.897371	0.888711	0.896012
WSBU01	Bovismorbificans	B1	0.856409	0.911639	0.86221	0.879397	0.99041	0.973554	0.965893	0.956151	0.945043	0.908687	0.927407	0.949735	0.890109	0.895264	0.877464	0.87037	0.866897	0.862452	0.903453	0.903383	0.89445	0.89608	0.885824	0.910215	0.901147	0.907547	0.899551	0.893381	0.905847	0.90238	0.90345	0.900884	0.899153	0.895515	0.896846	0.890462	0.886805	0.886163	0.89334	0.882014	0.880569	0.872609	0.821805	0.895121	0.897433	0.888726	0.895971
WSBV01	Bovismorbificans	B1	0.858346	0.913763	0.8641	0.881602	0.992925	0.976098	0.968526	0.958685	0.947386	0.911125	0.92999	0.952225	0.892215	0.897401	0.879559	0.872339	0.868887	0.864553	0.905593	0.905546	0.896672	0.898294	0.88798	0.912385	0.903286	0.909671	0.901708	0.895475	0.908068	0.904524	0.905675	0.903137	0.901291	0.897692	0.899002	0.89263	0.888908	0.888271	0.895424	0.884009	0.882582	0.874626	0.823624	0.897248	0.899641	0.890829	0.898258
WSBW01	Bovismorbificans	B1	0.859447	0.914883	0.865205	0.882579	0.994316	0.977447	0.969877	0.960078	0.948757	0.9122	0.931133	0.953454	0.893361	0.898572	0.880665	0.873427	0.869932	0.865514	0.906761	0.906712	0.897777	0.899438	0.889104	0.913603	0.904453	0.910869	0.902843	0.896629	0.909287	0.905712	0.906854	0.904283	0.902484	0.898847	0.900213	0.893733	0.890006	0.889409	0.896653	0.8852	0.883805	0.875725	0.824617	0.898497	0.900799	0.892084	0.899281
WSBX01	Bovismorbificans	B1	0.859274	0.914768	0.865218	0.882361	0.993987	0.977247	0.969521	0.959711	0.94837	0.911542	0.930647	0.953007	0.893025	0.898453	0.880367	0.873311	0.869807	0.865278	0.906608	0.906544	0.897465	0.899104	0.888709	0.913444	0.9044	0.910791	0.902726	0.896503	0.908854	0.905493	0.90644	0.903899	0.902281	0.898613	0.899834	0.893459	0.88984	0.889282	0.896522	0.885131	0.8834	0.875626	0.824397	0.89827	0.900598	0.891875	0.899133
WSBY01	Bovismorbificans	B1	0.858901	0.914324	0.864783	0.882196	0.993629	0.976764	0.969112	0.95921	0.948112	0.911556	0.930552	0.952779	0.892939	0.897934	0.880117	0.873013	0.869512	0.865033	0.906321	0.906199	0.89721	0.898805	0.888511	0.913085	0.904024	0.910321	0.90242	0.896118	0.908621	0.905178	0.906209	0.903649	0.90197	0.898262	0.899635	0.893414	0.889649	0.888975	0.896107	0.884751	0.883189	0.875256	0.82409	0.897847	0.900214	0.89146	0.898703
WSBZ01	Bovismorbificans	B1	0.859688	0.91519	0.865436	0.882838	0.994448	0.977602	0.969984	0.960093	0.948856	0.912387	0.931233	0.953569	0.893524	0.898752	0.880833	0.873674	0.87016	0.865701	0.907004	0.906984	0.897951	0.899604	0.889254	0.913858	0.904724	0.911118	0.903083	0.896868	0.909447	0.905963	0.907042	0.904438	0.902708	0.89902	0.90037	0.893974	0.890223	0.889624	0.896875	0.885441	0.883983	0.875978	0.824772	0.898648	0.90101	0.89224	0.899432
WSCA01	Bovismorbificans	B1	0.856599	0.912123	0.862561	0.879789	0.990638	0.973955	0.966317	0.956566	0.945274	0.908671	0.92776	0.950086	0.890338	0.895713	0.877754	0.870775	0.867328	0.862743	0.903914	0.903881	0.89482	0.896458	0.886151	0.910749	0.901645	0.907954	0.900056	0.893848	0.906202	0.902899	0.903815	0.901221	0.899643	0.895956	0.897123	0.890966	0.88731	0.886616	0.893802	0.882374	0.880721	0.873086	0.822077	0.895326	0.89787	0.888937	0.896302
WSCB01	Bovismorbificans	B1	0.853842	0.914587	0.856359	0.872515	0.943493	0.927667	0.920884	0.911288	0.965957	0.927831	0.934663	0.957157	0.882505	0.890423	0.876964	0.881733	0.866107	0.855286	0.895823	0.895716	0.887353	0.903962	0.885513	0.902527	0.899524	0.902073	0.901033	0.894858	0.905361	0.901727	0.902881	0.900165	0.900447	0.897226	0.896699	0.889746	0.886488	0.8814	0.88778	0.876692	0.877742	0.867245	0.820221	0.898307	0.904715	0.891419	0.899592
WSCC01	Bovismorbificans	B1	0.859274	0.914832	0.865114	0.882295	0.993893	0.977115	0.969427	0.959777	0.948322	0.911492	0.930675	0.953128	0.892997	0.898535	0.880391	0.873335	0.869836	0.865224	0.906647	0.906583	0.897531	0.899198	0.888832	0.913502	0.904384	0.910796	0.902762	0.896513	0.908951	0.905596	0.906551	0.903912	0.902319	0.898633	0.899912	0.893594	0.889934	0.889309	0.896499	0.885108	0.883477	0.875613	0.824366	0.89829	0.900675	0.891784	0.89912
WSCD01	Bovismorbificans	B1	0.853743	0.914149	0.855775	0.871855	0.943332	0.927615	0.920751	0.911238	0.965729	0.92778	0.934495	0.957086	0.881971	0.890041	0.876525	0.88115	0.865494	0.854831	0.895155	0.895077	0.886878	0.903517	0.885093	0.901876	0.898862	0.901595	0.900388	0.894237	0.904947	0.901089	0.902412	0.899748	0.899807	0.896609	0.896179	0.889093	0.885854	0.880986	0.887138	0.876043	0.877284	0.866626	0.819837	0.898237	0.904538	0.891297	0.899415
WSCE01	Bovismorbificans	B1	0.863286	0.928592	0.868897	0.886754	0.963213	0.947558	0.94035	0.931019	0.953745	0.916742	0.936404	0.959108	0.897464	0.903663	0.884305	0.876622	0.873472	0.869166	0.910918	0.910784	0.902154	0.903638	0.893229	0.917884	0.908403	0.915168	0.906904	0.900551	0.913696	0.909835	0.911438	0.908595	0.90654	0.903131	0.9046	0.89907	0.893902	0.893907	0.905485	0.893989	0.892232	0.878925	0.827723	0.905039	0.90791	0.898505	0.905981
WSCF01	Bovismorbificans	B1	0.851231	0.89626	0.866231	0.869231	0.938659	0.922935	0.916195	0.906637	0.962919	0.925009	0.929733	0.952172	0.879212	0.886091	0.873458	0.880233	0.862835	0.851946	0.892399	0.892447	0.883877	0.885348	0.881957	0.899181	0.896221	0.896506	0.895418	0.889409	0.901699	0.898299	0.899233	0.896525	0.895159	0.891756	0.892786	0.886395	0.876443	0.876248	0.884532	0.873525	0.871916	0.862127	0.829054	0.887536	0.900216	0.879778	0.887175
WSCG01	Bovismorbificans	B1	0.862354	0.927931	0.867944	0.885926	0.962167	0.946587	0.939568	0.930253	0.952639	0.916138	0.935659	0.9581	0.896498	0.902729	0.883448	0.875702	0.872586	0.868444	0.909972	0.909895	0.901223	0.902761	0.892388	0.917027	0.90745	0.914162	0.905924	0.899747	0.912881	0.908905	0.910524	0.90781	0.905589	0.902323	0.903583	0.898208	0.893028	0.893205	0.904555	0.89298	0.891286	0.878049	0.826896	0.904059	0.906994	0.897468	0.905065
WSCH01	Bovismorbificans	B1	0.842761	0.859253	0.95271	0.963744	0.887155	0.87367	0.867132	0.858479	0.88166	0.849635	0.865887	0.885614	0.986077	0.97579	0.956299	0.950327	0.945719	0.952004	0.944416	0.944576	0.933179	0.934764	0.924088	0.951705	0.942247	0.948018	0.940354	0.934343	0.944893	0.943162	0.941549	0.939521	0.940118	0.93449	0.929859	0.92576	0.927252	0.925117	0.934441	0.922314	0.918047	0.911569	0.905655	0.902576	0.897766	0.88946	0.896842
WSCI01	Bovismorbificans	B1	0.852533	0.913118	0.854737	0.870744	0.941928	0.926184	0.919449	0.909918	0.964395	0.926722	0.933163	0.955645	0.880804	0.888954	0.875291	0.880109	0.864523	0.853798	0.89416	0.89402	0.885692	0.902295	0.883835	0.900847	0.897829	0.90034	0.89938	0.893204	0.903605	0.900023	0.901185	0.89845	0.898777	0.895514	0.895033	0.888048	0.884884	0.880567	0.886068	0.875001	0.876033	0.8656	0.818785	0.897018	0.90338	0.89008	0.898166
WSCJ01	Bovismorbificans	B1	0.827821	0.842036	0.891521	0.909806	0.865977	0.852415	0.84643	0.838139	0.860696	0.829763	0.845694	0.865086	0.920445	0.929438	0.92845	0.921378	0.91746	0.891864	0.895645	0.895442	0.887062	0.898771	0.878037	0.902057	0.893262	0.902114	0.89479	0.889015	0.897862	0.8945	0.894423	0.892346	0.894229	0.890437	0.887385	0.883001	0.889371	0.881928	0.885905	0.875	0.892664	0.88596	0.850653	0.903274	0.888307	0.920804	0.929164
WSCK01	Bovismorbificans	B1	0.865472	0.911286	0.865767	0.883719	0.956605	0.940755	0.934044	0.924385	0.982085	0.94387	0.948852	0.971647	0.893799	0.902325	0.881416	0.887958	0.870491	0.865923	0.907561	0.907437	0.898913	0.900345	0.890149	0.914452	0.905143	0.911779	0.903805	0.897585	0.910491	0.906616	0.908016	0.905164	0.903306	0.900162	0.901394	0.894463	0.890822	0.891443	0.897403	0.886016	0.884413	0.876121	0.825118	0.90307	0.908101	0.896252	0.903544
WSCL01	Bovismorbificans	B1	0.862556	0.927239	0.868282	0.886196	0.962503	0.947026	0.939876	0.93045	0.952897	0.916287	0.936041	0.958595	0.896861	0.902997	0.883681	0.875982	0.872838	0.868606	0.910265	0.910115	0.90147	0.902868	0.89258	0.91717	0.90772	0.91446	0.906292	0.89988	0.913025	0.909159	0.910719	0.907932	0.905862	0.902458	0.903898	0.898392	0.893305	0.893401	0.904838	0.893314	0.891558	0.878254	0.827262	0.9045	0.907265	0.89792	0.905499
WSCM01	Bovismorbificans	B1	0.861004	0.925484	0.866382	0.884481	0.960445	0.94509	0.937918	0.928621	0.950891	0.914556	0.934384	0.956679	0.894695	0.901167	0.881745	0.87417	0.871093	0.866783	0.908412	0.908292	0.899597	0.901163	0.890794	0.915307	0.905803	0.912532	0.904413	0.898117	0.911155	0.907312	0.908879	0.906039	0.903959	0.900588	0.902034	0.896583	0.891475	0.891745	0.902983	0.891379	0.889693	0.876503	0.825562	0.902704	0.905454	0.896104	0.903543
WSCN01	Bovismorbificans	B1	0.858603	0.912965	0.864431	0.881581	0.991537	0.974904	0.967036	0.957428	0.946206	0.909983	0.928769	0.951073	0.892357	0.897802	0.879511	0.872572	0.869084	0.864542	0.905897	0.905843	0.896665	0.898366	0.887954	0.912745	0.903617	0.910069	0.902018	0.895769	0.908141	0.904871	0.905688	0.903079	0.901597	0.897792	0.899042	0.892819	0.88917	0.888717	0.895766	0.884321	0.882655	0.874913	0.823646	0.897436	0.899905	0.891063	0.898419
WSCO01	Bovismorbificans	B1	0.858269	0.912634	0.864186	0.881529	0.991234	0.974741	0.967035	0.957343	0.946156	0.90965	0.92864	0.950956	0.892033	0.897379	0.879483	0.872382	0.868925	0.86443	0.905635	0.905534	0.896612	0.898232	0.887921	0.912429	0.903385	0.90973	0.901787	0.895453	0.907973	0.90453	0.905569	0.903041	0.901347	0.897733	0.898931	0.89255	0.888945	0.888314	0.895426	0.884014	0.882498	0.874612	0.823639	0.897254	0.899611	0.890849	0.898122
WSCP01	Bovismorbificans	B1	0.859526	0.914117	0.865282	0.882518	0.992595	0.97593	0.968095	0.958347	0.947285	0.91066	0.929535	0.951922	0.89318	0.898637	0.880479	0.873465	0.869974	0.865401	0.906789	0.906722	0.897605	0.899279	0.888889	0.913621	0.904474	0.910913	0.902891	0.896651	0.909141	0.905711	0.906656	0.904027	0.902455	0.898704	0.900004	0.893744	0.890039	0.889398	0.896622	0.885179	0.883655	0.875741	0.824496	0.898502	0.900991	0.892104	0.899293
WSCQ01	Bovismorbificans	B1	0.860264	0.914756	0.866128	0.883327	0.993514	0.976829	0.968972	0.959248	0.948219	0.911561	0.930442	0.952803	0.894011	0.899493	0.881214	0.874281	0.870772	0.86617	0.907659	0.907539	0.898418	0.900141	0.889739	0.914493	0.905344	0.911785	0.903779	0.897466	0.909963	0.906585	0.907549	0.904896	0.903294	0.899568	0.900882	0.89452	0.89086	0.890262	0.89747	0.88601	0.884388	0.876536	0.825273	0.899316	0.901693	0.892897	0.90011
WSCR01	Bovismorbificans	B1	0.851173	0.896743	0.854257	0.869321	0.940428	0.924678	0.917884	0.908352	0.982312	0.943094	0.931357	0.953757	0.880233	0.888416	0.873698	0.878483	0.862963	0.853123	0.892512	0.892404	0.884073	0.885544	0.882209	0.899193	0.896433	0.896629	0.895578	0.889387	0.901887	0.898271	0.899468	0.896769	0.895117	0.89195	0.893027	0.886427	0.876411	0.876346	0.88478	0.873776	0.872305	0.862163	0.817909	0.887932	0.901622	0.881204	0.888421
WSCS01	Bovismorbificans	B1	0.86696	0.912574	0.867078	0.885047	0.958334	0.94234	0.935387	0.925852	0.983744	0.945122	0.950426	0.973162	0.895325	0.90387	0.88288	0.889437	0.87189	0.867283	0.909065	0.909044	0.900417	0.901854	0.89159	0.916031	0.906724	0.913453	0.905295	0.899129	0.912068	0.908189	0.909445	0.906699	0.904897	0.90169	0.902725	0.895972	0.892442	0.892555	0.898898	0.887483	0.885816	0.877614	0.826338	0.904553	0.909527	0.897627	0.905019
WSCT01	Bovismorbificans	B1	0.862418	0.926883	0.867992	0.88576	0.962111	0.946755	0.939372	0.930172	0.952595	0.915983	0.935557	0.958311	0.896478	0.902619	0.883253	0.875672	0.872534	0.868291	0.909949	0.909778	0.901106	0.902703	0.892275	0.916843	0.90734	0.914224	0.90598	0.899583	0.91273	0.90884	0.910405	0.907574	0.905488	0.90213	0.903505	0.898038	0.892966	0.893012	0.9045	0.892967	0.891259	0.877953	0.826989	0.904184	0.906923	0.897719	0.905133
WSCU01	Bovismorbificans	B1	0.857926	0.920732	0.862881	0.880568	0.955539	0.94037	0.933198	0.924024	0.946125	0.91007	0.929515	0.951779	0.890828	0.897223	0.878108	0.870442	0.867335	0.863235	0.904487	0.904349	0.895754	0.897236	0.886984	0.911337	0.901947	0.908703	0.900512	0.894185	0.907258	0.90334	0.904952	0.902202	0.900106	0.896718	0.898157	0.892698	0.887629	0.887599	0.899069	0.887639	0.885947	0.872686	0.822079	0.898731	0.901462	0.892289	0.899666
JYUT01	Hindmarsh	B1	0.857081	0.904761	0.860811	0.877184	0.949723	0.933969	0.92686	0.917431	0.974361	0.936103	0.941154	0.963684	0.888478	0.896994	0.874948	0.868138	0.864232	0.860671	0.901101	0.901031	0.89233	0.893669	0.883563	0.907941	0.899019	0.905336	0.897254	0.891122	0.903657	0.900089	0.901033	0.898302	0.89676	0.89344	0.89451	0.888079	0.88452	0.884607	0.891306	0.880117	0.878126	0.870019	0.820266	0.896069	0.901044	0.889388	0.896609
MXFZ01	Hindmarsh	B1	0.855488	0.902701	0.859195	0.875791	0.948008	0.932894	0.925862	0.916263	0.972445	0.934792	0.939853	0.962385	0.886733	0.895084	0.873691	0.866327	0.862539	0.859473	0.899155	0.898999	0.890897	0.892463	0.882368	0.905931	0.896995	0.903499	0.895412	0.889121	0.90253	0.898152	0.899871	0.897043	0.894807	0.89185	0.893339	0.886051	0.882484	0.88269	0.88935	0.878215	0.876796	0.868152	0.819344	0.89479	0.899382	0.88839	0.895751
ERR1755559	Hindmarsh	B1	0.868411	0.916621	0.871213	0.889579	0.962689	0.947231	0.940184	0.930578	0.972026	0.934986	0.955287	0.977854	0.899537	0.908281	0.886926	0.87928	0.875888	0.871327	0.913532	0.913501	0.904812	0.906216	0.895928	0.920688	0.911136	0.917813	0.909639	0.903324	0.916505	0.912491	0.913762	0.911062	0.909083	0.905829	0.906884	0.900243	0.896464	0.896801	0.90332	0.891782	0.889893	0.881726	0.830036	0.908453	0.913648	0.901526	0.9091
SRR1783167	Hindmarsh	B1	0.785513	0.802954	0.792804	0.80557	0.820571	0.807217	0.801726	0.793794	0.821726	0.790891	0.803915	0.822293	0.814424	0.813084	0.810407	0.807129	0.801486	0.79592	0.826938	0.827281	0.819287	0.827457	0.817238	0.832975	0.8312	0.832735	0.831661	0.826932	0.834196	0.832626	0.833096	0.830727	0.831504	0.828127	0.826445	0.821066	0.824015	0.81488	0.830898	0.821115	0.82189	0.804088	0.762757	0.82932	0.830909	0.81762	0.824905
SRR2533413	Hindmarsh	B1	0.845537	0.866586	0.904541	0.932392	0.89119	0.876723	0.870304	0.861795	0.883904	0.85092	0.868395	0.888341	0.934125	0.923318	0.939067	0.933632	0.929512	0.904706	0.963842	0.969987	0.956966	0.957443	0.965065	0.960677	0.957886	0.956544	0.964854	0.958969	0.969351	0.968208	0.965709	0.96365	0.966744	0.958798	0.953572	0.961835	0.948714	0.935642	0.944853	0.932343	0.928571	0.928532	0.864209	0.907505	0.914434	0.900006	0.901359
AAIBEG01	Hindmarsh	B1	0.847171	0.86756	0.905824	0.934062	0.892617	0.878037	0.871642	0.863027	0.885108	0.852129	0.869567	0.889739	0.935417	0.924753	0.94031	0.935077	0.930971	0.905897	0.965316	0.97063	0.958278	0.958777	0.966307	0.961332	0.95847	0.957812	0.96637	0.959836	0.97082	0.969087	0.967046	0.965068	0.967591	0.960028	0.954868	0.963522	0.950039	0.937173	0.945729	0.933062	0.929817	0.929294	0.865388	0.909219	0.915978	0.901757	0.903248
AAADAU01	Hindmarsh*		0.480331	0.468241	0.469654	0.472005	0.478112	0.47323	0.470069	0.466708	0.478553	0.466785	0.470878	0.478454	0.476739	0.47243	0.472388	0.472317	0.469926	0.47384	0.482234	0.482101	0.47853	0.480232	0.474807	0.485028	0.481248	0.490827	0.487577	0.485369	0.483249	0.481814	0.481935	0.480879	0.483852	0.48224	0.479168	0.477278	0.477853	0.488102	0.47811	0.473528	0.477883	0.477238	0.461898	0.474748	0.470352	0.468337	0.471253
VCTV01	Takoradi		0.503582	0.484237	0.483011	0.487363	0.501002	0.496008	0.492783	0.489672	0.499698	0.48752	0.495069	0.503444	0.491367	0.495207	0.485992	0.482392	0.482033	0.479492	0.497223	0.49706	0.493643	0.494349	0.489848	0.500306	0.496218	0.499324	0.495444	0.492982	0.498728	0.497483	0.498086	0.497147	0.495238	0.494199	0.494585	0.49182	0.489867	0.491825	0.492801	0.487821	0.487304	0.483396	0.472594	0.498928	0.500939	0.496113	0.499269
NPMA01	Takoradi		0.506667	0.486471	0.487385	0.492249	0.503445	0.498401	0.495208	0.492098	0.502121	0.489934	0.497433	0.505789	0.496163	0.499985	0.490644	0.486892	0.486511	0.48405	0.501908	0.501683	0.49837	0.499027	0.494493	0.50494	0.500833	0.504053	0.500109	0.497597	0.503457	0.502063	0.50275	0.501899	0.499884	0.498843	0.499291	0.496539	0.494433	0.495975	0.497461	0.492406	0.491931	0.487799	0.476963	0.503436	0.505567	0.500793	0.504031
AAOBOO01	Hindmarsh	B2	0.47158	0.455539	0.45474	0.458593	0.471189	0.466787	0.464008	0.461081	0.469949	0.459273	0.465679	0.4735	0.462177	0.465593	0.457331	0.453869	0.453676	0.451143	0.467544	0.467353	0.464297	0.464957	0.460793	0.470284	0.46656	0.469472	0.465941	0.463547	0.468973	0.467719	0.468472	0.467547	0.465695	0.464709	0.465585	0.462665	0.460724	0.462976	0.463378	0.45883	0.458465	0.45469	0.445975	0.469151	0.470835	0.466526	0.469477
SRR3710239	Bovismorbificans	B2	0.478782	0.462456	0.461428	0.465494	0.478379	0.473973	0.471116	0.468259	0.477138	0.466397	0.473047	0.480837	0.469217	0.47272	0.464158	0.460585	0.460353	0.457958	0.474662	0.474495	0.471314	0.472011	0.467683	0.477509	0.473679	0.476654	0.472999	0.470722	0.47613	0.474833	0.475621	0.474659	0.472763	0.47177	0.472639	0.469608	0.467659	0.470192	0.470418	0.465762	0.465324	0.461481	0.452327	0.476219	0.47811	0.473627	0.476653
AZKS01	Bovismorbificans	B2	0.477927	0.461469	0.460631	0.4647	0.477527	0.473202	0.470346	0.467361	0.476294	0.465512	0.472179	0.480034	0.46829	0.471799	0.46335	0.459751	0.459546	0.457021	0.473784	0.473591	0.470504	0.471162	0.466891	0.476601	0.472808	0.475786	0.472128	0.4697	0.47528	0.473954	0.474755	0.473838	0.471896	0.470904	0.471807	0.468754	0.466765	0.469155	0.469543	0.464881	0.464483	0.46064	0.451581	0.475364	0.477214	0.472747	0.475785
AZKT01	Bovismorbificans	B2	0.47929	0.462732	0.461899	0.465976	0.478888	0.474483	0.471634	0.468686	0.477681	0.466841	0.473467	0.481394	0.469628	0.473145	0.464674	0.461032	0.460821	0.458277	0.47513	0.474943	0.471818	0.472539	0.468186	0.477965	0.474128	0.477152	0.473465	0.471011	0.476679	0.475294	0.47614	0.475155	0.473208	0.472269	0.473191	0.470051	0.468072	0.470483	0.470845	0.466174	0.465794	0.461894	0.452773	0.476728	0.478559	0.474118	0.477159
AZLB01	Bovismorbificans	B2	0.478434	0.461929	0.461094	0.465168	0.478008	0.473624	0.470784	0.467847	0.476808	0.465964	0.472657	0.4805	0.468785	0.472297	0.463856	0.460233	0.460021	0.457475	0.474286	0.474092	0.471005	0.471689	0.467382	0.477117	0.473289	0.476297	0.472619	0.470165	0.475818	0.47444	0.475279	0.474306	0.472383	0.471441	0.472364	0.469238	0.467242	0.469644	0.470019	0.465373	0.464973	0.461087	0.452017	0.475865	0.477726	0.473265	0.476288
AZKP01	Bovismorbificans	B2	0.47837	0.46186	0.461025	0.465115	0.477965	0.473637	0.470799	0.467836	0.476727	0.465944	0.472588	0.480476	0.468707	0.472233	0.463739	0.46015	0.459942	0.45741	0.474194	0.474002	0.470908	0.471596	0.46729	0.477027	0.473202	0.47619	0.472528	0.470095	0.475726	0.474361	0.475209	0.474245	0.472295	0.471328	0.472211	0.469164	0.467147	0.469569	0.469967	0.465284	0.464907	0.461032	0.451974	0.475789	0.477665	0.473208	0.476249
WSCV01	Bovismorbificans	B2	0.477458	0.461019	0.460199	0.464207	0.477063	0.472581	0.469761	0.46685	0.475782	0.464948	0.471553	0.47944	0.467833	0.471361	0.462862	0.459327	0.459114	0.456584	0.473304	0.47311	0.470001	0.470678	0.466404	0.47612	0.472308	0.475289	0.471671	0.469234	0.474797	0.473486	0.474284	0.473326	0.471419	0.470433	0.471333	0.468256	0.466324	0.468702	0.469069	0.464416	0.464026	0.460171	0.451168	0.474891	0.476728	0.472281	0.475284
WSBM01	Bovismorbificans	B2	0.479088	0.462614	0.461551	0.465599	0.478941	0.474453	0.471574	0.468631	0.477255	0.466402	0.473035	0.480966	0.469262	0.472787	0.464259	0.460697	0.460485	0.457914	0.474772	0.474585	0.471426	0.472112	0.467809	0.477605	0.47377	0.476747	0.473125	0.47067	0.476249	0.474958	0.475738	0.474772	0.472882	0.471857	0.472749	0.469716	0.467756	0.470141	0.470484	0.465809	0.465424	0.46155	0.452462	0.476408	0.478214	0.473863	0.476873
SRR3473907	Muenchen**	B2	0.478707	0.462277	0.461394	0.465462	0.478348	0.473912	0.471056	0.468122	0.477125	0.466239	0.47289	0.480827	0.469158	0.472663	0.464145	0.460551	0.460345	0.457804	0.47462	0.47447	0.471322	0.472011	0.467701	0.477499	0.473688	0.476625	0.472973	0.47057	0.476106	0.474853	0.475649	0.474638	0.472782	0.471783	0.472647	0.469602	0.467631	0.469982	0.470403	0.46575	0.465291	0.461477	0.452313	0.476198	0.478075	0.473599	0.476622
SRR1614889	Muenchen**	B2	0.478269	0.461822	0.460901	0.464922	0.477789	0.473376	0.470497	0.467526	0.476522	0.465693	0.47229	0.480226	0.468685	0.472125	0.463647	0.460081	0.459855	0.457307	0.474089	0.473906	0.470761	0.471424	0.467197	0.476922	0.4733	0.476164	0.472566	0.470188	0.47558	0.474315	0.475083	0.474114	0.472303	0.471329	0.472121	0.469084	0.467088	0.46955	0.469842	0.465191	0.464844	0.461031	0.451947	0.475635	0.477716	0.473026	0.476049
QDND01	Bovismorbificans	B2	0.476666	0.460344	0.459459	0.463459	0.476277	0.471832	0.468969	0.466049	0.47499	0.464178	0.470755	0.478635	0.467138	0.470602	0.462139	0.458616	0.458423	0.455867	0.472563	0.47237	0.469259	0.469933	0.465648	0.475361	0.471565	0.474548	0.47091	0.468501	0.474022	0.472718	0.473557	0.472551	0.470665	0.469696	0.470576	0.467598	0.465589	0.46801	0.468382	0.463763	0.463355	0.459451	0.450478	0.474083	0.47594	0.471501	0.474503
SRR6440236	Bovismorbificans	B2	0.475898	0.4599	0.458757	0.46273	0.475495	0.471037	0.468231	0.465285	0.474338	0.463464	0.469982	0.47788	0.466369	0.469859	0.461525	0.458016	0.457817	0.455236	0.471859	0.471626	0.468523	0.469377	0.46506	0.474624	0.470826	0.473853	0.470379	0.467902	0.473351	0.472061	0.472842	0.471905	0.470094	0.469109	0.473345	0.466884	0.465046	0.467338	0.467643	0.463036	0.462844	0.458835	0.449843	0.477001	0.475296	0.470872	0.473878
AZKV01	Bovismorbificans	B2	0.478881	0.462386	0.461553	0.465639	0.478508	0.474101	0.47127	0.468335	0.477322	0.466482	0.473122	0.481018	0.46924	0.472769	0.46432	0.460676	0.46047	0.457925	0.474758	0.474572	0.471455	0.472169	0.467854	0.477595	0.473756	0.476776	0.473098	0.470644	0.476326	0.474925	0.475745	0.474805	0.47286	0.471896	0.472836	0.469697	0.467711	0.470136	0.470476	0.46582	0.465423	0.461539	0.452441	0.476347	0.478201	0.473726	0.47678
AZKU01	Bovismorbificans	B2	0.476359	0.459985	0.459183	0.463182	0.475945	0.471553	0.468754	0.465791	0.474765	0.463983	0.470553	0.478381	0.466781	0.470262	0.461895	0.458293	0.458092	0.455551	0.472235	0.472028	0.468943	0.469683	0.465363	0.475018	0.471222	0.474205	0.470597	0.468169	0.473765	0.472407	0.473224	0.472266	0.470339	0.469387	0.470307	0.467219	0.465264	0.467619	0.46801	0.463376	0.463015	0.459141	0.450182	0.47381	0.475615	0.471224	0.474234
AZKR01	Bovismorbificans	B2	0.472487	0.456359	0.45555	0.459498	0.472083	0.467916	0.465128	0.462149	0.470865	0.460302	0.466773	0.47464	0.463005	0.46645	0.458202	0.454669	0.454497	0.45198	0.468402	0.468216	0.465236	0.46584	0.461683	0.471155	0.467397	0.470368	0.466772	0.464384	0.469904	0.468567	0.469381	0.468456	0.466533	0.465596	0.466485	0.463501	0.461546	0.463813	0.464241	0.45967	0.459302	0.455524	0.446757	0.469951	0.471785	0.467407	0.470412
SRR1556930	Bovismorbificans	B2	0.47631	0.459802	0.459122	0.463044	0.47557	0.471128	0.468264	0.46532	0.473281	0.462486	0.468994	0.476898	0.466782	0.470026	0.461774	0.458302	0.458096	0.455498	0.472222	0.472001	0.468838	0.469515	0.465289	0.474999	0.47119	0.474161	0.470563	0.46811	0.473604	0.47236	0.473076	0.472135	0.470294	0.469268	0.470143	0.4672	0.465294	0.467586	0.467988	0.463376	0.462906	0.459156	0.450141	0.473877	0.474183	0.474762	0.477761
SRR5173496	Bovismorbificans	B2	0.468886	0.453323	0.45224	0.45602	0.46846	0.46422	0.461453	0.458514	0.467439	0.456696	0.463086	0.470777	0.4596	0.462958	0.454893	0.451365	0.451257	0.448759	0.464887	0.464688	0.461782	0.462521	0.458356	0.467582	0.464029	0.46676	0.4633	0.460993	0.466432	0.465042	0.465953	0.46505	0.463016	0.46219	0.463104	0.460017	0.458114	0.460356	0.460788	0.456327	0.456009	0.452212	0.443738	0.466469	0.468188	0.463995	0.466901
SRR5584552	Bovismorbificans	B2	0.47887	0.46406	0.463418	0.467091	0.475938	0.47147	0.468664	0.465785	0.473408	0.462545	0.469117	0.477004	0.471152	0.470681	0.465954	0.462581	0.46233	0.459498	0.476612	0.476434	0.473038	0.473692	0.469439	0.479492	0.475631	0.478447	0.474966	0.472484	0.477898	0.476644	0.477363	0.476336	0.474718	0.473505	0.474416	0.471582	0.469624	0.472067	0.47239	0.467599	0.467058	0.463382	0.454204	0.477804	0.473653	0.470415	0.473383
SRR6345507	Bovismorbificans	B2	0.477982	0.461573	0.460689	0.464725	0.477583	0.473099	0.470256	0.467289	0.476291	0.465419	0.472057	0.479976	0.468425	0.471939	0.463393	0.459864	0.459646	0.457073	0.473896	0.473731	0.470524	0.47121	0.466909	0.476735	0.472912	0.475838	0.472248	0.469798	0.475326	0.474076	0.47482	0.473858	0.472024	0.470976	0.471844	0.468837	0.466933	0.469272	0.469638	0.464973	0.464565	0.460729	0.451646	0.475414	0.477356	0.472815	0.47582
SRR1646561	Bovismorbificans	B2	0.477829	0.461454	0.46057	0.464616	0.477484	0.473157	0.470333	0.467381	0.476223	0.465539	0.47219	0.479993	0.468291	0.471804	0.463282	0.4597	0.459485	0.456977	0.473731	0.473583	0.470418	0.471122	0.466807	0.476609	0.472802	0.475728	0.472058	0.469693	0.475221	0.473921	0.474737	0.473757	0.471862	0.470873	0.471742	0.468712	0.466739	0.469209	0.469521	0.464875	0.464422	0.460607	0.451479	0.475304	0.477208	0.472683	0.475747
SRR1646518	Bovismorbificans	B2	0.477664	0.461295	0.460434	0.464453	0.477281	0.472841	0.469991	0.467025	0.476016	0.46517	0.471786	0.479708	0.468147	0.471649	0.463142	0.459589	0.459362	0.456822	0.473618	0.47343	0.470282	0.470955	0.466676	0.476443	0.472624	0.475562	0.471936	0.469566	0.475059	0.473782	0.474556	0.473597	0.471713	0.470752	0.471602	0.468571	0.466624	0.468995	0.469371	0.464734	0.464289	0.460472	0.451436	0.475148	0.477009	0.472556	0.475549
SRR4273698	Bovismorbificans	B2	0.477416	0.461072	0.460191	0.464206	0.477034	0.47263	0.469793	0.466874	0.47587	0.465011	0.471585	0.479528	0.4679	0.471418	0.462903	0.459325	0.459107	0.456718	0.47351	0.473187	0.470093	0.470793	0.466625	0.476232	0.472385	0.475307	0.47175	0.470279	0.474796	0.473582	0.474288	0.473453	0.471463	0.470574	0.47154	0.468278	0.46636	0.468736	0.469155	0.464468	0.464118	0.460239	0.451143	0.474989	0.476805	0.472313	0.475425
SRR2981147	Bovismorbificans	B2	0.476888	0.460753	0.4614	0.463648	0.476651	0.472185	0.469368	0.466377	0.475978	0.465129	0.470999	0.478863	0.469114	0.472648	0.462451	0.458852	0.458615	0.457782	0.472761	0.472634	0.469458	0.470198	0.465875	0.475652	0.472071	0.47475	0.471162	0.468774	0.474273	0.473026	0.473778	0.472807	0.470935	0.469931	0.470844	0.46777	0.465855	0.468186	0.468774	0.464133	0.463719	0.459738	0.452329	0.474394	0.476922	0.4718	0.474796
SRR1646562	Bovismorbificans	B2	0.477081	0.460879	0.459962	0.464063	0.476728	0.4723	0.469444	0.46649	0.475466	0.464642	0.471222	0.47914	0.467663	0.471045	0.462663	0.459122	0.458898	0.456355	0.473195	0.473038	0.469892	0.470571	0.466267	0.475932	0.47213	0.475067	0.471436	0.469059	0.474554	0.473274	0.474042	0.473089	0.47121	0.470244	0.471101	0.46817	0.466237	0.46849	0.468871	0.464257	0.463807	0.460114	0.450993	0.474634	0.476398	0.472061	0.474933
SRR4044967	Bovismorbificans	B2	0.476622	0.460386	0.460578	0.463464	0.476256	0.471942	0.469101	0.466165	0.475136	0.464341	0.470876	0.478708	0.468221	0.471738	0.462239	0.458673	0.458451	0.456977	0.472574	0.472385	0.469319	0.469998	0.465765	0.475381	0.471626	0.47455	0.470988	0.468569	0.474109	0.472797	0.473609	0.472664	0.470684	0.469776	0.470655	0.467577	0.465597	0.46799	0.468409	0.463829	0.463438	0.459528	0.451546	0.474161	0.476651	0.47161	0.47459
SRR4039933	Bovismorbificans	B2	0.476657	0.460314	0.459411	0.463444	0.476245	0.471799	0.469002	0.466043	0.474994	0.464172	0.470757	0.478634	0.467107	0.470599	0.462142	0.458607	0.458391	0.455839	0.472551	0.472362	0.469247	0.469923	0.465664	0.47537	0.471564	0.474526	0.470904	0.468503	0.47401	0.47272	0.473512	0.472547	0.470662	0.469696	0.47056	0.467531	0.465594	0.46795	0.468321	0.463726	0.463291	0.459463	0.450413	0.474106	0.475943	0.47151	0.474502
SRR6345264	Bovismorbificans	B2	0.475361	0.45917	0.458343	0.462229	0.47496	0.4705	0.467674	0.464726	0.473709	0.462839	0.469432	0.477305	0.465889	0.469367	0.461009	0.457511	0.457299	0.454648	0.47131	0.471166	0.468003	0.468683	0.464507	0.474158	0.470505	0.473228	0.469758	0.467361	0.472809	0.471613	0.472336	0.471366	0.469547	0.468544	0.46939	0.466424	0.464441	0.466716	0.467104	0.462511	0.462072	0.458293	0.449469	0.47282	0.47488	0.470243	0.473209
SRR5084491	Bovismorbificans	B2	0.475336	0.464229	0.458405	0.462178	0.474936	0.470578	0.46782	0.464843	0.473955	0.463203	0.469468	0.477394	0.466021	0.469482	0.461018	0.457426	0.457497	0.454864	0.471258	0.471061	0.468071	0.468737	0.464511	0.474062	0.470348	0.473264	0.469659	0.467251	0.472819	0.47146	0.47234	0.471324	0.469434	0.468467	0.469337	0.467391	0.46432	0.466713	0.476675	0.471977	0.471588	0.458257	0.449557	0.472851	0.474658	0.470273	0.473297
SRR6208541	Bovismorbificans	B2	0.475496	0.460919	0.458321	0.463866	0.475058	0.470596	0.467772	0.464808	0.473792	0.462955	0.469515	0.477404	0.465921	0.469364	0.460973	0.457455	0.457255	0.457105	0.47302	0.472816	0.4697	0.470289	0.466084	0.474149	0.470364	0.473314	0.469693	0.467313	0.472788	0.471524	0.472309	0.47132	0.469449	0.468507	0.469362	0.467905	0.465724	0.466725	0.46714	0.462554	0.462116	0.460088	0.449382	0.472865	0.474716	0.471	0.473287
SRR6336400	Bovismorbificans	B2	0.474722	0.458555	0.459573	0.461626	0.474338	0.470007	0.467215	0.464276	0.473185	0.462442	0.468905	0.476725	0.46628	0.469756	0.463672	0.460101	0.45988	0.455189	0.470631	0.470442	0.467386	0.468131	0.467174	0.473404	0.475277	0.472641	0.472396	0.469973	0.475528	0.474174	0.475046	0.474062	0.472126	0.471203	0.472055	0.468982	0.463711	0.466078	0.467576	0.462989	0.4627	0.457686	0.452715	0.472208	0.479018	0.469649	0.47272
SRR6419018	Bovismorbificans	B2	0.474791	0.458641	0.458281	0.461545	0.474407	0.470002	0.467165	0.464194	0.484409	0.473143	0.468741	0.476613	0.465875	0.469349	0.460326	0.458049	0.456622	0.454872	0.470656	0.470421	0.467352	0.468017	0.463805	0.473391	0.469794	0.472562	0.469057	0.466588	0.47208	0.470766	0.471585	0.470638	0.468738	0.467773	0.468666	0.465612	0.463838	0.466104	0.466546	0.461983	0.461691	0.457626	0.449404	0.472221	0.473991	0.469652	0.472618
SRR6904870	Bovismorbificans	B2	0.471566	0.455686	0.456308	0.458445	0.471151	0.466773	0.46394	0.460973	0.481084	0.469863	0.465438	0.473298	0.463818	0.467202	0.457299	0.45508	0.453657	0.452709	0.467445	0.467222	0.464176	0.464846	0.460719	0.470162	0.466634	0.469344	0.465925	0.463491	0.468858	0.46765	0.468379	0.467469	0.465617	0.464664	0.465526	0.462548	0.460714	0.462946	0.46349	0.458984	0.458691	0.454638	0.447541	0.469006	0.470948	0.466463	0.469382
SRR3199696	Bovismorbificans	B2	0.471146	0.45527	0.455464	0.458044	0.470747	0.466429	0.463688	0.460812	0.480717	0.469574	0.465158	0.472956	0.462333	0.465739	0.459949	0.457626	0.456201	0.451375	0.467046	0.46683	0.463836	0.464623	0.463515	0.469735	0.469155	0.468886	0.468555	0.466154	0.471669	0.470351	0.471129	0.470243	0.468247	0.467357	0.46829	0.465197	0.460264	0.462483	0.463796	0.459226	0.459009	0.454225	0.448424	0.468553	0.474277	0.466046	0.469102
SRR2102466	Hindmarsh	B2	0.471504	0.455459	0.454669	0.45851	0.471096	0.466677	0.463859	0.460935	0.469866	0.459145	0.465554	0.473378	0.462115	0.465552	0.457267	0.453799	0.453609	0.451075	0.467462	0.467292	0.464232	0.464895	0.460718	0.470248	0.466518	0.469402	0.465852	0.463503	0.468884	0.46766	0.468404	0.467458	0.465624	0.464674	0.465524	0.462556	0.460662	0.462907	0.463334	0.458821	0.458389	0.454653	0.445932	0.469071	0.470787	0.46644	0.46937
SRR5865206	Bovismorbificans	B2	0.466162	0.454917	0.449836	0.453371	0.465699	0.461342	0.458577	0.455632	0.46469	0.454008	0.4601	0.467876	0.457129	0.460461	0.452267	0.448867	0.448902	0.44635	0.462155	0.46198	0.459021	0.459653	0.455596	0.464866	0.461259	0.464066	0.460621	0.458342	0.463599	0.46239	0.463127	0.462186	0.4604	0.459469	0.460284	0.459225	0.455557	0.457743	0.462409	0.457917	0.457512	0.44969	0.441353	0.463654	0.46543	0.461179	0.464026
SRR3930271	Bovismorbificans	B2	0.460343	0.449667	0.444935	0.447832	0.459872	0.455524	0.452773	0.449884	0.458918	0.448254	0.454178	0.461916	0.451518	0.454764	0.449612	0.446323	0.446357	0.441035	0.456432	0.456287	0.453385	0.454258	0.452945	0.45912	0.45817	0.458399	0.457961	0.455719	0.460777	0.459629	0.460323	0.459434	0.457759	0.456836	0.461011	0.456513	0.45006	0.452111	0.457618	0.453207	0.452998	0.444419	0.438017	0.461262	0.463643	0.455542	0.458455
SRR5341695	Bovismorbificans	B2	0.460609	0.449683	0.444691	0.448083	0.460132	0.455852	0.453105	0.450219	0.459177	0.448532	0.454518	0.462243	0.451761	0.455008	0.447095	0.443803	0.443867	0.441298	0.456737	0.456498	0.453681	0.454423	0.450386	0.459298	0.455803	0.458615	0.4554	0.453105	0.458184	0.456979	0.457757	0.456838	0.455095	0.454221	0.458233	0.453893	0.450263	0.452405	0.456928	0.452608	0.452441	0.444522	0.436506	0.461141	0.459918	0.455845	0.458702
SRR1646527	Bovismorbificans	B2	0.448985	0.43369	0.432829	0.436448	0.448573	0.444819	0.442383	0.439784	0.447539	0.438619	0.444142	0.451143	0.440129	0.443239	0.435525	0.431951	0.4318	0.429485	0.445057	0.444925	0.442031	0.442777	0.438857	0.447799	0.444268	0.446944	0.443507	0.441393	0.446645	0.445286	0.446148	0.445276	0.443313	0.442442	0.443454	0.440409	0.438515	0.441289	0.441213	0.436897	0.436451	0.432942	0.42445	0.446569	0.448471	0.444139	0.447048
SRR5501179	Bovismorbificans	B2	0.462329	0.447027	0.446127	0.449727	0.461847	0.457509	0.454726	0.45181	0.460657	0.449996	0.45623	0.463968	0.453281	0.456533	0.448604	0.445233	0.445101	0.44261	0.458382	0.45826	0.455279	0.455908	0.451892	0.461048	0.457512	0.460235	0.456835	0.454591	0.459736	0.45858	0.459286	0.45838	0.45664	0.455683	0.456522	0.453685	0.45184	0.453891	0.45443	0.450095	0.449663	0.446078	0.437831	0.459853	0.461571	0.457417	0.460241
SRR965140	Bovismorbificans	B2	0.455095	0.439856	0.439179	0.442634	0.454639	0.450442	0.447803	0.444853	0.453103	0.442716	0.44874	0.4564	0.446055	0.449141	0.44145	0.438238	0.438061	0.43561	0.451011	0.450846	0.447944	0.448556	0.444662	0.453607	0.450109	0.452799	0.449498	0.447281	0.45231	0.451216	0.451866	0.450974	0.449299	0.448366	0.449167	0.446447	0.444663	0.446646	0.44715	0.442943	0.442511	0.439044	0.431216	0.45233	0.453871	0.450116	0.452906
SRR5000218	Bovismorbificans	B2	0.454313	0.439279	0.438599	0.441977	0.45377	0.449467	0.446764	0.443836	0.452642	0.442081	0.448127	0.455748	0.44546	0.448626	0.440921	0.43772	0.437562	0.435178	0.450434	0.450266	0.447441	0.448041	0.444146	0.453016	0.449552	0.452219	0.44893	0.446767	0.451753	0.450622	0.451305	0.450425	0.448717	0.447814	0.448642	0.445877	0.444116	0.446059	0.446612	0.442367	0.441976	0.438514	0.430652	0.451807	0.453532	0.449453	0.452174
AE006468	Typhimurium	LT2	0.564844	0.565721	0.551453	0.556549	0.564789	0.558279	0.554966	0.550685	0.563619	0.54813	0.556818	0.56665	0.562934	0.558906	0.555741	0.552763	0.552264	0.549949	0.569402	0.569255	0.564533	0.565218	0.559933	0.572778	0.568175	0.571263	0.567408	0.564477	0.570368	0.569036	0.568869	0.567479	0.567097	0.56519	0.564947	0.564626	0.560945	0.563112	0.569995	0.564133	0.56291	0.553571	0.536408	0.55961	0.556356	0.551318	0.554804
SRR5598928	Muenchen	M1	0.575926	0.557504	0.558297	0.564655	0.579668	0.5729	0.569715	0.565515	0.577378	0.561447	0.570723	0.581289	0.570608	0.573433	0.564015	0.559702	0.558849	0.555744	0.577437	0.577187	0.572985	0.573778	0.568319	0.581057	0.575995	0.579561	0.575313	0.572088	0.5792	0.57692	0.577561	0.576177	0.57503	0.57353	0.573994	0.571138	0.568445	0.569046	0.572056	0.566052	0.565391	0.560922	0.542848	0.571167	0.572704	0.567685	0.571402
SRR5598924	Muenchen	M1	0.567598	0.550195	0.550284	0.556919	0.571263	0.564649	0.561467	0.557312	0.569042	0.55343	0.562662	0.572847	0.562371	0.565126	0.555906	0.55168	0.550846	0.549412	0.569956	0.56967	0.565533	0.566494	0.561114	0.572646	0.567652	0.571195	0.567022	0.563821	0.570826	0.568583	0.56919	0.567845	0.566738	0.565247	0.565742	0.563931	0.561335	0.560994	0.563825	0.557898	0.557283	0.553872	0.535163	0.562863	0.564386	0.561753	0.563069
SRR5819759	Muenchen	M1	0.562681	0.540889	0.537864	0.544517	0.560478	0.553878	0.550927	0.546797	0.558649	0.5431	0.551946	0.562169	0.549428	0.554726	0.54364	0.539486	0.538714	0.535612	0.555727	0.55549	0.551856	0.552439	0.547421	0.55907	0.554343	0.557938	0.553789	0.550698	0.557527	0.555153	0.556073	0.554804	0.553445	0.552196	0.552651	0.549882	0.547393	0.547918	0.550776	0.545135	0.545055	0.54058	0.523382	0.557844	0.559262	0.555507	0.559065
ARYW01	Muenchen	M1	0.542616	0.523786	0.520746	0.526423	0.540555	0.534401	0.531445	0.527648	0.540778	0.526087	0.533467	0.543456	0.531295	0.533571	0.526089	0.52307	0.521843	0.518729	0.536994	0.536736	0.533235	0.534033	0.529239	0.540096	0.535656	0.539061	0.535226	0.532284	0.538702	0.536516	0.537292	0.536091	0.534984	0.533714	0.534121	0.531731	0.529291	0.531905	0.532346	0.527021	0.527276	0.523445	0.507577	0.536623	0.537384	0.535668	0.53902
SRR2015637	Muenchen	M1	0.545906	0.524687	0.522512	0.528163	0.544198	0.537932	0.534902	0.530821	0.542353	0.527234	0.535466	0.545576	0.533149	0.536536	0.527305	0.52348	0.522736	0.520149	0.539038	0.538792	0.535316	0.536071	0.531346	0.542269	0.53786	0.541035	0.537239	0.534286	0.540853	0.538917	0.539741	0.538581	0.536922	0.535779	0.536693	0.533028	0.531181	0.531238	0.534348	0.529119	0.528536	0.524465	0.509457	0.538928	0.540546	0.53953	0.542852
SRR1105695	Muenchen	M1	0.562269	0.543886	0.538003	0.54476	0.560296	0.553766	0.550817	0.5467	0.55928	0.543794	0.552652	0.562928	0.549772	0.555119	0.543444	0.539257	0.538686	0.535874	0.556036	0.555806	0.552061	0.552762	0.547721	0.559391	0.554634	0.5582	0.554039	0.550941	0.557842	0.555488	0.556363	0.555068	0.553772	0.55251	0.552936	0.551515	0.549336	0.547935	0.554893	0.549188	0.548648	0.540386	0.523437	0.558299	0.560634	0.555369	0.55887
SRR1021937	Muenchen	M1	0.557377	0.54437	0.542186	0.546782	0.556909	0.550389	0.547402	0.543355	0.55812	0.542446	0.547468	0.557719	0.552747	0.550728	0.549326	0.549083	0.54475	0.539377	0.55898	0.558856	0.554696	0.555596	0.553134	0.562355	0.560223	0.561143	0.560122	0.557081	0.563356	0.561277	0.561812	0.560396	0.559926	0.558208	0.562212	0.558085	0.551033	0.551236	0.559094	0.553366	0.553081	0.544178	0.529178	0.556472	0.553706	0.54537	0.548953
SRR5487931	Muenchen	M1	0.538514	0.519869	0.517326	0.522065	0.534595	0.528234	0.525474	0.521396	0.537043	0.521956	0.527858	0.537698	0.526959	0.528579	0.524655	0.523093	0.520159	0.515813	0.532698	0.532542	0.528995	0.529858	0.528144	0.535855	0.53436	0.534854	0.534316	0.531509	0.537546	0.535545	0.536168	0.534938	0.534096	0.532781	0.536681	0.5306	0.525199	0.525484	0.529214	0.524013	0.523898	0.519065	0.505244	0.536446	0.536377	0.528472	0.531756
SRR6807857	Muenchen	M1	0.54561	0.526637	0.523123	0.528765	0.545601	0.539074	0.53617	0.532129	0.543605	0.528302	0.535823	0.545868	0.533624	0.536083	0.528112	0.524988	0.523649	0.520637	0.539576	0.539369	0.535775	0.536417	0.531622	0.542698	0.538248	0.541556	0.537768	0.534891	0.541196	0.539071	0.539752	0.538574	0.5375	0.536222	0.536595	0.534263	0.533404	0.534273	0.534869	0.529548	0.529325	0.525528	0.50974	0.539154	0.540231	0.536658	0.539875
SRR6807956	Muenchen	M1	0.566612	0.544579	0.54126	0.548074	0.56366	0.557021	0.554052	0.54989	0.563888	0.54827	0.556409	0.566587	0.553113	0.558662	0.547014	0.543688	0.542066	0.539225	0.55953	0.559296	0.555515	0.556348	0.55111	0.56296	0.558212	0.561851	0.557722	0.554596	0.561414	0.559034	0.559894	0.558626	0.557432	0.556122	0.56043	0.553676	0.551303	0.551571	0.554433	0.548711	0.548488	0.544082	0.526448	0.566944	0.564201	0.5591	0.562715
AOXN01	Muenchen	M1	0.58673	0.567706	0.568358	0.575137	0.590628	0.583845	0.580726	0.576479	0.588304	0.572321	0.581983	0.592579	0.581092	0.584001	0.574295	0.569837	0.568927	0.56582	0.588144	0.58789	0.583644	0.584427	0.57886	0.591882	0.586636	0.590461	0.585967	0.582563	0.59004	0.587535	0.58839	0.586918	0.585632	0.58413	0.584677	0.581666	0.578858	0.579555	0.582565	0.576296	0.575698	0.571032	0.552374	0.581927	0.583471	0.57826	0.582235
AUQE01	Muenchen	M1	0.564475	0.546517	0.547308	0.553783	0.568211	0.562474	0.559324	0.555498	0.566001	0.551406	0.560271	0.570491	0.559728	0.561904	0.552979	0.548663	0.547795	0.545014	0.56588	0.565565	0.561726	0.56247	0.557299	0.569369	0.564498	0.568205	0.563847	0.560681	0.567877	0.565276	0.566229	0.564942	0.5635	0.562167	0.562666	0.559776	0.557078	0.557717	0.560635	0.554772	0.554256	0.549722	0.532254	0.559945	0.561481	0.556579	0.560417
QDOQ01	Muenchen	M1	0.569616	0.547926	0.544056	0.552466	0.56761	0.561027	0.557958	0.553811	0.567024	0.551551	0.560496	0.570928	0.555684	0.561212	0.549359	0.545037	0.544256	0.543876	0.563972	0.563908	0.560165	0.560778	0.55569	0.565678	0.560857	0.564395	0.560122	0.556988	0.56406	0.561886	0.562885	0.561619	0.559758	0.558562	0.559565	0.557471	0.555272	0.554046	0.55701	0.551228	0.550729	0.548306	0.529461	0.564515	0.567386	0.56178	0.564673
SRR5573059	Muenchen	M1	0.572709	0.549572	0.547532	0.553904	0.570715	0.564201	0.560932	0.556791	0.568669	0.553151	0.562148	0.572494	0.559108	0.562916	0.555302	0.551088	0.55026	0.544846	0.565532	0.565294	0.561356	0.562207	0.559616	0.569045	0.566793	0.567736	0.566324	0.563203	0.570215	0.567933	0.568657	0.567411	0.566034	0.564633	0.565255	0.561752	0.556925	0.557513	0.562877	0.557073	0.556442	0.549586	0.534262	0.565547	0.570991	0.566159	0.56989
SRR1060658	Muenchen	M1	0.55725	0.538907	0.540004	0.545903	0.560871	0.554252	0.551187	0.546881	0.55891	0.543184	0.551881	0.562158	0.55115	0.553603	0.545183	0.541042	0.540235	0.539017	0.558299	0.557919	0.554314	0.555277	0.550161	0.560873	0.556147	0.559506	0.555554	0.552418	0.559387	0.557097	0.558052	0.556728	0.555127	0.554048	0.554846	0.552042	0.5501	0.549382	0.552428	0.54681	0.546437	0.543013	0.526179	0.551667	0.553184	0.550295	0.551415
SRR6129256	Muenchen	M1	0.582572	0.560224	0.557427	0.564603	0.577115	0.570522	0.567315	0.563149	0.574747	0.559105	0.568219	0.578594	0.569969	0.569728	0.563246	0.559022	0.558089	0.55509	0.576644	0.576398	0.57232	0.572896	0.567535	0.580317	0.57528	0.578925	0.574574	0.571507	0.578506	0.576027	0.576949	0.575486	0.574243	0.572687	0.573358	0.569922	0.567818	0.56857	0.571343	0.565331	0.564595	0.560202	0.541641	0.576221	0.572726	0.572413	0.576138
SRR1157604	Muenchen	M1	0.581496	0.558939	0.556163	0.563529	0.575914	0.569598	0.566418	0.562329	0.57352	0.558066	0.567287	0.57774	0.56882	0.56857	0.562077	0.55772	0.556874	0.553792	0.575373	0.575199	0.571156	0.571715	0.566487	0.579183	0.574165	0.577699	0.573332	0.570129	0.577355	0.574891	0.575806	0.574384	0.573025	0.571438	0.572131	0.568705	0.566515	0.567063	0.570157	0.564313	0.563426	0.55904	0.540353	0.575025	0.571592	0.571198	0.574981
SRR2910997	Muenchen	M1	0.583836	0.559446	0.557105	0.56445	0.582135	0.575416	0.572296	0.567943	0.581479	0.565694	0.575088	0.585641	0.569665	0.57555	0.562997	0.558408	0.557615	0.554891	0.576359	0.576185	0.572225	0.572918	0.567508	0.580302	0.575259	0.57878	0.574281	0.571055	0.578415	0.576705	0.577654	0.576288	0.574045	0.572644	0.574127	0.569494	0.567392	0.568013	0.571138	0.565057	0.564454	0.559707	0.541628	0.578937	0.582446	0.575146	0.578975
SRR7183160	Muenchen	M1	0.58008	0.55667	0.553406	0.56003	0.577687	0.571067	0.567808	0.563773	0.576556	0.561215	0.569751	0.579786	0.565914	0.570195	0.558843	0.554466	0.553646	0.551494	0.57192	0.571631	0.567678	0.568392	0.563047	0.575496	0.570732	0.574146	0.569901	0.566806	0.573771	0.571382	0.572236	0.57093	0.56949	0.56815	0.568839	0.565154	0.563124	0.564497	0.566769	0.560755	0.560404	0.555581	0.537742	0.57222	0.574229	0.572861	0.576618
MATF01	Muenchen	M1	0.592022	0.567729	0.564534	0.572321	0.590024	0.583424	0.580039	0.575828	0.588303	0.572403	0.582104	0.592722	0.577568	0.582149	0.571061	0.566382	0.565549	0.562415	0.584413	0.584192	0.580168	0.580875	0.575341	0.588223	0.583048	0.586882	0.582284	0.578927	0.586543	0.583947	0.585008	0.583604	0.581982	0.580621	0.581347	0.577455	0.575182	0.57594	0.578981	0.57275	0.572543	0.56769	0.548301	0.585206	0.58739	0.585787	0.58977
PJAL01	Muenchen	M1	0.581525	0.563115	0.555374	0.562161	0.578326	0.571652	0.568621	0.564373	0.578042	0.562191	0.571336	0.581833	0.567748	0.57312	0.561471	0.556913	0.556333	0.553071	0.573905	0.573685	0.569876	0.570506	0.565225	0.577472	0.572466	0.576364	0.571882	0.568609	0.576042	0.573331	0.574717	0.573131	0.571527	0.570277	0.570777	0.569219	0.56498	0.566272	0.574139	0.568039	0.568302	0.558079	0.539963	0.576246	0.578594	0.573031	0.576894
MXIO01	Muenchen	M1	0.5787	0.559717	0.558592	0.564842	0.575263	0.569061	0.565943	0.561652	0.575275	0.559625	0.568016	0.578339	0.569924	0.568391	0.563596	0.560007	0.558264	0.556383	0.576637	0.576423	0.572418	0.573269	0.567883	0.580239	0.575188	0.579107	0.574733	0.571434	0.578895	0.576047	0.577169	0.57583	0.574406	0.573014	0.573528	0.570555	0.567789	0.568643	0.571441	0.56535	0.564902	0.560341	0.542941	0.576612	0.57181	0.568684	0.572611
SRR1177322	Muenchen	M1	0.579593	0.56059	0.55931	0.565569	0.57597	0.569435	0.566238	0.5624	0.575857	0.560389	0.568534	0.578926	0.570828	0.56926	0.564251	0.560794	0.559025	0.55709	0.577462	0.577299	0.573123	0.573894	0.56852	0.58114	0.57614	0.579925	0.575596	0.572442	0.579407	0.576925	0.577818	0.576486	0.575318	0.573701	0.57413	0.571428	0.568677	0.569971	0.572284	0.566245	0.565703	0.561244	0.543529	0.577337	0.572684	0.569368	0.57317
MEKG01	Muenchen	M1	0.570634	0.553096	0.545841	0.55281	0.568467	0.561783	0.558755	0.554588	0.567837	0.552051	0.561187	0.571547	0.557888	0.563469	0.551425	0.547141	0.546772	0.543661	0.564417	0.564161	0.560286	0.561017	0.555782	0.56787	0.563001	0.566655	0.562387	0.559199	0.566254	0.563832	0.564721	0.563454	0.562054	0.5608	0.56123	0.559867	0.555775	0.556204	0.563259	0.557391	0.556789	0.548246	0.530819	0.5668	0.569132	0.563752	0.567419
SRR7234614	Muenchen	M1	0.570433	0.548092	0.544386	0.551302	0.56656	0.559993	0.556851	0.552824	0.565962	0.550369	0.559351	0.569658	0.556387	0.560497	0.550148	0.545919	0.545187	0.542224	0.562787	0.56257	0.558723	0.559476	0.55431	0.56626	0.561422	0.565027	0.56088	0.557801	0.564725	0.562314	0.563174	0.561893	0.560589	0.559278	0.559691	0.556888	0.554263	0.554778	0.557701	0.551918	0.551441	0.547042	0.529463	0.563072	0.565394	0.564504	0.568074
SRR6833425	Muenchen	M1	0.569484	0.548878	0.545091	0.551969	0.567916	0.56118	0.558208	0.554004	0.567285	0.551399	0.560606	0.571022	0.557026	0.562545	0.550658	0.546399	0.545581	0.542794	0.563607	0.563401	0.559482	0.560161	0.554904	0.567095	0.562228	0.565769	0.561605	0.55845	0.565392	0.563067	0.563874	0.562523	0.561301	0.559905	0.560375	0.55763	0.555023	0.555469	0.558466	0.552658	0.552018	0.548078	0.530128	0.565713	0.567604	0.562244	0.565865
ARYX01	Muenchen	M1	0.55186	0.532828	0.529149	0.535225	0.550195	0.544136	0.541136	0.537281	0.549818	0.535082	0.542936	0.552944	0.540232	0.54236	0.53501	0.531667	0.53048	0.526822	0.546099	0.545802	0.542189	0.543055	0.538122	0.549268	0.54468	0.548236	0.544303	0.541273	0.547941	0.545537	0.546401	0.545219	0.543986	0.542798	0.543233	0.540778	0.538119	0.540219	0.541287	0.535794	0.536176	0.532245	0.515345	0.545688	0.546143	0.545998	0.549494
SRR6807507	Muenchen	M1	0.544777	0.525502	0.523221	0.529066	0.542819	0.536274	0.533325	0.529329	0.54238	0.527142	0.534878	0.544899	0.533964	0.536203	0.529312	0.526178	0.524999	0.520805	0.539888	0.539618	0.535878	0.536668	0.531793	0.543099	0.538643	0.541815	0.538171	0.535226	0.541372	0.539534	0.539966	0.538802	0.537885	0.536466	0.536879	0.533144	0.532253	0.533989	0.535185	0.529898	0.530484	0.526784	0.509812	0.538119	0.538916	0.538373	0.541634
MLSV01	Muenchen	M1	0.550639	0.530942	0.529295	0.534738	0.54859	0.542056	0.539075	0.535043	0.548224	0.532846	0.540795	0.550946	0.539583	0.541947	0.537513	0.534247	0.533002	0.52631	0.54565	0.545421	0.541624	0.542551	0.540136	0.548893	0.546748	0.547709	0.546572	0.543505	0.549953	0.547879	0.548495	0.547297	0.546289	0.544908	0.545281	0.541341	0.537831	0.539672	0.541756	0.536311	0.537029	0.532233	0.516768	0.543923	0.547938	0.544116	0.547598
NLCG02	Muenchen	M1	0.53919	0.521367	0.518271	0.52493	0.537216	0.530678	0.527742	0.523748	0.536599	0.521381	0.529097	0.539041	0.528602	0.530946	0.524191	0.521101	0.519937	0.516955	0.535479	0.53538	0.531751	0.532412	0.527698	0.537563	0.533198	0.536338	0.53271	0.529831	0.535891	0.534025	0.534506	0.53335	0.532449	0.531044	0.53141	0.528852	0.530137	0.528536	0.529855	0.524623	0.525345	0.522793	0.505163	0.532164	0.532898	0.535188	0.536176
SRR6807554	Muenchen	M1	0.54152	0.527478	0.520419	0.525039	0.539594	0.533031	0.530076	0.526104	0.539481	0.524135	0.53168	0.541695	0.530171	0.532229	0.528427	0.52527	0.524358	0.520891	0.535707	0.535527	0.5319	0.532767	0.53144	0.538872	0.538283	0.537701	0.537638	0.534739	0.540973	0.538925	0.539529	0.53833	0.537416	0.53607	0.536404	0.535959	0.528177	0.530728	0.538198	0.532877	0.533244	0.522377	0.509141	0.535088	0.540785	0.532046	0.535377
SRR6833746	Muenchen	M1	0.538979	0.521868	0.51722	0.523555	0.537117	0.530598	0.527646	0.52381	0.537281	0.522199	0.529856	0.539691	0.527606	0.529832	0.522695	0.519583	0.518415	0.519402	0.534043	0.533539	0.529899	0.530846	0.52635	0.536467	0.532105	0.535242	0.531666	0.528982	0.534868	0.53293	0.533459	0.53228	0.531411	0.530104	0.530407	0.528826	0.52632	0.527988	0.528787	0.523569	0.523846	0.520573	0.504228	0.532679	0.533736	0.530307	0.53301
SRR2966846	Muenchen	M1	0.546863	0.526731	0.523946	0.529205	0.543599	0.537091	0.534179	0.53015	0.543845	0.528607	0.536409	0.546395	0.534116	0.536126	0.531845	0.528676	0.52742	0.524699	0.539999	0.539823	0.536169	0.53691	0.53485	0.543262	0.54139	0.542031	0.541085	0.53824	0.544538	0.542511	0.54318	0.542006	0.54093	0.539495	0.539997	0.537298	0.532315	0.53428	0.53795	0.532559	0.533018	0.526631	0.512004	0.539385	0.543685	0.535622	0.538942
SRR5896169	Muenchen	M1	0.540974	0.524889	0.518795	0.523792	0.537443	0.530866	0.527991	0.523951	0.537583	0.522383	0.529844	0.539811	0.52877	0.531029	0.528318	0.525197	0.524196	0.515973	0.534396	0.534217	0.530583	0.531432	0.528965	0.537554	0.534916	0.536351	0.53516	0.532268	0.538417	0.536503	0.537002	0.535864	0.534969	0.533601	0.533873	0.531652	0.526936	0.528578	0.535082	0.52979	0.532283	0.523465	0.506856	0.532411	0.536299	0.529265	0.532488
NLCA02	Muenchen	M1	0.554145	0.536045	0.532333	0.538499	0.555635	0.548945	0.545997	0.541957	0.553574	0.538052	0.54618	0.556329	0.543358	0.546061	0.537549	0.534142	0.532815	0.529871	0.549581	0.549362	0.545634	0.546323	0.541396	0.552837	0.548252	0.551707	0.547758	0.544713	0.551356	0.549139	0.54987	0.548634	0.547513	0.54618	0.546601	0.543991	0.541478	0.541761	0.544731	0.539213	0.538845	0.534714	0.51816	0.549304	0.550544	0.547358	0.550833
SRR6833739	Muenchen	M1	0.530531	0.518774	0.509759	0.514148	0.528494	0.522061	0.519186	0.515238	0.528465	0.51338	0.5208	0.530612	0.518851	0.52106	0.517579	0.514548	0.513422	0.510298	0.524392	0.524199	0.520796	0.52802	0.52038	0.527376	0.526189	0.52775	0.527741	0.524952	0.529525	0.527563	0.528169	0.527023	0.52734	0.526147	0.525353	0.523019	0.521905	0.520829	0.52086	0.515852	0.51786	0.512986	0.499515	0.529546	0.529185	0.530312	0.534457
QDPQ01	Muenchen	M2	0.590741	0.567237	0.564	0.571978	0.588238	0.581299	0.578308	0.573365	0.587357	0.570732	0.580487	0.591294	0.576965	0.582999	0.570565	0.565879	0.565012	0.562058	0.584154	0.583886	0.57996	0.580648	0.57521	0.587837	0.582813	0.586622	0.582065	0.57875	0.586325	0.583628	0.58473	0.58339	0.581739	0.580491	0.580896	0.577591	0.575034	0.575427	0.578704	0.572577	0.572003	0.566993	0.54696	0.586302	0.58888	0.583576	0.587514
SRR6895845	Muenchen	M2	0.589803	0.568794	0.563122	0.571065	0.587231	0.580289	0.577321	0.572366	0.586393	0.569724	0.579464	0.59072	0.576119	0.582116	0.569656	0.564966	0.564397	0.561434	0.583259	0.583031	0.579053	0.579741	0.574264	0.586967	0.581939	0.585644	0.581114	0.577847	0.585369	0.582759	0.583782	0.582427	0.580818	0.579549	0.5799	0.577135	0.574207	0.57446	0.580095	0.574002	0.573346	0.56614	0.546169	0.58541	0.587934	0.582061	0.585939
SRR5740043	Muenchen	M2	0.586624	0.572148	0.560453	0.57169	0.584146	0.577216	0.574269	0.569325	0.583568	0.566952	0.576287	0.587101	0.573325	0.579246	0.566752	0.562172	0.561455	0.561031	0.583678	0.58276	0.57881	0.579376	0.574398	0.583837	0.578893	0.582587	0.578095	0.574831	0.582288	0.579636	0.580699	0.579374	0.5778	0.576541	0.576889	0.577542	0.573987	0.571535	0.579662	0.573554	0.572934	0.565835	0.543656	0.582316	0.58477	0.580056	0.582826
SRR1631190	Muenchen	M2	0.586108	0.576959	0.56768	0.575434	0.582817	0.575973	0.572979	0.568126	0.583611	0.566902	0.576302	0.587094	0.580841	0.5751	0.574062	0.56976	0.569003	0.565402	0.587828	0.587614	0.583272	0.584049	0.578693	0.591517	0.586477	0.590152	0.585721	0.582429	0.589699	0.587176	0.588145	0.586877	0.585427	0.583926	0.587839	0.582576	0.578806	0.578357	0.588701	0.582476	0.581782	0.570891	0.550304	0.58621	0.579636	0.57407	0.577825
LHIJ01	Muenchen	M2	0.590652	0.582883	0.571801	0.579924	0.587429	0.580509	0.577541	0.572587	0.587932	0.571246	0.581009	0.591882	0.58506	0.579251	0.578564	0.57414	0.573135	0.569586	0.592346	0.592109	0.587768	0.599385	0.583297	0.596075	0.591362	0.596245	0.591849	0.588434	0.59444	0.591835	0.592827	0.591594	0.591413	0.58985	0.589111	0.585842	0.588036	0.584268	0.586829	0.580575	0.581767	0.576577	0.55448	0.592132	0.584273	0.583586	0.588132
SRR5805042	Muenchen	M2	0.587865	0.573183	0.569179	0.580859	0.584584	0.577687	0.574692	0.569794	0.58516	0.568453	0.578093	0.588943	0.582483	0.576696	0.575828	0.571471	0.570436	0.569452	0.593243	0.592341	0.587956	0.5886	0.583616	0.593456	0.588358	0.592003	0.587534	0.584222	0.591555	0.589047	0.589975	0.588739	0.587272	0.585712	0.586084	0.585704	0.583399	0.58011	0.584228	0.578054	0.577432	0.575267	0.551719	0.584137	0.581503	0.577004	0.579625
SRR2102469	Muenchen	M2	0.57913	0.560458	0.553281	0.564432	0.576674	0.57005	0.567086	0.562522	0.5759	0.56077	0.569889	0.57967	0.565812	0.571708	0.559595	0.555043	0.554179	0.557696	0.576198	0.575965	0.572083	0.572847	0.567444	0.576342	0.571475	0.575079	0.57068	0.56792	0.574802	0.572212	0.573262	0.57196	0.570384	0.569139	0.56954	0.569744	0.567505	0.567318	0.567496	0.561538	0.560947	0.55922	0.536769	0.574903	0.577291	0.573245	0.575406
SRR1363311	Muenchen	M2	0.576966	0.560811	0.551952	0.559977	0.574481	0.56802	0.56525	0.56052	0.576486	0.561079	0.56744	0.577584	0.564514	0.570291	0.558191	0.556044	0.553096	0.551391	0.571883	0.571681	0.567865	0.568728	0.563321	0.574813	0.569964	0.573549	0.569205	0.566378	0.573311	0.57071	0.571779	0.570509	0.568855	0.567663	0.568077	0.566964	0.563367	0.564094	0.576734	0.570742	0.570078	0.555323	0.535575	0.572743	0.575125	0.571331	0.573305
MXGC01	Muenchen	M2	0.580967	0.55951	0.555669	0.564061	0.578523	0.571746	0.568791	0.563895	0.58529	0.568579	0.570524	0.581203	0.568212	0.574035	0.561318	0.556989	0.555925	0.556912	0.576298	0.575989	0.572195	0.5731	0.567568	0.577945	0.573277	0.576777	0.572356	0.569096	0.576531	0.573812	0.574966	0.573695	0.572011	0.570884	0.571235	0.569987	0.567682	0.565759	0.569253	0.563297	0.562895	0.559431	0.539243	0.576555	0.578874	0.576374	0.577176
MXRH01	Muenchen	M2	0.572068	0.556976	0.547487	0.554951	0.569507	0.562963	0.56003	0.555193	0.576237	0.559774	0.561509	0.572151	0.559564	0.565171	0.553193	0.548981	0.547923	0.547936	0.566668	0.566481	0.56288	0.569682	0.55859	0.56894	0.564442	0.569391	0.565344	0.562134	0.567966	0.565239	0.566388	0.565121	0.564785	0.56372	0.566379	0.560865	0.563483	0.558599	0.560562	0.554779	0.556505	0.551925	0.531985	0.57705	0.570135	0.572441	0.575228
LHMH01	Muenchen	M2	0.578523	0.556869	0.553389	0.560683	0.576017	0.569216	0.566279	0.561396	0.582749	0.566013	0.567953	0.578638	0.565786	0.571563	0.559044	0.554771	0.553703	0.552701	0.572753	0.572482	0.568754	0.569576	0.564137	0.575435	0.570827	0.574329	0.569997	0.566762	0.57407	0.571434	0.572507	0.571243	0.569651	0.568431	0.572298	0.566554	0.564001	0.563414	0.566872	0.560949	0.560549	0.556069	0.537033	0.577875	0.576427	0.571699	0.574823
SRR1588674	Muenchen	M2	0.583072	0.56569	0.557647	0.564505	0.580562	0.573796	0.5709	0.566054	0.587457	0.570842	0.572815	0.583409	0.57028	0.576126	0.563507	0.559115	0.558031	0.555789	0.576455	0.576227	0.572347	0.578585	0.567951	0.58006	0.575349	0.580556	0.57638	0.5732	0.57881	0.576177	0.577246	0.575926	0.575985	0.574742	0.577128	0.57032	0.57312	0.570223	0.571341	0.565343	0.566731	0.561388	0.541335	0.588226	0.581269	0.580899	0.585168
SRR1952686	Muenchen	M2	0.570859	0.551516	0.552697	0.553243	0.56727	0.56057	0.557756	0.552901	0.566608	0.550438	0.559411	0.570044	0.557702	0.562942	0.551739	0.547402	0.546935	0.544117	0.564806	0.564723	0.560942	0.562099	0.556431	0.567889	0.563743	0.568878	0.564748	0.561719	0.566459	0.564464	0.565446	0.564153	0.563803	0.562563	0.561897	0.559763	0.556891	0.558821	0.562548	0.55678	0.558105	0.551336	0.553987	0.566653	0.569306	0.563803	0.567048
SRR1958087	Muenchen	M2	0.571122	0.562267	0.545902	0.557005	0.568438	0.561816	0.558941	0.554093	0.567758	0.551557	0.560677	0.571288	0.558048	0.563632	0.552076	0.547579	0.548889	0.54534	0.569275	0.569824	0.566234	0.566716	0.56167	0.56812	0.563439	0.566988	0.562762	0.559625	0.566859	0.564137	0.565265	0.564021	0.562361	0.561282	0.561689	0.563679	0.561175	0.556271	0.559624	0.553822	0.553462	0.551167	0.530138	0.566924	0.569023	0.569679	0.568634
SRR1970331	Muenchen	M2	0.576791	0.568803	0.551879	0.563017	0.57399	0.567344	0.564467	0.559639	0.573627	0.557349	0.566048	0.576766	0.56425	0.568915	0.558387	0.55409	0.555027	0.55135	0.575631	0.576177	0.572537	0.573122	0.567874	0.574486	0.569693	0.573263	0.569085	0.565902	0.573164	0.570448	0.571625	0.570342	0.56859	0.567586	0.56799	0.570036	0.567385	0.562627	0.566311	0.560414	0.560234	0.557268	0.536553	0.572535	0.573891	0.573759	0.5726
[truncated: 283 more columns]
