# Supplementary material for: Phylogenomic Analysis of Salmonella enterica subsp. enterica Serovar Bovismorbificans from Clinical and Food Samples Using Whole Genome Wide Core Genes and kmer Binning Methods to Identify Two Distinct Polyphyletic Genome Pathotypes
Source: Microorganisms. 2022 Jun 11;10(6):1199. doi: 10.3390/microorganisms10061199 (PMC9228720; doi:10.3390/microorganisms10061199)
Supplement: Supplementary file 1 [file microorganisms-10-01199-s001.zip › Supplemental_File_S5.xlsx]

## Sheet: Title Page
Supplemental_File_S5
Mobilome data. SPIFinder and PlasmidFinder results are in the worksheet 1 ['SPI + Plasmid Table']. Presence of pSal610 in the isolates are
also listed. Worksheet 2 has data from PHASTER ['Phage Table'].
Additional details of the predictive anlaysis of the mobilome sequences in S. Bovismorbificans: We carried out extensive screening of genomic datasets from the 95 strains reported in this study initially by using pVirBov for comparison. pVirBov-like IncFIB(S), and IncFII(S) plasmids were predicted in 60 Cluster 1 strains in our study (Supplemental_File_S3 worksheet entitled ‘SPI+Plasmid Table). T…
There were other interesting trends observed among the strains of five different sequence types which include the observations: a) all four ST possessed the Gifsy1 (NC_010392) and the Salmon_118970_sal3 (NC_031940) prophages; b) while the Gifsy 2 prophage (NC_010393) were only identified in ST1499 strains; c) prophage Salmon_RE_2010 (NC_019488) was only seen in ST377 strains; and d) prophage Vibr…
SPIfinder analysis showed that a subset of strains possessed Salmonella pathogenicity islands SPI5, C63PI, SPI-13, and SPI-14, but SPI-1- SPI-4 were variably present (Supplemental_File_S3). SPI-12 (function category 8) was absent in all strains besides bovis3114ch. All strains contained SPI13 with functions 9, 10 and 11. SPI-2 was absent in all the ST142s, ST377s, ST1499s and ST2640s. All the ST1…

## Sheet: SPI + Plasmid Table
	Source	SPI-1	SPI-2	SPI-3	SPI-4	SPI-5	SPI-12	SPI-13	SPI-13	SPI-13	SPI-14	SPI-14	C63PI	ST	Plasmids Present, Plasmid Finder	PlasmidSal610
N17 0002	Clinical	⁺	₋	⁺	⁺	⁺	₋	⁺	⁺	⁺	⁺	⁺	⁺	142	Col156	-
N16 2802	Clinical	₋	₋	⁺	⁺	⁺	₋	⁺	⁺	⁺	⁺	⁺	⁺	142	Col156	-
N16 2712	Clinical	⁺	₋	⁺	₋	⁺	₋	⁺	⁺	⁺	⁺	⁺	⁺	142	Col156	-
N16 2598	Clinical	₋	₋	⁺	⁺	⁺	₋	⁺	⁺	⁺	⁺	⁺	⁺	142	Col156	-
N15 1496	Clinical	₋	₋	⁺	⁺	⁺	₋	⁺	⁺	⁺	⁺	⁺	⁺	142	Col156	-
N15 0584	Clinical	₋	₋	⁺	⁺	⁺	₋	⁺	⁺	⁺	⁺	⁺	⁺	142	Col156	-
N18 0002	Clinical	⁺	₋	⁺	⁺	⁺	₋	⁺	⁺	⁺	⁺	⁺	⁺	142	Col156, IncI1	-
N14 0646	Clinical	₋	₋	⁺	⁺	⁺	₋	⁺	⁺	⁺	⁺	⁺	⁺	1499	Col440I	-
N16 2955	Clinical	⁺	₋	⁺	⁺	⁺	₋	⁺	⁺	⁺	⁺	⁺	⁺	1499	ColpVC, IncQ1	-
N14 1527	Clinical	⁺	₋	⁺	⁺	⁺	₋	⁺	⁺	⁺	⁺	⁺	⁺	1499	IncFII(S)	-
N15 0111	Clinical	⁺	₋	₋	₋	⁺	₋	⁺	⁺	⁺	⁺	⁺	⁺	1499	IncHI2	-
M18 12182	Environment	₋	⁺	⁺	⁺	⁺	₋	⁺	⁺	⁺	₋	₋	⁺	150	IncI1	-
Bovis 278	Clinical	₋	₋	⁺	⁺	⁺	₋	⁺	⁺	⁺	⁺	⁺	⁺	142	IncI1	-
N17 0502	Clinical	⁺	₋	⁺	⁺	⁺	₋	⁺	⁺	⁺	⁺	⁺	⁺	1499	IncQ1	-
N16 0208	Clinical	₋	₋	⁺	⁺	⁺	₋	⁺	⁺	⁺	⁺	⁺	⁺	1499	IncQ1	-
sal683	Clinical	₋	₋	⁺	⁺	⁺	₋	⁺	⁺	⁺	₋	₋	⁺	150	None	-
sal681	Clinical	₋	₋	₋	⁺	⁺	₋	⁺	⁺	⁺	₋	₋	⁺	150	None	-
sal680	Clinical	₋	⁺	₋	⁺	⁺	₋	⁺	⁺	⁺	₋	₋	⁺	150	None	-
sal679	Clinical	₋	₋	₋	⁺	⁺	₋	⁺	⁺	⁺	₋	₋	⁺	150	None	-
sal678	Clinical	₋	⁺	⁺	⁺	⁺	₋	⁺	⁺	⁺	⁺	⁺	⁺	150	None	-
sal677	Clinical	₋	⁺	⁺	₋	⁺	₋	⁺	⁺	⁺	⁺	⁺	⁺	150	None	-
sal676	Clinical	₋	⁺	₋	⁺	⁺	₋	⁺	⁺	⁺	⁺	⁺	⁺	150	None	-
sal644	Clinical	⁺	₋	⁺	₋	⁺	₋	⁺	⁺	⁺	⁺	⁺	⁺	1499	None	-
N18 0969	Clinical	⁺	₋	⁺	₋	⁺	₋	⁺	⁺	⁺	⁺	⁺	⁺	142	None	-
N17 0607	Clinical	₋	₋	⁺	⁺	⁺	₋	⁺	⁺	⁺	⁺	₋	⁺	142	None	-
N16 0447	Clinical, Urine	⁺	₋	⁺	⁺	⁺	₋	⁺	⁺	⁺	⁺	⁺	⁺	142	None	-
N15 2048	Clinical	₋	₋	⁺	⁺	⁺	₋	⁺	⁺	⁺	⁺	⁺	⁺	1499	None	-
N14 1962	Clinical	⁺	₋	⁺	⁺	⁺	₋	⁺	⁺	⁺	⁺	⁺	⁺	1499	None	-
N14 0147	Clinical	₋	₋	⁺	⁺	⁺	₋	⁺	⁺	⁺	⁺	⁺	⁺	142	None	-
bovispt13	Missing	₋	₋	₋	₋	⁺	₋	⁺	⁺	⁺	⁺	⁺	₋	142	None	-
boviscies13	Water	₋	₋	₋	₋	₋	₋	⁺	⁺	⁺	₋	₋	₋	150	None	-
Bovis 38	Beef	⁺	₋	⁺	⁺	⁺	₋	⁺	⁺	⁺	⁺	⁺	⁺	142	None	-
N15 0387	Clinical	₋	₋	⁺	⁺	⁺	₋	⁺	⁺	⁺	⁺	⁺	⁺	142	None	-
Bovis 187	Seafood, shrimp	₋	₋	⁺	⁺	⁺	₋	⁺	⁺	⁺	⁺	⁺	⁺	1499	None	-
Bovis 120	Seafood, squid	₋	₋	⁺	⁺	⁺	₋	⁺	⁺	⁺	⁺	⁺	⁺	1499	None	-
N16 1558	Clinical	₋	⁺	⁺	⁺	⁺	₋	⁺	⁺	⁺	⁺	⁺	⁺	150	None	-
N16 2132	Clinical	₋	₋	⁺	⁺	⁺	₋	⁺	⁺	⁺	⁺	⁺	⁺	142	Col156, IncFIB(S), IncFII(S)	+
sal682	Clinical	⁺	₋	⁺	⁺	⁺	₋	⁺	⁺	⁺	⁺	⁺	⁺	377	IncFIB(S), IncFII(S)	+
sal617	Food	₋	₋	⁺	₋	⁺	₋	⁺	⁺	⁺	⁺	⁺	⁺	377	IncFIB(S), IncFII(S)	+
sal616	Food	₋	₋	⁺	₋	⁺	₋	⁺	⁺	⁺	⁺	⁺	⁺	377	IncFIB(S), IncFII(S)	+
sal615	Clinical	⁺	₋	⁺	⁺	⁺	₋	⁺	⁺	⁺	⁺	⁺	⁺	377	IncFIB(S), IncFII(S)	+
sal609	Clinical	⁺	₋	⁺	₋	⁺	₋	⁺	⁺	⁺	⁺	⁺	⁺	377	IncFIB(S), IncFII(S)	+
N18 1144	Clinical	⁺	₋	⁺	⁺	⁺	₋	⁺	⁺	⁺	⁺	⁺	⁺	377	IncFIB(S), IncFII(S)	+
N18 1092	Clinical	⁺	₋	⁺	₋	⁺	₋	⁺	⁺	⁺	⁺	⁺	⁺	377	IncFIB(S), IncFII(S)	+
N17 2111	Clinical	₋	₋	⁺	⁺	⁺	₋	⁺	⁺	⁺	⁺	⁺	⁺	2640	IncFIB(S), IncFII(S)	+
N17 1393	Clinical	₋	₋	⁺	⁺	⁺	₋	⁺	⁺	⁺	⁺	⁺	⁺	2640	IncFIB(S), IncFII(S)	+
N17 0857	Feed	⁺	₋	⁺	⁺	⁺	₋	⁺	⁺	⁺	⁺	⁺	⁺	377	IncFIB(S), IncFII(S)	+
N17 0620	Food	⁺	₋	⁺	⁺	⁺	₋	⁺	⁺	⁺	⁺	⁺	⁺	377	IncFIB(S), IncFII(S)	+
N16 2849	Clinical	⁺	₋	⁺	⁺	⁺	₋	⁺	⁺	⁺	⁺	⁺	⁺	377	IncFIB(S), IncFII(S)	+
N16 2718	Clinical	⁺	₋	⁺	⁺	⁺	₋	⁺	⁺	⁺	⁺	⁺	⁺	377	IncFIB(S), IncFII(S)	+
N16 2682	Clinical	⁺	₋	⁺	₋	⁺	₋	⁺	⁺	⁺	⁺	⁺	⁺	142	IncFIB(S), IncFII(S)	+
N16 2424	Clinical	⁺	₋	⁺	⁺	⁺	₋	⁺	⁺	⁺	⁺	⁺	⁺	142	IncFIB(S), IncFII(S)	+
N16 2207	Animal, cat	₋	₋	⁺	⁺	⁺	₋	⁺	⁺	⁺	⁺	⁺	⁺	142	IncFIB(S), IncFII(S)	+
N16 2042	Clinical	₋	₋	⁺	₋	⁺	₋	⁺	⁺	⁺	⁺	⁺	⁺	142	IncFIB(S), IncFII(S)	+
N16 1829	Clinical	₋	₋	⁺	⁺	⁺	₋	⁺	⁺	⁺	⁺	⁺	⁺	142	IncFIB(S), IncFII(S)	+
N16 1794	Clinical	⁺	₋	⁺	⁺	⁺	₋	⁺	⁺	⁺	⁺	⁺	⁺	142	IncFIB(S), IncFII(S)	+
N16 1788	Clinical	⁺	₋	⁺	⁺	⁺	₋	⁺	⁺	⁺	⁺	⁺	⁺	142	IncFIB(S), IncFII(S)	+
N16 1786	Clinical	₋	₋	⁺	⁺	⁺	₋	⁺	⁺	⁺	⁺	⁺	⁺	142	IncFIB(S), IncFII(S)	+
N16 1757	Clinical	₋	₋	⁺	⁺	⁺	₋	⁺	⁺	⁺	⁺	⁺	⁺	142	IncFIB(S), IncFII(S)	+
N16 1740	Clinical	₋	₋	⁺	⁺	⁺	₋	⁺	⁺	⁺	⁺	⁺	⁺	142	IncFIB(S), IncFII(S)	+
N16 1722	Clinical	⁺	₋	⁺	⁺	⁺	₋	⁺	⁺	⁺	⁺	⁺	⁺	142	IncFIB(S), IncFII(S)	+
N16 1715	Clinical	₋	₋	⁺	⁺	⁺	₋	⁺	⁺	⁺	⁺	⁺	⁺	142	IncFIB(S), IncFII(S)	+
N16 1675	Clinical	₋	₋	⁺	⁺	⁺	₋	⁺	⁺	⁺	⁺	⁺	⁺	142	IncFIB(S), IncFII(S)	+
N16 1250	Clinical	₋	₋	⁺	⁺	⁺	₋	⁺	⁺	⁺	⁺	⁺	⁺	142	IncFIB(S), IncFII(S)	+
N16 1158	Clinical	⁺	₋	₋	⁺	⁺	₋	⁺	⁺	⁺	⁺	⁺	⁺	142	IncFIB(S), IncFII(S)	+
N16 0656	Clinical	₋	₋	⁺	₋	⁺	₋	⁺	⁺	⁺	⁺	⁺	⁺	2640	IncFIB(S), IncFII(S)	+
N15 2358	Clinical	⁺	₋	⁺	₋	⁺	₋	⁺	⁺	⁺	⁺	⁺	⁺	377	IncFIB(S), IncFII(S)	+
N15 2285	Clinical	⁺	₋	⁺	⁺	⁺	₋	⁺	⁺	⁺	⁺	⁺	⁺	377	IncFIB(S), IncFII(S)	+
N15 1199	Food	₋	₋	⁺	₋	⁺	₋	⁺	⁺	⁺	⁺	⁺	⁺	377	IncFIB(S), IncFII(S)	+
N15 1120	Food	⁺	₋	⁺	⁺	⁺	₋	⁺	⁺	⁺	⁺	⁺	⁺	377	IncFIB(S), IncFII(S)	+
N15 1010	Food	₋	₋	⁺	⁺	⁺	₋	⁺	⁺	⁺	⁺	⁺	⁺	377	IncFIB(S), IncFII(S)	+
N15 0039	Food, Grain	₋	₋	⁺	⁺	⁺	₋	⁺	⁺	⁺	⁺	⁺	⁺	377	IncFIB(S), IncFII(S)	+
N14 2376	Food, Onion	₋	₋	⁺	⁺	⁺	₋	⁺	⁺	⁺	⁺	⁺	⁺	377	IncFIB(S), IncFII(S)	+
N14 1674	Clinical,blood	⁺	₋	⁺	⁺	⁺	₋	⁺	⁺	⁺	⁺	⁺	⁺	142	IncFIB(S), IncFII(S)	+
N14 1673	Clinical	⁺	₋	⁺	⁺	⁺	₋	⁺	⁺	⁺	⁺	⁺	⁺	142	IncFIB(S), IncFII(S)	+
N14 1285	Clinical	⁺	₋	⁺	⁺	⁺	₋	⁺	⁺	⁺	⁺	⁺	⁺	142	IncFIB(S), IncFII(S)	+
N14 1268	Clinical	⁺	₋	⁺	⁺	⁺	₋	⁺	⁺	⁺	⁺	⁺	⁺	142	IncFIB(S), IncFII(S)	+
N14 1267	Clinical	⁺	₋	₋	₋	⁺	₋	⁺	⁺	⁺	⁺	⁺	⁺	142	IncFIB(S), IncFII(S)	+
N14 1266	Clinical	⁺	₋	⁺	⁺	⁺	₋	⁺	⁺	⁺	⁺	⁺	⁺	142	IncFIB(S), IncFII(S)	+
N14 1255	Clinical	₋	₋	⁺	⁺	⁺	₋	⁺	⁺	⁺	⁺	⁺	⁺	142	IncFIB(S), IncFII(S)	+
N14 1252	Clinical	⁺	₋	⁺	⁺	⁺	₋	⁺	⁺	⁺	⁺	⁺	⁺	142	IncFIB(S), IncFII(S)	+
N14 1239	Clinical	₋	₋	⁺	₋	⁺	₋	⁺	⁺	⁺	⁺	⁺	⁺	142	IncFIB(S), IncFII(S)	+
N14 1238	Clinical	₋	₋	⁺	₋	⁺	₋	⁺	⁺	⁺	⁺	⁺	⁺	142	IncFIB(S), IncFII(S)	+
N14 1237	Clinical	₋	₋	⁺	₋	⁺	₋	⁺	⁺	⁺	⁺	⁺	⁺	142	IncFIB(S), IncFII(S)	+
N14 1233	Clinical	⁺	₋	⁺	⁺	⁺	₋	⁺	⁺	⁺	⁺	⁺	⁺	142	IncFIB(S), IncFII(S)	+
N14 1232	Clinical	⁺	₋	⁺	⁺	⁺	₋	⁺	⁺	⁺	⁺	⁺	⁺	142	IncFIB(S), IncFII(S)	+
N14 1222	Clinical	₋	₋	⁺	⁺	⁺	₋	⁺	⁺	⁺	⁺	⁺	⁺	142	IncFIB(S), IncFII(S)	+
N14 1217	Clinical	₋	₋	⁺	⁺	⁺	₋	⁺	⁺	⁺	⁺	⁺	⁺	142	IncFIB(S), IncFII(S)	+
N14 1212	Clinical	₋	₋	⁺	⁺	⁺	₋	⁺	⁺	⁺	⁺	⁺	⁺	142	IncFIB(S), IncFII(S)	+
N14 1194	Clinical	⁺	₋	⁺	⁺	⁺	₋	⁺	⁺	⁺	⁺	⁺	⁺	142	IncFIB(S), IncFII(S)	+
N14 1190	Clinical	₋	₋	⁺	⁺	⁺	₋	⁺	⁺	⁺	⁺	⁺	⁺	142	IncFIB(S), IncFII(S)	+
N14 1189	Clinical	⁺	₋	⁺	⁺	⁺	₋	⁺	⁺	⁺	⁺	⁺	⁺	142	IncFIB(S), IncFII(S)	+
Bovis 277	Clinical	₋	₋	⁺	⁺	⁺	₋	⁺	⁺	⁺	⁺	⁺	⁺	1499	IncFIB(S), IncFII(S)	+
N17 1364	Clinical	⁺	₋	⁺	₋	⁺	₋	⁺	⁺	⁺	⁺	⁺	⁺	2640	IncFIB(S), IncFII(S), IncI1	+
N16 2574	Clinical	⁺	₋	⁺	⁺	⁺	₋	⁺	⁺	⁺	⁺	⁺	⁺	142	IncFIB(S), IncFII(S), IncI1, IncI2	+
N17 1212	Clinical	⁺	₋	⁺	⁺	⁺	₋	⁺	⁺	⁺	⁺	⁺	⁺	2640	IncFIB, IncFII	+
bovis3114(Chr+ plasmid)																+
sal610	Clinical	₋	₋	⁺	₋	⁺	₋	⁺	⁺	⁺	⁺	⁺	⁺	377	IncFIB(S), IncFII(S)	not done
Function Category		5	14	15	17	18	8	9	10	11	12	13	1

## Sheet: Phage Table
Number of Intact Phage regions present in each Salmonella enterica serotype Bovismorbificans sequence type
	ST
Phage name	142	2640	377	1499	Total Number of Each Phage Genomic Regions
PHAGE_Phage_Gifsy_1_NC_010392	56	8	54	12	130
PHAGE_Phage_Gifsy_2_NC_010393	0	0	0	12	12
PHAGE_Vibrio_X29_NC_024369	37	5	0	0	42
PHAGE_Salmon_118970_sal3_NC_031940	37	5	13	1	56
PHAGE_Salmon_SPN1S_NC_016761	0	0	0	1	1
PHAGE_Salmon_vB_SemP_Emek_NC_018275	0	0	0	1	1
PHAGE_Salmon_Fels_2_NC_010463	0	0	1	1	2
PHAGE_Salmon_RE_2010_NC_019488	0	0	19	0	19
PHAGE_Salmon_SP_004_NC_021774	0	0	0	1	1
PHAGE_Entero_186_NC_001317	0	0	1	0	1
PHAGE_Entero_mEp460_NC_019716	0	0	1	0	1
PHAGE_Entero_PsP3_NC_005340	0	0	8	3	11
PHAGE_Entero_SfV_NC_003444	0	0	2	0	2
PHAGE_Entero_fiAA91_ss_NC_022750	0	0	0	2	2
PHAGE_Entero_WPhi_NC_005056	0	0	0	1	1
PHAGE_Haemop_HP2_NC_003315	0	0	4	3	7
PHAGE_Klebsi_phiKO2_NC_005857	0	0	1	0	1
PHAGE_Edward_GF_2_NC_026611	0	0	0	1	1
PHAGE_Shigel_SfII_NC_021857	0	0	0	1	1
PHAGE_Yersin_L_413C_NC_004745	0	0	0	1	1
Totals	130	18	104	41	293
