# Supplementary material for: Phylogenomic Analysis of Salmonella enterica subsp. enterica Serovar Bovismorbificans from Clinical and Food Samples Using Whole Genome Wide Core Genes and kmer Binning Methods to Identify Two Distinct Polyphyletic Genome Pathotypes
Source: Microorganisms. 2022 Jun 11;10(6):1199. doi: 10.3390/microorganisms10061199 (PMC9228720; doi:10.3390/microorganisms10061199)
Supplement: Supplementary file 1 [file microorganisms-10-01199-s001.zip › Supplemental_File_S6.xlsx]

## Sheet: Title Page
Supplemental_File_S4
2650 core genes developed for this study using 645 complete genomes and 80+ S. Bovismorbificans WGS assemblies
are listed. The IDs, genome coordinates and annotations are based on the LT2 genome (# NC_003197) from GenBank.

## Sheet: Core Genes 
Locus	Start	End	Strand	Protein_product
STM0002_thrA	325	2799	+	aspartokinase I
STM0003	2789	3730	+	homoserine kinase
STM0005	5114	5898	-	putative cytoplasmic protein
STM0006	5966	7407	-	putative alanine/glycine transport protein
STM0007	7652	8618	+	transaldolase B
STM0009	9376	9950	-	putative regulatory protein
STM0010	10092	10811	-	positive sigma H regulator
STM0011	10841	11255	-	putative periplasmic protein
STM0012	11579	13509	+	chaperone Hsp70
STM0013	13577	14734	+	heat shock protein DnaJ
STM0016	16493	17033	-	hypothetical protein
STM0017	17043	17493	-	putative protein
STM0021	24462	25011	+	fimbrial subunit
STM0022	25105	25798	+	fimbrial chaparone
STM0028	31270	32119	+	putative thiol-disulfide isomerase
STM0038	44305	46027	+	putative arylsulfatase
STM0039	46083	47356	+	NhaA family of transport protein, Na+/H antiporter, pH dependent
STM0040	47407	48317	+	transcriptional activator of nhaA
STM0041	48372	50417	-	putative glycosyl hydrolase
STM0042	50451	51829	-	putative sodium galactoside symporter
STM0043	52280	52550	-	30S ribosomal subunit protein S20
STM0045	52872	53810	+	flavokinase and FAD synthetase
STM0046	53838	56689	+	isoleucine tRNA synthetase
STM0049	57782	58746	+	regulates the activity of guanosine 3',5'-bispyrophosphate synthetase I (RelA)
STM0052	61106	61797	-	putative transcription regulator sensor for citrate
STM0053	61794	63413	-	putative transcription regulator
STM0062	72394	72951	+	putative cytoplasmic protein
STM0063	72923	73837	+	putative modifier of citrate lyase protein
STM0068	80459	80943	+	transcriptional regulator of cai and fix operon
STM0070	81725	82523	-	carnitine racemase
STM0073	85509	86662	-	putative acyl-CoA dehydrogenase, carnitine metabolism
STM0074	86686	88216	-	putative BCCT family betaine/carnitine/choline transport protein
STM0075	88547	89454	+	putative flavoprotein reductase, carnitine metabolism
STM0079	92166	93518	+	putative MFS family transport protein
STM0080	93601	93837	+	putative outer membrane lipoprotein
STM0084	95952	97848	+	putative sulfatase
STM0086	98765	100640	+	CPA2 family K+ efflux antiporter, glutathione-regulated
STM0087	100826	101318	+	dihydrofolate reductase type I
STM0088	101424	102272	-	diadenosine tetraphosphatase
STM0089	102283	102674	-	putative cytoplasmic protein
STM0090	102663	103484	-	S-adenosylmethionine-6-N',N'-adenosyl (rRNA) dimethyltransferase; kasugamycin resistance
STM0091	103481	104470	-	NAD-dependent dehydrogenase/carboxylase
STM0092	104470	105767	-	peptidyl-prolyl cis-trans isomerase
STM0094	108413	109236	+	DnaJ like chaperone protein
STM0095	109331	110002	-	23S rRNA pseudouridylate 746 synthase
STM0096	110002	112908	-	RNA polymerase associated protein
STM0097	113082	115445	-	DNA polymerase II
STM0103	119590	121412	-	L-ribulokinase
STM0105	122593	123371	+	putative DedA family membrane protein
STM0107	124101	125728	-	putative binding-protein-dependent transport system inner membrane component
STM0108	125687	126680	-	thiamine-binding periplasmic protein
STM0109	126848	128522	-	putative periplasmic binding protein of transport system
STM0112	131076	132181	-	3-isopropylmalate dehydrogenase
STM0113	132167	133758	-	2-isopropylmalate synthase
STM0115	134557	135513	+	putative LysR family transcriptional regulator
STM0116	135770	137559	+	valine sensitive acetolactate synthase III, large subunit
STM0117	137550	138053	+	acetolactate synthase III, small subunit
STM0118	138326	139341	+	transcriptional repressor of fru operon and others
STM0119	139931	140405	+	putative cytoplasmic protein
STM0120	140388	141348	+	putative S-adenosyl methionine adenyltransferase
STM0121	141333	141710	+	cell division protein
STM0122	141709	143492	+	division specific transpeptidase
STM0123	143469	144966	+	UDP-N-acetylmuramoylalanyl-D-glutamate 2,6-diaminopimelate ligase
STM0124	144949	146321	+	D-alanine:D-alanine-adding enzyme
STM0125	146301	147397	+	phospho-N-acetylmuramoyl-pentapeptide transferase
STM0126	147386	148716	+	UDP-N-acetylmuramoylalanine-D-glutamate ligase
STM0127	148702	149960	+	essential cell division gene
STM0128	149947	151024	+	UDP-N-acetylglucosamine:N-acetylmuramyl-(pentapeptide) pyrophosphoryl-undecaprenol N-acetylglucosamine transferase
STM0129	151131	152618	+	L-alanine adding enzyme
STM0130	152595	153531	+	D-alanine-D-alanine ligase B
STM0131	153375	154363	+	cell division protein
STM0132	154346	155622	+	ATP-binding cell division protein
STM0134	156919	157852	+	UDP-3-O-acyl N-acetylglucosamine deacetylase
STM0135	158199	158627	+	putative inner membrane protein
STM0136	158689	161394	+	preprotein translocase; secretion protein of IISP family
STM0138	162263	162465	-	putative cytoplasmic protein
STM0139	162464	163221	-	putative cytoplasmic protein
STM0140	163207	163835	-	putative nucleotide kinase
STM0141	164040	165096	+	GMP reductase
STM0142	165127	166342	-	putative component in type IV pilin biogenesis
STM0143	166319	167715	-	putative integral membrane protein
STM0144	167714	168163	-	prelipin peptidase dependent protein
STM0145	168373	169279	-	quinolinate phosphoribosyltransferase
STM0146	169341	169917	+	N-acetyl-anhydromuramyl-L-alanine amidase
STM0147	169903	170768	+	putative transmembrane protein
STM0149	171810	173227	-	putative permease of the Na+:galactoside symporter family
STM0150	173380	174812	-	APC family aromatic amino acid transporter
STM0151	175153	176080	+	transcriptional repressor for pyruvate dehydrogenase complex (GntR family)
STM0154	180898	182431	+	lipoamide dehydrogenase (NADH)
STM0156	183042	183840	-	putative periplasmic protein
STM0161	190186	191153	+	2-keto-3-deoxygluconate permease
STM0162	191145	192421	+	putative inner membrane protein
STM0163	192403	193394	+	pyridoxine phosphate biosynthetic protein
STM0164	193399	194171	+	putative LysR family transcriptional regulator
STM0165	194201	195011	-	S-adenosylmethionine decarboxylase, proenzyme
STM0166	195016	195889	-	spermidine synthase
STM0167	195983	196342	-	putative periplasmic protein
STM0168	196520	198142	+	putative multicopper oxidase
STM0170	200804	201352	+	hypoxanthine phosphoribosyltransferase
STM0171	201410	202088	-	putative carbonic anhydrase
STM0185	215433	216374	-	putative glutamyl t-RNA synthetase
STM0186	216398	216866	-	dnaK suppressor protein
STM0187	217030	217745	-	regulator for maltose metabolism
STM0190	220911	223446	+	transpeptidase of penicillin-binding protein 1b
STM0193	226774	227664	+	hydroxamate-dependent iron uptake
STM0203	238662	240083	+	putative ClC family chlorine transport protein
STM0204	240120	240509	+	putative HesB-like domain protein
STM0205	240610	241247	-	putative inner membrane protein
STM0206	241270	242077	-	putative cobalamin periplasmic binding protein
STM0208	242840	244363	+	deoxyguanosine triphosphate triphosphohydrolase
STM0209	244493	245920	+	periplasmic serine protease Do, heat shock protein
STM0210	246061	247230	+	putative inner membrane protein
STM0211	247319	247717	-	putative cytoplasmic protein
STM0213	249290	250114	-	2,3,4,5-tetrahydropyridine-2-carboxylate N-succinyltransferase
STM0214	250144	252825	-	uridylyltransferase
STM0215	253053	253860	-	methionine aminopeptidase
STM0216	254285	255023	+	30S ribosomal subunit protein S2
STM0217	255269	256132	+	protein chain elongation factor EF-Ts
STM0218	256265	257002	+	uridylate kinase
STM0219	257136	257706	+	ribosome releasing factor
STM0220	257836	259043	+	1-deoxy-D-xylulose 5-phosphate reductoisomerase
STM0221	259337	260114	+	undecaprenyl pyrophosphate synthetase (di-trans, poly-cis-decaprenylcistransferase)
STM0222	260114	260984	+	CDP-diglyceride synthase
STM0223	260988	262348	+	putative membrane-associated Zn-dependent protease
STM0225	264905	265402	+	histone-like protein, located in outer membrane
STM0226	265391	266431	+	UDP-3-O-(3-hydroxymyristoyl)-glucosamine n-acyltransferase
STM0227	266524	266992	+	(3R)-hydroxymyristol acyl carrier protein dehydratase
STM0228	266984	267784	+	UDP-N-acetylglucosamine acetyltransferase
STM0229	267768	268932	+	tetraacyldisaccharide-1-P
STM0230	268915	269525	+	RNAse HII
STM0231	269536	273031	+	DNA polymerase III, alpha subunit
STM0232	272938	274003	+	acetylCoA carboxylase, carboxytransferase component, alpha subunit
STM0233	274177	275947	+	putative endochitinase
STM0235	278209	278609	+	putative lactoylglutathione lyase
STM0237	280048	280321	-	modulator of Rho-dependent transcription termination
STM0239	280680	281238	+	putative cytoplasmic protein
STM0240	281220	281657	+	putative-tRNA hydrolase domain protein
STM0242	282468	284202	-	proline tRNA synthetase
STM0243	284297	285012	-	putative regulator
STM0244	285001	285416	-	regulator in colanic acid synthesis
STM0245	285524	286351	-	putative outer membrane lipoprotein
STM0246	286378	287044	-	putative ABC superfamily (membrane) transport protein
STM0258	298241	299020	+	putative cytoplasmic protein
STM0260	299924	301291	-	transcriptional regulator for nitrite reductase (cytochrome c552)
STM0261	301363	302128	-	hydroxyacylglutathione hydrolase
STM0262	302140	302875	+	putative SAM-dependent methyltransferase
STM0263	302872	303356	-	RNase HI
STM0271	309925	310832	-	putative cytoplasmic protein
STM0272	311190	313834	+	putative ATPase with chaperone activity
STM0306	349894	350619	-	homolog of sapA
STM0307	350944	351358	-	homology to Shigella VirG protein
STM0308	351722	352503	-	putative amidohydrolase
STM0309	352598	355058	-	putative acyl-CoA dehydrogenase
STM0310	355270	355860	+	phosphoheptose isomerase
STM0311	356063	356840	+	putative glutamine amidotransferase
STM0312	356811	357565	-	putative periplasmic protein
STM0313	357788	358856	+	DNA polymerase IV
STM0316	360974	362444	-	aminoacyl-histidine dipeptidase (peptidase D)
STM0317	362662	363138	+	guanine-hypoxanthine phosphoribosyltransferase
STM0318	363212	364471	+	putative hydrolase of the alpha/beta superfamily
STM0319	364517	364930	+	transcriptional regulator of cryptic csgA gene for curli surface fibers
STM0320	364981	366179	-	outer membrane pore protein e (e,ic,nmpab)
STM0321	366309	367419	+	gamma-glutamate kinase
STM0322	367418	368681	+	gamma-glutamylphosphate reductase
STM0337	379706	381038	-	putative fimbriae; usher
STM0338	381036	383603	-	putative fimbriae; usher
STM0339	383581	384357	-	putative fimbriae; chaparone
STM0340	384404	384948	-	putative fimbriae; major subunit
STM0346	390383	390913	+	putative outer membrane protein; homolog of ail and ompX
STM0347	391057	391698	+	putative response regulator
STM0348	391703	391933	+	putative inner membrane protein
STM0349	391984	392350	+	putative outer membrane lipoprotein
STM0351	393894	397067	-	putative cation efflux system protein
STM0352	397058	398290	-	putative cation efflux pump
STM0353	398554	400849	+	putative cation transport ATPase
STM0354	400853	401325	+	putative transcriptional regulator
STM0355	401396	401597	+	putative copper chaperone
STM0356	401883	403143	+	putative inner membrane protein
STM0357	403326	405290	+	DNA methylase; restriction system
STM0358	405293	408272	+	DNA restriction (DNA helicase)
STM0359	408544	408650	+	putative cytoplasmic protein
STM0360	408761	410170	+	cytochrome BD2 subunit I
STM0361	410159	411177	+	cytochrome BD2 subunit II
STM0362	411177	411308	+	putative cytoplasmic protein
STM0364	412664	414772	+	ferrioxamine receptor
STM0365	414813	415461	-	putative transport protein
STM0366	415665	415952	+	putative periplasmic protein
STM0367	416088	417730	-	regulator for prp operon (EBP family)
STM0368	417967	418865	+	putative carboxyphosphonoenolpyruvate mutase
STM0372	423679	424663	-	5-aminolevulinate dehydratase (porphobilinogen synthase)
STM0374	428177	428811	+	putative inner membrane protein
STM0376	430348	431580	+	putative ABC superfamily transporter
STM0377	431584	432689	+	putative outer membrane lipoprotein
STM0380	433544	434656	-	D-alanine-D-alanine ligase A
STM0382	435598	436809	+	putative permease
STM0383	437092	437366	+	putative cytoplasmic protein
STM0385	438111	439242	+	putative diguanylate cyclase/phosphodiesterase domain 1
STM0386	439257	440080	-	pyrroline-5-carboxylate reductase
STM0387	440194	440661	+	putative cytoplasmic protein
STM0388	440687	441391	+	shikimate kinase II
STM0389	441407	441609	+	putative cytoplasmic protein
STM0390	441846	442537	+	protein of aro operon, regulated by aroR
STM0392	442930	443853	-	putative exonuclease involved in removal of stalled replication fork
STM0393	443955	444875	+	putative sugar kinase/putative transcriptional regulator (NagC/XylR family)
STM0395	446242	449396	-	ATP-dependent dsDNA exonuclease
STM0397	450723	451485	+	response regulator in two-component regulatory system with PhoR (or CreC)
STM0398	451540	452850	+	sensory kinase in two-component regulatory system with PhoB, regulates pho regulon
STM0399	453243	454578	+	LIVCS family, branched chain amino acid transporter system II (LIV-II)
STM0400	454644	456023	+	putative APC family, proline transporter
STM0402	458074	458684	-	putative thiol - alkyl hydroperoxide reductase
STM0403	458886	459478	-	putative cytoplasmic protein
STM0404	459561	460625	+	S-adenosylmethionine-tRNA ribosyltransferase-isomerase
STM0405	460811	461949	+	tRNA-guanine transglycosylase
STM0407	462320	464179	+	preprotein translocase, IISP family, part of the channel
STM0408	464178	465161	+	preprotein translocase, IISP family, membrane subunit
STM0411	466546	466909	+	putative cytoplasmic protein
STM0412	467157	467483	-	putative inner membrane protein
STM0413	467538	468539	-	nucleoside channel; receptor of phage T6 and colicin K
STM0414	468701	469255	-	putative outer membrane lipoprotein
STM0415	469381	469841	+	putative transcriptional regulator
STM0416	469833	470948	+	pyrimidine deaminase
STM0417	471023	471507	+	riboflavin synthase, beta chain
STM0418	471516	471947	+	transcription termination; L factor
STM0420	472970	473496	+	phosphatidylglycerophosphatase A
STM0422	474631	476493	-	1-deoxyxylulose-5-phosphate synthase; flavoprotein
STM0423	476517	477431	-	geranyltranstransferase (farnesyldiphosphate synthase)
STM0426	479361	480165	-	2-aminoethylphosphonate transporter, memrane component
STM0427	480161	481027	-	2-aminoethylphosphonate transporter, memrane component
STM0428	481024	482133	-	2-aminoethylphosphonate transporter ATPase component
STM0429	482139	483157	-	2-aminoethylphosphonate transporter, periplasmic-binding component
STM0430	483350	484085	-	2-aminoethylphosphonate transport, repressor
STM0433	486228	486831	-	4-methyl-5(beta-hydroxyethyl)-thiazole synthesis
STM0434	486781	487703	-	ketopantoate reductase
STM0435	487800	488309	+	putative cytoplasmic protein
STM0436	488356	489705	-	IS903 transposase
STM0439	493355	494254	-	protohaeme IX farnesyltransferase (haeme O biosynthesis)
STM0441	494586	495212	-	cytochrome o ubiquinol oxidase subunit III
STM0442	495190	497193	-	cytochrome o ubiquinol oxidase subunit I
STM0443	497192	498229	-	cytochrome o ubiquinol oxidase subunit II
STM0444	498601	500094	-	MFS family, muropeptide transporter
STM0445	500120	500760	-	putative lipoprotein
STM0446	500990	501319	+	morphogene; putative regulator of murein genes (BolA family)
STM0447	501655	502964	+	peptidyl-prolyl cis/trans isomerase
STM0448	503199	503834	+	proteolytic subunit of clpA-clpP ATP-dependent serine protease
STM0449	504073	505357	+	specificity component of clpA-clpP ATP-dependent serine protease, chaperone
STM0450	505532	507897	+	DNA-binding protein
STM0451	508058	508378	+	DNA-binding protein HU-beta, NS1 (HU-1)
STM0452	508651	510540	+	peptidyl prolyl isomerase
STM0453	510676	511064	+	putative DNA uptake protein and related DNA-binding proteins
STM0454	511154	511566	+	putative esterase
STM0455	511672	512377	-	putative (aluminum) resistance protein
STM0456	512432	514142	-	putative ABC transporter periplasmic binding protein
STM0457	514221	515051	+	putative hydrolase
STM0458	515101	516161	-	putative cysteine synthase/cystathionine beta-synthase
STM0459	516258	516727	+	putative transcriptional regulator (AsnC family)
STM0461	518520	520314	+	putative ABC superfamily (atp&membrane) transporter
STM0462	520515	520865	+	regulatory protein P-II 2
STM0463	520883	522183	+	putative Amt family, ammonium transport protein
STM0464	522283	523156	-	acyl-CoA thioesterase II
STM0465	523346	523927	+	glycoprotein/polysaccharide metabolism
STM0466	523960	524359	-	putative methyltransferase
STM0468	524580	526142	-	putative diguanylate cyclase/phosphodiesterase domain 2
STM0469	526346	526615	+	putative 50S ribosomal protein L31 (second copy)
STM0470	526616	526761	+	putative 50S ribosomal protein L36 (second copy)
STM0471	526817	527297	-	putative inner membrane protein
STM0472	527404	527969	-	maltose o-acetyltransferase
STM0473	528134	528364	-	hemolysin expression modulating protein (involved in environmental regulation of virulence factors)
STM0474	528380	528767	-	putative cytoplasmic protein
STM0475	529250	532415	-	RND family, acridine efflux pump
STM0476	532422	533626	-	acridine efflux pump
STM0477	533757	534410	+	acrAB operon repressor (TetR/AcrR family)
STM0478	534529	537891	+	putative small-conductance mechanosensitive channel
STM0480	538938	539116	-	putative inner membrane protein
STM0482	539715	540092	+	putative phage gene 58
STM0483	540232	540796	+	adenine phosphoribosyltransferase
STM0484	540910	542838	+	DNA polymerase III, tau and gamma subunits
STM0485	542874	543213	+	putative cytoplasmic protein
STM0486	543199	543818	+	putative recombination protein, gap repair
STM0487	543905	545803	+	chaperone Hsp90, heat shock protein C 62.5
STM0488	546029	546688	+	adenylate kinase
STM0489	546908	547879	+	ferrochelatase
STM0490	547876	548859	-	acetyl esterase
STM0491	549000	550304	+	inosine-guanosine kinase
STM0492	550353	552040	-	putative CPA2 family transport protein
STM0493	552244	553464	-	putative MFS family of transport protein
STM0494	553624	555289	+	UDP-sugar hydrolase 5'-nucleotidase
STM0495	555406	555895	-	putative cytoplasmic protein
STM0496	556087	556893	-	putative cytoplasmic protein
STM0498	557948	560463	-	putative copper-transporting ATPase
STM0499	560548	560975	+	putative heavy metal transcriptional repressor (MerR family)
STM0500	560976	561440	-	putative membrane protein implicated in regulation of membrane protease activity
STM0501	561425	562356	-	putative inner membrane protein
STM0502	562474	563166	+	putative ABC-type sugar/spermidine/putrescine transport system, ATPase component
STM0503	563140	563932	+	putative YbbM family transport protein, metal resistance protein
STM0504	564018	564872	-	putative thioredoxin protein
STM0505	564932	565713	-	putative oxidoreductase
STM0506	565857	566488	-	multifunctional acyl-CoA thioesterase I; also functions as protease I, lysophospholipaseL(I)
STM0507	566430	567128	+	putative ABC superfamily (atp_bind) transporter
STM0508	567114	569539	+	putative inner membrane protein
STM0509	569718	570858	+	putative outer membrane protein
STM0510	571109	571945	+	putative ABC-type transport system ATPase component/cell division protein
STM0511	571975	572998	+	putative ABC-type transport system ATPase component/cell division protein
STM0512	572984	573650	+	putative binding-protein-dependent transport systems inner membrane component
STM0513	573689	574801	-	putative ATPase
STM0533	596055	597134	-	phosphoribosylaminoimidazole carboxylase = AIR carboxylase, CO(2)-fixing subunit
STM0536	598471	598977	-	peptidyl-prolyl cis-trans isomerase B (rotamase B)
STM0537	599126	600523	+	cysteine tRNA synthetase
STM0541	602491	602715	-	putative cytoplasmic protein
STM0542	602705	603588	-	5,10-methylene-tetrahydrofolate dehydrogenase
STM0546	606039	608663	+	outer membrane usher protein
STM0548	609684	610213	+	putative fimbrial protein
STM0549	610259	610904	-	fimbrial protein Z
STM0559	617363	617725	-	putative glycosyl translocase
STM0564	620318	621656	+	putative oxidoreductase
STM0567	622701	623882	-	putative ATPase involved in DNA repair
STM0568	624190	625596	+	APC family, phenylalanene transporter
STM0569	625638	626896	-	putative transport
STM0579	637781	638160	-	putative cytoplasmic protein
STM0580	638149	638735	-	putative regulatory protein
STM0581	639012	639360	+	putative regulatory protein
STM0582	639366	639614	-	putative inner membrane protein
STM0583	639681	640799	-	putative cytoplasmic protein
STM0585	641561	643981	-	outer membrane porin, receptor for ferric enterobactin (enterochelin) and colicins B and D
STM0586	643995	645219	+	enterochelin esterase
STM0588	645454	649349	+	enterobactin synthetase, component F (nonribosomal peptide synthetase)
STM0591	651579	652584	-	ferric enterobactin transporter
STM0593	653675	654930	+	putative POT family transport protein
STM0595	656212	657433	+	isochorismate synthetase, enterochelin biosynthesis
STM0596	657432	659053	+	2,3-dihydroxybenzoate-AMP ligase
STM0599	660668	661095	+	putative protein PaaI, possibly involved in aromatic compounds catabolism
STM0600	661264	663382	+	carbon starvation protein
STM0601	663439	663643	+	putative cytoplasmic protein
STM0608	670350	671015	+	alkyl hydroperoxide reductase, C22 subunit
STM0609	671245	672822	+	alkyl hydroperoxide reductase, F52a subunit
STM0612	675977	676540	+	putative hydrogenase protein
STM0614	677375	677818	-	putative universal stress protein UspA and related nucleotide-binding protein
STM0615	678015	679264	+	putative dehydrogenase
STM0616	679347	679769	-	regulator of nucleoside diphosphate kinase
STM0617	679992	680798	-	RNase I
STM0618	680908	682385	-	DASS family, citrate:succinate transport (antiport) protein
STM0619	682409	683318	-	putative modifier of citrate lyase protein
STM0622	685371	686290	-	citrate lyase beta chain (acyl lyase subunit)
STM0623	686276	686582	-	citrate lyase acyl carrier protein (gamma chain)
STM0624	686569	687661	-	citrate lyase synthetase (citrate (pro-3S)-lyase ligase
STM0625	688019	689691	+	sensory histidine kinase in two-component regulatory system with DpiA
STM0626	689647	690340	+	response regulator in two-component regulatory system with DpiB
STM0627	690394	691790	-	DcuC family, dicarboxylate transporter
STM0629	692906	693127	+	RNA chaperone, negative regulator of cspA transcription
STM0630	693185	693580	-	high-copy crc-csp restores normal chromosome condensation in presence of camphor or mukB mutations
STM0631	693642	694447	+	putative hydrolase
STM0632	694567	694779	+	putative Sec-independent protein secretion pathway component
STM0633	694865	695846	-	lipoate synthase, an iron-sulfur enzyme
STM0634	696036	697002	-	putative LysR family transcriptional regulator
STM0635	697291	697872	-	putative ligase in lipoate biosynthesis
STM0637	698404	699615	-	D-alanyl-D-alanine carboxypeptidase, penicillin-binding protein 5
STM0639	700911	702037	-	rod shape-determining membrane protein; cell elongation in e phase
STM0640	702026	703945	-	cell elongation specific transpeptidase of penicillin-binding protein 2 (peptidoglycan synthetase)
STM0641	703958	704438	-	putative cytoplasmic protein
STM0642	704429	704758	-	putative ACR, homolog of plant Iojap protein
STM0643	705075	705693	-	alpha ribazole-5'-P phosphatase in cobalamin synthesis
STM0644	705773	706874	+	putative aminotransferase in cobalamin synthesis
STM0645	706849	707499	-	putative nicotinic acid mononucleotide adenylyltransferase
STM0646	707492	708523	-	DNA polymerase III, delta subunit
STM0647	708523	709121	-	a minor lipoprotein
STM0648	709128	711727	-	leucine tRNA synthetase
STM0649	711947	712288	+	putative hydrolase N-terminus
STM0650	712300	713477	+	putative hydrolase C-terminus
STM0651	713522	714480	+	putative permease
STM0652	714541	716476	+	putative sigma-54 dependent transcriptional regulator
STM0663	727338	728026	-	glutamate/aspartate transporter
STM0664	728012	728765	-	glutamate/aspartate transporter
STM0665	728912	729847	-	glutamate/aspartate transporter
STM0666	730175	731724	-	apolipoprotein N-acyltransferase
STM0667	731733	732629	-	putative CBS domain-containing protein
STM0668	732769	733259	-	putative metal-dependent hydrolase
STM0669	733239	734331	-	putative phosphate starvation-inducible protein, ATP-binding
STM0670	734490	735914	-	methylthiolation of isopentenylated A37 derivatives in rRNA
STM0682	741695	742921	-	transcriptional repressor of nag (N-acetylglucosamine) operon (NagC/XylR family)
STM0683	742920	744086	-	N-acetylglucosamine-6-phosphate deacetylase
STM0684	744134	745013	-	glucosamine-6-phosphate deaminase
STM0685	745168	747213	+	Sugar Specific PTS family, n-acetylglucosamine-specific enzyme IIABC
STM0686	747412	749091	+	glutamine tRNA synthetase
STM0687	749525	750943	+	putative outer membrane protein
STM0688	750981	751325	+	putative lipoprotein
STM0689	751374	752685	-	citrate-proton symporter
STM0690	752729	753875	-	citrate utilization protein b
STM0691	753855	755263	-	putative periplasmic protein
STM0692	755356	756295	-	putative LysR family transcriptional regulator
STM0693	756397	757003	-	transcriptional repressor of iron-responsive genes (Fur family) (ferric uptake regulator)
STM0694	757131	757676	-	flavodoxin 1
STM0695	757812	758122	-	LexA regulated, putative SOS response
STM0696	758239	759009	-	putative enzyme
STM0697	759184	759736	+	negative modulator of initiation of replication
STM0699	761516	762001	-	putative cytoplasmic protein
STM0700	762066	763399	-	APC family, putrescine/ornithine antiporter
STM0701	763382	765590	-	ornithine decarboxylase isozyme, inducible
STM0702	766342	767027	-	response regulator in two-component regulatory system with KdpD
STM0703	767016	769717	-	sensory kinase in two-component regulatory system wtih KdpE
STM0704	769697	770291	-	P-type ATPase, high-affinity potassium transport system, C chain
STM0705	770290	772353	-	P-type ATPase, high-affinity potassium transport system, B chain
STM0706	772359	774130	-	P-type ATPase, high-affinity potassium transport system, A chain
STM0710	776241	777733	-	putative POT family transport protein
STM0711	778039	778794	+	putative cytoplasmic protein
STM0712	778799	779466	+	putative carboxylase
STM0714	780368	781116	+	putative lactam utilization protein
STM0729	794774	795833	-	putative transport protein
STM0730	795957	797303	-	citrate synthase
STM0731	797200	797586	+	putative inner membrane protein
STM0732	797906	798384	+	succinate dehydrogenase, cytochrome b556
STM0733	798365	798725	+	succinate dehydrogenase, hydrophobic subunit
STM0734	798708	800491	+	succinate dehydrogenase, flavoprotein subunit
STM0735	800494	801224	+	succinate dehydrogenase, Fe-S protein
STM0736_sucA	801627	804549	+	2-oxoglutarate dehydrogenase decarboxylase component
STM0737	804553	805772	+	2-oxoglutarate dehydrogenase (dihydrolipoyltranssuccinase E2 component)
STM0738	805897	807080	+	succinyl-CoA synthetase, beta subunit
STM0740	809352	811100	+	cytochrome d terminal oxidase, polypeptide subunit I
STM0741	811103	812255	+	cytochrome d terminal oxidase polypeptide subunit II
STM0743	812505	812801	+	putative inner membrane lipoprotein
STM0745	813417	814123	+	tol protein, membrane-spanning inner membrane protein
STM0746	814115	814555	+	tol protein, role in outer membrane integrity
STM0748	815950	817259	+	tol protein required for outer membrane integrity
STM0750	817819	818616	+	putative periplasmic protein
STM0757	821292	822023	+	NMN family, nucleoside/purine/pyrimidine transporter
STM0758	822020	822971	-	putative CDF family transport protein
STM0759	823069	823467	-	putative homeobox protein
STM0760	823653	824827	+	3-deoxy-D-arabinoheptulosonate-7-phosphate synthase (DAHP synthetase, phenylalanine repressible)
STM0771	835495	836275	+	putative ABC-type cobalamin/Fe3+-siderophores transport system, ATPase component
STM0772	836366	837131	-	phosphoglyceromutase 1
STM0773	837342	838395	-	galactose-1-epimerase (mutarotase)
STM0774	838376	839537	-	galactokinase
STM0775	839527	840585	-	galactose-1-phosphate uridylyltransferase
STM0776	840584	841667	-	UDP-galactose 4-epimerase
STM0779	844445	845245	-	transcriptional repressor of modABCD operon (molybdate uptake)
STM0781	845608	846451	+	molybdate transporter
STM0782	846432	847140	+	molybdate transporter
STM0783	847129	848201	+	molybdate transporter
STM0785	849173	850179	+	putative 3-carboxymuconate cyclase
STM0786	850323	851618	-	putative pectinesterase
STM0788	853057	854005	+	formimionoglutamate hydrolase
STM0789	854043	854775	+	histidine utilization repressor
STM0791	856651	858178	+	histidine ammonia lyase
STM0792	858263	858750	-	putative phospholipid-binding protein
STM0793	858797	860137	-	7,8-diaminopelargonic acid synthetase
STM0794	860127	861213	+	biotin synthetase
STM0795	861199	862367	+	7-keto-8-aminopelargonic acid synthetase
STM0797	863083	863785	+	dethiobiotin synthetase
STM0798	864348	866457	+	UvrB with UvrAC is a DNA excision repair enzyme
STM0801	869336	870255	-	putative cytoplasmic protein
STM0802	870632	871630	+	molybdopterin biosynthesis, protein A
STM0803	871639	872164	+	molybdopterin biosynthesis, protein B
STM0804	872156	872652	+	molybdopterin biosynthesis, protein C
STM0806	872879	873344	+	molybdopterin converting factor, subunit 2
STM0807	873380	874096	+	putative permease
STM0811	876153	877131	-	putative negative regulator
STM0812	877115	878370	-	cardiolipin (CL) synthase
STM0813	878353	879121	-	putative cytoplasmic protein
STM0814	879231	879654	+	putative inner membrane protein
STM0815	879616	880732	-	putative ABC superfamily (membrane) transport protein
STM0816	880838	881981	-	putative ABC superfamily (membrane) transport protein
STM0817	881961	883707	-	putative ABC-type multidrug transport system, ATPase component
STM0818	883690	884700	-	membrane permease predicted cation efflux pump
STM0819	884685	885370	-	putative transcriptional repressor (TetR/AcrR family)
STM0821	887150	889305	+	LexA regulated (SOS) repair enzyme
STM0823	890465	890737	-	putative periplasmic protein
STM0826	891469	892407	+	putative SAM-dependent methyltransferase
STM0827	892404	894634	-	putative transport protein
STM0828	894745	895482	-	glutamine high-affinity transporter
STM0829	895464	896135	-	glutamine high-affinity transporter
STM0830	896267	897024	-	glutamine high-affinity transporter
STM0831	897490	898127	-	stress response DNA-binding protein; starvation induced resistance to H2O2
STM0832	898296	899194	-	putative permease
STM0833	899528	900052	+	outer membrane protease, receptor for phage OX2
STM0834	900115	901702	-	putative integral membrane protein
STM0835	902263	902747	+	putative Mn-dependent transcriptional regulator
STM0836	902728	903856	+	putative di- and tricarboxylate transporters
STM0837	903900	904836	-	putative periplasmic protein
STM0841	908936	910210	-	putative cytoplasmic protein
STM0842	910450	911272	+	putative hydrolase of the HAD superfamily
STM0844	913788	914697	-	putative pyruvate formate lyase activating enzyme
STM0847	917139	918093	+	putative asparaginase
STM0848	918092	919975	+	putative ATPase components of ABC-type transport system, containing duplicated ATPase domain
STM0849	919996	921546	+	putative ABC transporter periplasmic binding protein
STM0850	921595	922527	+	putative ABC transporter periplasmic binding protein
STM0851	922515	923441	+	putative ABC transporter inner membrane component
STM0852	923532	924857	-	putative Fe-S oxidoreductases family 1
STM0853	925072	925471	+	putative cytoplasmic protein
STM0863	935480	936702	+	D-alanyl-D-alanine carboxypeptidase; penicillin-binding protein 6a
STM0864	936747	937515	-	transcriptional repressor for deoxyribose operon (DeoR family)
STM0865	937577	938194	-	putative permease
STM0866	938490	939730	+	multidrug translocase
STM0868	940596	941820	-	putative transport protein/putative regulator
STM0869	941963	942595	+	putative regulator (TetR/Acr family)
STM0870	942712	944412	-	putative transport protein
STM0871	944656	945045	+	putative inner membrane protein
STM0872	945077	945350	-	redox coenzyme for glutathione-dependent ribonucleotide reductase glutaredoxin1
STM0873	945500	945800	+	putative inner membrane protein
STM0874	945772	946506	+	oxygen-insensitive NADPH nitroreductase
STM0875	946554	947466	+	ribosomal protein S6 modification protein
STM0876	947547	948039	+	putative cytoplasmic protein
STM0877	948375	949500	+	ABC superfamily (peri_perm), putrescine transporter
STM0878	949574	950721	+	putrescine transporter
STM0880	951667	952526	+	putrescine transporter
STM0881	952585	953073	+	putative inner membrane protein
STM0884	954525	955872	+	putative inner membrane protein; homology to SgaT from Vibrio
STM0885	955896	956222	+	putative inner membrane protein; homology to SgaT from Vibrio
STM0886	956226	957719	+	putative sulfatase
STM0887	957938	958683	-	arginine 3rd transport system
STM0889	959574	960305	-	arginine 3rd transport system
STM0890	960297	961028	-	arginine transport system
STM0891	961046	961774	-	arginine transport system
STM0892	962004	962531	-	putative lipoprotein
STM0931	1005673	1006520	+	putative aminidase
STM0932	1006517	1007540	-	putative nucleoside-diphosphate-sugar epimerase
STM0934	1009070	1010083	-	L-allo-threonine aldolase
STM0935	1010110	1011844	-	pyruvate dehydrogenase/oxidase FAD and thiamine PPi cofactors, cytoplasmic in absence of cofactors
STM0937	1012966	1014629	-	hybrid cluster protein
STM0938	1014762	1015677	-	putative inner membrane protein
STM0939	1015855	1017521	+	homology with RecF protein
STM0940	1017518	1018486	-	homolog of virK
STM0941	1018604	1019732	+	putative membrane protein
STM0942	1019716	1021675	+	putative ABC superfamily (atp&memb) transport protein
STM0943	1021805	1022040	-	CspA-like protein but not cold shock induced
STM0944	1022350	1022670	+	putative cytoplasmic protein
STM0945	1022655	1024977	+	ATP-binding subunit of serine protease
STM0950	1027682	1028366	-	homolog of slsA in STM
STM0951	1028379	1029247	-	putative cytoplasmic protein
STM0952	1029343	1030259	+	putative transcriptional regulator, lysR family
STM0955	1030880	1031600	-	leucyl, phenylalanyl-tRNA-protein transferase
STM0956	1031629	1033365	-	cytochrome-related transporter
STM0957	1033351	1035117	-	cytochrome-related transporter
STM0958	1035231	1036210	-	thioredoxin reductase
STM0959	1036670	1037239	+	regulator for lrp regulon and high-affinity branched-chain amino acid transport system
STM0961	1041561	1042183	+	periplasmic protein
STM0962	1042183	1043536	+	putative polynucleotide enzyme
STM0963	1043785	1045087	+	serine tRNA synthetase
STM0964	1045269	1047768	+	anaerobic dimethyl sulfoxide reductase, subunit A
STM0966	1048385	1049261	+	anaerobic dimethyl sulfoxide reductase, subunit C
STM0968	1049598	1050759	+	putative MFS family transport protein
STM0969	1050965	1052398	+	putative APC family, amino-acid transporter
STM0970	1052691	1053515	-	pyruvate formate lyase activating enzyme 1
STM0973	1055099	1057510	-	pyruvate formate lyase I, induced anaerobically
STM0974	1057441	1058474	-	formate transporter
STM0976	1060583	1061292	+	putative inner membrane protein
STM0977	1061470	1062566	+	3-phosphoserine aminotransferase
STM0978	1062637	1063920	+	3-enolpyruvylshikimate-5-phosphate synthetase
STM0979	1064050	1064824	+	putative Zn-dependent protease with chaperone function
STM0980	1064803	1065680	+	cytidine monophosphate (CMP) kinase
STM0981	1065699	1067467	+	30S ribosomal subunit protein S1
STM0983	1068128	1070401	+	putative recombination protein
STM0984	1070426	1072186	+	multicopy repressor of htrB transport protein; ABC superfamily (atp&membrane)
STM0985	1072166	1073160	+	tetraacyldisaccharide 4' kinase
STM0987	1074480	1074670	+	putative inner membrane protein
STM0988	1074651	1075413	+	CTP:CMP-3-deoxy-D-manno-octulosonate transferase
STM0989	1075608	1076517	+	mukF protein (killing factor KicB)
STM0990	1076497	1077288	-	putative KicA protein
STM0991	1077308	1078212	+	S-adenosylmethionine-dependent methyltransferase
STM0992	1078194	1079527	+	mukF protein
STM0993	1079501	1080212	+	putative chromosome partitioning
STM0994	1080201	1084678	+	kinesin-line cell division protein involved in sister chromosome partitioning
STM0996	1087124	1087672	+	putative outer membrane protein
STM0997	1087690	1088347	+	putative metallo-beta-lactamase
STM0998	1088409	1089612	-	aspartate aminotransferase
STM1000	1091482	1092891	-	asparagine tRNA synthetase
STM1004	1096834	1098221	-	nicotinate phosphoribosyltransferase
STM1057	1144119	1146741	+	aminopeptidase N
STM1058	1146875	1147959	+	dihydro-orotate oxidase
STM1059	1148119	1148667	+	putative cytoplasmic protein
STM1060	1148664	1149786	-	putative iron-sulfur protein
STM1061	1149872	1151980	+	putative N6-adenine-specific DNA methylase
STM1062	1151981	1153900	+	putative ATPase component of ABC transporter
STM1063	1153904	1155168	+	paraquat-inducible protein A
STM1064	1155157	1156813	+	paraquat-inducible protein B
STM1066	1157615	1157796	+	ribosome modulation factor (involved in dimerization of 70S ribosomes)
STM1067	1157896	1158479	-	beta-hydroxydecanoyl thioester dehydrase
STM1068	1158483	1160243	-	putative protease
STM1069	1160409	1160881	+	putative cytoplasmic protein
STM1070	1160953	1162133	-	putative membrane component hydrogenase
STM1071	1162362	1163017	-	suppressor of lon
STM1072	1163078	1163693	+	putative DNA transformation protein
STM1073	1163680	1165833	-	putative efflux (PET) family transporter
STM1074	1165852	1166318	-	putative inner membrane protein
STM1075	1166406	1168476	+	DNA helicase IV
STM1076	1168512	1168983	-	methylglyoxal synthase
STM1077	1169065	1169739	-	putative periplasmic protein
STM1078	1169888	1170314	+	putative cytoplasmic protein
STM1079	1170359	1170685	-	putative inner membrane protein
STM1080	1170734	1171958	-	putative SAM-dependent methyltransferase
STM1084	1173840	1174179	-	putative sulfite reductase, gamma subunit
STM1085	1174256	1174915	-	putative TEGT family carrier
STM1092	1180229	1180406	+	Pathogenicity island encoded protein: SPI5
STM1094	1180626	1182100	-	Pathogenicity island encoded protein: SPI5
STM1095	1182268	1183651	-	Copper resistance; histidine kinase
STM1096	1183625	1184377	-	Copper resistance transcriptional regulatory protein
STM1097	1184429	1184851	+	putative periplasmic or exported protein
STM1098	1185184	1185708	-	4-hydroxyphenylacetate catabolism protein
STM1099	1185714	1187283	-	4-hydroxyphenylacetate catabolism protein
STM1100	1187494	1187938	-	4-hydroxyphenylacetate catabolism protein
STM1101	1188201	1189498	+	4-hydroxyphenylacetate catabolism protein
STM1104	1191818	1192204	+	4-hydroxyphenylacetate catabolism protein
STM1105	1192336	1193150	+	4-hydroxyphenylacetate catabolism protein
STM1106	1193154	1193952	+	4-hydroxyphenylacetate catabolism protein
STM1107	1194017	1195400	+	4-hydroxyphenylacetate catabolism protein
STM1108	1195402	1196306	+	4-hydroxyphenylacetate catabolism protein
STM1109	1196316	1197258	+	putative periplasmic protein
STM1110	1197666	1198040	-	putative cytoplasmic protein
STM1111	1198682	1199002	-	putative cytoplasmic protein
STM1112	1198987	1199999	-	curved DNA-binding protein
STM1113	1200137	1200504	+	suppression of copper sensitivity: putative copper binding protein
STM1114	1200547	1202439	+	suppression of copper sensitivity protein
STM1115	1202429	1203059	+	suppression of copper sensitivity protein
STM1117	1203676	1204929	+	glucose-1-phosphatase
STM1118	1204963	1205203	-	putative cytoplasmic protein
STM1119	1205211	1205821	-	trp-repressor binding protein
STM1121	1206186	1206359	+	putative cytoplasmic protein
STM1122	1206483	1207134	+	putative transcriptional repressor (TetR/AcrR family)
STM1124	1207585	1211547	-	plasma membrane proline dehydrogenase
STM1125	1211904	1213477	+	SSS family major sodium/proline symporter
STM1126	1214284	1215158	+	PhoB-dependent ATP-binding pho regulon component
STM1135	1225044	1225993	+	putative oxidoreductase
STM1136	1226065	1226814	+	putative Histidinol phosphatase
STM1137	1226824	1227392	+	putative oxidoreductase component
STM1138	1227445	1227975	+	putative inner membrane protein
STM1139	1228014	1228860	-	putative transcriptional regulator in curly assembly/transport, 2nd curli operon
STM1140	1228874	1229302	-	curli production assembly/transport component, 2nd curli operon
STM1142	1229717	1230380	-	putative transcriptional regulator
STM1143	1231000	1231577	+	minor curlin subunit precursor
STM1144	1231605	1232074	+	curlin major subunit
STM1145	1232127	1232462	+	putative curli production protein
STM1146	1232582	1232913	+	putative periplasmic protein
STM1147	1232988	1233541	+	putative ACR protein
STM1148	1233480	1234964	+	putative phospholipase
STM1150	1236311	1237942	+	periplasmic glucans biosynthesis protein
STM1151	1237935	1240478	+	membrane glycosyltransferase
STM1153	1240780	1241167	-	acidic protein suppresses mutants lacking function of protein export
STM1154	1241236	1242460	-	putative MFS family transport protein
STM1155	1242605	1243535	-	lauroyl/myristoyl acyltransferase involved in lipid A biosynthesis
STM1156	1243730	1244797	+	putative enzyme related to sulfur transferases
STM1157	1244849	1245437	-	putative secreted protein
STM1159	1246256	1246379	-	putative inner membrane protein
STM1160	1246410	1247537	-	putative sarcosine oxidase
STM1161	1247641	1247907	-	putative cytoplasmic protein
STM1162	1248185	1248442	-	DNA damage-inducible protein I
STM1163	1248504	1249628	-	dihydro-orotase
STM1164	1249655	1250225	-	putative outer membrane lipoprotein
STM1165	1250340	1250997	-	glutaredoxin 2
STM1166	1251051	1252267	-	putative MFS superfamily transport protein
STM1167	1252476	1253080	+	acetylation of N-terminal alanine of 30S ribosomal subunit protein S5
STM1168	1253097	1253763	+	putative cytoplasmic protein
STM1169	1253752	1254688	+	putative virulence factor
STM1170	1254942	1256527	+	putative virulence factor
STM1171	1256609	1257031	-	flagellar biosynthesis protein
STM1172	1257036	1257341	-	anti-FliA factor
STM1173	1257421	1258094	-	flagellar biosynthesis protein
STM1174	1258229	1258653	+	flagellar biosynthesis protein
STM1175	1258643	1259061	+	flagellar biosynthesis protein
STM1176	1259061	1259771	+	flagellar biosynthesis protein
STM1178	1261017	1261785	+	flagellar biosynthesis protein
STM1179	1261788	1262581	+	flagellar biosynthesis protein
STM1180	1262630	1263334	+	flagellar biosynthesis protein
STM1181	1263337	1264443	+	putative flagella basal body protein
STM1182	1264429	1265393	+	flagellar biosynthesis protein
STM1183	1265447	1267119	+	hook-filament junction protein 1
STM1184	1267119	1268087	+	hook-filament junction protein
STM1185	1268344	1271547	-	RNase E
STM1190	1275222	1275784	+	putative metal-binding protein
STM1192	1276126	1277222	+	putative fatty acid/phospholipid synthesis protein
STM1193	1277302	1278255	+	3-oxoacyl-[acyl-carrier-protein synthase III; acetylCoA ACP transacylase
STM1194	1278259	1279200	+	malonyl-CoA-[acyl-carrier-protein transacylase
STM1195	1279203	1279947	+	3-oxoacyl-[acyl-carrier-protein reductase
STM1197	1280412	1281666	+	3-oxoacyl-[acyl-carrier-protein synthase II
STM1198	1281779	1282599	+	4-amino-4-deoxychorismate lyase
STM1199	1282602	1283624	+	putative periplasmic solute-binding protein
STM1200	1283604	1284255	+	thymidylate kinase
STM1201	1284238	1285256	+	DNA polymerase III, delta prime subunit
STM1202	1285257	1286064	+	putative metal-dependent hydrolase
STM1203	1286342	1287792	+	glucose-specific IIBC component of the Sugar Specific PTS family
STM1204	1287877	1290063	-	outer membrane receptor for Fe(III)-coprogen
STM1205	1290381	1290752	+	putative protein kinase C inhibitor
STM1206	1290742	1291129	+	putative outer membrane lipoprotein
STM1207	1291128	1291781	+	putative outer membrane lipoprotein
STM1208	1291753	1292586	+	putative cytoplasmic protein
STM1209	1292585	1293622	+	putative glycosyl hydrolase
STM1210	1293636	1294189	+	putative esterase
STM1211	1294327	1295748	+	respiratory NADH dehydrogenase 2
STM1212	1295913	1296466	+	putative outer membrane lipoprotein
STM1215	1297772	1298751	-	putative periplasmic protein
STM1216	1298885	1302349	-	transcription-repair coupling factor
STM1217	1302558	1303868	+	integral membrane protein ABC transporter
STM1218	1303848	1304562	+	ATP-binding protein ABC transporter
STM1219	1304548	1305806	+	integral membrane protein ABC transporter
STM1220	1305824	1306746	+	putative regulator (NagC/XylR family)
STM1221	1306756	1307586	+	putative nicotinate-nucleotide dimethylbenzimidazolephosphoribosltransferase
STM1222	1307668	1308727	-	spermidine/putrescine transporter
STM1223	1308739	1309532	-	spermidine/putrescine transporter
STM1225	1311173	1312052	-	spermidine/putrescine transporter
STM1226	1312020	1313156	-	spermidine/putrescine transporter
STM1227	1313395	1314636	+	putative peptidase T
STM1229	1316014	1317148	-	putative cytoplasmic protein
STM1230	1317216	1318679	-	sensory kinase protein in two-component regulatory system with PhoP
STM1231	1318679	1319365	-	response regulator in two-component regulatory system with PhoQ
STM1233	1320851	1321550	-	unknown membrane associated protein
STM1234	1321579	1322739	-	tRNA (5-methylaminomethyl-2-thiouridylate)-methyltransferase
STM1237	1323538	1324203	-	putative ribosomal large subunit pseudouridine synthase
STM1238	1324219	1325625	+	isocitrate dehydrogenase in e14 prophage
STM1241	1329456	1329702	-	macrophage survival gene; reduced mouse virulence
STM1243	1330822	1331045	-	homology with cold shock proteins
STM1246	1332234	1332798	+	reduced macrophage survival protein
STM1249	1334035	1334385	-	putative periplasmic protein
STM1251	1335498	1335973	+	putative molecular chaperone (small heat shock protein)
STM1252	1336306	1337355	+	putative cytoplasmic protein
STM1253	1337438	1337981	-	putative inner membrane protein
STM1254	1338117	1338436	-	putative outer membrane lipoprotein
STM1256	1340741	1341721	+	putative ABC transporter
STM1257	1341704	1342523	+	putative ABC transporter
STM1260	1343980	1345119	-	putative inner membrane protein
STM1261	1345300	1345633	+	putative cytoplasmic protein
STM1263	1345815	1346477	+	putative periplasmic protein
STM1265	1347512	1348112	+	putative response regulators
STM1266	1348176	1349029	+	putative transcriptional regulator
STM1267	1349284	1349542	-	putative cytoplasmic protein
STM1270	1350570	1351223	+	putative transport protein
STM1271	1351385	1351758	+	putative cytoplasmic protein
STM1272	1351745	1351943	+	putative cytoplasmic protein
STM1274	1353120	1353377	+	putative inner membrane protein
STM1275	1353799	1354061	+	putative hemolysin
STM1278	1354893	1356094	-	putative MFS family transport protein (amino acid/amine transport)
STM1279	1356166	1356972	+	putative regulator (AraC/XylS family)
STM1280	1356952	1357398	-	putative inner membrane protein
STM1282	1357708	1358240	-	putative cytoplasmic protein
STM1283	1358276	1359786	-	putative methyl-accepting chemotaxis protein
STM1284	1360410	1361707	-	putative cytoplasmic protein
STM1285	1361819	1363767	-	putative Ser protein kinase
STM1286	1364165	1364926	+	scaffolding protein for murein-synthesizing holoenzyme
STM1287	1365216	1366412	+	arylsulfatase regulator
STM1288	1366503	1367366	+	putative aldehyde reductase
STM1289	1367465	1368361	-	putative enzyme related to aldose 1-epimerase
STM1290	1368684	1369691	-	glyceraldehyde-3-phosphate dehydrogenase A
STM1291	1369983	1370434	+	hypothetical protein
STM1292	1370460	1370754	+	putative cytoplasmic protein
STM1293	1371106	1371774	-	nicotinamidase/ pyrazinamidase
STM1294	1371789	1372822	-	cytoplasmic L-asparaginase I
STM1295	1372901	1374769	-	protease IV
STM1297	1375588	1376643	+	selenophosphate synthase
STM1298	1376648	1378597	+	DNA topoisomerase III
STM1299	1378627	1379985	-	NADP-specific glutamate dehydrogenase
STM1302	1380933	1381751	-	exonuclease III
STM1304	1383392	1384436	+	arginine succinyltransferase
STM1305	1384419	1385911	+	succinylglutamic semialdehyde dehydrogenase
STM1306	1385900	1387251	+	succinylarginine dihydrolase
STM1308	1388532	1389033	+	periplasmic protein related to spheroblast formation
STM1310	1390110	1390948	-	NAD synthetase
STM1312	1391785	1392118	+	PTS family sugar specific enzyme IIB for cellobiose, arbutin, and salicin
STM1313	1392187	1393559	+	PTS family sugar specific enzyme II for cellobiose, arbutin, and salicin
STM1314	1393599	1393957	+	PTS family sugar specific enzyme III for cellobiose, arbutin, and salicin
STM1315	1393958	1394810	+	transcriptional repressor of cel operon
STM1316	1394923	1396290	+	phospho-beta-glucosidase
STM1317	1396293	1397061	+	putative glucosidase
STM1318	1397105	1399372	-	catalase
STM1320	1400066	1401470	-	kinase-like protein
STM1321	1401594	1402193	-	LexA regulated gene
STM1323	1403137	1403684	+	putative regulator
STM1324	1403727	1404602	-	putative cytoplasmic protein
STM1325	1404694	1404994	-	putative cytoplasmic protein
STM1326	1405081	1406025	-	6-phosphofructokinase II
STM1327	1406287	1407060	+	putative salt-induced outer membrane protein
STM1328	1407109	1408075	-	putative outer membrane protein
STM1333	1412182	1414121	+	threonine tRNA synthetase
STM1334	1414213	1414667	+	protein chain initiation factor IF-3
STM1335	1414748	1414960	+	50S ribosomal subunit protein L35
STM1337	1415659	1416652	+	phenylalanine tRNA synthetase, alpha-subunit
STM1338	1416656	1419055	+	phenylalanine tRNA synthetase, beta-subunit
STM1340	1419553	1420542	+	vitamin B12 transport protein
STM1341	1420622	1421185	+	vitamin B12 transport protein
STM1343	1421996	1422475	+	lipoprotein
STM1344	1422781	1423502	+	putative diguanylate cyclase/phosphodiesterase domain 1
STM1345	1423553	1425006	+	putative cytoplasmic protein
STM1347	1425389	1426471	-	3-deoxy-D-arabinoheptulosonate-7-phosphate synthase
STM1348	1426591	1427437	-	putative inner membrane protein
STM1349	1427610	1430139	+	phosphoenolpyruvate synthase
STM1350	1430181	1431833	-	plant pathogenicity factor-like protein
STM1351	1431911	1432220	-	putative ferredoxin
STM1352	1432201	1433501	-	flavoprotein
STM1353	1433544	1434495	-	putative electron transfer flavoprotein
STM1354	1434501	1435276	-	putative electron transfer flavoprotein
STM1355	1435719	1436618	+	putative transcription regulator, AraC family
STM1356	1436694	1437858	-	putative acyl-CoA dehydrogenase
STM1357	1437859	1439412	-	putative acetyl-CoA:acetoacetyl-CoA transferase beta subunit
STM1358	1439608	1440377	-	3-dehydroquinate dehydratase
STM1359	1440411	1441289	-	putative shikimate 5-dehydrogenase
STM1360	1441344	1442595	-	putative MFS family transport protein
STM1364	1445112	1446246	-	putative permease
STM1365	1446477	1449551	+	putative oxidase
STM1366	1449534	1449958	+	putative protein PaaI
STM1367	1450009	1450245	+	putative cytoplasmic protein
STM1368	1450533	1451885	-	putative Na+-dicarboxylate symporter
STM1369	1452295	1452674	+	putative HesB-like domain protein
STM1370	1452672	1454170	+	putative ABC transporter
STM1371	1454176	1454933	+	putative transport protein
STM1372	1454895	1456179	+	iron-sulfur component of FhuF stability protein
STM1373	1456163	1457396	+	selenocysteine lyase
STM1378	1459917	1461452	-	pyruvate kinase I
STM1379	1461731	1463080	-	putative amino acid permease
STM1380	1463096	1463992	-	putative hydrolase or acyltransferase
STM1382	1464797	1466030	-	putative regulatory protein, deoR family
STM1383	1466346	1469416	-	tetrathionate reductase complex, subunit A
STM1384	1469401	1470431	-	tetrathionate reductase complex, subunit C
STM1385	1470424	1471176	-	tetrathionate reductase complex, subunit B
STM1386	1471334	1473118	+	tetrathionate reductase complex: sensory transduction histidine kinase
STM1387	1473088	1473713	+	tetrathionate reductase complex: response regulator
STM1389	1474119	1475089	-	putative inner membrane protein
STM1391	1476158	1476801	-	secretion system regulator: transcriptional activator
STM1392	1476827	1479596	-	secretion system regulator: Sensor component
STM1393	1479990	1480391	+	secretion system apparatus protein
STM1394	1480387	1481886	+	secretion system apparatus protein
STM1395	1481867	1483078	+	secretion system apparatus protein
STM1396	1483080	1483328	+	secretion system effector
STM1397	1483585	1483918	+	secretion system effector
STM1402	1487042	1487464	+	secretion system effector
STM1403	1487516	1487950	+	secretion system chaparone
STM1406	1489521	1489743	+	secretion system apparatus
STM1410	1491035	1491583	+	putative cytoplasmic protein
STM1411	1491574	1492254	+	secretion system apparatus protein
STM1412	1492216	1493236	+	secretion system apparatus protein
STM1414	1493640	1495692	+	secretion system apparatus protein
STM1415	1495674	1496983	+	secretion system apparatus protein
STM1416	1496986	1497363	+	secretion system apparatus protein
STM1417	1497339	1497718	+	secretion system apparatus protein
STM1419	1498732	1499382	+	secretion system apparatus protein
STM1420	1499375	1499645	+	secretion system apparatus
STM1425	1501953	1503337	-	putative MATE family transport protein
STM1426	1503529	1504184	+	riboflavin synthase, alpha chain
STM1427	1504226	1505385	-	cyclopropane fatty acyl phospholipid synthase
STM1429	1506972	1507914	+	putative LysR family transcriptional regulator
STM1430	1507911	1509032	-	transcriptional repressor for pur regulon, glyA, glnB, prsA, speA (GalR/LacI family)
STM1431	1509404	1509998	-	iron superoxide dismutase
STM1432	1510112	1510966	-	putative cell wall-associated hydrolase
STM1433	1511254	1511615	+	putative glutaredoxin protein
STM1434	1511693	1512340	-	RNase T
STM1435	1512441	1512861	-	glyoxalase I
STM1437	1514073	1514672	-	putative TetR/AcrR family transcriptional repressor
STM1438	1514764	1515014	+	putative oxidoreductase
STM1439	1515053	1515961	+	putative aldo/keto reductase
STM1440	1516033	1516562	+	copper/zinc superoxide dismutase
STM1442	1518577	1519473	-	putative multidrug resistance efflux pump
STM1444	1519865	1520311	+	MarR family transcriptional regulator for hemolysin
STM1445	1520359	1520840	-	putative outer membrane lipoprotein
STM1447	1522289	1522636	+	putative outer membrane lipoprotein
STM1449	1523466	1524752	+	tyrosine tRNA synthetase
STM1450	1524801	1525672	+	pyridoxal kinase 2
STM1451	1525731	1526348	-	glutathionine S-transferase
STM1452	1526441	1527955	-	putative POT family peptide transport protein
STM1453	1528548	1529196	-	endonuclease III
STM1454	1529183	1529888	-	putative membrane NADH-quinone reductase protein
STM1458	1533761	1534358	-	putative alternative beta subunit of Na+-transporting NADH:ubiquinone oxidoreductase
STM1459	1534339	1534931	-	putative inner membrane oxidoreductase protein
STM1460	1534997	1535448	-	putative inner membrane protein
STM1461	1535526	1535756	-	putative cytoplasmic protein
STM1462	1536297	1537412	+	putative oxidoreductase
STM1466	1539192	1540713	-	putative periplasmic protein
STM1467	1540803	1541990	-	mannose-6-phosphate isomerase
STM1468	1542178	1543824	+	fumarase A
STM1469	1543884	1545395	+	fumarase C
STM1470	1545392	1546321	-	replication termination protein
STM1471	1546397	1547711	-	sensory histidine kinase in two-component regulatory system with RstA
STM1475	1551281	1552012	-	response regulator in two-component regulatory system with RstB (OmpR family)
STM1476	1552133	1552474	+	putative inner membrane protein
STM1478	1554217	1555174	-	putative periplasmic protein
STM1479	1555562	1557217	+	pyridine nucleotide transhydrogenase, alpha subunit
STM1480	1557216	1558616	+	pyridine nucleotide transhydrogenase, beta subunit
STM1482	1560230	1560605	+	putative membrane transporter of cations and cationic drugs
STM1484	1560961	1561782	-	putative protease
STM1486	1562694	1563958	-	putative MFS familty transport protein
STM1487	1564067	1564966	+	putative LysR family transcriptional regulator
STM1488	1565081	1566314	+	transcriptional repressor of ptsG and ptsHI
STM1489	1566428	1567135	+	putative dethiobiotin synthase
STM1490	1567091	1568380	-	putative chloride channel protein
STM1491	1568516	1569670	-	ABC-type proline/glycine betaine transport system
STM1492	1569664	1570318	-	putative binding-protein-dependent transport system
STM1493	1570321	1571230	-	putative periplasmic component
STM1494	1571252	1571968	-	ABC-type transport system protein
STM1496	1572924	1573794	-	putative dimethylsulfoxide reductase
STM1498	1574411	1576846	-	putative dimethyl sulfoxide reductase
STM1499	1576945	1579395	-	putative dimethyl sulfoxide reductase, chain A1
STM1500	1579540	1579857	-	putative outer membrane protein
STM1501	1579943	1580662	+	putative inner membrane lipoprotein
STM1502	1580703	1581274	-	spermidine N1-acetyltransferase
STM1503	1581299	1581652	-	putative periplasmic protein
STM1504	1581793	1582119	+	putative inner membrane lipoprotein
STM1505	1582230	1583455	+	putative dehydratase
STM1506	1583454	1584485	+	putative dehydrogenase
STM1507	1584539	1585516	+	putative transport protein
STM1508	1586051	1587528	+	putative mannitol dehydrogenase
STM1510	1587979	1588673	-	putative gntR family regulatory protein
STM1511	1588795	1589554	-	putative oxidoreductase
STM1512	1589668	1591722	+	dipeptidyl carboxypeptidase II
STM1514	1592369	1592911	-	putative competence-damaged protein
STM1515	1593312	1593715	+	putative periplasmic protein
STM1516	1594407	1595602	-	putative MFS family transport protein
STM1517	1595813	1596724	+	putative permease, integral membrane protein
STM1518	1596843	1597070	-	multiple antibiotic resistance protein
STM1519	1597087	1597540	-	AraC/XylS family transcriptional activator of defense systems
STM1520	1597490	1598122	-	transcriptional repressor of marRAB operon
STM1521	1598164	1598848	+	putative MarC Transporter
STM1522	1598895	1600085	-	MFS family L-arabinose/isopropyl-beta-D-thiogalactopyranoside export protein
STM1523	1600201	1601082	-	putative LysR family transcriptional regulator
STM1524	1601166	1602564	+	putative succinate-semialdehyde dehydrogenase
STM1525	1602625	1603563	+	putative glutaminase
STM1526	1603544	1603922	+	putative cytoplasmic protein
STM1528	1605149	1605691	-	putative outer membrane protein
STM1530	1606403	1607526	+	putative outer membrane protein
STM1531	1607667	1608015	-	putative hydrogenase
STM1534	1609975	1610392	-	putative hydrogenase
STM1535	1610382	1610685	-	putative hydrogenase protein
STM1536	1610681	1611296	-	putative hydrogenase maturation protease
STM1537	1611295	1612042	-	putative Ni/Fe-hydrogenase 1 b-type cytochrome subunit
STM1538	1611989	1613797	-	putative hydrogenase-1 large subunit
STM1539	1613794	1614902	-	putative hydrogenase-1 small subunit
STM1541	1616457	1617254	+	putative gntR family regulatory protein
STM1543	1618313	1619606	-	putative transport protein
STM1555	1632123	1633130	+	putative transcriptional regulator
STM1556	1633267	1634725	+	putative Na+/H+ antiporter
STM1557	1634727	1635940	+	putative aminotransferase
STM1558	1636053	1638135	-	putative glycosyl hydrolase
STM1559	1638185	1640719	-	putative glycosyl hydrolase
STM1560	1640710	1642500	-	putative alpha amylase
STM1561	1642623	1643414	-	putative outer membrane or secreted lipoprotein
STM1562	1643551	1643894	-	putative periplasmic transport protein
STM1563	1644230	1644674	-	putative resistance protein
STM1564	1645161	1645389	+	putative cytoplasmic protein
STM1565	1645473	1645627	+	30S ribosomal subunit protein S22
STM1566	1645804	1647501	+	NAD-linked malate dehydrogenase
STM1567	1647775	1648797	+	alcohol dehydrogenase
STM1568	1648888	1649557	-	formate dehydrogenase-N, cytochrome B556(Fdn) gamma subunit
STM1569	1649537	1650432	-	formate dehydrogenase-N, Fe-S beta subunit
STM1570	1650435	1653489	-	putative molybdopterin oxidoreductases [transl_except=(pos:586..588,aa:Sec)
STM1573	1656398	1656778	+	putative cytoplasmic protein
STM1574	1656803	1658295	-	methyl viologen resistance protein
STM1576	1659191	1660589	+	MFS superfamily nitrate extrusion protein
STM1577	1660668	1664421	+	nitrate reductase 2, alpha subunit
STM1580	1666644	1667334	+	nitrate reductase 2, gamma subunit
STM1581	1667427	1668333	+	putative phenazine biosynthesis protein
STM1582	1668369	1669227	-	putative arylamine N-acetyltransferase
STM1584	1670632	1672136	+	APC family, L-asparagine transport protein
STM1585	1672213	1672441	-	putative outer membrane lipoprotein
STM1586	1672579	1673652	-	putative periplasmic protein
STM1587	1673893	1676024	+	putative outer membrane receptor
STM1588	1676091	1676773	-	putative gntR family regulatory protein
STM1589	1677090	1678160	-	putative NADP-dependent oxidoreductase
STM1590	1678327	1678854	+	putative acyltransferase
STM1591	1678840	1679303	+	putative inner membrane protein
STM1592	1679308	1679552	-	putative cytoplasmic protein
STM1594	1681083	1684070	+	ssrAB activated gene
STM1595	1684062	1686211	+	ssrAB activated gene
STM1597	1686828	1688287	-	putative aldehyde dehydrogenase
STM1598	1688388	1689812	-	putative gntR family regulatory protein
STM1603	1693388	1693629	+	putative periplasmic protein
STM1604	1693630	1695612	-	putative collagenase
STM1606	1696291	1697478	+	putative benzoate membrane transport protein
STM1609	1698939	1699952	-	K+-tellurite ethidium and proflavin transport protein
STM1613	1702901	1703188	+	putative PTS system, enzymeIIB component
STM1614	1703188	1704512	+	putative PTS system enzyme IIC component
STM1615	1704511	1705332	+	putative nucleoside triphosphatase
STM1618	1706545	1707352	+	putative DeoR family transcriptional repressor of sgc operon
STM1622	1709821	1711494	-	putative periplasmic glucans biosynthesis protein
STM1623	1711696	1713211	-	putative carboxylesterase
STM1624	1713253	1714612	-	putative cytoplasmic protein
STM1625	1714889	1715812	+	putative LysR family transcriptional regulator
STM1626	1715873	1717504	-	methyl-accepting chemotaxis protein III
STM1627	1717667	1718798	-	alcohol dehydrogenase class III
STM1636	1726047	1726733	+	putative ABC-type transport system probable membrane spanning protein
STM1638	1729109	1729546	+	putative SAM-dependent methyltransferase
STM1639	1729817	1730358	-	cytochrome b(561)
STM1641	1731328	1735230	-	ATP-dependent helicase
STM1642	1735419	1736036	+	acyl carrier protein phosphodiesterase
STM1644	1736625	1736957	-	putative periplasmic protein
STM1645	1736956	1737158	-	putative outer membrane lipoprotein
STM1646	1737147	1739800	-	putative periplasmic protein
STM1647	1740009	1741012	+	NAD-dependent fermentative D-lactate dehydrogenase
STM1650	1741754	1742058	+	putative reverse transcriptase
STM1652	1746114	1746559	+	putative universal stress protein
STM1654	1747290	1748238	+	putative ATPase
STM1656	1750142	1751136	-	putative Zn transport protein
STM1657	1751271	1752430	-	putative methyl-accepting chemotaxis protein
STM1658	1752836	1753413	-	putative Smr domain protein
STM1660	1754273	1755120	+	transcriptional regulator
STM1661	1755258	1756218	+	putative universal stress protein
STM1662	1756273	1756539	-	putative inner membrane protein
STM1663	1756748	1757797	+	putative integral membrane protein
STM1664	1757883	1758485	-	putative transcriptional regulator
STM1671	1764383	1765247	+	putative bacterial regulatory helix-turn-helix protein, araC family
STM1678	1770959	1771894	+	putative 2'-hydroxyisoflavone reductase
STM1679	1771991	1773615	-	periplasmic murein tripeptide transport protein
STM1681	1774497	1775473	-	putative chloromuconate cycloisomerase
STM1683	1776174	1777837	-	transcriptional regulator of aromatic amino acid biosynthesis genes (aroF, aroG, tyrA) and aromatic amino acid transport
STM1686	1780467	1780793	-	phage shock protein
STM1687	1780857	1781084	-	phage shock protein
STM1688	1781098	1781472	-	phage shock protein
STM1689	1781457	1781692	-	phage shock protein
STM1690	1781741	1782421	-	phage shock protein
STM1692	1783672	1785321	+	ABC superfamily peptide transport protein
STM1693	1785304	1786283	+	ABC superfamily peptide transport protein
STM1694	1786260	1787160	+	ABC superfamily peptide transport protein
STM1695	1787152	1788152	+	ABC superfamily peptide transport protein
STM1696	1788138	1788960	+	ABC superfamily peptide transport protein
STM1700	1792117	1792918	+	enoyl-[acyl-carrier-protein reductase (NADH)
STM1702	1794158	1796274	+	RNase II
STM1703	1796527	1798518	+	putative PAS/PAC domain protein
STM1704	1798906	1799658	+	putative deoR family regulatory protein
STM1705	1799843	1800135	+	osmotically inducible lipoprotein
STM1706	1800255	1800589	-	putative translation initiation factor SUI1
STM1708	1801509	1802693	-	putative N-acetylglucosaminyl transferase
STM1709	1802685	1803005	-	putative inner membrane protein
STM1710	1803143	1803918	-	phosphatidylglycerophosphate phosphatase B
STM1711	1804091	1804693	+	GTP cyclohydrolase II
STM1712	1804749	1807432	-	aconitate hydratase 1
STM1714	1809786	1812392	-	DNA topoisomerase type I, omega protein
STM1715	1812774	1813037	+	putative cytoplasmic protein
STM1716	1813079	1814137	-	putative peptidase
STM1717	1814352	1815124	+	putative oxoacyl-(acyl carrier protein) reductase
STM1718	1815108	1815711	+	cob(I)alamin and cobinamide adenolsyltransferase
STM1719	1815798	1816684	-	putative ribosomal large subunit pseudouridine synthase
STM1720	1816774	1817403	-	putative translation factor
STM1721	1817402	1818283	-	trpR controlled transcriptional unit in the 5' upstream region of the trp operon
STM1722	1818341	1818449	+	trp operon leader peptide
STM1724	1820092	1821701	+	anthranilate synthase, component II
STM1725	1821643	1823063	+	N-(5-phosphoribosyl)anthranilate isomerase
STM1726	1823062	1824266	+	tryptophan synthase, beta protein
STM1728	1825539	1825734	+	putative cytoplasmic protein
STM1730	1826389	1826907	+	putative cytoplasmic protein
STM1731	1826919	1827805	+	putative catalase
STM1732	1827887	1828536	-	outer membrane protein W
STM1733	1828853	1829267	+	putative ferredoxin
STM1734	1829282	1830036	+	putative inner membrane protein
STM1735	1830080	1830632	+	putative intracellular septation protein
STM1736	1830793	1831194	+	putative Acyl-CoA hydrolase
STM1738	1832192	1832502	+	putative cytoplasmic protein
STM1739	1832846	1834322	+	cardiolipin synthase
STM1740	1834344	1834685	+	putative cytoplasmic protein
STM1741	1834733	1835575	-	putative voltage-gated potassium channel
STM1742	1835617	1836632	-	oligopeptide transport protein
STM1743	1836618	1837638	-	oligopeptide transport protein
STM1744	1837637	1838557	-	oligopeptide transport protein
STM1745	1838560	1839492	-	oligopeptide transport protein
STM1746	1839602	1841396	-	oligopeptide transport protein with chaperone properties
STM1748	1841998	1842657	-	putative MarC family integral membrane protein
STM1749	1843110	1845800	+	iron-dependent alcohol dehydrogenase of the multifunctional alcohol dehydrogenase AdhE
STM1750	1845997	1846634	-	thymidine kinase
STM1751	1847151	1847690	+	DNA-binding protein HLP-II
STM1752	1847822	1848744	-	glucose-1-phosphate uridylyltransferase
STM1753	1848933	1849959	-	Response regulator in protein turnover
STM1754	1850037	1850942	-	putative phosphoesterase
STM1755	1851040	1851511	+	putative cytoplasmic protein
STM1756	1851546	1852404	+	formyltetrahydrofolate hydrolase
STM1764	1858407	1862248	-	nitrate reductase 1, alpha subunit
STM1765	1862538	1864130	-	MFS superfamily nitrite extrusion protein
STM1766	1864160	1866072	+	sensory histidine kinase in two component regulatory system with NarL
STM1767	1866052	1866715	+	response regulator in two-component regulatory system with NarX (or NarQ)
STM1768	1866716	1868153	-	putative invasin
STM1769	1868300	1868670	+	putative ACR protein
STM1770	1868750	1868989	-	cation transport regulator
STM1771	1869234	1870347	+	CaCA family, sodium-calcium/proton antiporter
STM1772	1870401	1871266	-	3-deoxy-D-manno-octulosonic acid 8-P synthetase
STM1773	1871293	1872114	-	putative transcriptional regulator
STM1774	1872106	1872562	-	regulator of invasion genes
STM1775	1872492	1873333	-	putative protoporphyrinogen oxidase
STM1776	1873325	1874425	-	peptide chain release factor RF-1
STM1777	1874448	1875724	-	glutamyl tRNA reductase
STM1778	1876001	1876641	+	outer membrane lipoprotein
STM1780	1877687	1878702	+	phosphoribosylpyrophosphate synthetase
STM1781	1878851	1880512	+	putative SulP family transport protein
STM1782	1880557	1880845	-	putative inner membrane protein
STM1783	1881087	1881695	+	peptidyl-tRNA hydrolase
STM1784	1881797	1882903	+	putative GTP-binding protein
STM1786	1884759	1885940	+	hydrogenase-1 small subunit
STM1787	1885923	1887730	+	hydrogenase-1 large subunit
STM1788	1887736	1888480	+	putative Ni/Fe-hydrogenase 1 b-type cytochrome subunit
STM1791	1889450	1890312	+	putative hydrogenase-1 protein
STM1792	1890376	1891931	+	putative cytochrome oxidase, subunit I
STM1793	1891931	1893079	+	putative cytochrome oxidase, subunit II
STM1795	1893520	1894850	+	putative homolog of glutamic dehydrogenase
STM1796	1894974	1896776	+	trehalase, periplasmic
STM1797	1896839	1897112	-	putative transglycosylase-associated protein
STM1798	1897247	1897996	+	putative inner membrane protein
STM1799	1898010	1898634	-	membrane-bound lytic murein transglycosylase E
STM1801	1899787	1901536	+	putative CPA1 family Na:H transport protein
STM1802	1901599	1902680	-	alanine racemase 2
STM1803	1902683	1904086	-	D-amino acid dehydrogenase subunit
STM1804	1904292	1905836	+	putative cytoplasmic protein
STM1805	1905883	1906616	-	negative regulator of fad regulon
STM1806	1906809	1908366	+	NhaB family of transport protein
STM1807	1908495	1909038	+	putative disulfide oxidoreductase
STM1808	1909141	1909488	+	putative cytoplasmic protein
STM1809	1909560	1909746	-	putative cytoplasmic protein
STM1810	1909925	1910067	-	putative cytoplasmic protein
STM1811	1910414	1910894	-	putative cytoplasmic protein
STM1812	1910953	1911623	-	putative fumarylacetoacetate (FAA) hydrolase family protein
STM1813	1911662	1911994	-	putative cytoplasmic protein
STM1814	1912072	1912788	+	cell division inhibitor
STM1815	1912801	1913624	+	cell division inhibitor
STM1816	1913617	1913894	+	cell division topological specificity factor
STM1818	1915216	1916912	-	acyl-CoA synthetase
STM1820	1917759	1918465	-	putative molecular chaperone
STM1821	1918512	1920433	-	putative DNA helicase
STM1823	1920903	1921094	-	putative cytoplasmic protein
STM1824	1921151	1922527	+	p-aminobenzoate synthetase, component I
STM1825	1922516	1923109	+	putative NTP pyrophosphohydrolase
STM1826	1923360	1924737	+	L-serine deaminase I/L-threonine deaminase I
STM1827	1924773	1926476	+	putative diguanylate cyclase/phosphodiesterase
STM1828	1926498	1928069	-	putative inner membrane protein
STM1829	1928045	1928380	-	putative cytoplasmic protein
STM1830	1928333	1929498	+	mannose-specific enzyme IIAB
STM1831	1929538	1930351	+	mannose-specific enzyme IIC
STM1832	1930343	1931215	+	mannose-specific enzyme IID
STM1833	1931262	1931743	+	putative inner membrane protein
STM1834	1932075	1932707	+	putative YebN family transport protein
STM1835	1932704	1933524	-	23S rRNA m1G745 methyltransferase
STM1836	1933579	1935331	-	putative penicillin-binding protein-3
STM1838	1935766	1935926	-	putative cytoplasmic protein
STM1841	1937211	1937456	+	putative outer membrane or exported
STM1842	1937668	1938469	-	putative IclR family transcriptional repressor
STM1843	1938635	1940008	+	putative transport protein
STM1844	1940056	1940954	-	heat shock protein
STM1845	1941131	1943197	-	carboxy-terminal protease for penicillin-binding protein 3
STM1846	1943199	1943896	-	activator of proP
STM1847	1943983	1944567	-	putative GAF domain-containing protein
STM1848	1944601	1945892	+	putative inner membrane protein
STM1849	1945855	1948494	+	putative inner membrane protein
STM1850	1948558	1950011	+	putative rRNA methyltransferase
STM1851	1950114	1950365	+	putative cytoplasmic protein
STM1852	1950467	1950667	+	putative inner membrane lipoprotein
STM1875	1969539	1969927	-	similar Cu resistance protein CopC
STM1876	1970039	1970281	+	DNA polymerase III, theta subunit
STM1877	1970377	1971045	+	putative amidohydrolase
STM1878	1971057	1971767	+	DNA exonuclease X
STM1879	1971802	1973866	-	protease II
STM1880	1974066	1974735	-	putative inner membrane protein
STM1881	1974819	1975184	-	putative periplasmic protein
STM1882	1975240	1975543	-	DNA damage-inducible gene in SOS regulon, dependent on cyclic AMP and H-NS
STM1883	1975647	1976839	+	phosphoribosylglycinamide formyltransferase 2
STM1884	1976939	1977754	-	2-keto-3-deoxygluconate 6-phosphate aldolase
STM1885	1977618	1979494	-	6-phosphogluconate dehydratase
STM1886	1979664	1981336	-	glucose-6-phosphate dehydrogenase
STM1887	1981481	1982350	+	putative transcriptional regulator
STM1888	1982462	1983916	+	pyruvate kinase II
STM1889	1983989	1984970	-	myristoyl transferase in lipid A biosynthesis
STM1890	1985077	1986410	-	putative peptidase
STM1891	1986412	1987426	-	ABC superfamily high affinity Zn transport protein
STM1892	1987384	1988190	+	ABC superfamily high affinity Zn transport protein
STM1893	1988169	1988972	+	ABC superfamily high affinity Zn transport protein
STM1899	1993783	1994535	-	putative cytoplasmic protein
STM1900	1994553	1995013	-	dATP pyrophosphohydrolase
STM1901	1995108	1996892	-	aspartate tRNA synthetase
STM1904	1998627	1999034	+	putative inner membrane protein
STM1905	1999060	1999818	+	putative SAM-dependent methyltransferase
STM1908	2001788	2002374	-	putative cytoplasmic protein
STM1909	2002583	2004327	+	arginine tRNA synthetase
STM1910	2004509	2006387	+	putative penicillin-binding protein
STM1911	2006441	2007586	-	putative cytoplasmic protein
STM1913	2008209	2010300	-	flagellar biosynthesis protein
STM1914	2010280	2011444	-	putative part of export apparatus for flagellar proteins
STM1916	2012280	2012684	-	chemotaxis regulator protein
STM1917	2012687	2013747	-	methyl esterase
STM1918	2013733	2014607	-	glutamate methyltransferase
STM1919	2014753	2016428	-	methyl accepting chemotaxis protein II
STM1920	2016651	2017165	-	purine-binding chemotaxis protein
STM1921	2017175	2019201	-	sensory histitine protein kinase
STM1922	2019195	2020132	-	enables flagellar motor rotation
STM1923	2020121	2021020	-	proton conductor component of motor
STM1924	2021133	2021723	-	regulator of flagellar biosynthesis
STM1925	2021714	2022215	-	regulator of flagellar biosynthesis
STM1927	2022839	2023279	+	putative universal stress protein
STM1928	2023297	2024874	-	trehalose-6-phosphate synthase
STM1929	2024693	2025552	-	trehalose-6-phosphate phophatase, biosynthetic
STM1931	2026129	2026693	-	putative intracellular protease/amidase
STM1932	2027217	2027740	+	ferritin-like protein
STM1933	2027919	2028565	-	putative ribose 5-phosphate isomerase
STM1934	2028800	2029148	+	putative outer membrane lipoprotein
STM1935	2029375	2029885	+	cytoplasmic ferritin
STM1937	2030271	2031608	+	HAAAP family tyrosine-specific transport protein
STM1938	2031683	2032361	-	putative metal-binding protein
STM1939	2032586	2032919	-	putative glucose-6-phosphate dehydrogenase
STM1940	2033125	2034570	-	putative cell wall-associated hydrolase
STM1945	2035810	2036377	-	phosphatidylglycerophosphate synthetase
STM1947	2038244	2038914	-	putative LuxR/UhpA family response regulator
STM1949	2039353	2039588	+	putative cytoplasmic protein
STM1950	2039655	2040395	-	transcriptional regulator of ftsQAZ gene cluster
STM1952	2041358	2042042	-	putative ABC-type amino acid transporter
STM1953	2042047	2043044	-	putative 1-cyclopropane-carboxylate deaminase
STM1955	2044134	2044696	-	putative regulator of FliA
STM1956	2044744	2045477	-	sigma F (sigma 28) factor of RNA polymerase
STM1961	2050808	2051224	+	repressor of class 3a and 3b operons (RflA activity)
STM1962	2051210	2051592	+	putative export chaperone for FliD
STM1963	2051650	2053148	+	cytoplasmic alpha-amylase
STM1964	2053188	2053624	-	putative outer membrane lipoprotein
STM1965	2053721	2055004	+	putative membrane component of transport system
STM1969	2056526	2058218	+	basal-body MS (membrane and supramembrane)-ring and collar protein
STM1970	2058194	2059206	+	flagellar biosynthesis protein
STM1972	2059886	2061276	+	flagellum-specific ATP synthase
STM1973	2061282	2061741	+	flagellar FliJ protein
STM1975	2063043	2063527	+	flagellar biosynthesis
STM1976	2063521	2064536	+	flagellar biosynthesis protein
STM1977	2064519	2064946	+	flagellar biosynthesis protein
STM1979	2065310	2066060	+	flagellar biosynthesis protein
STM1980	2066060	2066339	+	flagellar biosynthesis protein
STM1981	2066332	2067142	+	putative flagellar biosynthetic protein
STM1982	2067341	2068047	+	positive transcriptional regulator of capsular/exo- polysaccharide synthesis (LuxR/UhpA family)
STM1984	2068397	2068636	+	putative cytoplasmic protein
STM1986	2068937	2069761	+	putative hydrolase of the HAD superfamily
STM1987	2069740	2071466	-	putative inner membrane protein
STM1988	2071617	2071862	-	putative cytoplasmic protein
STM1989	2071879	2072802	-	putative inner membrane protein
STM1990	2072966	2073886	+	putative permease
STM1992	2074326	2075768	-	DNA cytosine methylase
STM1993	2075830	2076533	-	putative hydrolase
STM1996	2079222	2079448	-	putative cold-shock protein
STM2001	2082348	2083145	+	putative inner membrane protein
STM2005	2084449	2084928	+	putative endoprotease
STM2009	2091304	2092770	-	AMP nucleosidase
STM2013	2094374	2095831	-	putative MATE family transport protein
STM2015	2096293	2097236	-	putative periplasmic protein
STM2016	2097300	2098383	-	nicotinate-nucleotide dimethylbenzimidazole-P phosphoribosyl transferase
STM2019	2099679	2101205	-	synthesis of vitamin B12 adenosyl cobalamide precursor
STM2021	2102020	2102703	-	synthesis of vitamin B12 adenosyl cobalamide precursor
STM2022	2102684	2102971	-	synthesis of vitamin B12 adenosyl cobalamide precursor
STM2023	2102967	2103709	-	synthesis of vitamin B12 adenosyl cobalamide precursor
STM2024	2103701	2104422	-	synthesis of vitamin B12 adenosyl cobalamide precursor
STM2025	2104411	2105212	-	synthesis of vitamin B12 adenosyl cobalamide precursor
STM2028	2106721	2107781	-	synthesis of vitamin B12 adenosyl cobalamide precursor
STM2032	2109681	2110825	-	synthesis of vitamin B12 adenosyl cobalamide precursor
STM2034	2111463	2112428	-	synthesis of vitamin B12 adenosyl cobalamide precursor
STM2036	2114396	2115320	-	propanediol utilization protein
STM2037	2115524	2116324	-	propanediol utilization protein
STM2038	2116837	2117127	+	propanediol utilization protein
STM2057	2131430	2132651	+	propanediol utilization propionate kinase
STM2059	2133645	2133993	-	putative cytoplasmic protein
STM2060	2134225	2135296	-	putative inner membrane protein
STM2061	2135402	2135880	-	DNA gyrase inhibitor
STM2062	2136022	2137200	-	DD-carboxypeptidase
STM2063	2137318	2138096	-	hydrogen sulfide production membrane anchoring protein
STM2064	2138079	2138665	-	hydrogen sulfide production iron-sulfur subunit
STM2065	2138672	2140956	-	hydrogen sulfide production membrane anchoring protein
STM2067	2144242	2145688	+	exonuclease I
STM2068	2145824	2147195	-	putative APC family amino acid transport protein
STM2069	2147468	2148394	-	putative LysR family transcriptional regulator
STM2070	2148428	2149265	-	putative dehydratase
STM2071	2149600	2150511	+	ATP phosphoribosyltransferase
STM2072_hisD	2150600	2151918	+	histidinal dehydrogenase
STM2073	2151904	2152994	+	histidinol phosphate aminotransferase
STM2074	2152980	2154058	+	imidazole glycerol-phosphate dehydratase
STM2075	2154045	2154648	+	glutamine amidotransferase
STM2077	2155353	2156143	+	imidazole glycerol phosphate synthase
STM2078	2156131	2156748	+	phosphoribosyl-AMP cyclohydrolase
STM2098	2178954	2179862	-	putative glucose-1-phosphate uridylyltransferase, non-catalytic subunit
STM2101	2182656	2183946	-	putative galactokinase
STM2102	2183958	2185448	-	putative export protein
STM2103	2185569	2186974	-	putative UDP-glucose lipid carrier transferase
STM2105	2188498	2189946	-	mannose-1-phosphate
STM2106	2189937	2191171	-	putative glycosyl transferase
STM2109	2192601	2193734	-	GDP-D-mannose dehydratase
STM2110	2193746	2194312	-	putative acyltransferase
STM2111	2194316	2195070	-	putative transferase
STM2112	2195075	2196296	-	putative colanic acid polymerase
STM2114	2197478	2197981	-	putative acyl transferase
STM2116	2198898	2201068	-	putative tyrosine-protein kinase
STM2118	2201509	2202775	-	putative polysaccharide export protein
STM2119	2203306	2204903	+	putative inner membrane protein
STM2121	2206884	2207479	-	dUTPase
STM2122	2207556	2208212	-	uridine/cytidine kinase
STM2123	2208522	2211518	+	putative PAS/PAC domain protein
STM2124	2211486	2212521	-	3-methyl-adenine DNA glycosylase II
STM2125	2212475	2213841	+	putative heat shock protein (Hsp70/DnaK)
STM2126	2214267	2215523	+	putative HlyD family secretion protein
STM2127	2215507	2218645	+	putative outer membrane receptor
STM2128	2218634	2221726	+	putative resistance protein
STM2129	2221709	2223135	+	putative MFS family transport protein
STM2130	2223123	2224538	+	sensory kinase in two-component regulatoyr system wtih BaeR
STM2131	2224528	2225257	+	response regulator in two-component regulatory system with BaeS
STM2136	2229673	2231043	+	putative protease
STM2138	2232576	2232997	-	putative cytoplasmic protein
STM2142	2236257	2237540	+	putative MFS family transport protein
STM2143	2237524	2238541	+	putative glycohydrolase
STM2144	2238530	2239503	+	putative sugar kinase
STM2145	2239477	2240235	-	putative gntR family regulatory protein
STM2148	2242238	2242567	+	putative periplasmic protein
STM2154	2248463	2249583	-	putative ATP-binding protein
STM2156	2251999	2252469	+	putative 16.9 kd lipoprotein precursor
STM2157	2253228	2253703	-	putative cytoplasmic protein
STM2158	2253742	2254472	-	putative regulator
STM2159	2254458	2256156	-	putative sensor/kinase in regulatory system
STM2160	2256354	2257097	+	putative transcriptional repressor (MerR family)
STM2161	2257150	2257264	+	putative inner membrane protein
STM2162	2257245	2257992	-	putative ABC-type proline/glycine betaine transport system, permease component
STM2163	2257960	2258920	-	putative ABC-type proline/glycine betaine transport system, ATPase component
STM2165	2260073	2261002	-	putative ABC superfamily transport protein (bind_prot)
STM2166	2261171	2263480	-	periplasmic beta-D-glucoside glucohydrolase
STM2167	2263723	2265465	+	NADH independent D-lactate dehydrogenase
STM2168	2265523	2266483	-	D-alanyl-D-alanine endopeptidase
STM2169	2266636	2267234	-	putative transport protein
STM2170	2267347	2267951	+	putative DedA family, membrane protein
STM2172	2268827	2270275	-	putative outer membrane efflux protein
STM2174	2270722	2271672	-	putative nitrogen regulation protein
STM2175	2271769	2272969	-	putative monooxygenase
STM2176	2272977	2273628	-	putative glutathione S-transferase
STM2178	2274347	2275391	-	putative 1,2-dioxygenase protein
STM2179	2275396	2276760	-	putative sugar transporter
STM2180	2276873	2277788	+	putative LysR family transcriptional regulator
STM2181	2277907	2278318	+	putative effector of murein hydrolase LrgA
STM2182	2278301	2279010	+	putative transmembrane protein
STM2183	2279153	2280048	+	cytidine/deoxycytidine deaminase
STM2184	2280206	2280944	+	vancomycin sensitivity protein
STM2185	2280921	2281186	+	putative inner membrane protein
STM2186	2281379	2282632	+	putative NADPH-dependent glutamate synthase beta chain or related oxidoreductase
STM2187	2282612	2283861	+	putative dihydropyrimidine dehydrogenase
STM2188	2283936	2284958	-	methyl-galactoside transport protein
STM2189	2284962	2286494	-	galactose (methyl-galactoside) transport protein
STM2190	2286616	2287675	-	galactose transport protein
STM2191	2288113	2289224	-	GalR/LacI family transcriptional repressor of mgl operon
STM2192	2289285	2290436	-	putative inner membrane protein
STM2193	2290442	2291126	-	GTP cyclohydrolase I
STM2194	2291440	2292297	+	putative esterase
STM2195	2292286	2292681	-	putative transcriptional regulator
STM2196	2292680	2294053	-	putative D-serine dehydratase
STM2197	2294259	2295151	+	putative phosphoserine phosphatase
STM2198	2295178	2296506	+	putative regulatory protein
STM2199	2296550	2298554	-	outer membrane porin
STM2200	2298887	2300373	-	APC family lysine-specific permease
STM2201	2300546	2301422	-	putative LysR family transcriptional regulator
STM2202	2301518	2302579	+	putative inner membrane protein
STM2203	2302588	2303515	+	endonuclease IV
STM2204	2303580	2305281	-	fructose-specific transport protein
STM2205	2305285	2306234	-	fructose-1-phosphate kinase
STM2206	2306223	2307368	-	phosphoenolpyruvate-dependent sugar phosphotransferase system, EIIA 2
STM2207	2307722	2308903	+	proton efflux pump
STM2209	2309635	2309757	-	putative inner membrane protein
STM2211	2310492	2311295	+	putative elongation factor
STM2212	2311497	2312494	+	putative cobalamin synthesis protein
STM2213	2312516	2313243	+	putative permease
STM2214	2313640	2314229	+	putative lipoprotein
STM2215	2314547	2316111	+	putative membrane protein involved in resistance to lambda and N4 phages
STM2216	2316201	2318023	+	putative ABC transporter periplasmic binding protein
STM2217	2318014	2319127	+	putative ABC-type dipeptide/oligopeptide/nickel transport systems, permease component
STM2218	2319116	2320152	+	putative ABC-type dipeptide/oligopeptide/nickel transport systems, permease component
STM2219	2320141	2321743	+	putative ATPase component of ABC-type transport system
STM2220	2321747	2322104	-	putative cytoplasmic protein
STM2221	2322482	2323684	-	bicyclomycin resistance protein
STM2222	2323700	2324412	-	16S rRNA pseudouridylate 516 synthase
STM2223	2324547	2326307	+	putative ATP-dependent helicase
STM2226	2327473	2328494	-	nucleotide associated protein
STM2228	2328901	2330679	+	putative hydrolase of alkaline phosphatase superfamily
STM2246	2346688	2347348	+	response regulator in two-component regulatory system with NarQ (or NarX)
STM2255	2353682	2354293	-	periplasmic nitrate reductase
STM2256	2354294	2354743	-	periplasmic small subunit nitrate reductase of cytochrome C550
STM2257	2354859	2355741	-	ferredoxin-type protein
STM2258	2355715	2356425	-	ferredoxin-type protein
STM2259	2356417	2358914	-	periplasmic large subunit nitrate reductase
STM2260	2358900	2359176	-	periplasmic nitrate reductase
STM2262	2360058	2360552	+	ecotin
STM2263	2360761	2362417	-	putative ABC-type multidrug/protein/lipid transport system
STM2264	2362480	2363222	-	DNA repair system specific for alkylated DNA
STM2265	2363133	2364246	-	O6-methylguanine-DNA methyltransferase
STM2267	2365442	2366750	-	outer membrane protein 1b (ib;c)
STM2269	2367291	2369976	+	putative sensor/kinase in regulatory system
STM2270	2369978	2370643	+	LuxR/UhpA family response regulator in two-component regulatory system with RcsC
STM2271	2370746	2373608	-	sensory histidine kinase in two-component regulatory system with RcsB
STM2272	2373710	2376422	-	DNA gyrase, subunit A
STM2273	2376756	2377964	-	putative dehydratase protein
STM2274	2377973	2379304	-	putative permease
STM2275	2379342	2380232	+	putative gntR family regulatory protein
STM2276	2380219	2381043	+	3-demethylubiquinone-9 3-methyltransferase
STM2278	2383783	2384927	+	ribonucleoside-diphosphate reductase 1, beta subunit
STM2279	2384927	2385181	+	putative ferredoxin
STM2281	2386530	2387413	+	putative LysR family transcriptional regulator
STM2282	2387529	2388614	-	periplasmic glycerophosphodiester phosphodiesterase
STM2283	2388604	2390082	-	MFS family, sn-glycerol-3-phosphate transport protein
STM2284	2390063	2391863	+	sn-glycerol-3-phosphate dehydrogenase (anaerobic), large subunit
STM2285	2391840	2393112	+	sn-glycerol-3-phosphate dehydrogenase (anaerobic), membrane anchor subunit
STM2286	2393096	2394299	+	sn-glycerol-3-phosphate dehydrogenase (anaerobic), K-small subunit
STM2294	2401775	2402422	-	putative inner membrane protein
STM2296	2403066	2403680	-	aluminum inducible protein
STM2297	2403942	2405109	+	putative DegT/DnrJ/EryC1/StrS family
STM2298	2405099	2406095	+	putative glycosyl transferase
STM2301	2408950	2410613	+	putative melittin resistance protein
STM2304	2411317	2411585	-	polymyxin resistance protein B
STM2309	2415625	2417307	-	2-oxoglutarate decarboxylase
STM2310	2417381	2418690	-	isochorismate synthase
STM2311	2418777	2419095	-	putative inner membrane protein
STM2312	2419137	2419610	-	putative acyltransferase
STM2319	2429498	2429811	-	NADH dehydrogenase I chain K
STM2320	2429797	2430363	-	NADH dehydrogenase I chain J
STM2321	2430362	2430920	-	NADH dehydrogenase I chain I
STM2322	2430919	2431907	-	NADH dehydrogenase I chain H
STM2323	2431893	2434633	-	NADH dehydrogenase I chain G
STM2324	2434650	2436001	-	NADH dehydrogenase I chain F
STM2325	2435984	2436498	-	NADH dehydrogenase I chain E
STM2326	2436487	2438303	-	NADH dehydrogenase I chain C,D
STM2327	2438376	2439049	-	NADH dehydrogenase I chain B
STM2328	2439054	2439694	-	NADH dehydrogenase I chain A
STM2329	2439892	2440048	-	putative cytoplasmic protein
STM2330	2440124	2441072	-	LysR family NADH dehydrogenase transcriptional repressor
STM2331	2441981	2443208	+	putative aminotransferase (ortho)
STM2332	2443292	2443901	+	putative hydrolase of HD superfamily
STM2333	2443993	2445830	-	putative response regulator
STM2334	2445896	2446573	-	putative phosphatase
STM2335	2446566	2447072	-	putative cytoplasmic protein
STM2336	2447143	2447608	-	putative cytoplasmic protein
STM2337	2447927	2449140	+	acetate kinase A
STM2338	2449206	2451361	+	phosphotransacetylase
STM2339	2451564	2453099	+	putative integral membrane protein
STM2340	2453148	2454108	-	putative transketolase
STM2342	2454921	2456319	-	putative inner membrane protein
STM2344	2456686	2457135	-	putative phosphotransferase system
STM2345	2457374	2458401	+	putative transcriptional regulator
STM2346	2458407	2458972	-	putative NTP pyrophosphohydrolase
STM2347	2459018	2459581	-	putative phosphoesterase
STM2348	2459625	2460278	-	putative glutathione-S-transferase
STM2349	2460401	2461059	+	putative glutathione S-transferase
STM2350	2461174	2462078	+	putative sugar nucleotide epimerase
STM2351	2462130	2462906	-	histidine and lysine/arginine/ornithine transport protein
STM2352	2462917	2463636	-	histidine and lysine/arginine/ornithine transport protein
STM2353	2463621	2464320	-	histidine and lysine/arginine/ornithine transport system
STM2354	2464490	2465282	-	histidine transport protein
STM2355	2465510	2466303	-	lysine/arginine/ornithine transport protein
STM2356	2466581	2467163	-	3-octaprenyl-4-hydroxybenzoate carboxy-lyase
STM2357	2467177	2468589	-	putative amino acid transporter
STM2358	2468647	2469757	-	putative cytoplasmic protein
STM2359	2469752	2471185	-	putative amino acid transporter
STM2360	2471264	2472666	-	putative diaminopimelate decarboxylase
STM2361	2472865	2474299	+	putative regulatory protein
STM2362	2474335	2475866	-	amidophosphoribosyltransferase
STM2363	2475890	2476455	-	membrane protein required for colicin V production
STM2364	2476689	2477376	-	putative lipoprotein
STM2365	2477353	2478638	-	folylpolyglutamate synthase
STM2366	2478689	2479694	-	acetylCoA carboxylase, beta subunit
STM2367	2479753	2480427	-	putative DedA family
STM2368	2480461	2481290	-	pseudouridylate synthase I
STM2369	2481273	2482301	-	putative aspartate-semialdehyde dehydrogenase
STM2370	2482354	2483504	-	erythronate-4-phosphate dehydrogenase
STM2371	2483580	2484595	+	cell division protein
STM2372	2484592	2485782	-	putative transport protein
STM2373	2485950	2486331	-	putative cytoplasmic protein
STM2375	2486906	2487282	+	putative cytoplasmic protein
STM2376	2487274	2487800	+	putative periplasmic protein
STM2378	2488621	2489845	-	3-oxoacyl-[acyl-carrier-protein synthase I
STM2380	2492047	2492333	-	putative cytoplasmic protein
STM2381	2492355	2492921	-	putative cytoplasmic protein
STM2382	2492903	2493732	-	putative permease
STM2383	2493712	2494546	-	penicillin-insensitive murein DD-endopeptidase
STM2385	2495661	2496602	-	putative methylase
STM2386	2496745	2497310	+	putative Smr domain containing protein
STM2387	2497410	2497905	-	phosphohistidine phosphatase
STM2388	2498104	2500265	-	putative dehydrogenase
STM2389	2500251	2501573	-	putative acetyl-CoA acetyltransferase
STM2390	2501739	2502036	-	putative cytoplasmic protein
STM2391	2502255	2503701	+	transport of long-chain fatty acids
STM2392	2503762	2504530	-	lipoprotein precursor
STM2393	2504792	2505747	+	putative transport
STM2396	2507260	2508512	-	activator protein
STM2397	2508497	2510509	-	protein for signal transmission
STM2398	2510500	2511698	-	protein for signal transmission
STM2399	2512122	2513520	+	transporter protein
STM2400	2513796	2514053	-	putative inner membrane protein
STM2401	2514550	2515480	+	cold shock-induced palmitoleoyl transferase
STM2402	2516004	2517251	-	putative aminotransferase
STM2403	2517963	2518944	-	glucokinase
STM2404	2519120	2520367	+	putative chloride channel permease
STM2407	2523318	2523657	+	putative periplasmic protein
STM2408	2523718	2524969	-	manganese/divalent cation transport protein
STM2413	2529340	2529714	+	putative negative regulator
STM2414	2529716	2530108	+	putative negative regulator
STM2415	2530162	2531588	-	glutamate tRNA synthetase, catalytic subunit
STM2425	2537774	2538783	+	putative Na+-dependent transporter
STM2427	2539000	2541025	-	DNA ligase
STM2428	2541087	2542082	-	cell division protein involved in FtsZ ring
STM2429	2542287	2543066	+	required for sulfate transport
STM2430	2543157	2544201	+	subunit of cysteine synthase A and O-acetylserine sulfhydrolase A
STM2432	2544880	2546618	+	PEP-protein phosphotransferase
STM2433	2546647	2547168	+	glucose-specific IIA component
STM2442	2553716	2554596	-	thiosulfate permease W protein
STM2445	2556598	2557404	-	putative oxidoreductase
STM2446	2557627	2558537	-	putative iron-dependent peroxidase
STM2447	2558621	2559207	-	putative outer membrane lipoprotein
STM2448	2559258	2559707	-	putative inner membrane protein
STM2449	2559694	2560230	-	putative acetyltransferase
STM2450	2560324	2561201	+	N-acetylmuramoyl-l-alanine amidase I
STM2454	2564059	2565126	-	putative regulator ethanolamine operon
STM2458	2567250	2568624	-	ethanolamine ammonia-lyase, heavy chain
STM2460	2570023	2571264	-	putative transport protein
STM2466	2575542	2576566	-	putative phosphotransacetylase in ethanolamine utilization
STM2468	2577355	2578060	-	putative ethanolamine utilization protein
STM2469	2578022	2578510	-	putative ethanolamine utilization protein
STM2470	2578514	2578865	-	putative ethanol utilization carboxysome structural protein
STM2472	2579978	2582270	-	putative transferase
STM2473	2582515	2583479	+	transaldolase A
STM2474	2583487	2585499	+	transketolase 2 isozyme
STM2475	2585562	2585800	-	putative cytoplasmic protein
STM2476	2585920	2586980	-	putative periplasmic protein
STM2477	2587088	2587674	-	putative pyrophosphohydrolase
STM2478	2587855	2589165	+	putative beta-lactamase class C
STM2479	2589614	2591584	-	putative oxidoreductase
STM2480	2591746	2593461	+	sensory histidine kinase in two-component regulatory system with NarP (NarL)
STM2481	2593632	2596759	+	RND family aminoglycoside/multidrug efflux pump
STM2482	2597322	2597689	+	putative glutaredoxin family protein
STM2483	2597681	2598820	+	N-succinyl-diaminopimelate deacylase
STM2486	2601109	2601981	-	putative inner membrane protein
STM2487	2602103	2602982	-	phosphoribosylaminoimidazole-succinocarboxamide synthetase
STM2488	2602991	2604037	-	lipoprotein-34
STM2489	2604042	2604982	-	dihydrodipicolinate synthase
STM2491	2605621	2606108	+	thioredoxin dependent thiol peroxidase
STM2493	2606695	2607776	-	putative PerM family permease
STM2494	2607957	2609433	+	putative inner membrane or exported
STM2496	2609859	2610584	-	putative ATPase involved in DNA replication initiation
STM2497	2610655	2611956	-	NCS2 family uracil transport protein
STM2498	2612032	2612819	-	uracil phosphoribosyltransferase
STM2499	2613008	2614109	+	phosphoribosylaminoimidazole synthetase
STM2500	2614095	2614747	+	polyphosphate kinase
STM2501	2614919	2617002	+	polyphosphate kinase
STM2502	2617007	2618548	+	exopolyphosphatase
STM2504	2620894	2621031	-	putative cytoplasmic protein
STM2505	2621102	2621367	-	putative inner membrane protein
STM2506	2621198	2621401	+	putative inner membrane protein
STM2519	2651457	2652941	-	putative GTP-binding protein
STM2521	2654237	2654872	-	putative inner membrane protein
STM2522	2654871	2656161	-	histidine tRNA synthetase
STM2525	2658697	2659875	-	putative Fe-S-cluster redox enzyme
STM2526	2660070	2660510	-	nucleoside diphosphate kinase
STM2530	2662913	2665318	-	putative anaerobic dimethylsulfoxide reductase
STM2531	2665447	2667762	-	transglycosylase of penicillin-binding protein 1c
STM2532	2667763	2672709	-	putative inner membrane lipoprotein
STM2533	2672894	2673748	+	putative sulfurtransferase
STM2535	2675232	2676017	-	enhances serine sensitivity
STM2536	2676118	2677414	-	putative aminopeptidase
STM2537	2677648	2677857	-	hypothetical protein
STM2539	2678197	2680059	-	chaperone protein
STM2540	2680060	2680608	-	co-chaperone protein Hsc20
STM2541	2680771	2681105	-	putative regulator
STM2542	2681123	2681523	-	NifU homolog
STM2543	2681537	2682767	-	putative aminotransferase class-V
STM2544	2682932	2683441	-	hypothetical protein
STM2545	2683586	2684330	-	putative rRNA methylase
STM2546	2684427	2685239	+	inositol monophosphatase
STM2548	2686437	2687487	+	anaerobic sulfide reductase
STM2549	2687483	2688309	+	anaerobic sulfide reductase
STM2550	2688313	2689333	+	anaerobic sulfide reductase
STM2552	2690311	2690956	-	putative periplasmic or exported protein
STM2553	2691059	2692352	+	stationary phase inducible protein
STM2554	2692347	2693495	-	putative MFS family transport protein
STM2555	2693682	2695130	-	serine hydroxymethyltransferase
STM2557	2696564	2698176	+	transcriptional activator of cad operon
STM2558	2698371	2699868	+	APC family lysine/cadaverine transport protein
STM2559	2699938	2702095	+	lysine decarboxylase 1
STM2560	2702140	2703611	+	putative POT family, di-/tripeptide transport protein
STM2561	2703660	2704089	-	regulatory protein (P-II) for nitrogen assimilation by glutamine synthetase (ATase)
STM2562	2704075	2705423	-	putative transcriptional regulator of two-component regulator protein
STM2563	2705409	2706173	-	putative transcriptional regulator of two-component regulator protein (EBP familiiy)
STM2564	2706175	2707617	-	putative sensory kinase in regulatory system
STM2565	2708255	2712297	-	phosphoribosylformylglycinamidine synthetase
STM2566	2712164	2712397	+	putative periplasmic protein
STM2567	2712385	2713942	+	putative periplasmic amino acid binding protein
STM2569	2714569	2715216	-	putatative phosphoserine phosphatase
STM2570	2715208	2716578	-	putative phosphotransferase system IIB components
STM2572	2717577	2718437	+	putative ABC superfamily transport protein
STM2575	2720727	2721653	+	putative LysR family transcriptional regulator
STM2577	2722063	2722460	-	holo-[acyl-carrier-protein synthase, subunit
STM2578	2722443	2723184	-	carries out condensation and ring closure step after PdxA in pyridoxine biosynthesis
STM2579	2723186	2723914	-	gap repair gene
STM2580	2723926	2724842	-	GTPase
STM2581	2724828	2725518	-	RNase III, ds RNA
STM2582	2725782	2726767	-	leader peptidase (signal peptidase I), serine protease
STM2583	2726773	2728572	-	GTP-binding elongation factor
STM2637	2777317	2777808	-	regulator of sigma E (sigma 24) factor
STM2638	2777793	2778768	-	anti sigma E (sigma 24) factor, negative regulator
STM2639	2778749	2779417	-	anti sigma E (sigma 24) factor, negative regulator
STM2640	2779431	2780026	-	sigma E (sigma 24) factor of RNA polymerase
STM2641	2780431	2782053	+	quinolinate synthetase, B protein
STM2642	2782038	2782789	-	putative transferase
STM2643	2782896	2784240	+	ATP-dependent RNA helicase
STM2644	2784258	2785163	-	putative LysR family transcriptional regulator
STM2645	2785247	2785847	+	putative transport protein
STM2646	2785909	2786307	-	putative formate acetyltransferase
STM2647	2786599	2787300	+	uracil-DNA-glycosylase
STM2649	2788647	2789076	+	thioredoxin 2, redox factor
STM2650	2789149	2789829	+	putative cytoplasmic protein
STM2651	2789870	2792543	+	putative acetyl-CoA synthetase
STM2652	2792640	2794013	+	phosphatidylserine synthase
STM2653	2794045	2794381	+	putative outer membrane lipoprotein
STM2654	2794378	2795691	-	MFS family alpha-ketoglutarate permease
STM2655	2795783	2796245	-	putative cytoplasmic protein
STM2661	2804822	2805564	-	putative inner membrane protein
STM2662	2805550	2806542	-	pseudouridine synthase
STM2663	2806644	2807399	+	putative lipoprotein
STM2665	2807659	2808009	+	ribosome associated factor
STM2667	2808249	2809420	+	chorismate mutase P
STM2668	2809381	2810296	-	putative cytoplasmic protein
STM2669	2810347	2811477	-	chorismate mutase T
STM2670	2811478	2812684	-	3-deoxy-D-arabinoheptulosonate-7-phosphate synthase
STM2671	2812974	2813506	+	putative periplasmic protein
STM2672	2813485	2814719	+	putative diguanylate cyclase/phosphodiesterase
STM2673	2814876	2815242	-	50S ribosomal subunit protein L19
STM2674	2815264	2816045	-	tRNA (guanine-7-)-methyltransferase
STM2675	2816076	2816636	-	16S rRNA processing protein
STM2677	2817205	2818579	-	4.5S-RNP protein
STM2678	2818732	2819523	+	putative cytochrome c-type biogenesis protein
STM2679	2819588	2820829	+	putative membrane protein
STM2682	2822177	2822375	-	putative cytoplasmic protein
STM2683	2822288	2823181	+	putative kinase
STM2684	2823254	2824928	+	protein used in recombination and DNA repair
STM2686	2825581	2825881	-	putative cytoplasmic protein
STM2687	2825861	2826337	-	putative oligoketide cyclase/lipid transport protein
STM2688	2826477	2826969	+	small protein B
STM2690	2839117	2840531	+	putative outer membrane efflux protein
STM2691	2840521	2842708	+	putative ABC transporter transmembrane region
STM2692	2842716	2843879	+	putative HlyD family secretion protein
STM2773	2916374	2917496	+	putative glycosyl transferase
STM2777	2923593	2925778	-	TonB-dependent siderophore receptor protein
STM2781	2928377	2929306	+	virK-like protein
STM2783	2931217	2932237	-	putative nickel transporter
STM2784	2932363	2933785	-	tricarboxylic transport regulatory protein
STM2785	2933765	2934446	-	tricarboxylic transport regulatory protein
STM2786	2934587	2935571	+	tricarboxylic transport protein
STM2787	2935577	2936017	+	tricarboxylic transport protein
STM2788	2936022	2937542	+	tricarboxylic transport protein
STM2789	2937829	2938822	+	putative cytoplasmic protein
STM2790	2938834	2940116	+	putative sarcosine oxidase-like protein
STM2791	2940126	2941586	+	NADP-dependent succinate-semialdehyde dehydrogenase I
STM2792	2941587	2942884	+	4-aminobutyrate aminotransferase
STM2794	2944444	2945133	+	putative GntR family transcriptional repressor
STM2795	2945155	2945613	-	putative LysM domain protein
STM2797	2946045	2946344	+	putative arsR family regulatory protein
STM2798	2946343	2946881	+	putative rhodanese-related sulfurtransferase
STM2799	2947229	2947770	-	DNA-binding protein with chaperone activity
STM2800	2948316	2948778	+	putative inner membrane protein
STM2801	2948813	2949174	-	putative cytoplasmic protein
STM2802	2949313	2949651	+	putative inner membrane protein
STM2803	2949735	2951074	-	putative gntR family regulatory protein
STM2805	2951846	2952106	+	glutaredoxin-like protein
STM2807	2952470	2954630	+	ribonucleoside diphosphate reductase 2, alpha subunit
STM2808	2954629	2955600	+	ribonucleoside-diphosphate reductase 2, beta subunit
STM2809	2955884	2957157	+	glycine/betaine/proline transport protein
STM2810	2957137	2958214	+	glycine/betaine/proline transport protein
STM2812	2959431	2960628	+	putative inner membrane protein
STM2813	2960989	2961655	+	transcriptional repressor of emrAB operon
STM2814	2961770	2962954	+	multidrug resistance secretion protein
STM2815	2962959	2964509	+	putative MFS superfamily multidrug transport protein
STM2817	2966274	2966800	-	quorum sensing protein
STM2818	2966939	2968511	-	gamma-glutamate-cysteine ligase
STM2819	2968572	2969014	-	putative inner membrane protein
STM2820	2968994	2969569	-	putative phosphoglucomutase
STM2827	2971375	2974015	-	alanyl-tRNA synthetase
STM2828	2974241	2974751	-	regulator
STM2829	2974858	2976032	-	DNA strand exchange and recombination protein
STM2830	2976004	2976510	-	putative cytoplasmic protein
STM2833	2978859	2979843	+	PTS family, glucitol/sorbitol-specific IIB component
STM2834	2979844	2980217	+	PTS family glucitol/sorbitol-specific protein
STM2835	2980216	2981008	+	glucitol (sorbitol)-6-phosphate dehydrogenase
STM2836	2981072	2981443	+	putative glucitol (srl) operon regulatory protein
STM2837	2981625	2982414	+	transcriptional repressor for glucitol operon
STM2838	2982428	2983372	+	putative polysialic acid capsule expression protein
STM2840	2985066	2986514	+	putative flavoprotein
STM2842	2987741	2989997	-	hydrogenase maturation protein
STM2843	2990127	2990684	-	electron transport protein (FeS center) from formate to hydrogen
STM2846	2992172	2992596	-	protein for processing of HycE
STM2852	2998377	2998997	-	hydrogenase-3, iron-sulfur subunit
STM2853	2999131	2999606	-	transcriptional repressor of hyc and hyp operons
STM2854	2999794	3000158	+	guanine-nucleotide binding protein in formate-hydrogenlyase system
STM2855	3000215	3001099	+	hydrogenase-3 accessory protein
STM2856	3001076	3001362	+	putative hydrogenase expression/formation protein
STM2857	3001351	3002483	+	putative hydrogenase expression/formation protein
STM2858	3002516	3003490	+	putative hydrogenase expression/formation protein
STM2859	3003696	3005787	+	formate hydrogen-lyase transcriptional activator for fdhF, hyc and hyp operons
STM2860	3005849	3006207	-	putative cytoplasmic protein
STM2861	3006369	3007292	+	fur regulated Salmonella iron transporter
STM2862	3007281	3008110	+	fur regulated Salmonella iron transporter
STM2863	3008100	3008967	+	fur regulated Salmonella iron transporter
STM2864	3008951	3009806	+	fur regulated Salmonella iron transporter
STM2866	3010974	3011735	-	transcriptional regulator
STM2867	3012114	3013008	-	araC family bacterial regulatory helix-turn-helix protein
STM2869	3013795	3014479	-	putative flagellar biosynthesis/type III secretory pathway protein
STM2870	3014432	3015046	-	putative inner membrane protein
STM2871	3015003	3015761	-	cell invasion protein
STM2872	3015758	3016069	-	cytoplasmic cell invasion protein
STM2874	3016349	3017527	-	cell invasion protein
STM2875	3017838	3018772	+	regulatory helix-turn-helix proteins, araC family
STM2876	3019846	3021524	+	invasion genes transcription activator
STM2877	3021534	3022024	+	cell invasion protein
STM2879	3023696	3024095	-	chaparone related to virulence
STM2881	3024419	3024672	-	putative acyl carrier protein
STM2884	3027864	3029098	-	cell invasion protein
STM2885	3029121	3030909	-	cell invasion protein
STM2886	3030905	3031414	-	surface presentation of antigens
STM2887	3031540	3032617	-	surface presentation of antigens
STM2888	3032597	3033394	-	surface presentation of antigens
STM2890	3033678	3034357	-	surface presentation of antigens
STM2891	3034342	3035261	-	surface presentation of antigens
STM2892	3035253	3036271	-	surface presentation of antigens
STM2893	3036263	3036711	-	surface presentation of antigens
STM2894	3036684	3037979	-	surface presentation of antigens
STM2895	3037976	3038390	-	surface presentation of antigens
STM2896	3038407	3040471	-	invasion protein
STM2897	3040489	3041615	-	invasion protein
STM2898	3041604	3043292	-	outer membrane invasion protein
STM2899	3043289	3043939	-	invasion protein
STM2907	3048768	3049434	+	serine/threonine specific protein phosphatase 2
STM2911	3053286	3054501	-	putative permease
STM2913	3055556	3057059	-	putative permease
STM2914	3057049	3058006	-	putative nucleoside-diphosphate-sugar epimerase
STM2916	3058820	3059473	-	putative fuculose phosphate aldolase
STM2917	3059455	3060728	-	putative tRNA synthase
STM2918	3060711	3061645	-	3-hydroxyisobutyrate dehydrogenase
STM2919	3061819	3062595	+	putative regulatory protein, deoR family
STM2920	3062614	3063025	-	putative transcriptional regulator
STM2921	3063183	3063782	+	putative flavoprotein
STM2922	3063774	3065209	+	putative 3-polyprenyl-4-hydroxybenzoate decarboxylase
STM2923	3065213	3065456	+	putative cytoplasmic protein
STM2925	3066556	3067808	-	lipoprotein
STM2926	3067865	3068508	-	L-isoaspartate protein carboxylmethyltransferase type II
STM2927	3068485	3069256	-	survival protein, protein damage control
STM2928	3069227	3070287	-	putative hydrogenase subunit
STM2929	3070273	3070766	-	2C-methyl-d-erythritol-2,4-cyclodiphosphate synthase
STM2930	3070752	3071474	-	4-phosphocytidyl-2C-methyl-D-erythritol synthase
STM2931	3071481	3071803	-	putative Septum formation initiator
STM2932	3071983	3072349	-	putative inner membrane protein
STM2933	3072357	3072975	-	adenosine 5'-phosphosulfate kinase
STM2935	3074398	3075386	-	ATP-sulfurylase, subunit 1
STM2936	3075546	3076603	+	aminopeptidase in alkaline phosphatase isozyme conversion
STM2949	3092941	3093303	+	putative synthase
STM2952	3097371	3098681	-	enolase
STM2953	3098752	3100399	-	CTP synthetase
STM2954	3100617	3101417	-	putative pyrophosphatase
STM2957	3105173	3106475	-	putative RNA methyltransferase
STM2958	3106516	3109282	+	sensory histidine kinase
STM2959	3109326	3110474	-	putative glycerate kinase 2
STM2960	3110546	3111898	-	d-glucarate dehydratase
STM2961	3111907	3113260	-	putative d-glucarate dehydratase
STM2962	3113244	3114615	-	putative MFS superfamily D-glucarate permease
STM2967	3117274	3117828	-	interacts with secY
STM2969	3118838	3120213	+	putative nucleotide binding
STM2970	3120766	3122067	+	putative HAAAP family serine transport protein
STM2971	3122115	3123493	+	L-serine dehydratase
STM2972	3123584	3124419	+	exonuclease IX, 5'-3' exonuclease
STM2973	3124511	3125672	-	L-1,2-propanediol oxidoreductase
STM2974	3125676	3126333	-	L-fuculose-1-phosphate aldolase
STM2976	3128214	3130001	+	L-fucose isomerase
STM2977	3130090	3131520	+	L-fuculokinase
STM2978	3131509	3131944	+	conserved protein of fucose operon
STM2979	3131988	3132712	+	positive regulator of the fuc operon
STM2980	3132771	3133884	-	putative SAM-dependent methyltransferase
STM2981	3133864	3134271	-	putative small membrane protein
STM2982	3134278	3135307	-	regulator of gcv operon
STM2983	3135542	3135781	-	putative lipoprotein
STM2984	3135952	3137167	+	putative selenocysteine lyase
STM2986	3137905	3138797	+	putative integral membrane protein
STM2987	3138849	3139663	-	putative enzyme
STM2988	3139765	3140878	-	membrane-bound lytic murein transglycosylase A
STM2991	3141362	3142622	-	N-acetylmuramoyl-L-alanine amidase
STM2992	3142836	3144179	+	N-alpha-acetylglutamate synthase
STM2994	3146114	3149659	-	exonuclease V, beta chain
STM2995	3149652	3152551	-	protease III
STM2996	3152718	3156100	-	exonuclease V, subunit
STM2997	3156105	3156436	-	prepilin peptidase dependent protein C
STM3000	3157368	3157838	-	prepilin peptidase dependent protein A
STM3001	3158023	3158825	-	thymidylate synthetase
STM3002	3158824	3159709	-	phosphatidylglycerol-prolipoprotein diacylglyceryl transferase
STM3003	3159915	3162181	-	general PTS system enzyme I, transcriptional regulator with NPR and NTR proteins
STM3004	3162174	3162715	-	putative invasion protein
STM3005	3163375	3164082	+	methyl-directed mismatch repair protein
STM3006	3164250	3164977	+	putative integral membrane transport protein
STM3008	3165544	3166596	+	putative aldo/keto reductase
STM3009	3166683	3167898	-	putative efflux protein
STM3010	3167878	3170049	-	2-acylglycerophospho-ethanolamine acyl transferase
STM3011	3170619	3171658	+	transcriptional repressor of galETK operon
STM3012	3171660	3172691	+	putative transcriptional regulator
STM3013	3172701	3173975	-	diaminopimelate decarboxylase
STM3014	3174070	3175016	+	positive LysR family transcriptional regulator
STM3016	3175808	3177396	-	L-arabinose: proton symport protein
STM3018	3178398	3179243	-	putative pectin degrading enzyme
STM3019	3179664	3180851	-	putative acetyl-CoA acetyltransferase
STM3021	3181899	3182387	+	putative inner membrane protein
STM3022	3182529	3183758	+	putative transport protein
STM3038	3197581	3198339	-	putative metalloendopeptidase
STM3039	3198593	3199149	+	isopentenyldiphosphate isomerase
STM3040	3199225	3200753	-	constitutive lysine tRNA synthetase
STM3041	3200752	3201633	-	peptide chain release factor RF-2
STM3042	3201955	3203704	-	ssDNA exonuclease
STM3043	3203694	3204423	-	protein disulfide isomerase II
STM3044	3204431	3205339	-	site-specific recombinase
STM3045	3205420	3205961	+	flavodoxin 2
STM3046	3206014	3206441	-	putative inner membrane protein
STM3048	3206911	3207904	+	putative aminomethyltransferase
STM3049	3208020	3208691	-	putative hemolysin
STM3050	3208843	3209169	-	putative cytoplasmic protein
STM3052	3210794	3211694	-	putative outer membrane protein
STM3054	3215179	3215582	-	glycine cleavage complex protein H
STM3055	3215594	3216838	-	glycine cleavage complex protein T
STM3056	3217143	3218357	-	putative monooxygenase
STM3058	3219646	3220976	-	proline aminopeptidase P II
STM3059	3220988	3221572	-	putative cytoplasmic protein
STM3062	3223285	3224530	-	D-3-phosphoglycerate dehydrogenase
STM3063	3224783	3225457	-	constitutive ribosephosphate isomerase
STM3064	3225578	3226489	+	inhibitor of replication initiation
STM3065	3226755	3227512	-	putative periplasmic immunogenic protein
STM3066	3227595	3228243	-	putative LYSE family amino acid transport protein
STM3067	3228430	3229302	-	putative membrane protein
STM3068	3229517	3230610	-	fructose-bisphosphate aldolase
STM3069	3230698	3231872	-	phosphoglycerate kinase
STM3070	3231883	3233099	-	D-erythrose 4-phosphate dehydrogenase
STM3073	3234333	3235040	+	putative ABC-type cobalt transport system
STM3077	3238653	3239424	+	putative Zn-dependent proteases with possible chaperone function
STM3078	3239525	3240457	-	agmatinase
STM3086	3248933	3251005	-	arginine decarboxylase
STM3088	3251170	3251347	+	putative cytoplasmic protein
STM3089	3251344	3251654	-	putative inner membrane protein
STM3090	3251684	3252853	+	methionine adenosyltransferase 1
STM3091	3253334	3254740	+	MFS family galactose:proton symporter
STM3093	3255348	3256118	+	DNA-specific endonuclease I
STM3094	3256128	3256926	+	putative cytoplasmic protein
STM3095	3256934	3257893	+	glutathione synthetase
STM3096	3258095	3258672	+	putative transcriptional regulator
STM3097	3258658	3259088	+	putative endonuclease involved in recombination
STM3100	3260944	3261655	+	putative enzyme with a TIM-barrel fold
STM3101	3261664	3262240	+	putative integral membran resistance protein
STM3103	3262525	3263128	+	putative xanthosine triphosphate pyrophosphatase
STM3104	3263105	3264257	+	putative oxidase
STM3105	3264348	3265374	-	putative periplasmic protein
STM3106	3265488	3266704	-	periplasmic L-asparaginase II
STM3107	3266723	3267453	-	putative periplasmic protein
STM3109	3267818	3268554	-	putative S-adenosylmethionine-dependent methyltransferase
STM3110	3268692	3269744	+	adenine DNA glycosylase
STM3111	3269761	3270047	+	putative cytoplasmic protein
STM3112	3270160	3271245	+	membrane-bound lytic murein transglycosylase C
STM3114	3272780	3275026	-	ornithine decarboxylase isozyme
STM3115	3275329	3276047	+	putative inner membrane protein
STM3126	3285419	3286924	-	putative amino acid transporter
STM3128	3287516	3288828	-	putative oxidoreductase
STM3129	3288967	3290463	+	putative NAD-dependent aldehyde dehydrogenase
STM3131	3290979	3291471	-	putative cytoplasmic protein
STM3132	3292190	3293120	-	putative xylanase
STM3133	3293152	3294035	-	putative amidohydrolase
STM3134	3294426	3295741	-	putative permease
STM3135	3296082	3297319	+	putative mannonate hydrolase
STM3136	3297418	3298902	+	putative D-mannonate oxidoreductase
STM3137	3298901	3300326	+	putative uronate isomerase
STM3138	3300626	3301691	-	putative methyl-accepting chemotaxis protein
STM3139	3302354	3304221	-	glutathionylspermidine synthetase
STM3140	3304428	3305303	+	putative glutathione S-transferase
STM3142	3306081	3307138	-	putative ferrichrome-binding periplasmic protein
STM3143	3307209	3307470	-	hydrogenase-2 operon protein
STM3144	3307485	3307840	-	putative hydrogenase expression/formation protein
STM3145	3307819	3308320	-	putative hydrogenase
STM3146	3308300	3308805	-	putative processing element for hydrogenase-2
STM3147	3308794	3310511	-	hydrogenase-2, large subunit
STM3148	3310494	3311684	-	putative cytochrome Ni/Fe component of hydrogenase-2
STM3149	3311662	3312663	-	unknown
STM3150	3312651	3313785	-	putative Ni/Fe hydrogenases, small subunit
STM3151	3313959	3314257	-	putative cytoplasmic protein
STM3152	3314331	3315981	-	putative methyl-accepting chemotaxis protein
STM3153	3316281	3316784	-	putative membrane-associated protein
STM3154	3317055	3317570	-	putative ATP-dependent RNA helicase-like protein
STM3157	3318573	3319471	+	putative oxidoreductase
STM3158	3319584	3320023	-	uptake of enterochelin
STM3159	3320016	3320763	-	uptake of enterochelin
STM3160	3320743	3320892	-	putative inner membrane protein
STM3161	3320989	3322189	+	cystathionine beta-lyase
STM3162	3322318	3322988	+	putative DedA family membrane protein
STM3163	3323052	3323983	-	putative AraC/XylS family transcriptional regulator
STM3164	3324131	3325307	+	putative alcohol dehydrogenase
STM3165	3325401	3326240	+	2,5-diketo-D-gluconate reductase A
STM3166	3326406	3327890	+	putative cation transporter
STM3167	3327929	3328390	+	putative diadenosine tetraphosphate (Ap4A) hydrolase
STM3172	3334474	3335897	-	suppressor of ftsI
STM3173	3335960	3336706	-	1-acyl-sn-glycerol-3-phosphate acyltransferase
STM3176	3340261	3340668	-	putative outer membrane protein
STM3177	3340793	3341464	+	putative transcriptional regulator
STM3178	3341450	3342810	+	putative sensory histidine kinase in regulatory system
STM3179	3342906	3343498	+	NADPH specific quinone oxidoreductase
STM3180	3343518	3343844	+	putative cytoplasmic protein
STM3181	3343969	3345861	-	DNA topoisomerase IV, subunit B
STM3182	3345889	3346480	-	putative esterase
STM3183	3346470	3347308	-	cyclic 3',5'-adenosine monophosphate phosphodiesterase
STM3184	3347322	3347753	-	putative cytoplasmic protein
STM3185	3347741	3348385	-	putative resistance protein
STM3186	3348574	3350049	+	outer membrane channel
STM3187	3350249	3350933	+	putative inner membrane protein
STM3188	3350926	3352102	+	putative glutathionylspermidine synthase
STM3189	3352164	3353007	-	putative cytoplasmic protein
STM3190	3353081	3353866	+	putative divalent heavy-metal cations transporter
STM3191	3354502	3355474	+	putative arylsulfate sulfotransferase
STM3192	3355510	3356304	+	putative arylsulfate sulfotransferase
STM3193	3356317	3356995	+	putative thiol-disulfide isomerase and thioredoxin
STM3194	3357004	3357687	+	putative disulfide isomerase
STM3195	3357858	3358525	-	3,4 dihydroxy-2-butanone-4-phosphate synthase
STM3196	3358881	3359247	+	putative cytoplasmic protein
STM3197	3359321	3359539	-	rpoS dependent glycogen biosynthesis protein
STM3198	3359775	3360408	+	putative inner membrane protein
STM3199	3360413	3362106	+	putative membrane protein
STM3200	3362566	3364011	-	putative sugar nucleotide transferase domain of ADP-L-glycero-D-manno-heptose synthase
STM3201	3364047	3366905	-	adenylyl transferase for glutamine synthetase
STM3202	3367008	3368315	-	putative cytoplasmic protein
STM3203	3368551	3369165	+	putative SH3 domain protein
STM3204	3369216	3370469	+	tRNA nucleotidyl transferase
STM3205	3370574	3371408	-	bacitracin resistance
STM3207	3371947	3372570	+	putative inner membrane protein
STM3208	3372821	3373849	-	putative O-sialoglycoprotein endopeptidase
STM3210	3374504	3376258	+	DNA primase
STM3211	3376224	3378255	+	sigma D factor of RNA polymerase
STM3212	3378379	3378896	-	G/U mismatch specific DNA glycosylase
STM3215	3380156	3380812	+	putative transcriptional regulator
STM3217	3382762	3384294	-	aerotaxis sensor receptor
STM3218	3384796	3386091	+	putative acetylornithine aminotransferase
STM3219	3386250	3388280	+	2,4-dieonyl-coa reductase
STM3220	3388361	3389508	-	putative methyltransferase
STM3223	3390994	3392011	+	putative dehydrogenase
STM3224	3392272	3393252	+	putative resistance protein
STM3225	3393495	3394751	+	putative dicarboxylate permease
STM3227	3395854	3396250	+	putative outer membrane protein
STM3228	3396379	3396763	+	putative periplasmic protein
STM3230	3397113	3397511	+	putative inner membrane protein
STM3231	3397491	3397807	+	putative inner membrane protein
STM3232	3397952	3398437	+	putative membrane-associated protein
STM3233	3398493	3399491	+	putative glutathione S-transferase
STM3234	3399606	3399980	+	putative inner membrane protein
STM3235	3400019	3400924	-	putative LysR family transcriptional regulator
STM3236	3401007	3401721	+	putative cytoplasmic protein
STM3239	3403358	3404698	-	putative HAAAP family transport protein
STM3240	3405005	3406374	-	L-serine deaminase
STM3241	3406439	3408748	-	pyruvate formate-lyase 4
STM3243	3410041	3411383	-	HAAAP family L-threonine/ L-serine permease
STM3244	3411393	3412399	-	threonine dehydratase
STM3245	3412480	3413427	-	transcriptional activator of tdc operon
STM3247	3415217	3416374	-	glycerate kinase
STM3248	3416460	3417368	-	tartronate semialdehyde reductase (TSAR)
STM3249	3417376	3418158	-	2-dehydro-3-deoxy-galactarate Aldolase
STM3258	3428111	3428586	+	galactitol-specific enzyme IIA of phosphotransferase system
STM3259	3428605	3428901	+	PTS family galactitol-specific enzyme IIB
STM3260	3428893	3430278	+	PTS family galactitol-specific enzyme IIC
STM3261	3430310	3431365	+	galactitol-1-phosphate dehydrogenase
STM3262	3431463	3432249	+	transcriptional regulator of sugar metabolism
STM3264	3433323	3435376	+	putative transglycosylase
STM3265	3435322	3435729	+	putative endonuclease
STM3266	3435741	3436341	+	putative phosphoheptose isomerase
STM3267	3436340	3436926	+	putative periplasmic protein
STM3269	3437749	3438277	+	putative intracellular proteinase
STM3270	3438257	3438710	-	putative cytoplasmic protein
STM3271	3438718	3439055	+	putative cytoplasmic protein
STM3272	3439042	3439555	-	putative ABC superfamily transport protein
STM3273	3439539	3440078	-	putative lipid carrier protein
STM3274	3440269	3441275	+	putative protease
STM3275	3441247	3442162	+	putative protease
STM3280	3446192	3448132	-	cysteine sulfinate desulfinase
STM3281	3448260	3449151	-	lipoprotein, cell division
STM3282	3449254	3451401	-	polynucleotide phosphorylase
STM3287	3456320	3457839	-	L factor
STM3293	3461859	3462207	-	preprotein translocase IISP family protein
STM3294	3462414	3463767	-	phosphoglucosamine mutase
STM3295	3463744	3464606	-	7,8-dihydropteroate synthase
STM3296	3464697	3466631	-	ATP-dependent zinc-metallo protease
STM3297	3466735	3467374	-	23S rRNA methyltransferase
STM3299	3467937	3468425	-	transcription elongation factor
STM3300	3468641	3470094	+	D-alanyl-D-alanine carboxypeptidase
STM3301	3470226	3471410	-	putative GTP-binding protein
STM3303	3472508	3472781	-	50S ribosomal subunit protein L27
STM3305	3473342	3474325	+	octaprenyl diphosphate synthase
STM3306	3474541	3474844	+	regulatory factor of maltose metabolism
STM3307	3474902	3476173	-	UDP-N-acetylglucosamine 1-carboxyvinyltransferase
STM3308	3476215	3476508	-	putative BolA family transcriptional regulator
STM3309	3476657	3476967	-	putative STAS domain protein
STM3310	3476953	3477603	-	putative ABC superfamily transport protein
STM3311	3477607	3478173	-	putative ABC superfamily transport protein
STM3312	3478163	3478963	-	putative ABC superfamily transport protein
STM3313	3478953	3479777	-	putative ABC superfamily transport protein
STM3314	3479967	3480955	+	putative CacA family Na:Ca transport protein
STM3315	3480956	3481955	+	putative polysialic acid capsule expression protein
STM3316	3481962	3482542	+	putative protein of HAD superfamily
STM3317	3482519	3483114	+	putative inner membrane protein
STM3318	3483067	3483637	+	putative ABC superfamily transport protein
STM3319	3483644	3484369	+	putative ABC superfamily transport protein
STM3320	3484314	3485850	+	sigma N factor of RNA polymerase
STM3321	3485861	3486160	+	putative sigma N modulation factor
STM3322	3486259	3486769	+	sugar specific PTS family enzyme IIA
STM3323	3486800	3487669	+	putative P-loop-containing kinase
STM3325	3488176	3488819	+	putative cytoplasmic protein
STM3327	3489619	3490288	-	sigma cross-reacting protein 27A (SCRP-27A)
STM3328	3490499	3492847	-	sensory histidine kinase in two-component regulatory system with ArcA
STM3329	3492929	3493876	-	putative FeS oxidoreductase
STM3333	3501797	3503098	+	putative purine-cytosine permease
STM3335	3504448	3504928	-	putative cytoplasmic protein
STM3337	3505784	3506484	-	putative ManNAc-6P epimerase
STM3338	3506520	3508010	-	MFS family sialic acid transport protein
STM3339	3508126	3509028	-	N-acetylneuraminate lyase
STM3340	3509154	3509945	-	putative gntR family regulatory protein
STM3341	3510054	3510569	-	stringent starvation protein B
STM3342	3510560	3511210	-	stringent starvation protein A
STM3344	3512413	3512811	-	30S ribosomal subunit protein S9
STM3345	3512821	3513264	-	50S ribosomal subunit protein L13
STM3346	3513552	3514695	-	putative ATPase
STM3347	3514856	3515267	+	putative periplasmic protein
STM3348	3515404	3516791	+	serine endoprotease
STM3349	3516884	3517954	+	periplasmic serine endoprotease
STM3354	3522254	3522887	-	putative tartrate dehydratase beta subunit
STM3355	3522871	3523781	-	putative tartrate dehydratase alpha subunit
[truncated: 691 more rows]
